# Supplementary material for: Comparative Transcriptome Profiling of Rice Near-Isogenic Line Carrying Xa23 under Infection of Xanthomonas oryzae pv. oryzae
Source: Int J Mol Sci. 2018 Mar 2;19(3):717. doi: 10.3390/ijms19030717 (PMC5877578; doi:10.3390/ijms19030717)
Supplement: Supplementary file 1 [file ijms-19-00717-s001.xlsx]

## Sheet: S1
Table S1. Detailed summary of RNA-Sequencing results.
Sample name	Raw reads	Clean reads	Total reads	Total mapped	Multiple mapped	Uniquely mapped	Read-1	Read-2	Reads map to '+'	Reads map to '-'	Non-splice reads	Splice reads		Q30(%)	GC content(%)
C0	46594244	44372944	44372944	36489861 (82.23%)	678610 (1.53%)	35811251 (80.71%)	18547252 (41.8%)	17263999 (38.91%)	17891333 (40.32%)	17919918 (40.38%)	21010429 (47.35%)	14800822 (33.36%)		91.28	53.63
J0	51085434	48289010	48289010	39611914 (82.03%)	700689 (1.45%)	38911225 (80.58%)	20193270 (41.82%)	18717955 (38.76%)	19442341 (40.26%)	19468884 (40.32%)	22829475 (47.28%)	16081750 (33.3%)		91.18	53.94
CBB23-12 hpi	57398598	54774152	54774152	45086818 (82.31%)	700435 (1.28%)	44386383 (81.04%)	22916818 (41.84%)	21469565 (39.2%)	22159152 (40.46%)	22227231 (40.58%)	27022329 (49.33%)	17364054 (31.7%)		92.03	54.29
CBB23-24 hpi	52122832	49294374	49294374	41275771 (83.73%)	556327 (1.13%)	40719444 (82.6%)	21068915 (42.74%)	19650529 (39.86%)	20334959 (41.25%)	20384485 (41.35%)	24780605 (50.27%)	15938839 (32.33%)		91.39	55.23
CBB23-36 hpi	65574380	62882740	62882740	50963164 (81.04%)	906348 (1.44%)	50056816 (79.6%)	26027471 (41.39%)	24029345 (38.21%)	25023340 (39.79%)	25033476 (39.81%)	31657726 (50.34%)	18399090 (29.26%)		91.58	53.4
CBB23-48 hpi	41893788	40539554	40539554	33922512 (83.68%)	460760 (1.14%)	33461752 (82.54%)	17301122 (42.68%)	16160630 (39.86%)	16747496 (41.31%)	16714256 (41.23%)	20652078 (50.94%)	12809674 (31.6%)		92.06	54.14
JG30-12 hpi	49890010	48749132	48749132	40250051 (82.57%)	999348 (2.05%)	39250703 (80.52%)	20247575 (41.53%)	19003128 (38.98%)	19608950 (40.22%)	19641753 (40.29%)	22855794 (46.88%)	16394909 (33.63%)		92.73	54.96
JG30-24 hpi	54891574	52116660	52116660	43303751 (83.09%)	563725 (1.08%)	42740026 (82.01%)	22272678 (42.74%)	20467348 (39.27%)	21347967 (40.96%)	21392059 (41.05%)	26986647 (51.78%)	15753379 (30.23%)		90.8	54.93
JG30-36 hpi	45507160	44119566	44119566	35292193 (79.99%)	731234 (1.66%)	34560959 (78.33%)	17764518 (40.26%)	16796441 (38.07%)	17278326 (39.16%)	17282633 (39.17%)	22374860 (50.71%)	12186099 (27.62%)		92.41	52.85
JG30-48 hpi	57418698	54514722	54514722	45769331 (83.96%)	638025 (1.17%)	45131306 (82.79%)	23409484 (42.94%)	21721822 (39.85%)	22575284 (41.41%)	22556022 (41.38%)	26657182 (48.9%)	18474124 (33.89%)		91.14	54.8

## Sheet: S2
Table S2. Detailed list of DEGs in CBB23 relative to JG30 before and after PXO99A infection. P-value ≤ 0.05 and log2 fold change ≥1 or ≤ − 1 were used as a threshold level to retrieve the significance of gene expression difference. The gene ID, description and FPKM based expression pattern are also mentioned in the table.
		log2FC					FPKM based expression pattern
Gene ID	Description	C0 vs. J0	CBB23-12 hpi vs. JG30-12 hpi	CBB23-24 hpi vs. JG30-24 hpi	CBB23-36 hpi vs. JG30-36 hpi	CBB23 48 hpi vs. JG30-48 hpi	C0	CBB23-12 hpi	CBB23-24 hpi	CBB23-36 hpi	CBB23-48 hpi	J0	JG30-12 hpi	JG30-24 hpi	JG30-36 hpi	JG30-48 hpi
Os01G0101700	Similar to chaperone protein dnaJ 20.	0	0	0	0	1.0738	9.53514	18.9256	98.7709	12.4821	267.815	13.0428	19.0507	89.2302	12.5749	139.652
Os01G0104400	Ricin B-related lectin domain containing protein.	0	1.0019	0	0	0	183.969	567.46	214.189	220.264	159.887	310.112	282.596	218.028	175.978	248.778
Os01G0106400	Similar to Isoflavone reductase homolog IRL	0	0	0	0	1.7042	18.5145	19.3826	28.6895	36.6965	80.9331	18.6624	4.91558	8.8438	15.145	27.2627
Os01G0108000	Conserved hypothetical protein.	0	0	0	1.6488		24.7356	19.0253	17.9493	25.5238	15.4938	13.6999	18.4696	8.64617	8.53903	13.5158
Os01G0108400	Helix-loop-helix DNA-binding domain containing protein.	6.3052	0	4.6075	3.4194	0	43.3421	4.71161	32.1964	59.6553	17.4171	0.547126	0.0791649	1.20443	5.84933	2.52937
Os01G0108600	Basic helix-loop-helix dimerisation region bHLH domain containing protein.	0	1.799	0	1.2596	0	47.4086	121.698	44.5302	101.546	29.0186	27.3433	34.8784	45.8436	44.492	21.4426
Os01G0109000	Similar to Late embryogenesis abundant protein, group 3.	0	0	0	-1.5951	0	15.584	8.21803	7.16326	14.513	6.45077	25.328	13.4135	20.9704	45.9954	11.221
Os01G0109500	Conserved hypothetical protein.	-3.5064	-4.4271	0	0	0	1.54886	0.785343	0.523501	1.31607	0.0568257	17.5705	16.8491	6.06736	13.5236	2.15232
Os01G0110200	Conserved hypothetical protein.	0	0	0	2.0254	0	0	31.6532	13.7746	38.0206	6.82318	0	11.467	5.75149	9.79707	4.02613
Os01G0124000	Similar to Bowman Birk trypsin inhibitor.	0	2.7405	0	0	0	19.7158	56.2533	69.567	5.42055	12.7853	2.71863	8.39496	31.7354	15.1831	1.85582
Os01G0127700	Conserved hypothetical protein.	0	0	-1.5154	0	0	1.99277	8.0573	9.66762	19.4008	11.0938	4.13645	4.28352	25.204	23.3915	11.2104
Os01G0130200	Hypothetical conserved gene.	0	0	0	0	-1.3663	31.7167	12.2583	186.435	157.628	79.6468	7.69966	8.11688	173.772	173.761	225.393
Os01G0130900	Conserved hypothetical protein.	0	0	-2.6667	2.3822	0	4.5214	18.072	6.90662	46.6684	2.23351	6.39859	12.5848	39.9931	9.39088	1.82207
Os01G0132000	Similar to Wound-induced protease inhibitor (WIP1).	0	0	1.4216	0	0	5.34053	102.903	138.728	32.5315	17.6641	1.81877	159.94	47.2282	25.6926	14.9716
Os01G0135700	EF-HAND 2 domain containing protein	0	1.5416	-4.476	0	0	2.50428	71.2405	11.6168	27.5355	12.1469	2.51135	24.4049	235.763	24.6394	13.7132
Os01G0135900	Similar to Cytosolic class I small heat shock protein 3C (Fragment)	0	0	0	-1.1401	0	116.434	390.917	335.108	169.033	181.856	168.649	244.754	232.03	390.813	362.654
Os01G0141000	ABI3/VP1-2, RAV subfamily member 2	0	0	0	1.9554	-1.8584	3.90276	4.49888	72.141	192.399	8.16642	0.599406	4.7759	40.098	52.044	32.5038
Os01G0148000	Similar to predicted protein.	0	-1.959	0	0	-2.0719	15.5138	9.57914	12.7142	3.19631	3.5883	13.8897	37.1438	4.96247	3.52479	16.5601
Os01G0149800	Metallothionein-like protein type 2.	0	1.0876	0	0	0	1524.75	2066.58	1834.97	2704.6	2288.61	1726.8	969.808	1716.3	3234.09	1669.43
Os01G0151200	Similar to Inner membrane protein ALBINO3, chloroplast precursor.	0	-1.0223	0	0	0	288.473	141.704	146.977	95.9326	281.807	295.312	287.052	115.22	108.444	245.869
Os01G0178500	Similar to Auxin-responsive protein	1.5464	0	0	0	0	53.0631	24.066	38.2018	59.1713	29.1012	18.1344	50.401	32.2889	54.1959	21.2894
Os01G0179000	Transferase family protein.	0	3.5764	0	0	0	0.0379592	10.171	2.09709	5.2113	0.242325	0.174899	0.8503	1.2683	1.99264	0
Os01G0186900	Similar to cDNA clone:001-117-G12, full insert sequence.	0	3.0433	0	0	0	0.100506	20.9365	0.850793	2.15817	1.6575	0.0463087	2.53279	28.2502	1.60349	0.810053
Os01G0190000	Similar to oxidoreductase.	0	0	0	0	1.4208	212.092	110.496	102.857	131.056	116.711	217.282	124.966	89.336	154.631	47.8493
Os01G0207400	Similar to peptide-N4-asparagine amidase A.	0	1.2365	0	0	0	2.9399	82.3646	25.7796	19.3808	14.218	5.11045	34.8607	47.0493	32.0486	11.7936
Os01G0214200	Esterase, SGNH hydrolase-type, subgroup domain containing protein.	0	0	0	1.1428	0	45.565	43.5927	14.4718	79.586	15.7714	35.8715	38.4377	13.62	37.812	15.7909
Os01G0220200	Similar to Uncharacterized plant-specific domain TIGR01589 family protein	0	-1.3761	0	0	-1.1208	62.2875	27.6814	94.6672	15.1554	69.1458	45.2552	71.6577	72.5399	19.8825	165.054
Os01G0223200	Lipase, GDSL domain containing protein.	-1.4899	0	0	-1.496	0	14.2509	44.8164	52.4538	10.984	37.4108	39.955	29.3406	54.1509	32.5007	50.7105
Os01G0239200	Similar to Phophate translocator (Fragment).	0	-1.0713	0	0	0	104.637	67.2472	89.4865	24.1723	34.0948	110.398	140.924	65.4844	23.8544	46.4169
Os01G0256500	Similar to ZnI.	0	1.18	0	0	0	91.2647	156.618	72.7701	348.642	43.2722	75.2566	68.935	133.443	273.779	26.8136
Os01G0259900	Conserved hypothetical protein.	-5.5111	0	0	0	0	0.413381	0.202616	0.22101	0.407449	0.52779	18.8182	0.540161	5.38668	7.82909	6.86341
Os01G0272850	Hypothetical protein.	0	-1.2066	0	0	0	56.0323	28.6652	1.70022	10.8451	1.2874	56.5663	65.9802	0.816351	11.2091	3.00071
Os01G0276900	Conserved hypothetical protein.	0	2.2691	0	3.5361	0	0.28224	47.9571	54.7418	64.2485	54.053	0.60687	9.92246	104.283	5.8102	82.3471
Os01G0278000	VQ domain containing protein.	0	0	-3.3068	0	0	4.3223	21.4489	4.77119	4.22394	7.48162	5.05312	7.76736	43.0559	5.44498	4.83554
Os01G0278900	Similar to 50S ribosomal protein L40.	0	0	0	0	1.1533	488.893	468.643	192.618	328.536	266.839	445.396	362.48	150.851	411.95	131.684
Os01G0283700	Similar to Cinnamoyl-CoA reductase (EC 1.2.1.44).	0	0	0	0	-6.0549	0.266828	4.62103	9.41533	1.01442	0.170338	0.393416	8.91576	2.45171	1.26337	12.4303
Os01G0290800	Hypothetical protein.	0	0	1.079	0	0	3.63433	19.0966	30.5729	17.4339	6.39008	4.91009	19.3177	13.1979	12.2052	5.48601
Os01G0292200	Serine/threonine protein kinase domain containing protein.	0	0	0	0	1.2762	8.85376	29.8673	215.564	20.6732	203.448	10.6241	13.0792	198.723	16.2595	92.2021
Os01G0303000	Similar to CP12 (Fragment)	0	0	0	0	1.1412	6563.45	5644.92	1778.56	3023.34	2298.96	9106.12	5083.22	1554.7	2523.1	1144.11
Os01G0305200	Lg106-like family protein.	0	1.1962	0	0	0	15.9419	111.963	120.03	117.811	102.453	17.7471	48.7325	154.971	80.6136	79.3349
Os01G0310500	Protein kinase, catalytic domain domain containing protein.	0	-1.1614	0	0	0	24.9951	8.81268	8.60725	8.89501	6.2756	21.2057	19.659	6.88335	10.6641	7.45463
Os01G0314800	Late embryogenesis abundant protein 3 family protein.	0	2.2393	-1.3	0	0	8.29408	114.292	869.363	611.362	1360.62	6.83856	24.1405	1952.08	332.835	1224.73
Os01G0318202	Hypothetical gene.	0	0	0	3.6911	0	0.189888	0.206827	0.0564007	16.4436	0	0.174984	0.0886157	0.105743	1.33559	0.0255075
Os01G0332100	Similar to Neutral invertase-like protein (Fragment).	0	0	-1.5194	0	0	32.9692	52.193	35.0079	35.1652	14.2717	38.8715	48.7275	91.5228	44.799	8.13673
Os01G0357900	Similar to RALF.	0	1.7095	-1.4821	0	0	9.3414	85.7757	41.9391	106.365	43.7697	11.1741	26.1563	106.84	66.1039	46.3319
Os01G0368900	Similar to Glutaredoxin-C1.	0	0	-1.8718	0	0	31.885	186.449	54.9188	95.1489	35.5618	38.5201	98.9334	183.294	115.439	26.8009
Os01G0382000	Similar to Pathogenesis-related protein PRB1-2 precursor.	0	-1.8456	0	2.7087	0	31.427	27.9477	19.3543	838.986	372.213	34.8258	100.176	12.4942	134.633	484.465
Os01G0384800	Conserved hypothetical protein.	0	1.1018	-1.8571	0	0	49.29	107.374	41.1354	120.469	14.3259	48.5971	49.8946	135.902	127.867	13.5652
Os01G0389200	Protein of unknown function DUF679 family protein.	0	0	0	1.6198	0	0.135428	3.20833	18.946	55.5393	2.5216	0.873592	1.26402	19.6836	18.9579	5.56675
Os01G0389700	Protein of unknown function DUF679 family protein.	0	0	0	1.7143	0	6.18537	15.449	43.3323	192.509	10.212	10.155	9.55549	63.2472	61.5439	13.3513
Os01G0507700	Heavy metal transport/detoxification protein domain containing protein.	0	1.0713	0	0	0	179.14	383.279	311.543	218.231	330.072	234.158	181.911	438.474	376.098	385.226
Os01G0508100	Ferritin/ribonucleotide reductase-like family protein.	0	0	0	1.6693	0	6.42182	4.8713	13.6925	159.614	6.5886	1.90214	0.749224	17.8167	52.6438	20.6109
Os01G0511000	Similar to LOB domain protein 40.	0	0	0	2.8066	0	0.555304	5.33016	4.82441	193.457	1.87095	0.682292	1.59807	8.34928	29.0075	2.05132
Os01G0524700	Armadillo-like helical domain containing protein.	0	-1.2268	0	0	0	15.8845	8.42918	3.01537	4.67379	10.644	13.462	19.6756	1.39017	4.72035	10.0602
Os01G0529800	Similar to Very-long-chain fatty acid condensing enzyme CUT1.	0	1.1125	0	0	0	2.81305	58.3634	21.442	23.0977	11.4311	1.59283	26.9198	10.4465	11.233	24.1749
Os01G0556650	Hypothetical protein.	0	0	0	1.699	0	102.925	130.141	93.5799	216.024	171.1	144.401	86.4324	126.797	69.7995	166.037
Os01G0559750	Hypothetical gene.	-1.0007	1.1702	0	0	0	101.225	822.264	240.464	267.153	693.257	202.189	364.387	427.073	262.632	786.52
Os01G0580500	ACC oxidase, Ethylene biosynthesis	0	0	0	3.6327	0	5.36899	16.4586	7.79269	56.5826	1.70784	2.34628	6.14769	1.84938	4.78568	2.85511
Os01G0582600	Phospholipase A2, active site domain containing protein.	0	1.2593	-1.704	0	0	12.8397	70.3076	32.6925	35.9653	36.1483	10.1176	29.2909	97.1374	28.284	33.2824
Os01G0588900	Cytokinin-activating enzyme, Bioactive cytokinin synthesis	0	0	-1.1233	0	0	141.126	274.714	243.756	159.099	296.498	192.099	144.85	484.247	185.674	216.666
Os01G0595600	Alpha/beta hydrolase fold-1 domain containing protein.	0	0	0	0	-1.0479	111.367	363.623	602.674	327.257	220.565	65.0801	266.793	410.964	244.133	500.547
Os01G0597600	Amino acid transporter, transmembrane domain containing protein.	0	2.6728	-2.2741	0	0	0.0864417	15.2175	8.62681	8.79399	1.47154	0.2788	2.38007	38.0522	2.58026	3.23965
Os01G0600900	Chlorophyll a-b binding protein 2, chloroplast precursor (LHCII type I CAB-2) (LHCP)	0	-1.847	0	0	0	9598.09	430.906	12913	1405.07	8776.07	5034.55	1546.05	14497.2	1732.17	6769.79
Os01G0606900	Heat shock protein DnaJ, N-terminal domain containing protein.	0	1.6583	0	0	0	23.0851	55.6055	0.576737	2.54423	0.803424	30.518	17.5694	1.48678	4.16381	0.434719
Os01G0609300	Similar to Pleiotropic drug resistance protein 3.	0	0	0	0	-1.2979	7.89567	13.8082	15.648	29.5193	10.3802	7.81956	11.9435	14.5362	29.2153	28.015
Os01G0615050	Proteinase inhibitor I13, potato inhibitor I family protein.	0	0	1.4083	1.0102	0	3.47318	23.2822	899.046	1251.68	751.244	2.07096	33.9424	308.889	651.902	954.313
Os01G0618400	Similar to RNA helicase (Fragment).	0	-1.3662	0	0	0	72.4449	29.2793	7.53831	18.1263	8.371	60.1583	75.2755	3.69819	23.6562	8.25035
Os01G0619900	Similar to DNA binding.	0	0	0	-1.2999	0	146.07	137.82	117.896	36.8142	49.8894	120.872	93.8297	105.921	95.0845	63.489
Os01G0623200	Similar to C4-dicarboxylate transporter/malic acid transport protein.	0	1.846	0	0	0	0.138318	23.5476	1.10925	11.1793	0.735829	0.509846	6.53239	3.9976	2.47725	1.40466
Os01G0631200	Similar to siroheme uroporphyrinogen methyltransferase1	0	0	-1.7567	0	0	5.51953	13.6809	14.3344	11.2593	7.57919	7.73815	9.42268	44.1741	7.52646	11.2166
Os01G0633000	Similar to 50S ribosomal protein L31.	0	0	0	0	1.0116	424.917	477.554	279.798	239.683	723.135	459.57	527.977	182.879	279.324	393.695
Os01G0635200	Homeodomain-like containing protein.	-1.0311	0	0	0	0	117.275	204.351	155.895	132.717	93.7528	239.24	222.975	206.711	225.231	126.474
Os01G0644000	Twin-arginine translocation pathway signal domain containing protein.	0	0	0	2.0213	0	12.9436	23.1022	23.4549	63.2535	39.1161	5.01165	24.4664	12.0839	16.3458	51.8106
Os01G0647200	Hypothetical conserved gene. (Os01t0647200-01);Non-protein coding transcript	-1.4014	1.7828	0	0	1.7473	42.3987	44.596	19.0912	83.1566	47.9937	111.803	12.9255	27.4525	66.3653	15.6909
Os01G0662300	Similar to Isoform 2 of 50S ribosomal protein L12, chloroplastic	0	0	0	0	1.2914	748.418	632.668	229.041	325.642	281.193	639.093	575.264	150.238	444.112	126.098
Os01G0667900	CC-type glutaredoxin	0	2.1865	-1.2703	0	0	15.4306	34.5825	91.9436	165.412	52.2512	6.49152	7.57679	202.25	128.927	77.5402
Os01G0672400	Drought induced 19 family protein.	0	0	-1.078	0	0	42.5939	73.2703	50.0676	55.0764	45.661	40.4368	48.2015	96.3891	44.67	45.9998
Os01G0674700	OsCRY1	0	-1.0296	0	0	0	121.448	56.8203	17.418	27.9562	9.67615	106.141	115.685	11.9532	32.7743	11.1802
Os01G0678600	Ribosomal protein S20 family protein. (Os01t0678600-01);Similar to ribosomal protein rpS20.	0	0	0	0	1.0976	540.036	417.96	220.256	236.34	208.693	438.748	424.984	189.193	299.224	107.044
Os01G0681600	Hypothetical conserved gene.	0	-1.244	0	0	0	60.019	18.968	31.3946	21.8967	6.92136	34.9177	44.8061	21.7354	29.3248	15.3847
Os01G0692300	Protein of unknown function DUF827, plant domain containing protein.	0	-1.0634	0	0	0	60.8628	31.7816	34.8424	17.6393	35.4631	58.0833	66.2389	26.5953	23.5575	32.6951
Os01G0699600	Serine/threonine protein kinase domain containing protein	0	4.0281	0	0	0	0.199026	31.9074	3.32522	8.40729	0.211758	0.137554	1.95049	10.8892	2.15101	0.601538
Os01G0713200	Similar to Beta-glucanase.	0	0	0	2.0076	0	6.29183	1.27359	307.46	213.526	45.6754	14.4693	4.8331	238.13	55.7067	74.944
Os01G0717000	Similar to GmCK1p (EC 2.7.1.32)	0	0	-1.4365	0	0	68.0263	122.064	24.7438	39.8935	28.972	65.5303	78.6682	61.0773	54.09	38.5648
Os01G0717400	GF-like, alliinase domain containing protein.	-1.1908	1.2597	0	0	0	22.02	88.9336	21.7547	9.67972	8.8774	50.1777	37.0416	16.3935	23.7107	13.2449
Os01G0719100	Similar to RING finger and CHY zinc finger domain-containing protein 1.	0	1.5448	-1.4141	0	1.3037	23.0924	53.2086	27.3446	33.407	83.2999	31.1422	18.1878	66.4549	57.7248	37.0383
Os01G0720500	Type I chlorophyll a/b-binding protein	-3.6608	0	0	0	0	13.9529	44.6951	1046.22	6.11057	108.243	176.161	24.5076	1526.7	23.0692	190.025
Os01G0723800	Similar to P-glycoprotein homologue.	0	0	0	1.7211	0	13.4081	14.7614	3.54424	20.1292	3.41288	12.6513	11.6961	4.05483	6.40526	5.08446
Os01G0730500	Similar to Ferredoxin (Bacterial type ferredoxin family).	0	0	0	0	1.0951	35.9586	36.6996	113.169	14.6976	137.624	65.3403	39.4417	114.039	15.0037	70.7125
Os01G0733500	Similar to Dehydration-induced protein RD22-like protein 1.	0	0	1.7694	0	0	3.48253	177.243	29.3356	18.8733	26.4541	6.67959	95.5848	7.84747	10.5036	57.2137
Os01G0734600	UDP-glucuronosyl/UDP-glucosyltransferase family protein.	-1.3242	0	0	0	0	16.9153	26.9644	16.6659	15.3079	30.7819	42.281	30.3407	17.1764	17.4845	29.5148
Os01G0735300	UDP-glucuronosyl/UDP-glucosyltransferase family protein.	0	0	0	-4.0465	0	0.0789862	19.7767	4.96192	0.583896	22.5645	3.3118	34.8335	1.94634	10.1219	25.5599
Os01G0739200	Protein-tyrosine phosphatase, dual specificity domain containing protein.	0	1.7111	-1.586	0	0	13.1494	42.2026	25.0227	21.1514	35.7589	12.0763	12.8554	68.509	15.1864	28.9562
Os01G0742100	Hypothetical protein.	0	-1.711	0	0	0	37.2652	9.01569	1.48129	6.40458	0.884365	29.4042	29.4371	1.19574	5.98884	3.20074
Os01G0747300	Similar to Plant-specific domain TIGR01615 family protein.	0	0	0	-1.3443	0	15.9605	42.7085	37.5718	16.889	15.3755	17.5191	31.9214	46.9163	44.9873	12.4496
Os01G0757200	GA 2-oxidase3	0	0	0	1.5484	0	0.636815	23.318	1.93598	30.9619	0.9964	0	8.07645	3.91129	11.1045	0.784982
Os01G0760600	Aspartate aminotransferase, cytoplasmic	0	0	0	1.7223	-2.4744	6.91934	45.0598	36.0878	37.2102	9.44161	11.2035	55.6058	16.8821	11.8299	57.5956
Os01G0769700	Receptor-like kinase, Control of reproductive growth and development, Repression of cell death	0	0	-3.0765	0	0	4.45059	10.1016	2.30346	2.02637	7.45737	3.48731	3.90521	17.7198	1.42642	6.91637
Os01G0769900	Similar to PTAC12 (PLASTID TRANSCRIPTIONALLY ACTIVE12).	0	-1.4458	0	0	0	67.2208	24.2748	3.67473	8.1296	3.68087	50.7761	65.9481	1.89463	10.447	5.5951
Os01G0770000	Uncharacterised protein family UPF0089 domain containing protein.	0	0	0	-1.0555	0	21.0153	68.858	36.2504	17.4351	28.3082	33.5493	40.9175	46.3717	38.0152	45.2205
Os01G0770200	Aromatic L-amino acid decarboxylase (AADC), Conversion of tyrosine into tyramine	0	0	0	-1.1339	0	24.87	37.2096	18.4572	14.775	15.5141	28.0667	25.0248	21.0871	34.0147	20.2093
Os01G0773800	Hypothetical conserved gene.	0	0	-3.8997	0	0	0.142192	5.40133	1.58378	1.55168	0.529509	0.065516	0.0663575	21.5575	0.439077	0.515716
Os01G0778100	Hypothetical conserved gene	0	0	0	-1.567	0	33.2156	5.95985	0.524917	11.3894	0.241067	34.0745	2.66454	0.378516	35.4016	0.255657
Os01G0778800	Peptidase M16, core domain containing protein.	0	0	0	0	-1.0413	13.892	12.5145	29.7555	89.0436	16.7058	9.35579	9.15698	23.3426	87.6778	37.7381
Os01G0783100	Pentatricopeptide repeat domain containing protein.	0	-1.3916	0	0	0	22.1623	9.36085	3.3437	4.91142	2.9475	23.6023	24.4931	2.16678	5.65109	3.18679
Os01G0791033	Similar to ribulose-1,5-bisphosphate carboxylase/oxygenase large subunit	-1.4696	4.5878	-1.5472	-2.9225	2.726	85.6085	447.538	136.718	581.656	181.826	236.668	18.5609	364.367	4626.1	30.1664
Os01G0794500	Translation initiation factor SUI1 domain containing protein.	0	1.1599	0	0	0	56.2895	131.38	105.591	169.344	145.542	71.0077	58.641	159.289	157.717	121.29
Os01G0800500	Purple acid phosphatase, N-terminal domain containing protein.	0	0	0	0	1.2127	0.513921	1.70399	9.75136	1.19187	42.1355	1.78291	3.13195	8.66138	0.902378	19.9551
Os01G0805900	Tubulin beta-2 chain (Beta-2 tubulin).	-1.1943	0	0	0	0	18.9715	50.8095	10.0573	16.3435	2.51249	43.3373	35.6381	5.41606	14.8721	3.5807
Os01G0812900	Similar to alphavirus core protein family	0	0	0	1.39	0	14.2814	33.932	25.5344	56.6474	22.1965	20.9019	32.0169	17.1143	22.6743	26.8201
Os01G0816100	Similar to NAC domain protein.	0	0	0	1.1054	0	3.11564	13.018	14.1088	71.0558	3.64101	1.64735	4.38581	10.5381	34.6454	6.83357
Os01G0818700	Leucine-rich repeat, N-terminal domain containing protein.	0	0	0	0	-2.1279	27.506	23.2841	28.3051	10.0814	8.24448	32.6129	38.9954	16.2762	10.4479	39.5538
Os01G0821600	WRKY transcription factor 48-like protein	0	4.018	-2.7779	0	0	0.861007	16.318	4.68	17.7914	1.0535	0.396714	1.00453	29.2716	6.64677	3.26157
Os01G0823600	Conserved hypothetical protein.	0	0	1.5833	0	0	24.6815	3.38548	1028	6.15963	2936.36	35.2197	12.2059	312.864	6.91993	1786.85
Os01G0823700	Protein of unknown function DUF641, plant domain containing protein.	1.3303	0	0	0	0	25.4716	3.81966	1.3776	3.27863	0.842519	10.1117	10.9103	2.09459	4.98743	1.00292
Os01G0825500	Nodulin-like domain containing protein.	0	1.0057	0	0	0	16.5476	60.0398	254.747	16.5437	184.634	38.9773	29.8204	141.555	23.2926	336.607
Os01G0825800	Amino acid transporter, transmembrane domain containing protein.	0	0	0	0	2.3167	8.46978	10.3258	14.7111	4.75226	25.4795	10.4199	5.57782	14.6884	11.3289	5.61362
Os01G0833400	Conserved hypothetical protein. (Os01t0833400-01);Conserved hypothetical protein.	0	0	-2.3995	0	0	18.7444	47.6328	6.33348	34.3203	15.058	17.563	22.0743	30.474	34.7674	15.2596
Os01G0834900	Hypothetical conserved gene.	0	3.6522	-2.8178	0	0	23.3629	407.671	9.06354	32.8966	17.4171	16.1103	32.3377	58.2799	22.5751	11.2723
Os01G0837600	Similar to plant-specific domain TIGR01589 family protein.	-1.0705	0	0	0	0	172.943	216.951	227.895	79.5225	123.149	362.574	303.15	121.295	47.7735	78.6191
Os01G0841700	Similar to Isoform ERG1b of Elicitor-responsive protein 1	0	0	-1.2176	0	0	4.64521	15.1058	52.7745	98.3005	28.8938	15.3938	3.16832	111.928	99.3044	41.4712
Os01G0841800	Ribonuclease II and R domain containing protein.	0	-1.5539	0	0	0	28.1807	12.2256	10.009	5.83809	9.91244	25.7557	35.7996	5.6572	7.71918	15.6301
Os01G0855200	Tetratricopeptide-like helical domain containing protein.	1.034	0	0	0	0	51.5439	21.5892	30.0736	15.9826	101.054	25.1277	22.707	19.9929	11.2375	95.0372
Os01G0858350	Similar to cytochrome P450.	0	0	-2.0818	0	0	9.51955	14.1198	15.4681	17.6095	17.6753	4.713	7.49133	59.716	10.2596	22.807
Os01G0858900	Glycosyl transferase, family 29 protein.	0	0	-1.5086	0	0	16.8457	23.2223	21.1447	26.8275	21.1978	21.8299	15.9875	54.8646	22.9246	22.8137
Os01G0862800	NAC (NAM ATAF1/2 CUC2) transcription factor, Early and transient regulator of abiotic stress responses	0	0	-5.0526	0	0	0	5.91957	0.655053	2.88356	0.111737	0.193553	0.588118	19.8255	2.43217	0.634823
Os01G0863300	Similar to MCB2 protein.	0	2.4838	-3.9918	0	0	1.78523	32.7089	2.49975	13.7357	7.93689	3.52523	5.83184	36.2684	12.0096	4.72765
Os01G0864500	Harpin-induced 1 domain containing protein.	0	0	-2.2236	0	0	0.949963	22.1723	25.5757	32.9149	15.3776	1.62575	8.9298	108.938	32.1975	37.9542
Os01G0869800	22-kDa Photosystem II protein,	-1.0171	0	0	0	0	139.452	315.916	543.928	116.246	1573.95	281.739	292.595	511.588	144.995	1160.16
Os01G0874300	Similar to MybHv5	0	1.0748	0	0	0	9.63495	89.22	27.3941	41.2802	25.291	13.6101	42.2423	52.154	77.2503	25.238
Os01G0884900	Similar to DNA glycosylase.	0	0	0	0	1.1727	98.399	119.987	93.3331	79.3897	303.764	111.304	103.46	100.992	110.523	147.905
Os01G0892800	Similar to Ankyrin-kinase	0	6.4441	-5.9441	0	0	0.0397328	12.9507	0.672684	0.811225	0.634117	0.146457	0.148338	37.7691	1.02243	1.02476
Os01G0896700	Similar to 60S ribosomal protein L5.	0	-2.1322	0	0	0	46.5079	60.3097	42.4558	63.7691	47.0607	71.3293	263.686	42.7875	76.1578	49.0615
Os01G0896800	Ribosomal protein L18/L5 domain containing protein.	0	-2.0385	0	0	0	20.9492	26.0651	20.8209	17.434	12.0019	24.0569	106.789	14.4927	9.39927	24.2011
Os01G0900800	Helix-loop-helix DNA-binding domain containing protein.	0	0	0	1.0107	0	48.2837	66.2416	59.9692	132.897	23.5549	48.5694	45.1384	66.9297	69.1923	25.4754
Os01G0901900	S1, RNA binding domain containing protein.	0	-1.1916	0	0	0	86.7649	27.1553	4.86659	14.6115	4.02053	55.3345	61.8593	2.07143	20.7239	4.90155
Os01G0902100	Similar to MRP-like ABC transporter.	0	0	0	0	2.0591	0.25125	0.805201	1.46383	0.721162	14.312	0.28496	0.613318	2.55073	0.73605	3.76964
Os01G0905200	Exo70 exocyst complex subunit family protein	0	2.8778	-3.736	0	0	1.02152	20.6118	1.60809	4.0754	1.19556	0.564807	2.79675	19.5402	4.45116	1.12521
Os01G0905300	Similar to Leucine zipper protein-like.	0	3.9468	0	0	0	0	7.95604	0.873287	2.35028	0.162929	0.0282227	0.514535	3.19782	3.18392	0.740528
Os01G0905800	Aldolase C-1. (Os01t0905800-01);Aldolase C-1.	0	0	0	1.5744	0	159.651	289.515	265.537	670.076	213.977	196.744	232.492	320.865	236.034	344.855
Os01G0908700	Similar to Hnrpa2b1-prov protein.	0	1.1262	-1.1573	0	0	9.45636	43.0845	27.4504	44.773	14.1411	10.8702	19.6843	55.8356	41.3421	22.2624
Os01G0910500	Conserved hypothetical protein.	0	0	0	1.5173	0	28.0752	93.3133	42.6183	58.5578	8.90077	42.783	111.234	37.2442	21.4592	27.0052
Os01G0910900	Conserved hypothetical protein.	0	0	0	0	1.2939	2053.65	919.189	1117.95	2643.43	2904.77	2208.64	813.494	1513.83	2121.11	1300.39
Os01G0911200	Ribophorin II family protein.	0	0	0	0	-1.2848	37.1476	24.9015	27.3041	20.0776	13.9563	33.4979	45.2789	17.9879	14.1848	37.3234
Os01G0915900	Conserved hypothetical protein.	0	0	0	-4.476	-5.3927	0	0	0.0782649	0.989402	0.373807	0.0404696	0	6.27292	23.0989	17.2377
Os01G0916100	Similar to loricrin.	0	0	0	-1.7857	0	3.88638	0	3.77783	19.0701	4.6362	2.38756	0	18.4942	68.9741	11.2004
Os01G0930400	Potassium transporter	0	0	0	0	-1.0427	7.06153	9.53072	72.1497	109.08	33.5869	4.47536	13.0775	58.1227	96.788	75.9455
Os01G0934100	C2 calcium-dependent membrane targeting domain containing protein.	0	1.5527	-1.6322	0	0	31.4741	172.567	97.6272	121.454	78.0529	37.8942	58.6636	275.991	94.8787	91.4997
Os01G0940700	Similar to Glucan endo-1,3-beta-glucosidase GII precursor	0	-4.1729	1.278	2.5694	0	9.05801	1.91675	225.072	231.038	52.4835	9.50358	34.4792	84.6413	40.8321	66.5844
Os01G0940800	Similar to Beta-1,3-glucanase precursor.	0	0	0	1.8373	0	4.42145	8.08379	29.9706	139.152	8.45652	1.06711	6.23926	18.5103	40.8507	11.3271
Os01G0944700	Similar to Beta-1,3-glucanase precursor.	0	0	8.5033	5.3285	0	0.101598	0.0414977	0.452649	14.0195	0.216193	0.187247	1.23274	0	0.366011	8.55699
Os01G0947700	Conserved hypothetical protein.			8.5033			0	0	6.14434	0	0.0196692	0	0	0.015442	0	0
Os01G0949300	EF-Hand type domain containing protein.	0	1.2047	-1.2093	0	0	17.7325	85.9055	85.1561	178.26	33.4037	20.8947	37.1711	179.566	199.801	43.8717
Os01G0949500	Similar to Calmodulin (CaM).	0	1.4964	-1.328	0	0	16.9646	170.086	109.107	29.6168	178.633	29.0741	60.122	249.79	37.243	174.874
Os01G0963000	Similar to Peroxidase BP 1 precursor.	0	0	1.8446	2.1515	-1.3014	0.887682	17.8728	358.501	581.36	28.3896	0.673655	12.7202	91.0283	137.269	76.8056
Os01G0965900	Conserved hypothetical protein.	-1.2686	0	0	-1.1127	0	32.9011	78.9447	130.662	90.5649	251.63	79.1259	65.2097	129.491	205.449	353.358
Os01G0974200	RicMT (Metallothionein-like protein).	-1.7186	1.1579	0	1.1838	-1.1742	30.3024	1147.3	675.387	2171.34	188.959	99.5553	512.778	728.76	1002.7	468.072
Os01G0975300	MYB-related transcription factor, Drought and salinity tolerance	0	0	-1.144	1.3568	0	80.7549	69.5865	48.5039	359.342	29.2755	65.5214	97.3851	97.7537	147.19	46.2382
Os01G0975900	Similar to Tonoplast membrane integral protein ZmTIP1-2.	-2.0225	0	0	0	0	9.81931	106.895	110.891	28.1702	1243.86	39.8236	86.8455	125.839	37.1312	714.641
Os02G0101750	Hypothetical gene.	0	0	0	0	-1.6887	15.5557	15.5781	19.5125	6.30556	7.06714	16.8621	36.7972	7.73182	3.4846	25.0059
Os02G0114033	Glutamine-Leucine-Glutamine, QLQ domain containing protein.	0	-1.6587	0	0	-1.7074	11.0197	7.02646	10.0226	1.65446	3.3499	8.66208	22.125	3.1064	1.45599	12.0077
Os02G0115700	Catalase isozyme A (EC 1.11.1.6) (CAT-A).	0	0	0	0	-2.0437	1561.95	2094.85	873.358	1461	41.3616	2200.41	1963.84	972.594	1213.65	187.185
Os02G0120000	Pentatricopeptide repeat domain containing protein.	0	-1.2263	0	0	0	23.7475	11.3031	4.51491	6.35051	5.24289	21.1909	26.3742	4.32541	8.62537	2.96186
Os02G0122900	Similar to Dimethyladenosine transferase.	0	-1.5333	0	0	0	27.1447	10.8309	3.85028	5.22622	5.50116	23.3125	31.2643	2.71472	6.31027	6.10201
Os02G0126400	Calcium-dependent protein kinase, Positive regulator of the salt and drought stress responses	0	1.3608	-1.6798	0	0	21.8695	65.7253	44.7716	49.8188	15.7979	24.0114	25.5223	130.806	52.314	21.1567
Os02G0131050	Hypothetical gene.	0	-1.5528	0	0	0	5.14483	4.92332	9.64504	4.39361	7.20854	8.5092	14.4057	4.59889	2.8885	14.3139
Os02G0134400	Fumarate reductase/succinate dehydrogenase flavoprotein, C-terminal domain containing protein.	0	0	0	1.9161	0	1.30109	4.07795	11.0021	43.9501	9.66203	1.73729	4.80794	5.5006	12.217	13.3328
Os02G0137700	NAD(P)-binding domain containing protein.	0	0	2.2388	0	0	1.13336	1.01843	205.185	0.797922	375.473	1.27939	1.26938	39.643	0.554118	374.289
Os02G0138600	Protein of unknown function DUF1677, Oryza sativa family protein.	2.3168	1.5313	2.4242	0	0	79.1267	50.9849	62.9414	9.26381	31.1686	15.8531	17.5919	10.694	11.988	15.6569
Os02G0140400	Similar to Beta-amyrin synthase.	-2.9357	0	-1.5923	-1.5054	-1.272	24.7071	102.814	25.9167	62.0205	26.7737	188.704	132.499	71.2631	184.718	70.97
Os02G0140500	Similar to cycloartenol synthase.	-4.693	-2.3049	-2.4983	-1.9893	-3.4365	4.94559	48.4809	13.1324	22.1447	10.103	127.699	238.922	67.6671	92.2399	120.059
Os02G0148000	CCT domain containing protein.	1.168	0	2.0355	0	0	264.626	64.0413	50.4062	18.6822	41.615	117.562	89.6989	11.2123	22.6402	24.3192
Os02G0151800	Similar to Ca2+/calmodulin-dependent protein kinase phosphatase.	-4.9572	-5.6837	-6.0188	0	-4.6909	3.95923	1.844	0.830101	64.7922	1.0293	122.777	94.5239	49.0838	76.231	29.1814
Os02G0154200	Protein kinase, core domain containing protein.	0	5.0023	0	0	0	1.85108	4.58229	2.63242	0	1.53183	0	0	0.0156184	0	0
Os02G0154600	Domain of unknown function DUF250 domain containing protein.	4.7399	4.0098	5.1346	0	4.9501	13.6535	13.5987	5.93695	0.2165	8.3759	0.510077	0.841914	0.15412	0.126609	0.297417
Os02G0156100	Conserved hypothetical protein.	0	-4.84	0	0	0	0	0	0.0525644	17.3602	0.0627642	12.2855	12.8838	10.2985	19.7944	10.8878
Os02G0156200	Leucine-rich repeat domain containing protein.	0	-4.9804	0	0	0	0.0898211	0.220126	0.133394	3.05647	0.0955669	6.20784	6.93031	4.50169	3.82139	5.2606
Os02G0157600	Arsenate (As(V)) reductase, Rhodanase-like protein	3.2193	3.0578	0	0	2.7393	61.9639	52.0546	35.0079	6.12604	41.801	6.64147	6.23458	10.0581	9.77049	6.87137
Os02G0157700	Non-protein coding transcript.	0	0	0	0	1.0091	129.769	105.901	118.815	116.414	245.739	134.943	93.2163	179.224	131.256	134.016
Os02G0160500	Hypothetical conserved gene.	0	0	0	-1.5313	0	910.464	2009.62	1560.33	628.496	1840.09	1256.63	1327.13	1827.82	1905.74	2286.99
Os02G0168800	Similar to Porphobilinogen deaminase (Fragment).	0	-1.3324	0	0	0	87.7454	27.1722	18.7875	10.9731	13.4889	55.9853	68.2405	9.90668	9.12051	20.7657
Os02G0176700	Similar to autoinhibited calcium ATPase	0	0	0	0	-1.1506	11.5983	14.1445	17.765	15.2835	13.3204	12.8647	21.2316	15.351	15.5366	32.4608
Os02G0177600	4-coumarate:coenzyme A ligase, Lignin biosynthesis, Defense against wounding	0	0	0	0	1.0495	2.37175	26.0253	61.7451	95.4267	75.9429	1.89025	10.9188	54.5884	56.3467	40.2722
Os02G0177700	Uncharacterised protein family UPF0497, trans-membrane plant subgroup domain containing protein.	0	1.5315	0	-1.4004	0	50.6768	107.475	35.2636	64.2847	23.5442	60.3402	37.078	50.5318	178.018	18.6265
Os02G0178100	Similar to CONSTANS-like protein CO6.	0	0	0	-1.4559	0	98.1238	169.686	256.171	43.6099	268.452	115.175	111.167	254.035	125.499	239.876
Os02G0181200	Hypothetical protein	0	0	-1.4915	0	0	17.6612	348.982	115.06	155.543	28.541	20.1134	179.147	295.049	95.0093	59.4893
Os02G0181300	WRKY transcription factor, Defense response	0	2.2275	-2.0044	0	0	18.2024	398.884	121.265	349.706	60.5698	18.1246	84.9457	443.687	276.886	43.3227
Os02G0184300	Hypothetical protein.	0	-1.135	0	0	-1.1168	55.7552	31.7975	54.8233	10.0062	14.7807	44.5843	69.643	51.4597	11.6868	35.1833
Os02G0185200	Cytochrome P450 family protein.	0	0	0	0	-1.7339	2.85715	12.2456	14.543	8.29414	10.6189	2.81323	13.8815	8.79443	4.39116	38.7689
Os02G0187800	Cinnamyl-alcohol dehydrogenase, Lignin biosynthesis, Monolignol biosynthesis	0	0	0	1.6397	0	5.56157	37.1605	141.892	243.502	145.142	3.52952	28.354	77.6606	81.9796	191.563
Os02G0194700	Similar to Lipoxygenase 2.3, chloroplast precursor (	0	-1.2597	0	0	0	51.6766	25.4792	223.288	13.2469	422.879	46.0808	60.8441	276.37	18.1706	330.234
Os02G0197125	Hypothetical protein.	0	0	0	0	1.009	16.0629	29.1215	43.1119	31.8331	66.1952	16.8869	16.1084	48.5942	32.435	36.1037
Os02G0203000	Similar to transcription factor HY5.	0	0	0	-1.0782	0	67.5258	86.9222	98.807	56.8704	271.416	108.199	84.7611	48.5097	125.971	293.953
Os02G0205300	Similar to TAT-binding protein homolog	0	0	0	0	-1.2259	50.7926	83.829	64.9582	54.8245	38.1711	56.3575	101.419	44.0567	33.6598	97.9974
Os02G0208500	Conserved hypothetical protein.	0	0	0	-2.2814	0	12.9402	200.927	17.2525	23.5637	22.5671	31.2908	128.042	7.8833	120.175	22.1921
Os02G0227200	Early nodulin	0	0	0	1.0769	0	53.5368	96.0475	90.8224	233.544	64.6294	53.3195	81.2949	71.4653	116.145	106.961
Os02G0228300	Protein kinase, core domain containing protein.	0	-1.3528	0	0	-1.6195	21.2694	6.45279	29.863	13.9216	19.6913	24.3014	16.4364	17.6489	12.7662	66.4153
Os02G0236800	Similar to Peroxidase (EC 1.11.1.7).	0	0	0	-1.1834	0	50.1142	24.8824	11.4177	26.108	2.36849	45.3802	27.9225	14.6036	62.2009	2.58186
Os02G0240300	Similar to Class III peroxidase GvPx2b	-1.1075	0	0	0	0	82.6832	179.239	28.7723	233.332	0.675844	177.85	92.2905	57.4811	184.051	1.19458
Os02G0254600	Conserved hypothetical protein.	0	0	-1.2967	0	0	57.6998	66.4282	48.6909	69.7694	65.7267	41.3079	54.1999	109.082	36.2254	49.5652
Os02G0255700	Conserved hypothetical protein.	0	-1.1719	0	0	0	123.891	56.6617	49.6663	39.4737	42.2763	94.1213	127.324	50.2293	50.7749	33.1762
Os02G0255801	Non-protein coding transcript	0	-2.0491	0	0	0	46.4146	11.1927	16.7042	2.09375	8.92749	33.767	46.1958	11.0012	4.20898	11.5138
Os02G0274100	3-hydroxyacyl-CoA dehydrogenase	0	0	0	0	-1.2929	76.9854	100.169	83.8335	146.491	50.102	76.1252	110.738	54.8845	94.2445	134.751
Os02G0275200	Xyloglucan fucosyltransferase family protein.	0	0	0	1.3768	0	10.3182	9.65397	22.3333	54.219	6.57176	14.2461	15.4288	16.343	21.9026	16.8627
Os02G0301100	AG1-activating protein 1 homologue domain containing protein.	0	1.1281	0	1.5407	0	90.4783	296.654	39.868	644.533	19.092	118.019	135.355	37.9665	232.409	31.1002
Os02G0318500	ABC transporter-like domain containing protein.	0	0	0	0	-1.1009	7.7203	29.5483	28.4938	11.3405	19.7241	5.92862	31.7141	18.1522	9.90862	46.4373
Os02G0324700	Similar to senescence-associated protein.	0	0	-1.4949	0	0	48.221	83.2804	43.7343	86.7099	40.2636	40.0507	43.9367	112.408	62.2637	31.8406
Os02G0326700	Peptidase S54, rhomboid domain containing protein.	0	-1.4497	0	0	0	101.666	31.6206	226.196	22.2807	102.49	86.3276	86.142	229.981	30.0221	104.601
Os02G0437200	SNAP-34.	0	1.1886	-1.441	0	0	19.6738	53.3196	36.1002	73.2127	23.2228	22.235	23.3299	89.3859	63.2128	29.8817
Os02G0460200	Similar to OSIGBa0131F24.5 protein.	1.6793	-1.7366	0	0	0	384.167	69.4887	456.869	250.124	693.743	119.739	230.949	477.005	497.14	593.694
Os02G0488600	Armadillo-like helical domain containing protein.	0	0	-1.058	0	0	25.4005	50.8143	43.2576	27.3185	59.4376	17.5257	27.3212	82.1321	27.152	71.6697
Os02G0526400	Similar to ATP-dependent Clp protease ATP-binding subunit.	0	0	0	1.8788	0	15.0068	32.4866	34.0318	138.353	26.9572	9.77244	30.0908	41.4081	39.4658	48.965
Os02G0527200	Similar to OSIGBa0142C11.2 protein.	0	2.2647	-2.023	0	0	9.94099	127.162	28.6428	14.752	69.0983	14.1525	26.3907	106.159	22.9154	48.7928
Os02G0527300	Similar to Heat shock transcription factor 31	0	0	-2.356	0	0	48.1489	45.5529	14.7966	15.6474	8.71818	32.2082	32.5542	69.0811	22.4288	8.32827
Os02G0527600	Similar to CTR1-like protein kinase.	0	0	0	1.9646	0	3.3512	8.31375	13.761	20.4623	12.0934	4.1982	7.58176	10.1135	5.49995	9.78328
Os02G0532500	Germin-like protein, Fungal blast and bacterial blight resistance	0	0	0	1.0613	0	5.41263	29.7649	94.2837	176.779	20.2965	13.0169	14.786	72.8906	88.8679	25.9619
Os02G0539200	Zinc finger, RING/FYVE/PHD-type domain containing protein.	0	4.0753	0	0	0	0	10.06	1.31395	3.61954	0.212016	0	0.595158	2.89623	3.2407	0.256969
Os02G0540700	Similar to Arm repeat-containing protein.	0	0	-3.8225	0	0	0.431354	9.93698	2.114	3.73537	3.90106	0.953996	2.73771	27.2757	4.79513	2.64222
Os02G0541325	Similar to Serine decarboxylase.	0	0	-1.2422	0	0	85.5468	92.205	45.8542	132.533	34.2784	85.8746	60.6535	98.9203	134.457	36.8671
Os02G0569900	Cytochrome P450 family protein.	0	0	2.0762	0	-2.1397	0.197585	0	32.36	49.1881	5.67605	0.327738	0	6.99785	26.0726	27.4544
Os02G0570400	Similar to Ent-kaurene synthase 1A.	0	-1.0465	1.8142	0	0	99.1071	44.4386	28.8016	49.7446	17.7528	91.3284	91.5432	7.46904	34.767	34.0684
Os02G0571100	Terpenoid synthase domain containing protein.	0	1.6859	0	0	0	41.3085	64.2069	37.2065	120.772	34.5669	81.894	19.9029	40.6136	208.917	58.7138
Os02G0571800	Terpene synthase-like domain containing protein.	0	0	0	0	-1.5673	10.6212	7.28825	14.7404	31.6493	6.24359	23.221	7.58365	13.4188	45.8888	20.3096
Os02G0573200	Similar to Cryptochrome 1.	0	-1.0257	0	0	0	67.1912	25.3565	39.6328	26.9826	49.0951	50.0668	51.4871	28.7098	23.0692	53.3156
Os02G0575700	Similar to OSIGBa0097P08.1 protein.	0	1.0143	0	0	0	12.2557	33.3656	48.755	41.0069	63.9023	20.3196	16.4738	31.4385	33.213	86.8763
Os02G0581400	Conserved hypothetical protein.	0	-1.7048	0	0	0	20.3773	5.29656	3.28452	1.18444	3.11737	15.7296	17.2196	1.87897	1.90676	2.69664
Os02G0584800	Heavy metal transport/detoxification protein domain containing protein.	0	1.2818	-1.2186	0	0	21.857	117.366	130.302	208.802	90.7829	38.3447	48.1411	276.533	258.109	133.927
Os02G0589000	Lecithin:cholesterol acyltransferase family protein.	-2.9864	0	0	-3.6295	0	5.08486	259.851	62.7065	12.4284	73.3431	40.2268	155.005	35.5821	161.361	69.168
Os02G0589400	UDP-glucuronosyl/UDP-glucosyltransferase family protein.	0	0	0	-2.3188	0	2.51702	57.3912	17.184	3.90899	15.5169	9.61896	37.4154	11.5018	20.4595	20.1076
Os02G0594900	Glycosyl transferase, family 17 protein.	0	0	-1.5094	0	0	15.5509	32.3896	15.4338	17.3902	13.2206	17.4185	23.3356	40.0702	15.5803	13.5958
Os02G0601300	Similar to Glyceraldehyde-3-phosphate dehydrogenase, cytosolic 3 (EC 1.2.1.12).	0	0	0	2.7099	0	3.86761	20.7937	13.9054	41.5723	9.28273	8.37138	26.4021	11.5326	6.66576	27.1486
Os02G0603600	Conserved hypothetical protein.	0	0	0	1.8748	0	4.69596	8.57746	9.30911	42.7196	3.53675	4.03565	4.77694	8.02142	12.2197	3.95493
Os02G0613900	Similar to Adenine phosphoribosyltransferase 2 (EC 2.4.2.7) (APRT).	0	2.7389	0	0	0	2.24501	27.6623	5.11227	16.6838	1.26066	7.52816	4.13256	2.55246	10.0135	2.46283
Os02G0621300	Fatty acid hydroxylase domain containing protein.	0	0	0	1.695	-1.3753	0.924107	7.87261	5.62291	27.1767	8.62426	0.437953	3.89364	7.16776	8.80526	24.5574
Os02G0625500	Similar to Adenosine kinase-like protein	0	0	0	1.2152	0	54.7065	123.552	192.506	255.955	106.571	60.3886	117.767	105.791	115.648	179.121
Os02G0626100	Similar to Phenylalanine ammonia-lyase.	0	0	0	1.3342	0	127.541	319.882	604.358	689.771	339.121	81.3262	266.975	300.021	286.988	463.527
Os02G0627100	Similar to Phenylalanine ammonia-lyase (EC 4.3.1.5).	0	0	1.0525	2.0895	0	3.32163	12.5664	92.845	38.0876	25.6947	2.65949	7.01365	40.8226	9.38812	38.7528
Os02G0633066	Protein kinase, catalytic domain domain containing protein.	0	0	-1.5064	0	0	1.51837	1.33726	10.7391	11.8256	8.9862	4.43807	0.531437	27.8234	21.9289	9.56068
Os02G0651900	Hypothetical protein.	0	1.0362	0	0	0	4.31141	152.052	65.6098	98.081	59.7771	6.58031	73.942	56.4962	52.7676	45.4451
Os02G0653900	Similar to Avr9/Cf-9 rapidly elicited protein 14	0	1.6217	-1.0505	0	0	22.8728	84.723	43.9458	37.2843	38.3691	33.6625	27.4567	83.0055	47.2922	46.1276
Os02G0654700	AP2/ERF family protein, Abiotic stress response	0	3.1652	0	0	0	2.82283	55.0142	22.054	70.8002	3.05704	4.27352	6.11624	24.5056	75.6479	8.77551
Os02G0655200	ERF family protein, Transcriptional regulator, Salt stress tolerance	0	1.5519	0	0	0	3.29936	84.728	12.589	12.1504	31.4137	5.30121	28.8205	15.9705	13.6712	31.4331
Os02G0661100	Similar to Trehalose-6-phosphate phosphatase	0	2.1739	0	0	0	4.55951	19.9684	3.49853	3.09117	1.16788	6.57479	4.41323	12.131	1.78164	1.32703
Os02G0669100	Dehydrin family protein.	0	0	-2.4027	0	0	24.4471	150.321	48.6296	107.019	104.098	34.4935	119.769	234.5	68.1292	106.776
Os02G0670900	Similar to amino acid transport protein.	0	0	-1.133	0	0	21.047	40.3175	63.3228	34.5013	29.1522	26.1817	30.2645	126.651	41.8545	50.8057
Os02G0672200	Similar to AGO1 homologous protein.	0	0	0	0	-1.1839	17.5909	12.5969	20.6711	10.9042	9.30996	13.8141	21.9686	15.4114	8.14551	23.2166
Os02G0673500	Basic helix-loop-helix dimerisation region bHLH domain containing protein.	0	0	-1.1188	0	0	7.13974	28.2621	41.673	47.635	37.9059	9.55994	31.4857	82.5336	35.4377	56.2894
Os02G0676800	ETHYLENE RESPONSE FACTOR 20	0	4.7275	-5.7246	0	0	0	19.2009	1.17314	0.190834	0.164798	0.0356832	0.72283	56.5715	0.39857	0.46814
Os02G0677300	AP2/EREBP138	0	4.721	-8.5724	0	0	0.102955	17.7881	0.13761	0.144968	0.0547707	0.0474373	0.672653	47.7726	0.158958	0.0829795
Os02G0681200	Zinc finger, RING/FYVE/PHD-type domain containing protein.	0	1.6851	0	0	0	22.5879	114.756	50.8271	58.3397	18.4297	29.2931	35.5914	81.1423	65.7002	18.2564
Os02G0682300	Zinc finger, RING/FYVE/PHD-type domain containing protein.	0	3.8588	-2.3908	0	0	0.126043	31.6619	5.50333	18.4134	1.0058	0.813054	2.17639	26.3212	10.5087	2.4889
Os02G0696650	Hypothetical gene.	0	-1.3356	0	0	0	59.9472	24.7022	39.7756	12.3253	22.4971	50.9121	62.1763	28.1074	15.5234	31.7016
Os02G0697400	4-coumarate:coenzyme A ligase, Flavonoid biosynthesis	0	0	0	-4.5424	0	0.625104	22.9367	16.9423	0.916865	62.962	6.48045	24.942	7.26663	22.4125	35.0154
Os02G0698000	Similar to Phosphoribulokinase, chloroplast precursor (EC 2.7.1.19) (Phosphopentokinase) (PRKase) (PRK).	0	-1.0889	0	0	0	220.494	168.373	546.254	36.5661	364.763	245.004	357.193	370.749	47.5727	562.763
Os02G0704000	Carotenoid oxygenase family protein	0	-1.2191	0	0	0	10.4616	24.0424	107.961	2.15192	44.758	19.281	55.8214	56.0116	1.4271	73.0925
Os02G0710102	Hypothetical conserved gene.	0	0	0	-1.8821	0	68.3265	45.6678	48.5452	51.8397	20.2396	61.2942	81.165	38.8057	200.463	53.7136
Os02G0711400	Conserved hypothetical protein.	0	0	0	1.2288	0	11.1613	75.5082	46.2647	98.4863	43.2788	10.8948	42.4412	54.6955	44.0812	37.5822
Os02G0718100	Non-protein coding transcript.	0	0	0	1.0646	0	3.72916	3.76316	113.761	317.14	52.3971	3.84075	4.50431	50.5727	159.069	110.942
Os02G0718600	Conserved hypothetical protein.	0	0	0	2.053	0	1.32892	86.9469	79.5536	390.064	103.603	1.33595	42.3973	75.4838	98.6104	128.627
Os02G0720900	Peptidase A1 domain containing protein.	0	1.803	0	0	0	10.7359	40.3229	13.8753	32.3963	22.6835	11.3506	11.5248	22.2796	46.2991	12.5258
Os02G0726700	Helix-loop-helix DNA-binding domain containing protein.	0	0	0	-1.6109	0	0.499463	0.448815	2.62582	11.0063	11.0534	0.368209	0.326321	4.92301	35.2671	17.4709
Os02G0731900	Similar to 3-ketoacyl-CoA synthase.	0	0	0	-1.2549	0	12.8661	71.7207	58.9439	17.5094	35.1568	15.5043	39.0947	65.0959	43.8368	63.9938
Os02G0734300	Similar to Nudix hydrolase 18, mitochondrial precursor	0	0	-1.491	0	0	33.1402	52.1319	78.9846	111.672	65.5393	34.172	34.3235	202.471	102.778	75.6126
Os02G0739000	DEAD-like helicase, N-terminal domain containing protein.	0	-1.0029	0	0	0	169.379	86.2523	47.8146	59.5076	76.6759	157.449	172.386	49.5991	78.0138	70.058
Os02G0739100	Similar to Formin-like protein 16.	0	1.2959	-2.3674	0	0	10.1054	35.0939	9.28981	16.9012	6.61654	10.3025	14.2545	43.7144	15.8377	6.92855
Os02G0739400	Similar to Avr9/Cf-9 rapidly elicited protein 231 precursor.	0	1.7333	-1.5874	0	0	1.48558	28.5656	10.6239	13.6503	8.79466	3.12407	8.56823	29.1137	18.6237	13.3856
Os02G0739600	Similar to Pyruvate dehydrogenase E1 component alpha subunit, mitochondrial precursor	0	0	0	1.2539	0	35.3039	68.7934	121.074	51.1725	59.2068	49.8734	93.1959	87.7252	22.5097	123.312
Os02G0741500	Ribbon-helix-helix domain containing protein.	0	-1.5761	0	0	0	10.9177	6.86221	6.89485	2.57458	4.25735	11.0375	20.4047	3.56373	2.61847	14.2456
Os02G0748300	Similar to VMP3 protein.	0	0	-2.6231	0	0	8.55281	38.9159	18.2743	30.6254	16.4875	8.85611	16.0084	102.669	14.1991	29.0559
Os02G0755000	Putative methyltransferase, Pectin synthesis and methylesterification, Root development, Cellular adhesion	0	1.5803	0	0	0	2.56161	17.4781	3.76079	9.97917	1.24593	3.43966	5.82918	6.45994	3.03845	0.98314
Os02G0759400	Zinc finger, RING/FYVE/PHD-type domain containing protein.	0	0	-3.9841	0	0	0.226704	24.1989	10.8411	4.57542	12.2613	0.348184	10.5092	156.449	3.928	20.7385
Os02G0764700	Similar to Ethylene-responsive transcription factor 4	0	2.8933	-6.5656	0	0	0.43126	21.4902	0.448327	1.06268	0.152949	1.72211	2.8847	38.7251	1.03576	0.173792
Os02G0766700	bZIP transcription factor, Regulation of ABA signaling and biosynthesis, Drought resistance	0	0	-1.5035	0	0	26.3782	34.5771	13.6046	25.0812	54.7966	15.1263	18.6658	35.1764	28.8112	44.1669
Os02G0768750	Hypothetical conserved gene.	0	-1.4559	0	0	-1.5189	19.3393	12.0872	15.3103	4.89589	6.37276	17.073	33.0686	6.69914	5.04181	20.0463
Os02G0771600	Similar to 1-aminocyclopropane-1-carboxylate oxidase (Fragment)	0	0	0	1.6559	0	21.2096	78.2777	25.9558	77.1181	10.8151	16.4971	45.7374	18.1473	25.6726	11.8609
Os02G0775600	Zinc finger, C2H2-like domain containing protein	0	1.4084	0	0	0	29.1531	69.4299	44.5909	35.5144	21.737	33.7926	26.0851	61.9818	52.69	27.0581
Os02G0777800	Protein kinase, catalytic domain domain containing protein.	0	0	0	-1.1235	0	11.9799	44.9162	23.5004	18.1001	7.13882	21.8343	23.3342	23.8611	41.3689	10.5122
Os02G0787300	Mitogen-activated protein kinase kinase 4,	0	0	-1.6705	1.0687	0	31.9906	24.6814	15.7123	64.4762	7.71208	14.2903	15.352	45.6135	32.2464	9.04392
Os02G0791700	Similar to STE20/SPS1-related proline-alanine-rich protein kinase.	-2.3981	-2.0199	0	-2.8008	0	3.22401	4.92503	2.70043	2.08823	7.47794	16.9642	19.9204	7.54049	15.265	14.2656
Os02G0797600	Conserved hypothetical protein.	0	1.0117	0	0	0	87.35	177.836	170.422	153.388	227.368	112.951	87.9634	299.119	110.206	170.678
Os02G0802700	Similar to MGDG synthase type A.	0	0	-1.7564	0	0	3.3169	16.8314	9.94464	9.47824	10.1721	4.45899	4.95333	30.6399	7.27002	11.4167
Os02G0806350	Hypothetical protein.	0	0	-1.9594	0	0	5.25571	8.786	4.34521	6.71377	3.02655	4.56858	4.75369	15.4107	4.23853	3.60276
Os02G0814000	Protein of unknown function DUF862	0	1.5353	-1.8227	0	0	7.52639	49.582	20.4069	28.5381	147.745	8.81819	17.0601	65.8322	31.2644	178.126
Os02G0814400	Cytochrome c, monohaem domain containing protein.	0	0	0	0	1.2517	323.535	199.108	154.303	116.411	110.868	266.452	220.455	108.604	178.921	51.1044
Os02G0817900	Cytochrome P450 family protein.	0	-1.1378	0	0	0	14.4906	15.5168	3.57054	8.70388	11.2368	21.9978	34.0512	2.59466	9.2241	13.031
Os02G0822600	Similar to 50S ribosomal protein L9.	0	0	0	0	1.37	325.238	297.263	119.023	109.407	114.783	307.148	317.672	73.7819	143.221	48.7435
Os02G0823100	Similar to Plasma membrane intrinsic protein (Plasma membrane integral protein ZmPIP1-5)	-2.6271	0	0	0	0	14.2304	166.528	179.34	167.69	837.237	87.7593	181.628	239.729	171.773	1101.22
Os02G0823900	Hypothetical conserved gene	0	0	1.4952	0	0	2.08776	3.25595	43.1257	3.02879	31.1656	1.0494	1.53526	13.9513	3.51643	35.8972
Os02G0832400	Similar to Callose synthase 1 catalytic subunit.	0	-1.559	0	0	-1.8246	15.8781	15.6875	17.6751	6.34781	4.88376	17.0921	46.0988	6.80759	3.61579	18.9884
Os03G0101700	Similar to SNF2P.	0	-1.6325	0	0	0	51.1193	16.7757	18.4478	9.18168	11.7153	56.1156	51.8738	14.723	10.0839	14.9147
Os03G0103200	Similar to Physical impedance induced protein.	1.7927	-2.4286	1.1684	1.3962	0	172.151	168.466	1638.3	1302.26	1322.18	49.6003	904.523	664.743	519.04	1790.05
Os03G0103300	Hybrid proline- or glycine-rich protein, Controll of low-temperature germinability, Pre-harvest sprouting resistance	0	0	0	1.3367	0	49.7824	242.417	578.803	1301.85	468.114	82.2445	436.319	376	540.725	984.53
Os03G0103700	Non-protein coding transcript.	0	-1.8232	0	0	0	20.4888	15.055	15.1513	6.54322	4.77565	19.2213	53.1309	5.55777	4.6744	16.5135
Os03G0107700	Similar to EL2 protein	0	2.5547	0	0	0	10.6427	84.8039	34.2364	80.5162	19.2883	12.2176	14.3949	73.6054	64.149	22.3894
Os03G0108600	Similar to DEAD-box ATP-dependent RNA helicase 50.	0	-1.2143	0	0	0	196.035	66.0318	31.5409	36.9544	24.6997	140.126	152.803	19.3654	39.281	20.589
Os03G0119300	Peptidase S8, subtilisin-related domain containing protein.	0	1.6502	-3.6475	0	0	0.427478	21.9385	4.92943	3.18663	21.3767	1.80743	6.97052	56.3338	4.81416	29.8734
Os03G0122300	Similar to Flavanone 3-hydroxylase-like protein	0	0	0	1.1989	-2.5271	8.38236	116.359	138.722	295.801	46.2086	2.79871	61.3421	131.868	135.172	292.367
Os03G0124300	Similar to ATP binding protein.	0	0	-1.0128	0	0	89.4804	64.421	42.2882	48.7494	37.4145	56.5256	58.9689	77.8171	42.8663	54.5611
Os03G0124500	Conserved hypothetical protein.	2.3187	0	0	0	0	66.4286	5.58163	10.5418	15.5894	23.2228	13.2923	9.92017	12.7887	6.44679	17.5916
Os03G0125600	Ser Thr specific protein kinase-like protein	0	0	-1.4352	0	0	50.5516	53.5183	26.9361	52.8119	16.7493	35.954	54.2438	66.4281	47.4931	22.0397
Os03G0128200	Similar to predicted protein.	0	-1.1879	1.5333	0	-2.2024	20.7902	29.1526	29.101	4.43489	7.65143	22.3473	66.2377	9.16861	6.59512	38.6551
Os03G0129100	Seven transmembrane protein MLO2	0	1.263	-1.1955	0	0	28.1	113.974	23.2338	84.7237	13.5234	39.7752	47.3613	48.5272	127.7	17.7497
Os03G0129400	Conserved hypothetical protein.	0	1.4319	0	0	0	202.37	102.136	430.94	115.25	86.9592	135.328	37.7542	605.515	131.134	75.3381
Os03G0130300	Similar to Cp-thionin.	0	0	0	1.6766	0	1.3388	107.578	138.492	84.7451	33.1507	3.3647	77.3597	75.74	27.8112	38.7474
Os03G0133000	NAC transcription factor, Drought and salt stress tolerance, Modulation of ABA-mediated pathway	0	0	0	-1.5912	0	5.92459	4.29271	11.5683	11.6429	15.896	11.4414	1.44253	30.941	36.8013	11.5847
Os03G0138700	TGF-beta receptor, type I/II extracellular region family protein.	-1.092	0	0	0	0	40.0022	152.32	71.7362	62.2703	10.1142	85.1238	82.1392	62.7099	111.186	13.0867
Os03G0140100	Cytochrome P450 family protein.	0	0	0	-1.0099	0	48.9361	182.896	33.5229	31.6057	15.2983	65.9865	98.4021	27.3648	66.7676	22.9141
Os03G0141200	Similar to Beta-amylase PCT-BMYI (EC 3.2.1.2).	0	0	-1.2244	0	0	17.2666	32.8255	59.9586	29.7426	221.838	20.2402	29.1505	127.764	24.8292	153.49
Os03G0151800	Similar to Cell division control protein 48 homolog A (AtCDC48a).	0	1.2016	0	0	0	25.3133	40.0663	26.5826	83.4561	40.9873	26.6173	17.373	35.3462	79.6614	27.1006
Os03G0152000	Heavy metal transport/detoxification protein domain containing protein.	0	1.7766	0	0	0	4.81743	29.9929	5.918	18.9668	3.53318	4.91342	8.73076	22.1126	27.2	4.82514
Os03G0157900	Phosphoserine aminotransferase, chloroplast precursor	0	0	0	1.6918	0	24.1012	33.2222	50.5084	110.529	23.5026	22.8639	36.301	23.921	35.8916	41.6795
Os03G0159900	Hypothetical conserved gene	0	0	-1.1362	0	0	196.891	209.032	173.561	788.586	171.522	183.662	191.513	347.896	859.017	110.779
Os03G0165900	Tetratricopeptide-like helical domain containing protein.	0	0	0	-3.1147	0	8.56394	20.1622	8.34199	2.4342	16.3559	7.98981	6.00727	5.7317	22.1193	3.98706
Os03G0168200	Similar to F16A14.21.	0	0	0	1.2031	0	56.3549	39.4264	37.1761	74.5438	64.6004	60.1816	55.2234	25.3584	33.9649	58.9729
Os03G0170900	Sucrose transporter.	0	0	0	1.609	0	56.2284	141.366	102.526	239.974	74.4833	58.495	95.3174	74.901	82.5268	56.4224
Os03G0171600	F-box protein containing a Kelch repeat motif, Reguration of leaf senescence, seed size and grain number	0	0	-1.1347	0	0	23.1552	91.2922	61.6723	72.9385	49.2343	27.1815	55.2642	123.496	46.623	67.0566
Os03G0177500	EF-1 alpha	0	0	0	0	-1.1935	228.57	195.045	170.635	186.515	68.8187	210.455	289.712	133.912	142.546	172.76
Os03G0180800	TIFY domain-containing transcriptional regulator, Salt and dehydration stress tolerance	0	4.8014	-3.5633	0	0	0.0632653	29.717	1.80395	1.95981	0.471187	0	1.06287	19.4473	1.75822	1.68268
Os03G0180900	Tify domain containing protein.	0	1.9785	0	0	0	0.707888	58.7433	25.8091	20.5581	7.09236	0.761048	14.8659	42.3767	30.056	26.435
Os03G0181100	Tify domain containing protein.	0	4.1428	-3.2301	0	0	1.17849	450.548	22.5116	33.6545	11.1281	0.882365	25.4361	192.634	23.0473	12.9414
Os03G0183200	Similar to AP2 domain containing protein, expressed.	0	0	0	2.1125	0	16.96	33.5655	59.515	307.128	11.4409	23.9266	40.7163	87.7027	74.507	15.6422
Os03G0183500	Protein of unknown function DUF581 family protein	0	4.341	-3.1101	0	0	0.796765	107.159	2.90442	1.1729	1.77253	0.266992	5.27322	22.8705	2.08756	0.525414
Os03G0184300	Conserved hypothetical protein. (Os03t0184300-01);Glycosyl transferase, family 8 protein	0	0	0	1.7848	0	5.03465	18.8287	4.4084	17.9073	1.54818	3.48632	7.30667	3.57344	5.45177	1.12587
Os03G0188500	Glutelin family protein.	0	1.2418	-2.1974	0	0	4.58045	223.487	38.774	85.3839	28.0224	3.93315	94.2478	162.173	72.0058	49.4188
Os03G0189100	Uncharacterised protein family UPF0503 domain containing protein.	0	0	-1.2211	0	0	36.5009	55.3542	55.9841	62.5084	49.66	32.9542	23.8822	119.022	54.7056	51.6817
Os03G0189400	Similar to Alcohol dehydrogenase ADH.	0	0	0	1.5072	0	9.32094	17.1703	67.5242	64.0806	24.9417	5.41129	23.0977	65.0896	23.6494	39.215
Os03G0192700	Similar to Myo-inositol-1-phosphate synthase.	0	0	0	0	-1.1406	5.9558	8.02498	25.5895	10.5068	31.6111	5.61451	13.4818	14.6102	3.98118	76.5002
Os03G0196800	Similar to Cyanelle 30S ribosomal protein S10.	0	0	0	0	1.1058	425.449	352.901	122.378	211.764	144.07	357.632	350.394	114.37	247.645	73.479
Os03G0200200	Conserved hypothetical protein.	0	0	0	1.7647	0	5.97039	31.596	9.5413	45.0034	5.52375	4.18614	23.1378	4.71606	13.8938	7.32259
Os03G0218300	Conserved hypothetical protein.	0	-1.655	0	0	0	15.531	6.23926	10.2512	2.81235	5.13417	12.8101	19.5963	4.80488	3.94719	13.3933
Os03G0219900	Similar to 50S ribosomal protein L15, chloroplast precursor (CL15)	0	0	0	0	1.3737	246.04	157.645	85.857	70.0337	102.517	193.026	181.763	52.2583	94.8465	43.4231
Os03G0223100	Cytochrome P450 family protein.	0	-1.6811	0	0	0	31.8435	6.36349	8.27713	9.98183	13.4551	30.7558	20.3515	4.95499	10.5006	23.5635
Os03G0225900	Allene oxide synthase (CYP74A2), Biosynthesis of jasmonic acid (JA)	0	0	0	1.0458	-2.0371	0.240229	0.0280349	31.6502	116.579	8.25211	0.0632497	0	24.9111	59.2384	37.1748
Os03G0235000	Similar to Peroxidase	0	1.7027	0	3.1933	0	2.56919	42.9399	5.50672	512.868	2.8813	5.37495	13.1563	5.74216	58.8216	3.07807
Os03G0241900	Similar to Senescence-associated protein 12.	0	1.8624	-3.4538	0	0	9.80503	68.2672	15.9173	14.6393	13.5499	13.8647	18.7238	159.05	15.5445	19.0753
Os03G0249100	Conserved hypothetical protein.	0	0	-1.5951	0	0	3.35606	14.4827	10.1416	6.06105	10.4405	6.31976	6.1626	27.9419	7.5471	18.1405
Os03G0252100	Alpha/beta hydrolase fold-3 domain containing protein.	0	0	0	-2.1816	0	2.84186	20.9256	46.6564	3.97414	47.3015	5.56048	15.2607	35.835	18.9132	58.6423
Os03G0261800	Protein of unknown function DUF3049 domain containing protein.	0	0	0	1.4337	0	9.12917	10.4275	8.85456	32.762	23.5093	12.2095	10.3304	13.3618	12.7229	38.222
Os03G0264400	Anthranilate synthase alpha 2 subunit.	0	0	0	1.1727	0	20.47	22.721	38.3069	72.1443	9.73403	21.683	19.277	29.9547	33.5732	17.0902
Os03G0270000	Protein of unknown function DUF296 domain containing protein.	0	0	0	1.7517	0	3.46173	10.5927	28.0231	68.2412	5.61841	2.70341	13.1978	15.7323	21.2582	12.3425
Os03G0272900	DVL family protein.	1.0859	0	-1.239	0	0	103.97	34.5121	59.508	42.1054	71.6262	48.8939	46.0869	128.092	32.6732	58.1513
Os03G0273800	HAD-superfamily hydrolase, subfamily IA, variant 3 domain containing protein	0	1.7173	0	0	0	5.53207	31.8807	357.921	220.232	248.441	7.6468	9.66955	358.461	240.915	233.029
Os03G0278900	ATPase, F0 complex, subunit B/B', bacterial and chloroplast family protein.	0	0	0	0	1.1114	1268.91	1473.06	1444.15	1054.88	2040.66	1478.24	1157.6	1558.29	1271.11	1036.71
Os03G0280400	Similar to plant-specific domain TIGR01589 family protein.	2.3491	0	0	0	3.0533	191.677	6.05977	29.7037	7.41468	59.7296	37.5544	26.9249	20.3483	9.89765	7.89779
Os03G0284900	Annexin repeat, conserved site domain containing protein.	0	-1.0536	0	0	0	39.7024	20.8057	11.1101	12.9009	2.20601	42.6538	43.071	8.35528	15.1408	4.15515
Os03G0285300	Conserved hypothetical protein.	2.1901	0	0	0	0	121.923	14.7634	33.0241	173.151	10.0322	26.6704	15.4011	63.3374	177.392	21.0044
Os03G0285800	MAP Kinase.	0	1.7903	-1.6969	0	0	6.95438	46.7766	32.674	89.116	12.0598	6.24209	13.4875	96.6036	75.579	14.595
Os03G0290300	Similar to W-3 fatty acid desaturase	0	2.5392	0	0	0	1.90081	47.0653	381.267	18.5969	201.822	2.71803	8.0753	487.551	12.2788	230.857
Os03G0291500	Asparagine synthetase, Biosynthesis of asparagine following the supply of ammonium	0	0	0	0	-1.7589	5.38349	0.764834	68.7488	4.75831	4.85624	0.889735	0.873856	51.7383	5.72193	18.0397
Os03G0292100	Hypothetical conserved gene.	0	0	-1.5763	0	0	14.7944	43.6024	28.3857	39.2283	27.2295	19.4406	25.8951	77.1964	44.418	23.1045
Os03G0297600	Streptomyces cyclase/dehydrase family protein.	0	0	0	1.1153	0	10.7737	45.3735	100.179	92.5537	21.5004	14.8664	32.1989	74.3262	44.8173	23.9804
Os03G0300400	Pathogen-related protein (JIOsPR10).	0	0	0	1.7226	0	2.68176	140.755	186.523	212.039	22.1924	2.12804	83.5729	93.8348	67.3983	38.7857
Os03G0301200	COBRA-like protein 7 precursor.	0	2.1873	0	0	0	0.142347	12.2563	1.64892	1.66361	0.999589	0.445993	2.68376	9.20311	1.11354	1.72092
Os03G0302200	Zinc finger, RING/FYVE/PHD-type domain containing protein.	0	0	-1.3671	0	0	17.5178	49.976	22.7438	35.2881	16.7705	17.7785	25.4797	53.503	26.8878	21.5982
Os03G0307000	Conserved hypothetical protein.	0	0	-2.0547	0	0	27.3069	46.1943	32.8484	35.7665	34.9249	23.0666	25.7523	124.455	40.6966	53.9671
Os03G0315400	Similar to Typical P-type R2R3 Myb protein	0	0	-2.4619	0	0	2.75326	37.6488	3.16444	13.3721	0.89155	2.6107	17.8765	15.8987	4.23036	1.06129
Os03G0316200	Similar to Galactinol synthase (Fragment	0	1.1113	0	0	0	3.1292	86.8745	43.1981	25.0886	36.6728	3.14182	40.1042	41.0021	40.1409	43.2137
Os03G0323600	Similar to DnaJ domain containing protein, expressed	0	0	0	1.1641	0	176.94	92.2363	122.563	423.526	83.6861	132.214	110.18	137.014	198.262	127.318
Os03G0327600	Ricin B-related lectin domain containing protein.	0	0	0	1.6908	0	19.8333	119.815	30.6791	86.0027	28.3336	25.7036	101.674	16.4428	27.9456	28.1387
Os03G0327800	NAC Family transcriptional activator, Abiotic stress response, Positive regulator of leaf senescence	0	0	0	1.8409	0	5.8792	5.01287	10.3793	34.8725	16.9284	3.14907	6.51622	6.69114	10.2119	14.9559
Os03G0329700	Similar to predicted protein.	0	-1.012	0	0	0	49.8166	20.9251	21.6479	46.5453	23.5328	50.9978	42.0862	18.149	39.271	36.9874
Os03G0331600	Uncharacterised protein family Ycf54 domain containing protein.	0	0	0	0	1.2146	450.323	332.153	127.589	227.997	214.678	381.172	290.049	132.314	242.59	101.539
Os03G0331700	calmodulin-like protein 27	0	0	-1.1828	0	0	1.0833	11.2832	37.8073	28.3888	24.2366	1.80244	5.70147	78.2729	15.1151	26.2905
Os03G0337500	Similar to Potassium transporter.	0	-1.6996	0	0	0	10.8239	5.55617	19.094	1.01262	10.6344	7.81772	17.9978	12.7473	3.48785	20.6502
Os03G0348200	Terpene synthase-like domain containing protein.	-2.4025	0	0	0	0	3.44218	19.2681	62.1108	8.53703	113.825	18.1669	6.20645	67.7649	10.9109	167.404
Os03G0355900	Hypothetical conserved gene	0	0	0	0	1.1347	21.8265	32.6529	137.313	17.9586	678.776	28.1103	20.6172	199.232	19.218	339.328
Os03G0365200	Similar to Ulp1 protease family, C-terminal catalytic domain containing protein.	0	0	0	-5.4142	0	6.72142	3.67526	3.94451	0	5.55578	6.97642	4.53643	5.25222	6.02567	4.77654
Os03G0371300	Similar to Cytochrome P450 CYP709E4.	0	-2.2707	0	0	0	36.5516	11.2612	36.0129	2.94099	29.334	45.0386	54.1948	23.4659	7.09455	24.9145
Os03G0388900	Peptidase C14, caspase catalytic domain containing protein	-1.323	0	0	1.1485	0	26.929	124.339	89.3359	112.716	55.6424	67.2534	76.3739	115.911	53.3384	72.0326
Os03G0399800	Mannose-binding lectin domain containing protein.	-3.698	0	1.2157	-4.442	0	8.55175	557.576	136.266	32.4648	395.084	110.791	383.281	53.5049	740.259	285.836
Os03G0402800	Tify domain containing protein.	0	1.5819	-1.901	0	0	37.8645	231.359	99.0897	111.492	63.0009	37.6331	77.0757	337.489	64.5012	70.6662
Os03G0425000	Similar to predicted protein.	0	-1.0521	0	0	0	72.6424	35.9123	10.0258	11.6616	10.9551	67.9034	74.2632	5.48451	19.6911	8.51519
Os03G0559700	Conserved hypothetical protein.	0	0	0	-1.096	0	33.9582	77.7636	31.1695	45.8233	23.8361	63.9621	39.1784	37.4924	102.756	27.8763
Os03G0563400	Similar to HAT family dimerisation domain containing protein.	0	0	5.0142	0	0	0.0341573	0	8.82655	0.0721439	0	0	0	0	0	0
Os03G0583700	Similar to Proteasome maturation factor UMP1 family protein.	0	0	5.1472	0	0	0	0	33.858	0	0	0	0	0	0	0
Os03G0593200	Similar to CBS domain containing protein, expressed.	0	-1.3985	0	0	0	15.7416	9.40137	9.66548	5.71826	8.89502	15.1155	24.7177	5.94468	4.76553	13.6895
Os03G0597200	Pentatricopeptide repeat protein, Chloroplast development	0	-1.3493	0	0	0	29.371	11.6259	5.70296	7.80758	5.98006	20.192	29.5421	3.85891	9.17488	6.44329
Os03G0597600	Similar to L-asparaginase (EC 3.5.1.1) (L-asparagine amidohydrolase)	0	0	0	1.6884	0	3.86148	7.25525	3.39167	51.8091	6.22143	3.30422	4.37641	15.0678	16.8638	21.6969
Os03G0621400	Hypothetical conserved gene.	0	3.6865	0	0	0	6.31085	8.79093	3.05547	7.21676	3.88124	1.51271	0.68095	0.182826	0.187739	0.352813
Os03G0641700	Similar to predicted protein.	0	0	0	0	1.0258	174.107	127.951	73.5956	240.327	115.769	133.207	88.3028	87.1884	282.023	62.4104
Os03G0643300	Ornithine delta-aminotransferase, Abiotic stress tolerance	0	0	0	1.3086	0	58.693	65.2715	39.8741	59.0154	47.837	27.2142	32.1659	19.7524	24.9947	42.1345
Os03G0648400	Similar to DnaJ protein.	0	-1.2136	0	0	-1.1831	230.708	119.752	202.598	157.402	87.6278	260.987	276.975	220.485	219.336	218.404
Os03G0655400	Similar to LIP5	-1.3073	-1.5596	-1.2591	0	0	561.919	1130.13	1147.04	1181.84	1512.67	1388.21	3322.34	2503.71	1805.16	1855.22
Os03G0659900	Similar to S3 self-incompatibility locus-linked pollen 3.15 protein.	-1.7107	-2.4929	0	-1.051	0	21.5704	22.7996	25.334	19.7268	18.0448	70.4812	127.994	32.8035	42.8795	29.1965
Os03G0660000	Conserved hypothetical protein.	-7.4056	-10.603	0	-5.9292	0	0.298994	0.0814164	0.177615	0	0	50.605	126.324	10.7393	47.4968	7.22944
Os03G0660050	Non-protein coding transcript.	-8.7048	-7.4873	0	-4.809	0	0.107344	0	0	0	0	44.7111	146.877	11.1184	23.5341	6.05614
Os03G0661800	PDZ/DHR/GLGF domain containing protein.	-5.5204	-5.5165	0	-8.3977	-5.0062	0	0	0	0.0190025	0	9.45148	9.42173	4.28365	6.72316	6.93949
Os03G0663400	Similar to Thaumatin-like protein.	0	0	1.8098	0	0	1.86419	5.77419	39.659	31.2255	23.3054	2.43365	7.75722	10.3162	10.3936	12.3329
Os03G0667100	;Ankyrin domain containing protein.	0	0	-3.085	0	-2.1969	2.9609	2.99373	4.67118	12.798	2.24653	2.66141	3.87351	36.1461	25.8801	11.3061
Os03G0668000	Cyclin-like F-box domain containing protein.	0	-2.9395	0	0	0	1.97824	1.50829	2.05652	2.34446	1.19271	9.96555	11.5399	5.83859	9.23078	7.38743
Os03G0676400	VQ domain containing protein.	0	0	0	1.9813	0	0.392681	12.7511	8.13527	71.88	1.14895	0.0904651	0.824644	23.1246	19.0979	2.29456
Os03G0680200	Ankyrin repeat domain containing protein.	-1.5147	0	0	0	0	14.1872	37.9528	15.5591	23.6354	10.8926	40.4663	57.235	23.9184	40.6529	29.7383
Os03G0682100	Similar to nitrate and chloride transporter.	0	0	0	0	-1.0096	3.95284	3.39756	20.1227	15.4151	27.9039	5.03627	4.07435	20.8733	20.4848	61.6677
Os03G0686300	Similar to unconventional myosin heavy chain.	0	0	0	0	-1.2098	4.84053	6.80682	9.36677	2.09391	4.18932	4.92664	13.1379	4.00309	1.99542	10.6365
Os03G0701200	Similar to Sugar-starvation induced protein (Fragment).	0	0	-1.4985	0	0	5.78098	13.887	40.5978	7.29379	25.7602	3.69215	4.00669	104.61	5.89146	27.6792
Os03G0705800	Protein of unknown function DUF3049 domain containing protein.	0	0	0	1.6792	0	2.95178	10.834	7.85363	30.1772	9.95261	4.67397	4.15196	15.9746	9.88508	9.54975
Os03G0709300	Similar to Chemocyanin precursor (Basic blue protein)	0	1.939	0	0	0	1.30785	43.8039	28.2798	22.7738	3.89623	0.160693	11.393	27.3113	8.07702	5.76238
Os03G0710800	14-3-3-like protein S94.	0	1.1285	0	0	0	30.2857	61.054	67.5408	109.163	87.2931	34.6931	27.8507	89.6373	122.913	57.1803
Os03G0711100	Member of the CONSTANS-like (COL) family, Flowering time repressor	0	0	0	0	1.1686	22.989	8.16894	80.7021	22.3735	84.0563	16.6591	8.503	129.753	22.637	41.044
Os03G0712700	Cytosolic phosphoglucomutase	0	0	0	0	-1.0451	69.4944	83.5156	89.0104	34.3226	66.9731	75.7996	142.885	66.4331	20.613	151.699
Os03G0718800	Similar to Physical impedance induced protein	0	1.0168	0	1.074	0	11.5862	403.402	95.341	118.216	33.5267	15.449	198.83	91.0614	58.9057	27.0949
Os03G0729000	Similar to Peptidase, M50 family.	0	0	0	0	2.2529	1.95017	1.5121	3.74054	1.7686	105.153	1.15746	1.88189	4.55566	1.93927	24.2163
Os03G0735000	Similar to Glucose-1-phosphate adenylyltransferase large subunit 2 (EC 2.7.7.27) (ADP-glucose synthase) (ADP-glucose pyrophosphorylase) (AGPASE S) (Alpha-D-glucose-1-phosphate adenyl transferase) (BLPL	0	-1.1458	0	0	0	44.9532	36.603	37.493	12.9409	24.1738	52.0732	80.7741	22.8475	10.2879	37.0957
Os03G0739700	Uncharacterised protein family UPF0114 domain containing protein.	0	0	0	2.5037	0	0.353398	8.86698	18.6241	49.7254	10.367	0.511752	2.0733	19.6516	9.19776	9.80629
Os03G0741100	Basic helix-loop-helix transcription factor, Drought tolerance	0	2.9538	-2.4829	0	0	22.0113	171.659	26.4807	62.0652	31.1472	31.3708	22.0967	135.002	95.7044	17.5619
Os03G0761100	Protein phosphatase 2C-like protein.	0	1.1725	-1.3511	0	0	21.429	56.0238	44.4241	115.796	51.3946	19.9669	24.7875	103.347	71.6132	48.5453
Os03G0764100	Zinc finger transcription factor ZF1	0	1.9905	-1.0471	0	0	6.84511	65.7145	51.1596	94.292	25.0106	8.06818	16.4922	96.4041	60.1887	26.9007
Os03G0769100	Similar to 9S ribosomal protein.	0	0	0	0	1.2488	388.251	362.515	109.294	187.657	173.666	350.891	296.055	83.3314	240.9	80.2141
Os03G0772600	Similar to Lectin-like receptor kinase 7;2.	0	0	0	0	-2.0802	4.40639	1.91307	25.1233	31.7385	6.42588	3.15189	3.01981	20.025	19.601	29.8272
Os03G0782200	Hypothetical protein.	0	0	0	0	-1.2765	0	0.343163	105.557	0.110906	33.0743	0.145165	0.196039	90.9691	0	87.9441
Os03G0784600	Conserved hypothetical protein.	0	0	0	0	-1.6837	17.5881	22.4536	28.6983	9.05918	7.97945	16.0673	29.5272	12.3065	9.91381	28.1364
Os03G0796600	Protein of unknown function DUF506, plant family protein	0	1.3774	0	0	0	24.8791	48.7772	65.233	29.4041	69.3304	30.0969	18.7249	47.2672	31.438	66.3846
Os03G0799000	Similar to Histone H1.	0	0	1.3045	0	0	57.0702	55.4588	84.8677	80.9577	50.2155	66.9576	56.0003	31.3335	82.9106	45.5022
Os03G0802200	Non-protein coding transcript.	0	0	0	2.3317	0	1.1155	31.3471	12.2259	69.9746	10.0883	2.26147	24.6752	8.85191	14.5819	13.7556
Os03G0802500	ATPase, AAA-type, core domain containing protein.	0	0	0	1.1506	0	1.97769	1.52746	10.6696	115.06	6.73345	0.86153	0.704789	15.1081	54.3702	13.7951
Os03G0803500	Similar to Prolyl 4-hydroxylase alpha-1 subunit-like protein.	0	0	0	1.7016	0	0.822903	5.13778	7.12309	93.9794	7.62974	1.84162	3.23681	7.31565	30.3111	8.2905
Os03G0806600	Conserved hypothetical protein.	0	0	0	1.941	0	12.9926	22.6747	68.4766	178.267	56.3159	16.1905	17.3631	51.119	48.7061	56.9993
Os03G0807400	Pentatricopeptide repeat domain containing protein.	0	-1.1975	0	0	0	41.5902	17.176	10.4294	10.0806	8.5475	32.6407	39.2846	7.19213	13.63	8.4886
Os03G0815100	Similar to OsNAC6 protein	0	1.7117	-1.9136	0	0	17.2688	228.193	70.2144	170.388	120.478	20.6267	69.4814	241.244	90.4377	97.55
Os03G0815200	Similar to Methylenetetrahydrofolate reductase (EC 1.5.1.20)	0	0	1.2535	1.4801	0	38.2109	89.3401	296.995	230.255	172.415	44.0147	126.824	113.598	86.5868	353.559
Os03G0815400	Ribosomal protein L17-like protein.	0	0	0	0	1.557	168.015	171.594	66.4137	91.1623	94.1605	154.957	145.943	48.4814	103.951	35.1267
Os03G0819600	Chalcone isomerase (EC 5.5.1.6).	0	0	0	-1.7563	0	82.5379	507.848	148.525	115.411	211.772	154.446	263.595	107.602	409.035	144.946
Os03G0823400	Similar to Bowman-Birk type trypsin inhibitor (WTI).	0	0	-1.125	0	0	103.239	145.294	84.4489	71.8927	22.0802	70.9722	80.1352	167.966	87.9108	19.383
Os03G0824100	Pentatricopeptide repeat protein, Regulation of chloroplast development	0	-1.2125	0	0	0	76.6359	24.7073	9.34821	19.366	3.6209	58.7132	57.103	5.87779	20.7278	4.70211
Os03G0826900	Conserved hypothetical protein.	3.4779	0	0	0	0	40.3579	0.374642	2.72435	4.30506	0.16265	3.61572	0.428045	0.893856	4.7205	0.20535
Os03G0835100	Similar to Chloroplast protein import component Toc159.	0	-1.1109	0	0	0	17.8361	17.9762	45.3978	12.0822	44.746	22.7332	38.7198	34.6959	14.7083	57.8084
Os03G0843400	Similar to 30S ribosomal protein S6, chloroplast precursor	0	0	0	0	1.2633	257.732	259.797	105.67	136.496	116.734	264.737	284.349	83.8177	158.077	53.3792
Os03G0843800	Methyl chloride transferase.	-1.6733	0	0	-3.7312	0	21.6322	34.8138	655.258	8.6181	658.093	68.875	31.3133	501.511	120.064	543.827
Os03G0850900	Similar to Chemocyanin precursor	0	2.3964	0	0	0	0.0863847	40.4355	7.23558	9.54841	0.367643	1.11446	7.65957	1.22668	1.51157	0.556991
Os03G0856500	Similar to Plastid-specific 30S ribosomal protein 1, chloroplast precursor (CS- S5) (CS5) (S22) (Ribosomal protein 1)	0	0	0	0	1.3127	996.653	697.571	508.369	482.232	54.0644	852.091	825.057	592.894	363.94	23.8902
Os03G0859700	Similar to RuBisCO subunit binding-protein alpha subunit, chloroplast precursor (60 kDa chaperonin alpha subunit) (CPN-60 alpha) (Fragment).	0	0	0	0	-2.31	11.7197	26.7014	11.3052	16.8049	9.26623	13.9704	31.4107	4.13135	7.41492	50.4352
Os03G0862100	Conserved hypothetical protein.	0	-1.4317	0	0	0	30.5419	15.4022	13.7188	7.97912	8.88864	22.7884	41.4371	7.43079	8.4918	17.8491
Os04G0116200	Protein of unknown function DUF827, plant family protein.	-7.5954	0	0	0	0	0.113779	1.11536	1.01384	0.881146	0.242114	21.9657	2.177	4.89456	3.27915	3.16375
Os04G0142400	Conserved hypothetical protein.	0	0	0	-1.174	0	5.40777	10.9642	134.516	103.805	123.462	9.66644	11.6758	171.162	245.719	195.083
Os04G0169100	Similar to Ethylene receptor-like protein 1.	0	0	0	1.3427	0	13.0438	10.9038	6.14988	22.6298	2.51702	11.78	13.3493	5.31183	9.36025	2.83379
Os04G0178300	Similar to Isoform 3 of Syn-copalyl diphosphate synthase.	0	0	1.5223	0	-1.6902	0.796522	0.067312	48.8505	59.7714	21.0992	0.430278	0.128178	15.5093	41.615	74.735
Os04G0178400	Similar to Cytochrome P450 CYP99A1	0	0	0	0	-2.4649	6.80929	5.68281	16.0051	26.6649	7.47985	9.0222	3.26361	8.23968	25.4212	45.3289
Os04G0188433	Similar to OSIGBa0102N07.2 protein.	0	2.18	0	2.0385	0	170.084	126.044	17.0695	277.499	16.4289	248.208	27.7403	33.8453	70.8638	25.5453
Os04G0191400	Conserved hypothetical protein.	0	0	-1.0833	1.0217	0	420.438	303.553	249.899	714.315	172.502	437.62	161.614	482.892	369.076	180.538
Os04G0191500	Conserved hypothetical protein	0	0	0	1.2123	0	497.391	559.793	537.561	1488.16	305.122	717.551	332.728	919.043	673.765	435.244
Os04G0196200	Winged helix repressor DNA-binding domain containing protein.	0	0	2.955	-2.5138	0	2.83978	227.007	20.1701	4.43325	8.3637	11.8329	206.509	2.37209	26.5611	12.804
Os04G0209300	Similar to Glutathione-conjugate transporter AtMRP4.	0	-1.6298	0	0	0	11.2187	3.93076	8.14055	9.08634	10.5618	9.96154	12.132	9.04067	8.84712	19.699
Os04G0218400	Similar to ankyrin protein kinase-like.	0	0	0	2.0437	0	22.5689	73.1402	13.6274	111.121	4.58136	15.735	28.4096	21.0844	28.2736	5.62454
Os04G0227500	DSBA oxidoreductase family protein.	0	1.0398	0	0	0	70.535	108.505	141.951	328.462	96.05	70.1011	52.6333	157.601	372.487	149.254
Os04G0282400	Similar to FPF1 protein-like (RAA1).	2.3375	0	0	0	0	2534.41	86.3885	144.839	1014.42	394.869	500.569	89.9514	240.352	1506.89	694.251
Os04G0301500	basic helix-loop-helix protein 006	0	4.0452	-6.1966	0	0	0.664508	90.8212	0.910953	0.5758	1.46842	0.094208	5.48654	60.9293	0.894434	0.576775
Os04G0320700	Similar to Glucosyltransferase (Fragment).	0	-2.365	0	0	0	3.99362	9.88413	48.6221	20.5446	28.4815	2.00405	50.7818	24.5733	15.7914	17.4004
Os04G0337201	Similar to OSIGBa0137O04.8 protein.	0	0	0	0	-1.3986	14.4747	13.1544	14.0086	7.79079	5.87336	13.2448	24.052	7.52222	4.84409	16.9971
Os04G0338100	Similar to IN2-2 protein.	0	0	0	-1.048	0	524.566	163.052	252.221	309.657	291.146	496.1	105.903	309.045	671.669	299.172
Os04G0364800	Barwin-related endoglucanase domain containing protein.	0	0	-1.1363	0	0	68.9196	118.9	151.151	140.972	30.6692	107.891	56.0224	303.005	238.214	57.1729
Os04G0367000	Hypothetical conserved gene	0	0	0	0	-1.8706	5.58336	3.06852	6.4616	9.10814	2.10092	10.6249	3.87664	5.22309	16.9138	8.43302
Os04G0369100	Similar to H0607F01.9 protein.	0	0	0	0	-3.3254	1.47528	0.185409	2.39318	3.00941	2.3746	0.209152	0.423676	4.61325	7.20317	26.1283
Os04G0369600	Similar to OSIGBa0107E14.3 protein.	0	0	0	0	-2.1568	0.283461	0.231561	15.2055	14.2092	5.48902	2.03746	0.105827	12.0283	14.2966	26.8672
Os04G0370900	Similar to H0607F01.5 protein.	0	0	0	0	-2.0443	21.9929	0.279044	15.0783	25.0294	9.61713	15.0608	0.58859	29.806	39.7844	43.5414
Os04G0372700	Similar to Quinone-oxidoreductase QR1 (Fragment).	0	0	-2.435	0	0	4.91097	101.919	31.5696	8.31446	63.1991	12.499	53.8033	155.687	8.78585	80.3875
Os04G0372750	Non-protein coding transcript.	0	1.8261	-2.8715	0	0	6.39119	96.4407	28.7972	10.5274	73.2608	11.8902	27.1248	192.19	14.1499	61.1334
Os04G0373400	Similar to MATE efflux family protein, expressed.	0	0	0	1.4894	0	21.1462	5.52126	19.1706	34.9342	13.9906	27.1022	12.6478	15.0643	13.0526	17.9063
Os04G0385900	Similar to OSIGBa0148P16.1 protein.	0	0	-1.4836	0	0	32.7772	52.8793	33.8743	163.484	25.7176	41.1003	25.2843	86.3876	95.1278	35.3441
Os04G0400000	Similar to OSIGBa0113L04.2 protein	-1.2275	1.5305	0	0	0	37.6795	69.569	12.0788	67.2359	2.20005	88.0755	24.0172	7.22876	81.0356	7.34528
Os04G0401000	Proline-rich protein, Blast resistance	1.5146	2.2892	2.199	2.406	4.3988	143.218	269.993	188.627	320.3	39.8286	50.0355	55.0875	37.4627	63.3975	2.07244
Os04G0401700	Potassium transporter, Potassium mediated growth, Salt tolerance	0	0	0	0	-2.2402	3.20978	2.73862	19.5124	13.9773	3.61749	1.44606	9.40918	10.2281	6.19163	18.7606
Os04G0402700	Hypothetical protein.	-8.7332	-6.287	-9.1996	-6.4164	-6.1926	0.116099	0	0.103451	0	0	49.3206	69.134	55.4713	77.5558	67.9337
Os04G0403200	Zinc finger, RING-type domain containing protein.	1.0264	0	0	0	0	85.3232	34.9746	47.5129	71.3204	52.8056	41.814	44.5801	44.8663	77.1862	28.5923
Os04G0403701	Similar to protein phosphatase 2C containing protein.	0	0	0	1.0098	0	16.6262	21.5678	102.658	41.2946	72.7806	16.0585	30.4293	103.585	21.5139	116.472
Os04G0405401	Hypothetical conserved gene.	9.587	6.1976	8.9375	5.9727	9.2999	44.5311	35.1993	28.1673	29.3644	29.0285	0.0577971	0	0.0523903	0	0.0505507
Os04G0405900	Similar to OSIGBa0142C11.2 protein.	0	0	1.1667	0	0	141.757	139.819	156.763	182.232	27.4982	134.347	122.797	63.6786	186.394	28.9738
Os04G0409200	Similar to H0321H01.10 protein.	0	-1.639	0	0	0	23.8728	18.8053	38.138	6.72291	55.6984	29.9344	58.4097	23.6444	4.73894	79.1624
Os04G0412000	Hypothetical protein.	-3.0617	0	0	-1.8225	0	3.67909	35.863	7.62483	9.19671	1.67134	30.6653	35.3805	18.9224	34.1246	2.76535
Os04G0412300	Similar to H0717B12.10 protein. (Os04t0412300-01);Glycoside hydrolase, family 17 protein.	0	0	-2.0297	0	0	5.56339	16.7438	8.25135	15.5127	8.80103	6.88061	7.41309	30.7261	16.275	7.49292
Os04G0416700	Harpin-induced 1 domain containing protein.	0	1.5081	0	0	0	19.2331	43.5755	14.753	29.667	13.8409	14.7409	15.2788	10.7103	13.6462	8.27744
Os04G0418500	Similar to photoperiod responsive protein.	0	0	-1.5629	0	0	15.1015	15.4449	11.5139	18.3339	9.74175	16.6922	12.1713	31.0228	22.6837	20.2538
Os04G0419100	Conserved hypothetical protein.	0	0	0	2.123	0	0.336483	57.1739	17.51	36.5294	2.00484	1.11626	24.8104	6.74559	8.7971	4.12219
Os04G0422600	Similar to H0525E10.16 protein.	-4.5961	-4.5885	0	0	0	0.369107	0.60305	0	1.09143	0.314175	8.91158	14.4692	1.78824	2.08957	0.386739
Os04G0423400	Similar to OSIGBa0076I14.3 protein.	3.9741	5.6916	4.4372	4.4588	5.3798	119.422	437.349	326.685	129.168	186.844	7.58563	8.43973	13.752	6.16213	4.92566
Os04G0429600	Putative cellulose synthase-like protein H3.	0	0	0	-4.2602	0	6.7709	2.0236	7.52937	0.310046	22.1099	12.1238	9.17115	18.5077	6.23271	23.426
Os04G0430700	Peptidase S8, subtilisin-related domain containing protein.	0	1.3794	0	0	0	3.69294	28.4617	12.1413	34.2477	2.95365	2.32349	10.9109	11.9773	18.9009	3.77697
Os04G0435500	Glutathione S-transferase, C-terminal-like domain containing protein.	0	1.4599	-2.4276	0	0	10.2691	35.4127	8.37381	24.0638	12.7403	10.4408	12.8385	41.0849	21.881	14.7208
Os04G0444900	Similar to Alfin-1.	0	0	0	0	1.384	13.7879	13.6617	25.4127	18.4917	155.624	12.6574	11.7435	44.8424	18.9406	65.4511
Os04G0447100	Similar to Lipoxygenase.	0	2.2707	0	0	0	2.12641	25.6785	9.02075	8.94987	5.65609	2.91797	5.30687	19.8471	6.68511	12.5184
Os04G0457000	Similar to Chlorophyll a/b-binding protein CP24,	0	0	-1.0391	0	0	4.7632	14.111	53.5908	8.28264	38.8335	12.745	2.94596	100.427	8.44693	21.0915
Os04G0463500	Similar to Anthranilate synthase beta chain.	0	1.4766	-1.099	0	0	54.4477	118.173	88.3125	180.976	54.5861	52.743	42.3489	172.509	96.824	77.0113
Os04G0464966	F-box-containing protein, Male meiotic DNA double-strand break repair, Regulation of meiotic progression	0	1.7648	0	0	0	4.37298	21.7159	5.43474	7.75084	4.73434	4.91347	6.37289	17.8473	8.68636	4.14285
Os04G0468600	Hypothetical conserved gene. (Os04t0468600-01);Heavy metal transport/detoxification protein domain containing protein	2.9074	0	0	0	-1.0419	23.39	1.73704	106.606	353.125	108.927	3.1121	1.10906	140.213	362.225	246.182
Os04G0469000	Heavy metal transport/detoxification protein domain containing protein.	0	0	-1.1283	0	0	6.89259	17.5766	93.122	155.022	64.8123	16.7373	9.82365	185.638	144.863	82.8784
Os04G0474300	Glycoside hydrolase, family 1 protein.	-5.3053	0	0	0	0	0.115484	0.188679	0.171507	0.0677542	0.102393	4.55833	0.215574	1.31835	1.03019	0.4809
Os04G0474800	Similar to OSIGBa0135C13.7 protein.	0	0	0	0	-1.2743	19.7448	158.359	173.128	128.041	55.9763	23.1944	108.512	138.794	114.019	148.614
Os04G0476100	Similar to Peroxisomal copper-containing amine oxidase.	0	0	-1.0867	0	0	87.4966	72.3379	66.9223	173.664	61.2052	95.6129	46.6363	129.617	138.415	65.4551
Os04G0483200	Steroid nuclear receptor, ligand-binding domain containing protein.	0	0	-2.8315	0	0	13.2149	30.6464	6.66897	15.3446	7.89641	12.2931	16.6891	43.2908	11.6682	7.19314
Os04G0489600	Hypothetical conserved gene. (Os04t0489600-01);Helix-loop-helix DNA-binding domain containing protein.	0	0	0	2.3807	0	1.32608	0.175667	4.18358	17.032	0.800785	0.198162	0.0334512	5.7779	3.43078	0.693267
Os04G0492800	Similar to H0425E08.6 protein.	0	1.2751	-1.5222	0	0	8.26307	73.2872	32.4835	23.7588	26.966	15.0371	30.2012	85.0883	46.3854	24.1769
Os04G0493100	Basic helix-loop-helix dimerisation region bHLH domain containing protein.	0	0	-2.2231	0	0	78.1285	38.8419	17.7891	38.7326	53.724	52.7567	17.1161	75.742	23.6861	49.2129
Os04G0493400	Similar to Chitinase.	0	0	0	5.3413	0	0	0.545822	0.10825	24.1619	0.258509	0.39182	6.06618	0.0507379	0.625216	8.27362
Os04G0497000	Similar to Allyl alcohol dehydrogenase.	0	3.7	-2.9906	0	0	0.903167	21.9701	2.50376	1.55433	1.17448	0.693566	1.68594	18.148	0.6714	1.81983
Os04G0498600	S-adenosylmethionine decarboxylase, Polyamine biosynthesis, Salt and drought stresses, Abiotic stress	0	-1.3474	0	0	0	4.00079	12.6918	17.1118	5.28131	5.95941	5.77595	32.2069	7.71418	2.6424	12.3339
Os04G0500700	Similar to Hydroxyanthranilate hydroxycinnamoyltransferase 3.	0	0	0	1.0427	0	21.5793	15.3778	109.234	107.94	109.838	16.4032	17.0094	67.1746	54.9656	173.639
Os04G0514600	Similar to NBS-LRR type disease resistance protein O2 (Fragment).	0	0	-1.4134	0	0	1.62402	3.92473	9.2454	13.4187	4.48776	1.87069	2.65261	22.4585	14.2087	7.98078
Os04G0517100	Similar to OSIGBa0145M07.4 protein.	0	3.5824	0	0	0	0.535256	49.2055	26.0413	49.0393	5.50512	0.723425	4.09656	43.3987	30.8526	9.34706
Os04G0518400	Similar to Phenylalanine ammonia-lyase (Fragment).	-2.1194	0	1.6968	0	0	4.03307	57.7505	50.0375	42.2478	94.1848	17.4937	99.3094	14.0762	67.3983	92.8789
Os04G0524600	Oligopeptide transporter OPT superfamily protein.	0	0	0	0	-2.4135	0.801162	5.28613	15.1564	4.90287	4.32763	2.30003	7.3626	8.18502	2.75936	25.3071
Os04G0531900	Short-chain dehydrogenase/reductase SDR domain containing protein	0	0	0	1.1806	0	9.59831	35.0172	28.4344	65.382	15.1313	10.9289	19.5588	29.3836	30.2594	18.8742
Os04G0538166	Similar to Elongation factor G, chloroplastic.	0	-2.0796	0	0	0	121.362	36.672	79.3126	10.4624	196.488	79.5977	154.594	25.8608	14.6587	266.12
Os04G0538400	Similar to Nodulin 21 (N-21)	0	2.9193	0	0	0	5.95775	16.5566	0.644987	4.07687	0.414692	13.6997	2.18269	0.465098	7.79436	3.50038
Os04G0546800	Pathogenesis-related transcriptional factor and ERF domain containing protein.	0	1.4198	0	0	0	22.3109	92.1421	51.3008	102.04	7.50344	19.7327	34.3474	59.0511	62.295	6.95858
Os04G0547900	Anti-sense to fibroblast growth factor protein GFG family protein	-1.0587	0	0	0	0	25.3916	58.4394	44.2181	5.37087	35.1723	24.0534	30.5053	83.9955	9.39188	16.8783
Os04G0549600	Chaperone DnaJ protein, Negative regulation of rice innate immunity, Basal resistance to Magnaporthe oryzae	0	-1.1615	0	0	0	233.109	60.2298	96.9106	42.1772	50.6887	149.298	134.365	54.7316	65.9312	72.757
Os04G0556400	Similar to UDP-glycosyltransferase UGT93B9.	0	0	0	2.0939	0	0.160097	0.283365	6.49087	15.423	5.56438	0.049177	0.448279	5.41606	3.79012	15.8282
Os04G0556500	cis-Zeatin-O-glucosyltransferase, Catalyze O-glucosylation of cZ and cZ-riboside	0	0	0	1.3523	0	3.00924	4.20083	26.8482	44.2764	6.2819	3.01877	6.04398	21.7318	18.1924	17.1618
Os04G0560500	Amine oxidase domain containing protein.	0	-1.4207	0	0	0	11.6032	9.65802	12.1276	3.2897	21.5211	14.9406	25.7867	8.06811	4.45448	23.1017
Os04G0560700	Conserved hypothetical protein.	0	0	0	1.0984	0	24.1103	66.0942	43.3871	164.259	22.926	25.7844	39.8323	48.9289	80.4796	31.6987
Os04G0561500	Similar to Prolyl endopeptidase (EC 3.4.21.26) (Post-proline cleaving enzyme) (PE)	0	-2.8317	-1.759	-1.4297	0	25.0625	2.47333	6.14512	11.6054	560.67	27.9669	17.5608	18.9678	32.7964	350.329
Os04G0565500	Similar to OSIGBa0158F05.8 protein	0	1.4233	0	0	0	23.1635	39.0227	29.876	42.7369	11.7952	22.7158	14.5112	37.869	25.5121	14.8554
Os04G0569300	Similar to Membrane protein.	0	0	-1.6311	0	0	1.95387	17.5983	20.178	28.2173	5.81013	6.60188	5.89176	56.9971	31.1981	11.1041
Os04G0578600	Similar to H0404F02.15 protein.	0	0	0	3.6351	0	2.17075	0.89787	0.293814	30.8171	0.730889	0.810276	0.230817	0.229524	2.60203	0.199318
Os04G0581100	2OG-Fe(II) oxygenase domain containing protein.	0	0	0	2.0416	-1.6757	0.909439	15.2104	97.2442	516.266	35.2925	0.132325	5.67372	77.6852	131.545	123.759
Os04G0581700	Similar to predicted protein.	0	0	0	2.8226	0	3.84016	2.1718	0.526435	53.3096	0	3.44801	2.94089	0.328995	7.90536	0.238082
Os04G0586100	Protein of unknown function DUF581 family protein.	0	0	0	1.6852	0	39.9903	29.578	17.2552	139.251	27.1198	42.4955	23.4542	16.6268	45.4266	23.7378
Os04G0586200	Similar to H0307D04.13 protein.	0	0	0	1.5806	0	40.6283	28.5564	9.73973	118.626	35.1084	36.6793	26.756	8.87187	41.6065	16.8714
Os04G0586500	Malectin-like carbohydrate-binding domain domain containing protein.	0	1.6031	-2.2567	0	0	20.2563	47.1854	17.6622	39.4159	15.6918	22.6735	15.4902	76.9732	28.869	20.2104
Os04G0592600	Similar to OSIGBa0142I02-OSIGBa0101B20.17 protein.	0	0	-1.6286	0	0	34.2393	59.6563	32.6473	62.9564	47.2255	27.5446	29.5313	92.0638	76.5047	37.7885
Os04G0598900	Similar to Wall-associated kinase-like protein.	0	0	-2.0258	0	0	0.76234	3.95897	6.30773	5.30964	15.0055	2.10752	1.296	23.4247	5.63287	17.6209
Os04G0605100	WRKY transcription factor 68.	0	0	-1.011	0	0	24.5046	132.765	105.136	123.149	83.7119	35.3791	80.6122	193.232	91.2623	83.1633
Os04G0607500	Ion transporter , Na+ transport	0	0	-1.7626	0	0	0.372813	7.00472	34.2167	0.882867	24.4849	0.31232	4.14395	105.881	0.488393	22.3174
Os04G0610400	APETALA-2-like transcription Factor, Control of the abscisic acid (ABA)/gibberellin (GA) balance	0	1.704	-1.418	0	0	5.55024	189.781	65.4117	70.5688	71.4258	8.21991	58.0935	159.395	49.7156	75.621
Os04G0612301	Hypothetical protein.	0	-1.8557	3.0445	0	-6.5442	0.66141	155.069	356.562	44.703	3.04945	5.28231	559.709	39.4102	4.76553	312.385
Os04G0613900	Similar to Potassium transporter 18.	0	-1.127	0	0	0	29.1547	18.0523	17.3924	12.5266	10.9185	21.4302	39.3213	11.0754	14.6824	15.7469
Os04G0614650	Similar to OSIGBa0126B18	0	0	0	0	-1.2509	5.75801	14.4588	7.86041	8.06774	6.59412	8.05059	21.7749	4.67939	5.03626	17.2259
Os04G0624600	Starch synthase, Starch biosynthesis	0	-1.6329	0	0	0	6.06652	6.26085	22.1036	2.9639	72.953	6.38616	19.3643	15.3104	2.77771	100.556
Os04G0628100	Similar to Polyubiquitin.	0	0	-1.0479	0	0	127.181	291.043	146.302	261.281	115.827	179.093	186.18	275.845	188.375	153.73
Os04G0631600	Basic helix-loop-helix dimerisation region bHLH domain containing protein.	0	0	0	2.0178	0	1.37887	18.1599	4.67491	17.6397	2.0396	0.867759	5.49316	8.00627	4.56937	3.82191
Os04G0635500	Similar to Wound induced protein (Fragment).	0	0	0	2.4722	0	28.2532	11.1934	18.1522	118.835	15.6109	14.7498	15.5052	17.1177	22.4661	5.08203
Os04G0635650	Non-protein coding transcript.	0	0	0	2.4567	0	27.5988	7.51521	36.6474	180.717	7.67695	21.277	20.3718	57.1063	34.5346	5.37926
Os04G0637000	Similar to BZIP transcription	0	0	0	1.3848	0	13.3436	13.0852	6.84806	32.3849	11.8909	13.2302	12.6119	5.40841	13.0102	13.2958
Os04G0650700	Similar to OSIGBa0113E10.3 protein.	0	0	-1.7985	0	-1.6428	294.58	69.3337	41.5519	465.89	43.3455	380.884	71.5683	131.817	455.601	148.575
Os04G0650800	Similar to Phosphoglycerate dehydrogenase	0	0	0	1.7961	0	65.8526	59.7537	47.6004	126.104	29.8956	57.2086	62.1984	22.259	38.0928	47.8315
Os04G0653700	Conserved hypothetical protein.	0	0	0	0	-2.5665	0.522166	0.170624	5.30423	55.7317	5.33346	0.192473	0	2.35531	30.8506	34.6783
Os04G0658400	Hypothetical conserved gene.	0	-7.0227	0	4.9129	0	3.49003	0.0543052	0.0888526	7.46492	0	6.37095	7.04222	0.0277642	0	0.107157
Os04G0667600	Heavy metal transport/detoxification protein domain containing protein.	0	1.0978	-1.2525	0	0	22.9136	118.268	74.0993	154.251	61.9071	28.0744	55.1079	161.004	131.087	51.4608
Os04G0669200	Similar to Ethylene response factor 2 (Ethylene response factor 3).	0	1.3396	-1.2869	0	0	29.9882	138.841	70.3569	78.3868	103.781	29.4719	54.7135	156.558	83.7348	75.2091
Os04G0674000	Similar to H0403D02.10 protein.	0	1.0794	0	0	0	20.5927	87.9443	35.6304	69.0766	20.135	28.4406	41.5059	65.2775	59.7784	16.051
Os04G0677500	Pyruvate kinase (EC 2.7.1.40).	0	0	0	1.0169	0	45.7383	96.5039	98.9342	94.6787	90.7059	52.4609	100.636	89.8288	49.0846	148.469
Os04G0683700	4-coumarate-Co-A ligase (4CL) like protein,	0	0	0	1.2499	0	3.61167	40.2433	1119.01	238.255	492.251	3.52789	29.6306	1079.88	105.094	582.999
Os04G0684900	Component of the CCR4-NOTcomplex, Deadenylase, Deadenylation (poly(A) tail shortening), Development and stress response	0	3.0584	-2.0324	1.8436	0	0.960443	65.6286	14.8509	107.235	3.60664	1.2495	7.85693	55.4034	31.344	4.87223
Os04G0685300	Harpin-induced 1 domain containing protein.	0	1.4469	-2.0788	0	0	23.8637	193.945	48.6999	61.5486	35.9798	28.1588	70.9481	187.618	66.5595	46.0198
Os04G0685700	Similar to H0723C07.4 protein.	0	0	-1.5668	0	0	13.927	34.3548	36.1716	44.139	46.1054	14.0121	19.6899	97.7196	37.7881	34.8889
Os04G0688100	Peroxidase	0	0	0	1.0031	0	8.41022	27.8589	386.891	334.054	53.3452	9.53861	25.7055	330.18	174.845	101.453
Os04G0688300	Haem peroxidase, plant/fungal/bacterial family protein.	0	0	0	1.305	0	3.37732	7.65916	9.97146	64.7671	2.14529	1.25418	7.43358	5.22113	27.4989	6.0941
Os04G0691600	Similar to 30S ribosomal protein S17.	0	0	0	0	1.2444	448.358	664.46	127.998	350.859	146.086	462.014	507.689	91.4286	493.147	67.6802
Os04G0691900	Chaperonin Cpn60/TCP-1 family protein.	0	0	0	-2.5514	0	0.424812	9.70489	14.5148	1.00038	18.0171	1.66037	10.1175	10.9636	6.15179	23.3768
Os05G0100500	Similar to Debaryomyces hansenii chromosome F of strain CBS767 of Debaryomyces hansenii.	0	-1.5007	0	0	-1.7851	18.6955	14.8276	20.6619	7.6993	7.77311	17.3536	41.8447	10.6131	5.13777	29.4048
Os05G0100600	Similar to aminophospholipid ATPase.	0	0	0	0	-1.3591	19.4322	11.6789	24.2415	36.4256	13.4389	15.5727	27.0436	20.9565	37.0744	37.8402
Os05G0101400	Similar to 50S ribosomal protein L28, chloroplast precursor.	0	0	0	0	1.2971	470.468	425.661	267.864	215.254	384.268	396.184	410.756	160.572	281.636	171.643
Os05G0101600	Cytochrome P450 family protein.	-1.8407	-2.2558	-2.9784	0	-3.6362	8.94975	8.34793	2.78393	30.6569	2.00833	31.9995	39.7614	20.0079	43.7486	27.4104
Os05G0102000	SAM dependent carboxyl methyltransferase family protein.	0	0	-2.2595	0	-2.195	0.0713285	0.0291343	3.71816	1.00436	12.2565	0.32865	0.0332872	16.2359	3.26713	61.5995
Os05G0103400	Protein of unknown function DUF3339 domain containing protein	0	1.6822	0	0	1.0973	235.089	522.058	191.893	258.362	155.195	193.24	162.239	134.979	345.773	79.6181
Os05G0105000	Similar to Methionine S-methyltransferase	1.3404	0	0	0	-1.1795	30.7421	29.6918	54.4897	45.3577	48.4923	12.1192	22.1672	34.8722	25.7789	120.562
Os05G0105050	Hypothetical conserved gene.	0	0	0	0	-3.851	12.3961	10.6981	19.6864	2.81527	3.51001	2.21094	11.0101	3.84121	1.95506	55.595
Os05G0110100	Heat shock protein DnaJ, cysteine-rich domain domain containing protein.	0	1.1291	0	0	2.2813	768.837	1158.96	480.753	465.135	222.155	605.099	528.439	272.233	545.592	50.1609
Os05G0111300	METALLOTHIONEIN2b, Metallothionein-like protein 2C,	0	4.22	0	0	0	30.8264	37.0787	13.1659	23.5738	18.435	6.36707	1.98426	4.70594	1.53178	1.19943
Os05G0113300	Cation/H+ exchanger domain containing protein.	0	0	0	1.1849	0	11.4583	12.032	12.4324	30.5456	13.0174	9.8435	7.13707	13.2071	14.0948	8.40075
Os05G0113500	Similar to BRI1-KD interacting protein 130.	-2.0256	-2.2051	-2.2195	0	-1.8465	77.1301	62.9364	44.4917	191.03	41.7544	313.487	289.429	188.965	212.654	164.82
Os05G0116100	Dehydroascorbate reductase.	0	1.9323	0	0	1.9047	58.7637	221.887	59.898	55.6877	109.762	47.2751	57.9812	38.3336	54.085	32.1762
Os05G0119300	Similar to ESTs AA754121.	0	0	-1.027	0	0	222.536	635.916	342.187	510.248	321.856	276.86	345.504	635.911	349.913	223.852
Os05G0124000	Ankyrin repeat domain containing protein.	-8.4651	-7.3727	0	0	-9.0621	0.152137	0.0745687	11.9296	51.177	0.0647475	53.6669	12.3253	17.3846	52.1146	37.9872
Os05G0126400	Conserved hypothetical protein.	0	-1.2178	0	0	0	56.9026	38.3337	39.903	17.7787	17.0635	53.1223	88.919	23.5213	14.8294	33.3932
Os05G0127500	Similar to Leucoanthocyanidin dioxygenase-like protein.	0	0	0	-1.2354	0	5.9565	65.2098	35.2097	29.8572	23.2525	5.64361	42.5967	29.9581	73.7452	29.2443
Os05G0128200	Hypothetical conserved gene. (Os05t0128200-01);Similar to Transposable element Mu1 sequence. (Os05t0128200-02)	0	1.0784	0	0	0	100.658	292.628	300.886	188.745	333.126	94.903	138.199	461.671	174.657	328.086
Os05G0130300	Conserved hypothetical protein.	0	2.2182	-2.4048	0	0	1.04172	85.2202	84.8677	23.4167	149.549	1.50851	18.2651	409.843	5.13146	184.472
Os05G0132100	AMP-dependent synthetase and ligase domain containing protein.	-1.1362	0	0	0	0	84.5971	164.734	83.2816	94.0856	24.6148	185.616	128.911	64.7243	168.686	49.9092
Os05G0136900	Transferase family protein	0	1.2465	0	1.5108	0	11.6711	69.2468	272.047	425.598	226.503	11.4884	29.1076	210.647	156.678	233.395
Os05G0138300	Similar to ICT protein (Fragment)	0	1.264	-1.1914	0	0	88.1213	201.073	105.305	361.024	196.918	88.9836	83.4997	219.309	362.57	154.701
Os05G0151400	AIG1 domain containing protein.	0	-1.1607	0	0	0	171.185	54.6722	26.5781	37.9258	26.0788	112.341	121.902	22.368	31.0032	31.3341
Os05G0160300	Bifunctional inhibitor/plant lipid transfer protein/seed storage domain containing protein.	0	1.9749	0	0	0	3.02514	247.364	91.2153	119.132	29.6947	12.9493	62.7548	159.359	82.3645	33.4268
Os05G0163250	Similar to predicted protein.	0	-2.2335	0	0	-2.6753	9.32384	7.73253	7.4868	1.62236	1.62195	9.96414	36.2655	1.65834	2.00699	11.3722
Os05G0177500	UDP-glucuronosyl/UDP-glucosyltransferase family protein.	0	0	0	0	1.5535	0.249514	0.727961	3.62085	0.577191	26.813	0.722637	0.964803	4.10886	0.440272	10.0264
Os05G0178300	Similar to Cadmium tolerant 1.	0	1.2987	0	0	0	51.4057	137.575	24.6565	80.3601	6.85262	70.0122	55.7719	31.8808	83.6033	9.80518
Os05G0178600	Similar to Auxin-responsive protein (Aux/IAA)	1.2171	0	0	0	0	92.0858	27.2129	26.1369	72.6238	42.6943	39.5402	33.8908	27.7804	67.1738	32.4735
Os05G0179300	Transferase family protein	0	1.8557	0	0	0	3.04074	19.1945	11.2382	16.9317	14.044	3.82102	5.28913	22.0514	15.9337	8.91186
Os05G0179950	Similar to cDNA, clone: J100088D24, full insert sequence.	1.0934	0	0	0	0	49.4992	34.4311	13.2428	34.146	4.5057	23.1568	26.139	14.383	37.3795	7.27708
Os05G0181700	Conserved hypothetical protein.	0	0	-1.4882	0	0	3.17138	20.3447	55.8531	235.885	52.6978	4.72751	3.22118	142.894	182.033	54.504
Os05G0186000	Similar to 30S ribosomal protein S31, chloroplast	0	0	0	0	1.2831	465.323	417.763	149.147	211.934	174.806	424.582	392.698	104.487	272.256	78.8416
Os05G0202800	Similar to Metallothionein-like protein 3B	0	-1.2721	0	0	-1.178	3633.68	1263.24	2115.26	2278.87	9544.24	3483.18	3042.75	2122.63	2245.06	5304.79
Os05G0208000	Similar to 2-oxoglutarate/malate translocator.					-1.178	8.91446	26.4048	33.8878	24.5174	22.04	12.1744	32.6826	24.4282	10.892	54.7391
Os05G0211100	Similar to Cytochrome P450-like protein.	0	0	0	-2.3619	0	1.05156	17.4117	12.4333	3.47387	10.93	3.9879	13.2498	8.04047	18.7333	5.11777
Os05G0217700	BURP domain containing protein.	0	0	0	-1.6256	2.1349	22.6892	107.817	756.091	38.3884	513.548	27.508	132.454	676.756	124.266	128.348
Os05G0217800	BURP domain containing protein.	0	0	1.037	0	2.2022	1.76691	2.88679	78.6289	1.09762	28.9732	2.01134	11.835	34.9443	8.50502	6.911
Os05G0223000	Similar to TCH2 (TOUCH 2); calcium ion binding.	0	0	-1.9206	0	0	9.59951	40.102	29.8339	26.2094	107.948	10.9317	17.191	103.002	30.4457	86.0502
Os05G0231700	Similar to Tonoplast intrinsic protein	0	1.0345	0	0	0	77.5182	152.519	27.844	89.4362	1.6707	109.008	74.2568	24.8338	106.296	1.34996
Os05G0243200	Similar to Ribosomal protein L13.	0	0	0	-1.3994	0	23.5317	31.0782	19.8647	15.2024	21.1125	25.5801	32.3167	12.4144	42.0685	22.5031
Os05G0267100	Similar to Transporter-like protein.	0	0	0	-1.0307	0	64.7994	77.0872	45.3357	58.6466	38.5491	81.1919	68.4373	45.1503	125.695	54.0176
Os05G0275000	Pentatricopeptide repeat domain containing protein.	0	-1.2793	0	0	0	27.4684	9.85305	10.1199	5.11361	12.3881	25.7587	23.8504	6.17737	6.23009	15.0076
Os05G0278500	Transferase family protein	0	0	0	1.7262	0	1.30875	0.0344878	10.0818	45.0894	28.2985	0.311233	0.275827	8.81617	14.2966	56.1095
Os05G0311500	Protein of unknown function DUF567 family protein.	0	0	0	0	1.1553	11.5741	35.0622	59.4924	24.4458	128.732	19.5538	20.8552	79.492	34.3058	63.4422
Os05G0320700	Similar to Cytochrome P450.	-1.9091	0	1.2893	0	-1.1035	5.73258	99.2732	125.545	48.8574	137.064	21.4915	112.161	46.8436	34.4871	323.279
Os05G0322900	WRKY transcription factor,	2.1743	0	-1.4018	-1.6061	0	56.8893	39.5486	180.717	233.824	111.372	12.5818	14.3894	435.473	746.768	91.1067
Os05G0337400	Similar to heavy-metal-associated domain-containing protein.	0	0	0	0	1.4434	220.13	172.366	69.3415	70.8295	76.0575	186.858	204.23	46.2438	97.0332	30.697
Os05G0337500	Hypothetical conserved gene.	2.5263	1.552	2.257	1.5629	2.3041	119.985	58.8896	39.2976	37.2534	17.7535	20.7901	20.0291	7.4972	13.2277	3.94579
Os05G0342000	Hypothetical conserved gene.	0	0	0	0	-2.5085	1.02179	6.60807	26.6315	12.1694	4.80159	1.96165	5.00685	14.4385	6.5733	29.9904
Os05G0343400	WRKY transcription factor, Disease resistance, Defense respons	0	1.1473	0	0	0	57.4658	197.405	155.492	251.775	57.5536	60.4325	88.8837	257.105	261.929	100.84
Os05G0344200	Conserved hypothetical protein.	0	0	-1.0701	0	0	503.947	507.156	223.562	892.735	27.6612	470.64	648.698	428.044	804.869	27.9785
Os05G0368000	Non-protein coding transcript.	0	0	-2.134	0	0	22.7821	9.98326	26.8878	470.029	8.18683	1.52936	3.23883	107.627	327.674	19.5778
Os05G0370700	Alpha/beta hydrolase family protein.	0	0	0	1.4705	0	1.33508	1.18978	5.67784	58.5756	7.16699	0.447379	1.75586	4.56218	22.1746	6.2606
Os05G0375400	Beta-glucanase precursor.	0	1.373	0	0	-1.125	8.8938	81.4856	1118.14	91.4244	53.6077	18.4968	31.3763	1044.22	156.591	128.337
Os05G0382600	Similar to Annexin-like protein RJ4	0	1.5261	0	0	0	22.1003	110.885	84.16	43.9448	22.958	18.4392	38.3974	98.0403	76.7741	28.5237
Os05G0382900	Annexin family protein	0	0	0	-1.2137	0	15.2501	40.0871	32.3798	19.5243	15.3688	15.3517	19.7298	29.3027	47.5052	13.7515
Os05G0391600	Glycosyltransferase AER61, uncharacterized domain containing protein.	0	0	-1.2006	0	0	10.5442	24.1345	18.3426	15.1127	6.5063	13.1255	14.1162	38.4466	22.1725	10.7091
Os05G0393400	Similar to PAC (Fragment).	0	-1.0469	0	0	0	66.3795	31.8913	10.5772	18.8865	16.5052	54.1009	65.7149	9.09205	20.9517	17.0275
Os05G0402700	Similar to Fructose-bisphosphate aldolase, cytoplasmic isozyme	0	0	0	1.3119	0	81.2174	307.834	231.869	428.85	153.775	101.566	283.182	228.006	181.216	311.992
Os05G0409500	Similar to MtN21 protein.	0	0	-1.0392	0	0	52.3447	46.9953	44.8018	45.3865	59.5913	49.3497	43.581	83.9641	41.5623	74.8273
Os05G0412800	Similar to Glutathione S-transferase GST 41	0	0	0	0	-2.7669	0.109865	2.01936	3.67113	1.23758	2.98077	0.253105	9.33136	3.76261	4.2972	22.27
Os05G0418600	Hypothetical conserved gene.	5.2369	7.8262	0	6.0226	7.0148	57.4364	65.705	2.02145	65.7741	39.1678	1.52038	0.288734	0.947481	1.06139	0.332441
Os05G0427100	Octicosapeptide/Phox/Bem1p domain containing protein.	0	0	-1.2396	0	0	50.4929	39.0329	21.6473	39.3668	15.3216	42.0389	41.4161	46.6151	50.1998	17.3652
Os05G0427400	Similar to Phenylalanine ammonia-lyase	0	0	0	1.1426	0	0.395739	11.4889	74.3504	41.2135	34.9799	1.79534	13.6664	36.2602	19.5834	57.044
Os05G0429500	Similar to dienelactone hydrolase family protein.	0	0	0	0	1.12	510.939	259.294	193.84	163.818	108.936	437.802	256.746	243.644	196.34	55.0139
Os05G0444200	Similar to T6J4.5 protein (WIP6 protein)	0	0	0	1.3903	0	1.41779	75.4964	31.6501	61.992	24.6519	1.68471	38.5497	40.9515	24.8087	39.3933
Os05G0447700	Tetratricopeptide-like helical domain containing protein.	0	0	-2.2732	0	0	119.006	162.562	10.3733	128.456	16.5371	158.012	135.048	45.7273	105.98	8.20049
Os05G0452500	Conserved hypothetical protein.	0	-1.0641	0	0	0	28.4755	14.066	10.8769	7.72601	13.6756	24.1175	29.3316	5.43579	7.75912	16.2397
Os05G0454500	Conserved hypothetical protein.	0	0	0	1.282	0	23.269	89.5373	94.5049	198.884	13.209	17.651	62.0423	125.094	85.7995	13.2652
Os05G0462000	Similar to plant-specific domain TIGR01589 family protein.	0	0	0	1.5369	1.3127	154.226	64.2158	268.483	129.174	229.163	76.4207	69.9569	268.619	46.6998	101.264
Os05G0462400	Lipin, N-terminal conserved region domain containing protein.	0	0	0	0	-1.2567	5.49926	5.88536	11.0539	3.60156	7.84675	5.02835	10.3251	7.53131	4.03688	20.5809
Os05G0473500	Exo70 exocyst complex subunit family protein.	0	0	-1.1965	0	0	25.2207	51.4777	37.9721	48.5746	17.5809	22.1726	34.8699	79.3645	46.0263	26.3437
Os05G0476700	U-box E3ubiquitin ligase, Positive regulation of cold stress response	0	2.7244	-2.2392	0	0	3.12194	28.0867	7.18945	6.45114	6.90212	3.36261	4.23834	30.9546	8.34653	6.17614
Os05G0481100	Similar to cDNA clone:J013034D11, full insert sequence.	0	0	0	0	-1.3692	88.6615	159.803	132.691	160.012	28.0078	108.004	174.351	107.913	158.413	79.4178
Os05G0494200	Similar to Cysteine proteinase inhibitor-II (Oryzacystatin-II).	0	0	0	1.0357	0	83.8693	197.808	114.705	381.368	172.902	92.8147	137.456	133.686	195.146	209.984
Os05G0495250	Non-protein coding transcript.	0	0	-3.0617	0	0	3.63776	26.6161	25.2271	34.742	28.776	2.33199	5.60962	192.095	28.164	23.9654
Os05G0497300	Similar to Ethylene response factor 2.	0	1.1473	-1.2249	0	0	40.438	238.187	139.968	191.528	110.845	45.2138	107.245	298.348	154.221	112.986
Os05G0502000	Similar to Cyclic nucleotide-gated ion channel 4 (AtCNGC4) (Cyclic nucleotide-and calmodulin-regulated ion channel 4) (AtHLM1).	0	-2.0286	0	0	0	9.58371	7.40639	7.27815	3.31613	6.25711	11.8422	30.1384	6.4361	6.16533	11.1475
Os05G0506200	KOW domain containing protein.	0	-1.1166	0	0	0	46.6328	26.3802	35.6451	16.3894	17.9917	47.0915	57.0479	22.9298	17.8272	34.703
Os05G0516700	Conserved hypothetical protein.	0	4.3654	0	0	0	0.543721	46.4473	0.968981	2.18742	0.74379	0.71578	2.24742	14.2092	1.59901	0.563434
Os05G0520600	Conserved hypothetical protein.	0	1.2471	0	0	0	29.2935	102.076	63.0924	74.9952	51.1123	46.0491	42.8879	73.538	91.5842	65.9056
Os05G0522600	Leucine-rich repeat, plant specific containing protein.	0	0	0	0	-1.0763	15.4697	17.5124	40.2246	33.1432	26.9237	17.3586	20.88	41.5786	29.6841	62.3142
Os05G0525900	Similar to Zing finger transcription factor PEI1.	0	0	0	2.7279	0	5.19846	7.84986	4.95969	114.344	0.44695	7.64535	7.05742	5.13181	18.1062	0.126965
Os05G0526200	Similar to Calcium homeostasis regulator CHoR1.	0	-1.1658	0	0	0	136.51	39.1824	38.2254	32.7063	41.3996	99.0772	87.6741	31.2867	39.7178	43.6533
Os05G0531000	Protein of unknown function DUF584 family protein.	0	0	-1.1346	0	0	26.5561	49.5747	90.467	8.43704	112.204	54.3327	17.7172	181.144	14.9006	91.6414
Os05G0537100	WRKY transcription factor 10	0	2.0245	0	0	0	11.6623	26.2108	23.4704	215.641	16.6453	6.18605	6.42481	30.3653	137.022	23.2008
Os05G0541900	Similar to 60S ribosomal protein l28.	0	-4.989	0	0	0	1.58176	1.67088	1.19075	2.88005	1.47983	1.63353	52.9191	1.02511	2.35796	1.51665
Os05G0548900	Similar to Phosphoethanolamine methyltransferase	-1.8672	0	0	0	-1.3654	5.99642	67.4264	84.4053	4.94412	19.5835	21.8371	55.8478	64.74	5.64403	55.3853
Os05G0550300	Similar to Lipid transfer protein (Fragment)	0	0	-1.2708	0	0	15.7151	205.404	130.883	263.471	47.263	28.8668	126.044	288.005	256.545	76.5026
Os05G0552800	Conserved hypothetical protein.	0	0	-3.4268	0	0	0	16.4231	2.80581	2.67164	4.72473	0.0744022	1.88395	27.5164	1.579	3.2537
Os05G0557700	Ubiquitin-conjugating E2 enzyme, Phosphate homeostasis	0	0	0	1.0224	-1.0674	28.8632	21.4847	30.2868	57.7791	15.7529	26.1724	31.0406	36.6764	29.8401	36.2355
Os05G0560000	Photosystem I reaction center subunit VI, chloroplast precursor (PSI- H) (Light-harvesting complex I 11	0	0	0	0	1.0651	2519.41	2806.67	5250.24	2018.92	3242.46	3186.43	2123.94	6437.97	2519.96	1701.06
Os05G0563400	Similar to Auxin response factor 5	0	0	0	1.5113	0	17.4612	26.5272	20.0925	35.5755	15.4373	18.1165	27.8463	25.2622	13.0917	19.1357
Os05G0566400	Similar to Blast and wounding induced mitogen-activated	0	1.7529	-1.4387	0	0	13.1624	38.3692	23.6794	9.46191	39.2713	14.07	11.354	58.5378	19.2241	35.7342
Os05G0568800	Protein of unknown function DUF1645 family protein.	0	0	0	-2.9066	0	63.9221	61.3366	115.074	18.7324	44.9495	104.115	42.5203	151.619	147.354	55.5994
Os05G0574800	Hypothetical conserved gene.	0	-1.5562	0	0	0	39.1685	7.91229	0.701827	5.23046	2.60463	30.739	23.2063	0.604567	6.13508	1.7157
Os05G0576600	Conserved hypothetical protein.	0	0	0	0	-1.1065	7.38598	19.3193	96.316	103.8	49.7199	8.18062	17.6982	56.8904	101.755	117.513
Os05G0582300	Similar to prenyl transferase.	0	0	1.6218	0	0	4.34331	4.49123	94.6967	1.85793	135.3	4.76237	9.59577	28.0596	0.962024	201.75
Os05G0592400	UV-damaged DNA binding protein.	0	0	0	0	-1.7547	12.309	9.27344	8.43336	4.6231	3.59232	10.4364	19.7018	3.5753	4.92557	13.3062
Os05G0594500	Invasin/intimin cell-adhesion domain containing protein.	0	-1.0548	0	0	0	101.649	40.4879	13.0327	32.8995	9.20573	94.1151	83.8852	11.4767	44.4694	11.8348
Os06G0102100	Cytochrome P450 93G2 protein (CYP93G2),	-3.1751	0	1.5817	-3.6601	0	3.93149	243.172	56.8667	5.39265	95.9562	35.4483	189.135	17.3259	71.5147	120.355
Os06G0106800	Similar to glycoside hydrolase, family 28.	0	1.6999	0	1.9327	0	1.09315	247.509	119.518	111.107	27.1772	0.973771	75.9775	103.243	30.5299	50.8954
Os06G0113900	Major facilitator superfamily, general substrate transporter domain containing protein.	0	0	0	0	-1.3136	39.6901	61.6017	28.4282	33.3701	17.0974	39.2717	60.7007	19.3595	33.2688	46.6466
Os06G0127100	Dehydration-responsive element-binding protein 1C.	0	5.1764	-7.0547	0	0	0	20.304	0.458219	0.120681	0	0.0789793	0.559957	55.5546	0.176435	0.0690772
Os06G0129900	Similar to Cytochrome P450 CYPD.	0	0	0	0	-1.2992	130.923	95.302	47.8365	123.604	27.951	76.5781	71.0565	37.6181	98.9268	75.5039
Os06G0131400		0	0	1.2559	0	0	13.6703	29.6544	172.378	7.84508	36.0564	21.0661	64.4391	65.8265	3.902	84.5325
Os06G0133500	Conserved hypothetical protein.	0	2.9464	-3.242	0	0	1.31712	80.0822	9.05377	21.7253	8.00785	0.866957	10.3615	78.114	26.9206	10.7673
Os06G0142500	Similar to Wall-associated kinase 3.	0	-1.4041	0	-1.3949	0	138.083	11.3359	23.3589	17.0317	78.9453	236.792	29.9194	29.4423	46.9852	59.3201
Os06G0149900	Similar to Cysteine synthase	0	0	0	0	-1.0681	44.7711	47.1765	68.3092	57.0517	58.4965	42.6906	58.4838	43.8538	38.3274	134.621
Os06G0196900	Similar to Chaperonin.	0	-1.0044	0	0	0	450.699	223.722	115.601	159.651	169.404	420.617	447.607	87.3209	116.193	215.359
Os06G0199300	Non-protein coding transcript.	0	0	0	-1.4789	0	43.9848	98.6893	85.303	67.3984	73.9035	70.7943	48.112	195.009	197.073	54.6999
Os06G0199400	Conserved hypothetical protein	0	0	0	-1.6173	0	50.854	113.174	109.519	47.8476	68.1693	75.3635	97.1207	169.522	153.994	89.5984
Os06G0202900	Serine/threonine protein kinase domain containing protein.	0	1.9965	0	0	0	4.96798	26.6122	3.73737	6.50789	2.03632	5.96648	6.65123	8.63971	4.06569	2.36306
Os06G0203600	Chalcone isomerase domain containing protein	0	2.7034	-3.0948	0	0	1.84769	26.0833	2.5996	6.93782	4.31116	1.76241	3.99367	20.2536	7.97435	3.03064
Os06G0210000	Protein of unknown function DUF6 domain containing protein.	0	0	0	3.3123	0	4.20273	4.83195	2.58907	16.1825	1.65614	2.62972	0.920119	1.43023	1.70899	5.39459
Os06G0228200	Aquaporin NIP III subfamily protein, Aquaporin, Silicon influx transporter, Water transport	0	1.3601	0	1.9188	0	48.2925	84.9297	85.7631	361.445	71.5328	36.9246	32.9953	131.292	100.282	117.528
Os06G0229000	Similar to FtsH protease (VAR2) (Zinc dependent protease).	0	0	0	0	2.5232	1.98137	0.693682	7.90284	0.265706	109.522	1.65197	0.616437	11.8218	0.388463	20.9123
Os06G0247800	Similar to Dynamin-like protein	0	0	0	0	-1.1634	53.6548	41.8386	47.1184	38.5034	24.6513	52.2699	68.4616	34.8174	29.5533	60.6078
Os06G0251100	Membrane attack complex component/perforin (MACPF) domain domain containing protein.	0	0	-1.2902	0	0	27.4032	31.1048	21.2381	35.7736	40.1986	49.479	26.2185	47.3663	66.1514	50.3473
Os06G0254300	Similar to EF-hand calcium bining protein.	0	0	0	-1.5089	0	22.6176	72.9165	259.884	19.4356	398.789	44.4072	62.3358	306.974	58.0263	312.824
Os06G0254700	Caleosin related family protein.	0	2.3342	0	0	0	2.64875	58.7239	5.37908	13.0103	4.12898	7.83344	11.6136	10.2393	11.9199	6.30519
Os06G0255200	Conserved hypothetical protein.	0	-2.2074	0	0	0	4.77369	3.60661	5.95021	0.990771	1.90832	7.3995	16.6116	1.3599	1.53372	9.94117
Os06G0255400	Similar to Nudix hydrolase 18, mitochondrial precursor	0	1.5685	0	0	0	26.8634	185.023	126.492	70.5093	105.038	39.5306	62.2122	218.782	88.8275	97.566
Os06G0260000	Conserved hypothetical protein.	0	0	1.0082	0	-1.1639	11.9104	47.9501	48.8145	28.5529	24.8459	18.064	41.1981	22.1315	35.5011	61.1078
Os06G0264300	Similar to RAD23, isoform I.	0	0	0	0	-1.5374	53.7153	66.3725	49.7819	49.4835	13.955	54.5738	83.3093	31.1112	29.8346	44.4633
Os06G0270200	Similar to Potassium transporter 24	0	0	0	0	-1.8194	1.84865	9.21421	11.1966	3.69705	5.24508	2.46891	9.82746	6.89289	4.88113	20.3196
Os06G0270900	Similar to RF2 (EC 1.2.1.3) (T cytoplasm male sterility restorer factor 2).	0	0	0	0	-1.7447	170.779	135.532	106.337	78.4564	25.3854	182.152	202.903	58.7635	50.2117	93.3787
Os06G0281400	Similar to DNA topoisomerase.	0	-1.2368	0	0	0	19.5327	7.49868	3.69465	4.68649	6.29845	16.7337	17.6247	2.26377	4.4478	6.35151
Os06G0288100	protein kinase	-1.1851	0	0	0	0	21.6253	29.8781	62.365	62.65	34.9475	49.0837	19.952	86.2552	83.4072	55.3793
Os06G0288300	C-glucosyltransferase, Flavone-C-glycoside synthesis	0	0	0	-2.2007	0	8.03481	26.7622	15.5369	6.44408	40.761	18.7776	43.1789	13.596	31.0774	31.8452
Os06G0289900	UDP-glucuronosyl/UDP-glucosyltransferase family protein.	-2.5595	1.3163	0	-2.8407	0	20.9918	873.509	26.0886	24.4242	50.9778	123.531	349.815	9.72091	183.545	34.6391
Os06G0301300	Similar to predicted protein.	0	-1.4514	0	0	-2.5847	14.0399	12.5008	16.127	4.93172	4.57418	12.8271	34.0932	5.37412	4.20852	30.119
Os06G0318800	Non-protein coding transcript	0	1.454	-1.8574	0	0	21.175	419.852	247.997	376.063	273.821	24.6164	152.839	819.525	314.637	337.042
Os06G0340200	Zinc finger, RING-CH-type domain containing protein	0	0	0	-1.0097	0	29.8737	54.0612	20.0103	18.3416	28.3963	46.4811	44.5852	15.9092	38.7429	34.9404
Os06G0348800	Transfactor-like protein.	0	-1.2462	0	0	0	31.1265	25.9235	195.638	8.47171	103.917	21.4426	61.3279	151.816	7.26729	82.4207
Os06G0351500	Lipase, GDSL domain containing protein.	0	0	0	-2.5347	0	0.651538	68.6152	3.19309	3.63142	3.75492	5.60374	39.5273	3.90034	22.0749	5.64508
Os06G0356800	Similar to Xylanase inhibitor protein I precursor.	0	0	0	1.9391	0	37.1625	35.8382	21.265	89.5669	5.49514	16.8493	39.8385	46.8606	24.5029	7.65548
Os06G0474800	Similar to 3Fe-4S ferredoxin.	0	-1.0388	0	0	0	196.28	61.7724	0.460537	38.1787	0.338401	157.463	126.572	0.232464	31.7553	0.320431
Os06G0476200	Similar to Phosphoglucomutase precursor (EC 5.4.2.2)	0	-1.0794	0	0	0	312.279	134.568	52.6102	50.5546	23.1706	314.786	283.602	31.1887	42.105	17.7004
Os06G0493100	Conserved hypothetical protein.	0	0	0	0	-1.5683	7.55058	0.202233	6.28686	41.0455	35.0317	4.10633	0.11553	23.9874	27.3925	114.03
Os06G0493600	Phosphate (Pi) transporter, Pi homeostasis	0	0	0	0	-1.2637	4.06974	14.6728	41.3896	19.9927	18.0702	5.44738	14.8756	29.1329	13.5499	47.6257
Os06G0501900	Cytochrome P450 family protein.	0	0	0	1.9659	0	0.97556	11.1253	4.3812	28.2699	2.07593	1.22263	8.70474	3.7485	7.59134	3.39672
Os06G0538400	Conserved hypothetical protein.	0	1.5792	0	2.6725	0	4.05689	47.9671	42.1744	38.734	6.66392	8.91986	16.0096	37.3951	6.37353	7.91624
Os06G0547400	Similar to Peroxidase P7 (EC 1.11.1.7) (TP7).	0	-2.8433	1.4556	1.6079	0	0.438479	14.4472	65.7267	35.261	0.466529	0.808128	103.405	21.8538	12.1357	1.64922
Os06G0552900	Similar to SP3D	0	0	0	1.8431	0	36.5762	31.5832	29.1401	58.4772	6.65772	9.95373	11.9589	20.5964	17.0988	10.2668
Os06G0568200	Vacuolar ATPase B subunit.	0	0	0	0	-2.0085	17.2603	37.4722	35.9565	16.974	11.0353	22.2534	54.759	19.6812	11.28	48.7372
Os06G0568600	Similar to Ent-kaurene oxidase 1 (Fragment)	0	0	0	0	-1.7842	1.2711	0.385678	7.28118	19.5088	8.38493	0.468532	0.169482	4.61105	12.747	31.7001
Os06G0573600	Similar to Beta-galactosidase precursor	0	1.5442	-1.2808	0	0	2.44618	33.4787	24.9244	2.32122	0.867553	3.78964	11.4488	55.2285	5.76553	2.40016
Os06G0591400	Conserved hypothetical protein.	0	0	0	0	-1.2811	13.0282	11.8868	109.079	446.824	90.4608	13.5649	6.31683	158.292	255.574	241.306
Os06G0605900	Leucine-rich repeat, cysteine-containing subtype containing protein.	0	0	0	1.9278	-1.12	28.7302	28.4778	43.0808	63.8307	13.2215	27.5745	34.5475	25.6316	17.6	31.5421
Os06G0606700	Tetratricopeptide-like helical domain containing protein.	0	0	0	0	1.1386	215.094	83.5151	115.494	206.127	429.366	139.24	88.013	115.632	120.801	214.055
Os06G0640599	Hypothetical protein.	0	1.3367	0	-1.0035	0	100.765	182.397	78.139	221.378	54.5284	168.334	72.021	96.5385	465.596	102.193
Os06G0641066	Hypothetical protein.	0	0	0	0	-2.5476	2.98994	3.17524	4.0344	6.88643	2.40862	2.95207	4.50491	2.78294	5.05597	15.4572
Os06G0646100	Conserved hypothetical protein.	0	0	-1.7535	0	0	46.8696	169.159	83.0012	122.286	23.2577	63.3345	107.526	255.218	108.141	20.4751
Os06G0647100	Similar to 50S ribosomal protein L35, chloroplast precursor (CL35).	0	0	0	0	1.0247	244.849	255.279	128.443	208.372	156.922	250.932	192.113	110.674	246.445	84.6583
Os06G0647400	Similar to Lysosomal Pro-X carboxypeptidase.	0	0	0	0	-1.23	58.5117	22.1448	22.0288	41.1047	11.0359	38.3797	33.8837	14.2453	47.1591	28.4133
Os06G0649000	PAMP (pathogen-associated molecular pattern)-responsive transrepressor, Defense response	0	3.7187	0	0	0	1.76328	21.1393	6.11492	31.2366	1.16621	0.526989	1.60127	8.43919	16.6779	2.88073
Os06G0650900	Conserved hypothetical protein.	0	0	0	1.2326	0	9.28532	46.0531	69.2529	76.8757	45.0984	10.1123	19.5839	85.2666	34.3197	34.9403
Os06G0661800	Similar to Cryptochrome DASH, chloroplastic/mitochondrial.	0	-1.0344	1.0011	-1.8069	0	13.8451	24.9003	60.9971	9.66988	62.8304	28.5288	50.8666	27.7926	35.4947	69.9423
Os06G0663200	Similar to Protein kinase APK1B, chloroplast precursor (EC 2.7.1.-)	0	0	-1.1911	0	0	11.5501	22.7016	18.4171	15.0202	13.213	10.03	15.5625	38.3497	12.7228	17.405
Os06G0666400	VQ domain containing protein.	0	1.0573	0	0	0	59.2867	109.679	144.064	264.101	55.6116	46.0351	52.5607	132.221	171.428	82.5898
Os06G0671900	Similar to Tubulin beta-3 chain.	0	0	0	0	-1.3217	61.1094	72.0249	39.1356	50.8433	19.3738	77.4221	79.5723	26.7089	38.3848	53.1565
Os06G0683400	Small calcium-binding protein with one EF-hand motif	0	3.2676	-2.3936	0	0	2.80489	157.785	23.8729	37.9967	12.6576	5.08034	16.3395	114.4	30.2645	15.2011
Os06G0697000	Similar to Xyloglucan endo-transglucosylase/hydrolase 1	0	3.4536	-5.8211	0	0	0.792382	50.9602	1.09119	0.30429	1.30293	2.32333	4.63912	56.2599	1.92778	0.290291
Os06G0716700	Similar to Heat shock protein 90.	0	0	0	0	-1.2014	131.708	58.6868	75.3226	60.6983	68.7062	166.941	93.1863	54.2267	73.3678	173.429
Os06G0717100	Senescence-associated family protein.	0	0	-2.2467	0	0	21.2958	34.8908	26.3889	20.8501	27.0626	18.3038	19.3563	114.212	19.5844	26.2752
Os06G0720700	Domain of unknown function DUF1618 domain containing protein.	0	1.8727	0	0	0	16.77	20.7482	14.0441	34.8567	19.3975	15.2293	5.65041	17.7862	37.7459	11.357
Os06G0726300	NAC transcription factor, Drought and cold stress tolerance	-1.7814	0	0	0	0	14.2209	21.9771	54.0438	68.5149	33.2533	48.8003	11.8863	87.6724	68.6545	49.7385
Os06G0727200	Catalase isozyme B	0	0	0	0	-1.1744	80.3045	187.983	61.533	141.771	28.4066	124.744	135.646	50.8094	83.4438	70.3759
Os06G0731600	ARID/BRIGHT DNA-binding domain domain containing protein.	0	-1.5068	0	0	0	16.8681	9.92133	13.0311	4.62878	8.79827	16.2093	28.1192	6.76321	4.78071	14.7461
Os06G0731800	Clathrin light chain family protein.	0	0	0	0	-1.1346	80.478	79.9686	63.4591	73.278	28.6491	89.4204	103.91	36.4497	43.9306	69.0415
Os07G0102100	Similar to Potassium transporter 22.	0	0	0	0	-1.473	14.6326	49.2769	40.2118	15.1793	8.17466	24.3031	44.1948	27.492	30.5669	24.9089
Os07G0111900	Flavin-containing monooxygenase FMO family protein.	0	0	0	-8.1424	0	45.7122	66.1997	57.8572	0.257722	34.1282	64.8099	61.6705	61.5754	76.3941	28.4712
Os07G0112800	Similar to Eukaryotic translation initiation factor 5A-4 (eIF-5A-4).	0	0	0	-2.3312	0	114.494	104.316	43.3373	14.69	43.1895	109.004	102.685	33.5271	77.551	43.1739
Os07G0119800	Protein of unknown function DUF538 domain containing protein.	0	1.6799	0	0	0	2.2736	267.701	18.0982	12.0586	59.1858	1.95547	83.3262	21.1439	11.7011	51.9198
Os07G0124100	Similar to Phytosulfokines 4 precursor.	0	0	0	0	-1.2177	75.1679	45.6671	128.6	233.871	220.616	99.7461	45.005	100.74	306.272	563.202
Os07G0129200	Pathogenesis-related 1a protein, Regulation of abiotic stress responses	0	0	0	2.0966	-2.2761	1.53949	0	27.71	643.449	35.8169	1.98612	0.47896	8.05858	157.826	190.42
Os07G0129300	Similar to PR1a protein.	0	0	0	0	-3.9353	7.77137	0	217.137	639.441	138.845	1.27629	0	195.516	674.062	2331.59
Os07G0134800	Similar to Succinate dehydrogenase [ubiquinone] flavoprotein subunit, mitochondrial	0	0	1.0828	0	-1.7189	15.9724	43.9645	63.0067	24.0824	36.432	24.846	60.8185	27.1264	8.83852	131.638
Os07G0142100	Conserved hypothetical protein	0	5.8526	0	2.6275	0	6.70948	33.5965	0	50.4738	15.0706	12.7092	0.579842	0.934079	8.56866	9.91408
Os07G0142900	Aldo/keto reductase family protein.	0	0	0	0	1.2423	197.023	208.514	357.497	121.916	558.331	136.741	150.13	337.241	91.4512	259.048
Os07G0147500	Similar to Photosystem II 10 kDa polypeptide, chloroplast precursor.	1.6019	-3.6159	0	0	0	2117.1	14.753	1101.34	233.771	934.904	696.248	180.389	745.976	215.892	570.055
Os07G0147800	Hypothetical conserved gene.	0	-1.4147	0	0	0	34.6876	10.0149	11.9705	7.96566	13.4095	26.3428	26.6277	8.58954	9.11026	18.6998
Os07G0147900	Similar to Ferredoxin-NADP reductase precursor	0	0	0	0	-1.3105	22.3226	35.533	36.7507	56.8467	27.9578	26.0952	32.5022	24.4354	48.3604	76.1124
Os07G0150700	Serine/threonine protein kinase, Pollination and drought stress responses,	0	0	0	0	-1.1306	33.1726	44.3822	68.7137	132.644	37.1368	23.5171	46.0869	56.3152	84.1855	89.2513
Os07G0155600	Nramp ion-transporter family protein, Ethylene signaling pathway	0	-1.1002	0	0	0	12.5035	8.05034	8.04517	3.93023	3.15159	9.25182	17.2128	4.12774	4.26553	8.57392
Os07G0162400	Alpha/beta hydrolase fold-3 domain containing protein.	0	0	0	0	-1.3103	45.8567	76.0783	88.8288	137.45	58.5035	50.5253	50.3418	66.0027	103.528	159.255
Os07G0162700	Alpha/beta hydrolase fold-3 domain containing protein.	0	1.4215	0	0	0	3.30996	43.7721	11.6693	5.40366	0.51039	16.6212	16.2974	12.1813	13.2328	0.773259
Os07G0164000	Small RNA methyltransferase, Small RNA stabilization, Regulation of shoot development	0	-1.3217	1.0454	0	-2.5382	9.1415	7.80564	27.3303	13.6145	8.56	8.80517	19.4581	12.0759	9.81383	54.5752
Os07G0164800	Conserved hypothetical protein	0	1.3831	-2.2036	0	0	16.7117	83.0697	27.5713	72.4836	45.799	14.3734	31.7629	115.821	61.6645	37.3874
Os07G0173700	40S ribosomal protein S18.	0	-5.5658	0	0	0	32.989	0	25.9318	51.5029	26.0858	32.3284	35.9994	28.6381	40.0081	24.7408
Os07G0178700	Similar to Low molecular mass early light-inducible protein HV90, chloroplast precursor (ELIP).	0	-5.6424	0	0	1.6224	4.08382	0.28272	21.3403	2.09545	1483.29	16.0737	14.0837	5.43486	0.142491	528.809
Os07G0178800	Similar to Low molecular mass early light-inducible protein HV90, chloroplast precursor (ELIP).	-1.6466	-5.1938	3.5807	0	1.9277	60.9958	2.46297	178.759	42.3445	3342.76	190.638	89.9052	13.6254	22.5191	964.404
Os07G0179300	Methyltransferase type 11 domain containing protein.	0	0	2.9602	0	1.8517	2.96735	2.04697	23.5031	1.99627	86.1558	4.67895	4.92369	2.75405	4.41177	26.2015
Os07G0185900	Conserved hypothetical protein.	0	1.1048	0	0	0	16.2643	149.86	670.326	72.719	1244.03	31.046	69.494	609.59	41.0912	825.502
Os07G0190000	Similar to 1-deoxy-D-xylulose 5-phosphate synthase 2 precursor.	0	1.1959	0	0	-1.0036	28.8713	41.8379	44.3141	83.2981	21.782	47.4267	18.2132	43.581	140.317	47.9371
Os07G0198300	Bifunctional inhibitor/plant lipid transfer protein/seed storage domain containing protein.	0	0	0	1.2198	0	121.213	53.5528	49.8659	277.189	126.861	116.471	76.6073	47.6996	124.844	128.501
Os07G0227800	Similar to ubiquinone biosynthesis protein ubiB.	0	-1.4983	0	0	0	22.4823	12.6265	30.9262	6.97435	25.3033	18.5488	35.5741	18.6622	5.60447	43.8847
Os07G0283050	Concanavalin A-like lectin/glucanase, subgroup domain containing protein.	-1.4464	0	0	-1.3465	0	23.8972	31.7163	26.2079	22.4029	18.2095	65.0132	41.6211	16.7316	59.7646	39.3641
Os07G0413800	Conserved hypothetical protein.	0	0	0	-3.2906	1.4227	3.28364	66.9553	13.2527	2.13048	69.3258	3.14457	35.3952	17.3713	21.8696	28.3853
Os07G0421866	Similar to tetratricopeptide repeat (TPR)-containing protein.	0	-2.5227	0	0	0	25.7794	6.58103	14.3569	2.13258	6.10283	19.3017	37.7158	5.16808	2.91882	13.9729
Os07G0421932	Hypothetical gene.	0	-2.2673	0	0	0	32.877	7.53262	17.1665	2.9368	8.70124	28.678	36.1671	8.11492	2.2033	14.8637
Os07G0424400	Similar to Cellulose synthase-7	0	0	0	0	-1.1089	12.0194	122.204	15.9495	23.8186	9.17717	19.4228	97.2518	10.2204	35.5348	21.7268
Os07G0438500	Octicosapeptide/Phox/Bem1p domain containing protein.	0	0	0	0	-1.3926	25.5256	23.1746	28.2279	9.78467	11.1975	24.4802	44.0046	14.0018	7.84056	32.2704
Os07G0477500	Histone deacetylation protein Rxt3 domain containing protein.	0	0	0	0	-1.1365	18.4316	13.5969	13.1428	9.62627	8.27039	18.7906	26.1061	9.42468	8.64364	19.9576
Os07G0516300	Protein of unknown function DUF584 family protein.	0	0	0	1.5838	0	10.2947	35.5841	24.3995	81.1557	43.1422	8.45408	19.0209	34.5722	28.401	32.0601
Os07G0524900	Protein of unknown function DUF6, transmembrane domain containing protein.	0	0	0	1.7915	0	3.8466	1.7854	2.41488	47.3617	2.09284	1.36954	1.18314	3.90682	14.3525	3.91056
Os07G0526600	Alpha/beta hydrolase fold-3 domain containing protein.	0	0	0	3.5254	0	0.0403946	0.0329985	1.65573	19.168	0.257872	0	0	1.21471	1.74628	0.911597
Os07G0529600	Similar to Thiazole biosynthetic enzyme 1-1, chloroplast precursor.	0	0	2.0765	0	0	2372.66	3126.21	120.556	382.725	4.13205	3954.07	2917.56	26.0652	291.393	4.44037
Os07G0539900	Similar to Beta-1,3-glucanase-like protein.	0	0	0	1.7948	0	1.96883	2.46441	96.235	68.9711	16.8258	1.08273	7.64682	46.2604	20.8536	21.7549
Os07G0540600	Gnk2-homologous domain domain containing protein.	0	0	0	0	-1.8161	2.96841	2.37736	13.7438	6.88426	7.86478	7.72355	4.34598	11.2308	9.28598	30.3984
Os07G0543300	Similar to Beta-amylase.	0	2.0827	0	0	0	0.0883665	47.6434	1.02362	0.124426	0.188039	0.162862	11.2168	0.95957	0.727647	0.213664
Os07G0545800	Similar to Chitin-inducible gibberellin-responsive protein.	0	0	-1.6388	0	0	21.574	38.4904	18.3598	24.1273	14.3463	19.9366	21.635	52.1392	19.2433	19.1953
Os07G0559700	Similar to Monosaccharide transporter 3	0	1.1126	-1.7767	0	0	32.4726	63.9671	157.019	83.0841	35.2934	44.4313	29.5026	490.646	54.7056	42.5711
Os07G0563400	Protein of unknown function DUF761	0	0	-2.2107	0	0	2.77065	12.7502	6.46009	7.705	5.60098	4.2553	9.86982	27.2706	7.795	7.14583
Os07G0564500	Pyridine nucleotide-disulphide oxidoreductase, NAD-binding region domain containing protein.	0	0	0	0	-2.9924	0.634427	13.0112	4.84981	8.48653	1.13686	1.69236	4.30082	8.11647	11.5825	9.93062
Os07G0566150	Hypothetical conserved gene.	0	0	-3.5514	0	0	2.92223	29.7072	3.5683	10.1344	8.63657	3.09181	4.64678	38.1512	5.5701	6.19342
Os07G0573900	Hypothetical conserved gene.	0	1.9806	-1.4292	0	0	3.29298	98.7041	46.6095	134.822	90.9596	6.06904	24.9426	114.469	68.4412	93.0962
Os07G0574800	Tubulin alpha-1 chain.	0	1.0769	0	0	0	32.5261	88.3785	25.5547	62.2144	26.8337	41.325	41.7833	31.0969	55.9586	28.6895
Os07G0582400	Similar to Proton myo-inositol cotransporter.	0	0	-1.1403	0	0	7.37563	6.07971	32.3255	52.491	34.5146	5.1975	4.01828	64.9823	61.7989	24.8274
Os07G0583600	Chitin-inducible gibberellin-responsive protein.	0	0	-1.2292	0	0	118.947	155.854	93.5763	66.0703	70.5275	122.448	92.0812	200.063	106.777	80.4913
Os07G0605400	Similar to EGG APPARATUS-1 protein (ZmEA1).	0	0	-1.1759	0	0	394.865	59.6745	84.7374	625.481	180.715	202.907	20.6662	174.599	736.122	252.359
Os07G0617000	Similar to Ethylene response factor 2.	0	0	0	1.0366	0	4.54911	8.74618	28.0882	64.9282	2.24894	4.36143	7.33384	19.0763	33.2025	6.40706
Os07G0619600	Homeobox domain containing protein.	0	-1.5507	0	0	0	24.4971	8.81021	4.32451	3.60664	1.27042	19.0604	25.7403	1.38347	2.77522	4.00469
Os07G0622000	Serine/threonine protein kinase, Hyperosmotic stress response, Abscisic acid (ABA)-dependent gene regulation	0	1.0629	-1.24	0	0	42.3555	73.4786	58.0988	98.9861	27.3644	44.4972	35.0775	125.145	85.5715	39.4785
Os07G0635900	Hydrophobic protein LTI6A (Low temperature-induced protein 6A).	0	1.2674	0	0	0	44.9269	246.867	77.8567	112.341	53.0754	54.6298	102.277	108.528	157.44	55.6884
Os07G0642200	Lipase, GDSL domain containing protein.	0	3.2175	0	0	0	0.561399	14.2169	0.454766	0.287451	0.162903	0.235153	1.52431	0.0426309	0.525318	0
Os07G0648266	Similar to 2-oxo acid dehydrogenase, lipoyl-binding site.	0	-1.676	0	0	-2.0331	6.2874	4.82773	6.64558	1.27612	2.02898	5.75912	15.3846	2.64961	1.34097	9.1154
Os07G0661400	Conserved hypothetical protein.	0	1.0735	-1.1396	0	0	115.456	371.768	106.09	255.824	72.9238	114.477	176.175	213.159	247.407	72.9971
Os07G0664900	Similar to Short-chain dehydrogenase/reductase (Fragment).	0	0	0	-5.8848	0	15.2633	4.9459	7.11764	0.179099	2.54422	14.8155	9.54481	12.9195	11.1021	4.34665
Os07G0669200	Similar to GTP1/OBG family protein.	0	-1.6524	0	0	0	50.9631	19.9146	9.73978	9.1763	3.08169	43.9127	62.4348	6.62452	15.2258	5.22469
Os07G0671000	Similar to FPF1	0	0	0	1.6933	0	273.493	41.4687	84.7203	516.296	48.0289	172.031	107.415	85.22	167.474	77.8297
Os07G0673400	Rossmann-like alpha/beta/alpha sandwich fold domain containing protein.	0	0	0	1.7302	0	21.5326	42.9846	16.895	148.079	5.86433	22.9577	33.0613	30.2022	46.8233	4.79772
Os07G0673900	Hypoxia induced protein, Early stage of hypoxia signalling	0	0	0	3.355	0	1.03637	2.38591	4.61735	120.125	0.902179	0.955025	1.58284	3.62013	12.3159	1.97431
Os07G0676900	Similar to Peroxidase (EC 1.11.1.7).	0	-2.3601	1.34	0	0	14.332	10.5762	45.9556	23.2938	10.0903	8.34649	54.1534	16.5555	16.8359	10.263
Os07G0677100	Peroxidase	0	-3.5353	0	2.0453	0	5.11723	36.5135	409.775	222.89	56.5013	2.69462	422.202	214.944	56.6489	87.2428
Os07G0677200	Peroxidase. (Os07t0677200-01);Similar to Peroxidase.	2.2381	-4.0982	1.57	2.1333	-1.5703	68.9021	1.05504	243.571	269.917	51.255	14.5792	18.0212	74.8152	64.5402	167.069
Os07G0677500	Similar to Peroxidase precursor	0	0	0	2.3614	0	0.94394	0	12.5281	125.743	16.6506	4.44082	0.139109	2.69743	25.6707	36.2377
Os07G0678300	Similar to CBL-interacting protein kinase 29.	0	1.349	-1.2009	0	0	17.5677	55.4786	39.1349	47.5456	27.3899	13.8761	21.7204	82.0432	43.4449	31.904
Os07G0680400	WRKY transcription factor, Drought tolerance	0	0	0	0	-1.0087	10.2128	3.67447	33.247	97.4952	18.1232	5.13028	4.78324	33.5687	64.1346	40.0269
Os07G0680600	Protein of unknown function DUF3133 domain containing protein.	0	1.6802	-2.9666	0	0	2.72686	22.0188	4.33004	7.55616	2.23177	3.73703	6.85222	30.8666	7.08887	1.94419
Os07G0681400	Similar to Calcium-binding protein CAST.	0	0	-1.5945	0	0	8.84859	17.7254	39.6976	18.8517	57.3883	8.29589	10.1979	109.327	28.67	42.4804
Os07G0683200	Similar to NAC domain transcription factor.	0	0	0	1.9058	0	3.05571	1.32916	1.34374	21.0104	3.29341	0.987385	0.333356	0.662976	5.88203	4.95765
Os07G0683900	Ricin B-related lectin domain containing protein.	-1.439	0	0	0	0	152.008	181.012	128.575	118.552	293.519	411.411	290.731	115.716	93.9654	269.44
Os07G0685700	Transcription factor, Response to ethylene stimulus, Wound signaling	0	0	-1.4601	0	0	49.4832	131.388	99.2501	142.704	75.1981	44.3661	72.2404	249.015	118.075	81.6958
Os07G0687900	WSI76 protein induced by water stress.	0	0	0	1.6459	0	18.4292	11.5573	15.6752	266.213	16.043	10.121	7.16704	17.1822	89.2416	11.2151
Os07G0695800	Similar to 2-oxoglutarate dehydrogenase, E1 component.	0	0	0	0	-1.2887	16.235	15.4261	13.1553	31.8383	7.48869	15.7743	19.7309	8.5833	16.0544	20.0822
Os08G0101700	Similar to Cytochrome b561	0	0	0	-1.4374	0	53.7086	42.6185	109.261	38.9372	90.3737	68.6799	36.2717	113.64	110.626	101.355
Os08G0114300	D-arabinono-1,4-lactone oxidase domain containing protein.	0	0	0	0	-2.3068	0.699636	3.03953	13.4886	12.4486	6.395	0.498195	4.24453	5.73785	9.91825	34.7305
Os08G0120600	Similar to Fructose-bisphosphate aldolase, cytoplasmic isozyme	0	0	0	0	-1.3887	16.2535	9.43504	36.4769	64.199	15.4103	10.8149	12.2144	29.3706	46.9775	44.2919
Os08G0126300	Similar to Glyceraldehyde-3-phosphate dehydrogenase	0	0	0	0	-1.2256	117.958	411.436	172.448	244.501	121.146	190.704	492.247	143.607	144.39	310.956
Os08G0138900	Conserved hypothetical protein.	0	0	0	-1.1654	0	346.567	268.926	556.406	473.694	1084.71	413.549	162.708	580.565	1114.61	877.288
Os08G0152366	Hypothetical protein.	0	-1.6331	0	0	0	21.2247	9.71248	27.8588	4.80531	35.8883	31.4078	30.0439	14.1245	8.06785	66.5809
Os08G0157500	Caffeic acid O-methyltransferase, Flavonoid 3'-O-methyltransferase	0	0	1.1341	1.8534	0	14.0243	126.949	425.982	402.697	351.494	14.1067	114.994	176.997	116.905	589.838
Os08G0162800	Acyl-CoA-binding protein , Stress response	-1.674	0	0	0	0	64.0069	557.857	292.439	147.472	222.384	203.883	439.544	362.713	114.157	208.908
Os08G0168000	Similar to Sesquiterpene synthase.	0	0	2.2287	1.7997	-2.2181	0.112315	0.0305835	19.4488	25.0664	13.5831	0.0344998	0	3.78397	7.55292	69.3708
Os08G0171700	Conserved hypothetical protein.	0	0	0	1.0556	0	154.919	274.095	81.0839	266.734	84.5775	123.311	183.669	83.5967	134.618	67.5547
Os08G0174700	Similar to SERK1	0	0	0	0	-1.0717	20.1853	17.49	47.6944	37.8389	29.1132	22.5062	27.551	38.9805	29.6774	67.1681
Os08G0187900	Ubiquitin-conjugating enzyme	0	0	1.7884	0	0	0.224245	0.183187	67.4049	0.210502	170.512	0.137763	0	17.7948	0	165.976
Os08G0191150	Non-protein coding transcript.	0	0	0	0	-1.3076	253.378	243.765	105.7	233.989	43.9774	291.693	228.321	70.3731	126.874	119.487
Os08G0191700	Glyoxalase I, Abiotic stress response	0	0	0	1.2083	-1.1248	42.9016	181.539	70.2776	71.0137	34.3072	76.8653	173.973	43.9105	32.2401	82.1219
Os08G0203600	Hypothetical conserved gene.	0	0	0	0	-1.3519	122.864	56.4377	151.331	145.459	30.3239	104.743	101.796	129.45	137.651	84.9597
Os08G0205800	Hypothetical conserved gene.	0	0	-2.4306	0	0	2.58564	34.0239	11.4576	8.80672	19.1829	3.41305	11.3491	56.3299	16.2561	12.898
Os08G0215200	Conserved hypothetical protein.	0	-1.0536	0	0	0	22.8503	12.5808	12.0924	10.2444	11.0088	22.0404	26.0441	7.95141	12.0626	14.0101
Os08G0230800	Hypothetical conserved gene.	0	0	0	0	-1.7025	0.585075	0.0995729	0.934066	2.93488	4.02032	0.247112	0.13652	0.549806	2.00739	14.3628
Os08G0232700	Exo70 exocyst complex subunit family protein.	0	0	-1.6928	0	0	14.9926	22.134	10.7304	18.4612	6.50237	19.0314	13.9933	31.6354	36.2866	10.652
Os08G0237000	nsglycosylase/hydrolase protein 8 precursor (EC 2.4.1.207) (End-xyloglucan transferase) (OsXTH8) (OsXRT5)	0	1.3583	0	0	0	7.95981	108.88	28.8885	36.5282	20.0289	12.7962	42.3523	63.4312	32.1741	14.4698
Os08G0293100	Conserved hypothetical protein.	0	0	-2.5335	0	0	14.607	50.8846	8.75198	19.2674	10.6289	17.4058	25.6998	46.2107	30.8477	8.9988
Os08G0307400	Similar to Phosphatidylinositol 3-kinase 1	0	-1.4744	1.6784	0	0	46.2519	18.6761	30.0198	23.326	19.864	43.3721	51.7552	8.55326	32.1469	31.6139
Os08G0320400	Similar to Indole-3-glycerol phosphate synthase-like	0	0	0	1.274	0	27.7282	23.2218	27.2699	60.8207	14.3358	30.3594	25.9568	17.0881	26.3843	22.2158
Os08G0323400	Similar to Rubredoxin (Rd).	0	0	0	0	1.224	324.593	218.21	118.217	120.525	189.422	315.699	264.833	94.074	185.856	89.006
Os08G0331800	Conserved hypothetical protein.	0	0	1.6316	0	0	1.04861	2.85537	80.3562	348.539	27.6442	1.07367	2.39241	23.6495	210.829	41.788
Os08G0351200	Hypothetical conserved gene.	0	1.2533	0	0	0	7.85598	54.4211	58.4865	16.3714	5.89276	24.9759	22.767	80.616	21.8327	19.2168
Os08G0351300	Conserved hypothetical protein.	0	-4.0892	0	0	0	81.5578	0.741454	6.50312	61.5666	3.70513	43.9024	12.5861	8.30876	51.5735	6.16579
Os08G0356700	Protein of unknown function DUF247, plant family protein.	0	0	0	-1.6322	0	15.366	17.4597	8.69431	7.29001	6.95624	10.857	10.3149	20.2925	23.7072	11.5821
Os08G0374600	receptor protein kinase CRINKLY4	0	4.5539	0	0	0	0.22272	26.9272	0.396915	0.784013	0.118483	0.102619	1.14331	9.58101	1.03161	0.448767
Os08G0384500	ABC transporter-like domain containing protein.	0	0	0	1.1386	0	12.7809	14.2374	46.7278	75.8032	12.6095	14.514	9.03716	39.857	36.1176	21.5179
Os08G0389700	Conserved hypothetical protein. Protein of unknown function DUF81	0	1.9004	0	0	0	125.956	213.497	149.929	150.739	47.5011	113.853	57.037	195.772	187.659	47.6199
Os08G0398000	ABC transporter-like domain containing protein.	0	0	0	0	-1.9349	7.18921	6.23081	11.357	9.67426	3.68683	6.44143	9.70261	8.66677	9.59318	15.4729
Os08G0406150	Non-protein coding transcript.	0	0	0	0	-1.797	26.6808	13.2858	41.2972	17.512	25.6732	22.0399	31.3514	28.0581	15.3178	97.9249
Os08G0409100	Trehalose-6-phosphate phosphatase.	0	1.3589	0	0	0	8.58568	35.9112	42.5532	4.51401	72.2559	19.2192	13.9633	63.3446	6.97877	55.5666
Os08G0422000	Similar to CM0545.530.nc protein	1.313	0	0	0	0	84.3122	44.5558	67.9634	41.4594	64.1195	33.8746	34.8168	48.0703	25.759	48.163
Os08G0422600	Conserved hypothetical protein.	2.5557	2.0349	2.4245	2.0597	2.3262	109.939	52.0336	25.3705	67.2217	33.0721	18.6656	12.663	4.30966	16.9151	7.23859
Os08G0422800	Conserved hypothetical protein.	7.4839	5.3992	5.3696	5.615	5.629	48.5224	23.687	24.2674	26.8227	26.4771	0.270584	0	0	0	0
Os08G0423600	Similar to carbonic anhydrase.	0	0	0	0	-5.6603	0	0	10.7979	5.83733	0	0	0.132284	1.59825	0.875302	28.6721
Os08G0424500	Betaine aldehyde dehydrogenase, Rice fragrance	0	0	0	0	-1.0706	73.5335	135.628	58.0849	86.9727	34.0085	85.7365	122.309	61.458	82.51	78.4017
Os08G0433600	Protein of unknown function DUF962 family protein.	0	0	0	-1.0843	0	147.765	232.442	105.915	152.875	83.404	239.003	215.098	88.2608	340.044	109.018
Os08G0434300	Similar to Malate dehydrogenase precursor	0	0	0	1.1533	0	17.1344	87.631	59.8171	77.5395	65.1752	21.5597	55.7694	69.454	36.5719	81.0207
Os08G0441500	Similar to Cinnamoyl-CoA reductase.	0	0	0	1.2818	0	0.725249	14.346	85.9503	158.067	101.03	1.43213	8.65478	51.9261	68.1981	157.907
Os08G0445700	HAD-superfamily hydrolase subfamily IIB protein.	0	0	-2.5441	0	0	6.94047	14.6096	3.26592	12.6093	1.24457	6.85085	6.91459	17.3705	20.388	2.32553
Os08G0447000	Similar to D-3-phosphoglycerate dehydrogenase	0	0	0	1.2162	0	33.5711	92.8997	69.4181	217.419	29.8844	35.3978	61.7142	43.196	98.1703	39.8457
Os08G0450700	Chaperonin Cpn60/TCP-1 family protein.	0	-1.1183	0	0	-1.9539	21.1761	17.9778	21.4452	3.94343	6.07483	15.2516	38.9222	9.93092	3.83114	25.8341
Os08G0465800	Similar to Glutamate decarboxylase.	0	0	-1.0762	0	0	43.1939	114.944	92.9327	96.1784	86.8411	34.0431	93.486	178.69	58.7099	105.977
Os08G0470700	Similar to carbonic anhydrase.	0	0	0	0	-6.5787	0	4.63016	18.009	6.09066	0.317395	1.23704	19.0724	5.6066	0.921161	33.2999
Os08G0474000	Similar to AP2 domain containing	0	5.8733	-10.29	0	0	0.0785127	81.8393	0.0699599	0.276379	0	0	1.39232	79.879	0.161627	0.189838
Os08G0478700	Similar to Mitochondrial uncoupling protein 4.	-1.39	0	0	0	0	48.5241	936.222	1009.09	359.297	1029	126.951	585.957	1354.72	370.633	1192.79
Os08G0482600	Cupredoxin domain containing protein.	0	3.5388	0	0	0	0.0787014	46.2256	20.267	27.0394	1.25604	0	3.96662	53.8409	9.88292	1.58579
Os08G0487800	Similar to Heat-shock protein precursor.	0	-1.4442	0	0	0	32.1578	10.8764	5.22958	6.915	5.16061	24.1584	29.5164	2.08653	6.01592	14.2297
Os08G0490100	Similar to PBF protein.	0	1.1641	-1.2416	0	0	8.51598	67.192	51.915	30.6358	43.7568	12.0106	29.9034	111.95	22.6621	45.3672
Os08G0498100	Similar to Caffeoyl-CoA O-methyltransferase 2 (EC 2.1.1.104)	0	0	0	1.5798	0	25.0697	175.246	604.793	624.136	277.149	18.9216	177.719	367.362	219.029	346.669
Os08G0498400	Similar to Caffeoyl-CoA 3-O-methyltransferase	0	1.5105	0	0	0	17.685	52.6311	20.0441	20.8808	7.03612	21.6061	18.4234	35.9894	21.1941	7.63157
Os08G0504700	Gibberellin-induced A20/AN1 zinc-finger protein	0	1.2356	-1.2843	0	0	83.7979	337.486	212.196	436.754	191.216	106.992	142.934	471.338	354.544	183.665
Os08G0507100	Cytochrome P450 family protein.	0	0	0	0	-2.506	0.0794173	0.194629	5.87357	4.97623	2.74617	0	4.15095	1.52577	1.63489	17.1223
Os08G0508800	Lipoxygenase, chloroplast precursor	0	-3.2732	0	1.5123	-1.1593	3.9886	0.695785	77.0241	156.465	10.5652	1.34004	6.70872	49.75	57.5408	25.9019
Os08G0509100	Similar to Lipoxygenase, chloroplast precursor	0	0	0	0	-1.7064	11.5459	0.671862	70.6923	166.272	16.1213	2.53604	3.63149	41.3783	87.6177	57.7465
Os08G0520550	Similar to Auxin response factor 21.	0	0	0	0	-1.4491	14.5617	17.9871	17.8804	9.5084	7.79767	14.7459	30.6771	10.5328	7.37889	23.3695
Os08G0537001	Conserved hypothetical protein.	0	-2.2313	0	0	0	9.81841	2.73127	2.83236	0.994606	4.1335	8.72232	12.79	1.57341	1.96306	5.1048
Os08G0544800	PCF2	0	0	-1.3354	0	0	24.5143	36.6093	19.6053	30.6953	15.6064	19.5284	19.9684	45.117	30.4877	12.4426
Os08G0557600	Similar to Monodehydroascorbate reductase (EC 1.6.5.4) (MDAR) (Ascorbate free radical reductase)	0	0	0	1.1338	0	36.4017	83.8477	57.1864	144.487	111.458	48.8921	78.8372	43.1854	69.0735	228.415
Os08G0560000	Similar to gibberellin 20 oxidase 2	0	0	0	1.8215	0	15.5641	29.2656	26.9165	45.1922	2.35167	27.2846	12.9365	14.8086	13.4133	3.82266
Os09G0115500	Proteinase inhibitor I3, Kunitz legume domain containing protein.	0	0	-1.0124	0	0	81.767	175.395	114.683	100.49	115.45	102.122	112.935	210.968	87.9009	123.955
Os09G0127300	NAD(P)-binding domain containing protein	0	0	0	1.9776	-1.9317	0.162581	6.9395	50.1976	140.732	7.69768	0.786558	5.15933	41.2508	37.4853	32.235
Os09G0247700	Similar to Zinc finger, ZZ-type; Zinc finger, C2H2-type.	0	1.78	0	0	0	125.58	126.983	81.4868	230.63	134.205	113.33	36.8769	112.025	245.727	66.3798
Os09G0268100	Similar to lectin-like receptor kinase 7.	0	0	0	-1.8642	0	20.81	3.29736	2.53101	6.84132	4.64455	12.564	3.06972	3.27174	26.1284	8.43435
Os09G0268600	Zinc finger, SWIM-type domain containing protein.	0	0	0	-4.4743	0	6.28269	0.0162932	2.52367	0.280841	0.0848837	3.96999	0.558471	0.316544	6.5489	0.40188
Os09G0271100	Conserved hypothetical protein.	0	0	-1.1435	0	0	57.3096	29.376	71.2593	95.013	105.898	107.381	20.6501	143.563	96.8006	122.613
Os09G0272600	Conserved hypothetical protein.	0	0	0	2.1263	0	1.92183	406.17	145.805	348.118	19.7174	1.012	208.202	107.671	83.6473	8.40859
Os09G0286600	Pathogenesis-related transcriptional factor and ERF domain containing protein.	0	0	0	1.6666	0	6.97236	25.1769	103.367	51.9336	22.3089	9.35832	13.9584	74.0668	17.1616	33.8802
Os09G0287000	Similar to Ethylene-responsive transcription factor 5	0	0	0	1.47	0	128.002	44.7929	42.9561	66.8804	3.65019	118.555	59.183	23.8644	25.3276	7.24642
Os09G0314200	Disease resistance protein domain containing protein.	0	0	0	0	-1.2055	15.2998	8.56888	16.7675	10.5627	7.19229	11.7556	11.2341	14.2314	16.2061	18.2065
Os09G0332700	Similar to PDR-type ABC transporter 2 (Fragment).	1.239	0	0	1.0355	0	45.8393	16.4541	18.2992	62.4255	10.1433	19.3868	15.2203	18.0522	31.9469	10.8612
Os09G0333000	ABC transporter-like domain containing protein.	-5.1649	-5.0357	0	-5.0687	0	0	0	0	0	0	7.15126	6.53587	1.13494	6.85816	1.60052
Os09G0334500	WRKY transcription factor, Tolerance to phosphate starvation, Regulator of Fe starvation and cold stress	0	1.6912	-2.1867	0	0	9.90608	26.9328	23.0387	33.3632	20.1029	9.93922	8.31768	95.6532	33.7385	32.4603
Os09G0336600	Non-protein coding transcript.	-10.41	-10.472	-9.1232	-10.901	-8.5968	0.0977307	0.0798367	0.174169	0.0688059	0.207965	132.748	113.109	88.574	138.016	88.3783
Os09G0337300	Ankyrin repeat containing protein.	-8.8676	-9.4559	-7.1844	-5.6593	0	0.0436531	0.0356604	0.0777954	0	0.0464455	20.3548	24.9758	10.3192	17.254	2.84985
Os09G0337500	Conserved hypothetical protein.	2.8678	2.6848	0	0	0	10.2612	10.0091	4.80132	7.96647	3.61428	1.40326	1.55248	1.48725	1.61563	1.24621
Os09G0346500	Similar to Chlorophyll a-b binding protein, chloroplast precursor (LHCII type I CAB) (LHCP).	-1.0095	0	0	0	0	295.401	189.775	4949.34	145.435	6400.39	593.671	254.862	6112.55	89.3546	4616.4
Os09G0347300	Exo70 exocyst complex subunit family protein.	0	0	0	0	-2.9089	0.421284	0.442477	0.723969	0.720312	1.08857	4.60316	3.76353	5.0523	6.75222	8.97368
Os09G0356200	Malectin-like carbohydrate-binding domain domain containing protein.	6.3624	8.1303	3.4268	2.9388	6.12	32.5683	11.2446	15.6278	24.6802	19.7097	0.395155	0.0400231	1.3253	3.37653	0.311051
Os09G0358000	Similar to OsD305.	-9.4658	-5.4372	0	-3.5544	0	0.112508	0	1.80453	7.36649	0.95764	79.4169	37.1732	25.8441	90.7908	20.1306
Os09G0369400	Similar to predicted protein.	0	1.3909	-1.8801	0	0	18.8957	72.8287	56.4632	112.199	41.8729	26.411	27.6972	189.545	72.8806	40.1349
Os09G0379900	Similar to Beta-glucan binding protein.	0	1.644	-2.7774	0	0	5.41013	34.8412	12.1708	9.85538	10.5057	5.18671	11.118	76.0954	6.89215	15.2909
Os09G0396900	Protein of unknown function DUF125, transmembrane family protein.	0	0	0	1.3993	-1.7885	16.3874	64.8752	25.2107	83.9167	13.4866	12.3262	30.0674	39.0766	33.3748	51.1381
Os09G0407950	Similar to transducin family protein / WD-40 repeat family protein.	0	-1.2948	0	0	-1.447	9.44585	8.41496	9.24816	3.65352	4.61147	9.81491	20.5895	4.07497	2.24061	13.8007
Os09G0409950	Hypothetical conserved gene	0	0	0	-1.0863	0	27.3344	31.6636	28.1943	51.1741	22.9111	27.8618	26.9892	35.0932	113.989	29.1148
Os09G0412700	Conserved hypothetical protein	0	0	0	1.5119	0	162.589	311.877	242.385	669.856	190.938	132.442	160.661	355.057	246.403	238.561
Os09G0417600	WRKY transcription factor, Transcriptional repressor, Pathogen defense	3.6029	3.2201	0	0	0	20.6961	16.092	87.6753	523.812	22.1262	1.70037	1.72221	351.418	418.814	63.3058
Os09G0417800	WRKY transcription factor, Transcriptional repressor, Pathogen defense	4.3209	0	-1.2799	0	0	20.3042	0.809101	49.6681	268.038	14.0507	1.01412	0.256787	109.989	402.124	30.1571
Os09G0418000	Similar to CBL-interacting protein kinase 16.	0	0	0	1.4826	0	14.5855	19.1219	8.1377	73.7849	22.924	8.04809	37.7367	9.77631	27.6985	18.7231
Os09G0423300	Pentatricopeptide repeat domain containing protein (PPR).	0	-1.2208	0	0	0	33.2942	19.3558	9.02239	7.35463	10.4006	32.8591	44.9922	4.97232	9.97158	9.19563
Os09G0425900	Similar to senescence-associated protein DH.	0	0	-1.1248	0	0	230.961	306.322	302.298	376.593	159.978	198.068	213.851	601.18	383.34	206.956
Os09G0434500	Similar to Ethylene response factor 2.	0	0	0	1.2484	0	52.5555	166.152	183.422	204.21	79.5463	104.851	133.034	215.161	90.1731	138.085
Os09G0439200	Jasmonate ZIM-domain protein, Jasmonate-induced resistance to bacterial blight, Repressor of jasmonic acid signaling	0	1.3786	0	0	0	3.0572	44.636	10.5995	12.8751	4.49473	3.1758	17.1206	17.0401	10.4702	5.95846
Os09G0442100	Protein kinase, core domain containing protein.	0	2.8381	0	0	0	2.03583	12.8813	5.83795	7.45313	3.42631	2.62645	1.79649	8.1935	6.51504	9.30796
Os09G0442600	Similar to Plastid (P)ppGpp synthase.	0	0	0	1.2846	0	17.9125	21.5577	36.967	50.1912	40.7939	19.5429	19.8499	54.6955	21.6131	35.8029
Os09G0443400	Hypothetical conserved gene.	0	0	-8.0828	0	0	0	0	0.127394	0	0.0380285	1.51509	1.50119	31.4977	6.95321	6.7409
Os09G0448200	Similar to High-affinity potassium transporter.	0	0	0	0	-1.2145	10.2394	4.54691	29.9687	47.819	10.1681	6.96792	7.54752	22.3475	38.1311	25.9008
Os09G0454600	Similar to Mitochondrial phosphate transporter	0	0	0	0	-1.2699	5.9125	15.7989	56.7217	97.6853	30.9245	6.72144	10.8306	67.3885	67.2845	81.8568
Os09G0457900	AP2/ERF transcription factor, Regulation of the internode elongation	0	0	-6.4104	0	0	0	10.844	0.212169	0.251454	0.12667	0	0.388916	16.4584	0	0.671681
Os09G0472900	Similar to Blight-associated protein p12 precursor.	0	-2.1036	0	0	0	3.00446	24.1105	4.64567	27.7471	5.07704	12.3775	103.343	9.15282	40.8392	11.5378
Os09G0474000	bZIP transcription factor, bZIP-1 domain containing protein.	0	0	0	0	-2.4964	0.156463	3.13147	22.8646	11.8968	5.66003	0	3.65085	13.9843	3.54304	35.0572
Os09G0474300	Similar to Heat-shock protein precursor	0	-1.4836	0	0	0	101.938	25.9118	9.35403	18.3729	15.9455	72.333	72.2676	6.93163	32.2289	28.8544
Os09G0484200	Hypothetical protein.	-1.5567	0	0	1.2468	0	41.1675	322.593	52.5326	393.736	85.04	120.895	166.092	48.921	174.052	133.033
Os09G0486500	A20/AN1 zinc-finger protein, Response to multiple biotic stresses, Regulation of abiotic stress responses	0	1.4476	-1.6391	0	0	14.1496	170.985	129.167	189.222	102.581	27.9507	62.5203	366.9	119.38	76.19
Os09G0491756	U2 snRNP auxiliary factor, small subunit. (Os09t0491756-01);U2 snRNP auxiliary factor, small subunit.	0	0	0	0	1.0745	176.258	80.7983	30.5907	85.748	533.753	138.271	76.2723	23.9565	139.244	278.188
Os09G0491852	NAD(P)-binding domain containing protein.	0	-1.2025	0	0	0	89.5197	33.4737	47.7047	57.1901	128.163	89.4193	76.8265	34.0557	68.299	108.247
Os09G0497400	Protein of unknown function DUF850,	0	0	-1.1657	0	0	115.025	104.873	93.9293	150.608	82.7097	104.629	93.5696	192.162	155.912	94.6309
Os09G0517200	Hypothetical conserved gene.	0	0	0	-1.0444	0	0.112161	0.311524	3.71787	15.7299	3.84262	0.0413431	0.376867	6.23967	34.0339	11.8784
Os09G0518000	Similar to indole-3-acetate beta-glucosyltransferase	0	0	-2.2956	1.8638	-2.3562	2.00403	6.9399	10.0544	58.0314	5.74775	0.642344	1.42318	45.0155	16.7262	32.304
Os09G0522000	Similar to Dehydration-responsive element-binding protein 1B.	0	5.5318	-5.9939	0	0	0.148144	51.3122	2.11209	4.90203	0.157621	0.682582	1.10616	122.756	3.35466	0.477601
Os09G0522100	Similar to Dehydration-responsive element-binding protein 1H.	0	0	-6.9705	0	0	0	8.08495	0.236221	0.870985	0.0940193	0	0.494861	27.0156	0.636691	0.0712212
Os09G0522200	DRE-binding protein 1A.	0	4.4887	-3.9959	3.1496	0	0.427041	37.3853	4.62967	84.2828	0.378632	0.262349	1.66074	67.3587	9.96322	0.28682
Os09G0525900	Peptidase S54, rhomboid domain containing protein.	0	0	-1.2311	0	0	32.636	75.6158	54.9252	50.9584	66.4664	39.4459	40.2915	117.582	66.9176	66.3241
Os09G0535900	Similar to Ki1 protein.	0	1.0326	0	0	0	90.1622	129.65	79.6462	66.0481	57.2368	123.372	63.2055	74.6624	98.0156	49.8321
Os09G0536700	Nodulin-like domain containing protein.	0	1.1217	0	0	0	11.4468	36.3503	3.4068	18.8259	0.857682	14.5598	16.66	9.38846	19.7003	0.705398
Os09G0537700	S-like ribonuclease, Salinity tolerance, Abiotic stress	0	1.0353	3.2869	-2.8693	2.7811	81.9106	1610.51	518.206	15.9114	185.284	43.9606	783.667	48.4198	121.971	29.5874
Os09G0538000	Ribonuclease T2 family protein.	0	1.9901	0	0	0	3.59613	57.1015	18.2917	1.10767	3.74646	0.621352	14.3348	1.37677	6.55475	0.603832
Os09G0539100	Similar to 3-dehydroquinate synthase-like protein.	0	0	0	1.1676	0	8.09076	28.9646	84.3922	72.9055	86.252	10.3795	35.6475	68.6427	34.0461	102.641
Os09G0555500	Similar to Chloroplast phytoene synthase 3.	0	1.6541	0	0	0	9.96524	27.6638	11.905	49.6079	36.8749	7.80156	8.76603	29.6129	52.1486	24.2729
Os09G0556500	Cysteinyl-tRNA synthetase, class Ia family protein.	0	-1.0296	0	0	0	48.1899	21.1861	10.5818	9.70858	10.821	34.2635	43.1353	5.54701	13.9169	10.7045
Os09G0557800	Similar to transmembrane 9 superfamily protein member 4.	0	0	0	0	-1.1088	47.1712	56.9393	64.7186	47.2525	26.0339	42.3572	72.0115	45.2677	35.2067	61.6286
Os09G0563200	Similar to Potassium transporter 11	0	0	0	0	-1.0682	15.6454	27.2262	41.0161	9.7556	20.1392	18.632	34.6785	21.4281	8.15677	46.3514
Os09G0564000	Peptidase C1A, papain family protein.	0	1.1455	0	1.3275	-2.0477	203.084	470.677	432.024	877.948	44.7941	296.069	212.183	553.316	366.996	203.281
Os09G0571200	C2 domain containing protein.	0	0	0	1.5783	0	1.98223	23.2098	68.9443	119.832	29.2452	1.21776	12.8274	90.5704	42.0984	56.0767
Os10G0100700	Vitamin B6 biosynthesis protein family protein.	0	0	1.0297	0	0	12.3849	26.839	194.505	33.3841	412.336	37.7787	34.1432	86.8806	53.175	255.048
Os10G0101200	Serine carboxypeptidase, Regulation of grain filling and seed germination	0	-1.0516	0	0	0	36.2851	29.7062	21.5314	49.1119	82.1015	40.0078	61.4111	17.2061	48.4795	74.8044
Os10G0109300	Similar to Peroxidase	0	2.8323	0	0	0	1.01806	21.2828	1.64937	0.879646	0	0.980795	2.98018	2.78309	5.57286	0.0372968
Os10G0109600	Peroxidase (EC 1.11.1.7).	0	0	0	2.9681	0	0.110888	10.9155	2.42081	58.3178	0.353946	0	7.55532	0.741006	7.81843	0.26812
Os10G0144700	Cytochrome P450 domain containing protein.	0	0	0	-2.1983	0	16.3498	3.05942	0.93297	8.70399	0.771236	17.4415	1.80414	2.42194	41.9063	3.31061
Os10G0148400	Similar to POT family protein.	0	0	0	-1.1644	0	38.0191	69.1966	19.835	28.6807	17.2704	56.637	52.1061	14.5131	67.4388	21.9102
Os10G0159800	Alcohol dehydrogenase superfamily, zinc-containing protein.	0	1.0232	0	0	0	40.0763	130.057	48.5183	65.5308	53.0477	56.7529	63.817	37.7699	54.7611	106.113
Os10G0180800	Wall-associated kinase, Negative regulation of rice blast resistance	0	-2.5712	-1.365	0	0	47.0253	2.09062	50.0266	86.9072	15.8269	28.9265	12.391	117.508	100.634	14.6481
Os10G0210500	Protein of unknown function DUF6, transmembrane domain containing protein.	0	0	0	2.6166	0	20.2816	24.5472	21.5369	51.6626	9.6973	8.02625	19.8879	8.26279	8.83702	15.3436
Os10G0320100	Similar to Flavonoid 3'-monooxygenase (EC 1.14.13.21) (Flavonoid 3'-hydroxylase) (Cytochrome P450 75B2)	-4.8469	0	1.5786	-3.9443	0	0.80839	100.033	30.0972	2.15282	62.5631	23.2227	159.136	9.18931	34.7664	99.3744
Os10G0356000	Similar to ribulose-1,5-bisphosphate carboxylase/oxygenase large subunit.	0	0	0	-1.9519	0	14.0183	13.5405	20.1812	8.32629	17.0041	19.0615	13.1266	18.537	33.7931	14.3898
Os10G0370700	Similar to Nitrate transporter	0	-1.8561	0	0	0	6.84083	4.12427	3.44704	1.03094	2.32538	7.63316	14.8912	1.02235	1.37226	2.18428
Os10G0376200	Leucine-rich repeat, typical subtype containing protein.	-1.0759	0	0	0	0	20.8828	61.511	64.1789	35.183	50.7106	43.9447	51.2729	76.1962	47.3739	63.1164
Os10G0376900	Helix-loop-helix DNA-binding domain containing protein.	0	0	0	2.9692	0	1.07264	3.90326	4.17071	21.7284	0.570626	0.898589	3.27647	1.14034	2.91072	0.982408
Os10G0391400	Tify domain containing protein.	0	5.8017	-4.3317	0	0	0.158355	86.8009	1.19938	3.28887	0.673938	0.0729628	1.5519	22.0237	3.58588	0.765779
Os10G0392400	Tify domain containing protein.	0	2.4875	-1.8992	0	0	4.32279	303.113	37.0665	92.9483	13.4963	4.44062	53.9058	126.084	50.111	29.5288
Os10G0394100	Metallophosphoesterase domain containing protein.	0	-1.0945	0	0	0	76.0738	35.8581	30.3496	41.1972	95.6183	78.8316	76.3633	25.2526	58.6338	55.3818
Os10G0419400	Similar to SIPL. (Os10t0419400-01)	0	0	0	2.3666	0	1.89374	14.756	23.5593	80.7134	5.0372	1.67798	8.22575	17.2787	16.4185	10.5667
Os10G0430200	Similar to Sinapyl alcohol dehydrogenase	-1.3559	0	0	-1.5346	0	20.7915	160.839	223.16	40.6504	438.024	53.1243	104.169	231.751	123.54	557.818
Os10G0442532	Hypothetical gene.	0	0	0	0	-1.4425	37.3155	55.596	47.1299	32.9774	27.0248	41.4774	80.569	26.0217	17.7242	80.6225
Os10G0450900	Similar to Glycine-rich cell wall structural protein 2 precursor.	0	-1.039	1.148	1.3477	0	13.3419	127.021	192.571	57.2679	106.105	10.0284	260.3	79.2443	23.6052	150.347
Os10G0465700	Similar to Beta-amylase PCT-BMYI (EC 3.2.1.2).	0	0	0	0	1.2955	1.32953	1.407	17.232	0.744577	211.963	1.16949	2.48184	12.3929	1.524	94.7855
Os10G0469900	TGF-beta receptor, type I/II extracellular region family protein.	0	0	0	-1.2765	0	19.5046	30.2325	28.4252	19.8937	36.2594	26.1376	22.6057	25.5425	50.5579	46.3832
Os10G0479500	Similar to carboxy-lyase	0	2.0659	0	0	0	9.04173	44.9527	14.2076	89.6331	3.10326	17.2017	10.7077	11.8568	58.4419	6.58218
Os10G0490800	Similar to Secretory protein.	0	0	0	2.9447	0	57.1874	26.0056	25.309	167.758	120.373	65.5223	36.2066	38.2152	22.8585	98.9434
Os10G0491000	Plant Basic Secretory Protein family protein.	0	0	0	4.6997	0	66.474	32.1193	16.9041	117.027	97.2589	79.7957	57.0457	40.8299	4.72418	125.772
Os10G0492900	Similar to alpha-galactosidase	0	0	0	-1.3117	0	30.3654	47.0979	39.9307	34.6574	75.9306	16.6413	28.0294	58.1594	90.2545	39.999
Os10G0505700	Similar to Nonspecific lipid-transfer protein 2	0	1.4359	0	0	0	263.741	330.94	148.476	351.111	400.974	374.517	121.988	228.351	490.547	266.812
Os10G0508700	Pectinesterase inhibitor domain containing protein.	0	1.6561	0	0	0	4.58197	146.936	4.32021	13.3911	0.056687	8.78836	46.4954	9.25685	21.2779	0.214707
Os10G0509401	Conserved hypothetical protein.	0	1.5089	0	-1.8519	1.1083	60.6613	230.009	244.615	31.8351	241.341	68.9928	80.603	144.169	120.554	122.876
Os10G0512400	Coniferaldehyde 5-hydroxylase	0	0	1.3209	0	-1.7131	1.4112	1.35776	29.5645	36.3633	13.3798	0.953653	2.45866	10.7924	21.4977	48.1496
Os10G0517500	Cys/Met metabolism, pyridoxal phosphate-dependent enzyme domain containing protein.	0	0	0	3.0985	0	26.3919	26.5253	16.3178	173.945	22.7589	22.1224	23.1247	12.7901	21.3045	13.8294
Os10G0521900	Similar to Membrane protein.	0	2.7668	-2.5613	0	0	0.316581	23.1893	4.37246	10.1041	2.18941	0.777956	3.39803	23.5354	4.72494	3.44462
Os10G0524300	Peptidoglycan-binding lysin domain domain containing protein.	0	0	0	1.3031	0	11.0345	81.4245	7.77954	218.719	5.80569	5.14009	49.4581	4.76053	92.9846	4.00699
Os10G0524600	Peptidase S8, subtilisin-related domain containing protein.	0	3.5248	-4.0853	0	0	2.47385	11.9359	0.895519	2.66694	1.91924	3.37202	1.03422	13.8622	3.8195	1.43309
Os10G0525400	Similar to Glutathione S-transferase GSTU31	0	0	0	-1.3804	0	22.9604	67.3842	29.621	26.3973	15.7926	31.2031	35.7167	33.5793	72.0931	20.4371
Os10G0536400	Similar to Oxidoreductase, 2OG-Fe oxygenase family protein, expressed.	0	0	0	1.023	-1.1922	9.65237	38.0934	126.282	161.901	71.4031	10.3973	25.627	205.163	83.5765	179.088
Os10G0536450	Hypothetical protein.	0	0	-1.1475	0	0	19.6095	59.2987	206.205	362.583	157.394	15.6398	31.2534	416.586	215.415	256.019
Os10G0537800	Peptidase aspartic, catalytic domain containing protein.	0	0	0	2.2919	-1.4846	0.0466379	0.0380987	16.7061	80.4451	11.7602	0.0429774	0	8.06408	17.2336	36.123
Os10G0543500	Six-bladed beta-propeller, TolB-like domain containing protein.	0	0	0	0	-1.5822	7.38927	0.690905	37.126	133.411	34.3842	3.07649	1.8696	19.0375	104.832	113.012
Os10G0550900	Proline oxidase domain containing protein.	0	0	-1.2753	0	0	3.75009	28.9228	36.7573	77.6271	57.7766	7.21643	17.3635	81.1373	70.35	84.5407
Os10G0555100	Similar to DNA chromosome 4, ESSA I CONTIG fragment NO. 6	0	1.886	-2.0559	0	0	1.83802	19.8679	4.53319	10.8606	1.78099	2.60113	5.36099	17.19	5.43916	2.06338
Os10G0559700	Similar to Agenet domain containing protein, expressed.	0	-1.5304	0	0	-1.7956	23.1546	15.6413	19.3792	5.52738	8.2036	22.1363	45.06	8.86795	3.69074	31.2607
Os10G0565150	Hypothetical gene.	0	0	-1.2464	0	0	36.2101	41.1505	24.346	67.746	16.1056	33.7442	46.1662	52.6756	87.8279	13.6683
Os10G0569800	Similar to RIR1b protein.	0	0	-1.7911	0	-1.0139	57.8171	27.2195	88.5543	1089.23	512.383	47.1809	4.22606	279.49	720.707	1135.69
Os10G0570200	Similar to RIR1b protein precursor.	0	0	0	2.1023	0	420.236	6.35532	75.4461	3009.37	246.529	594.56	21.4206	49.3884	735.242	256.977
Os10G0572500	Zinc finger, RING/FYVE/PHD-type domain containing protein.	0	-1.5758	0	0	-1.4811	8.9598	6.16944	11.1917	3.27788	5.76009	8.30645	18.3422	5.38137	2.14538	17.6498
Os10G0576600	Tetratricopeptide-like helical domain containing protein.	0	0	0	3.0213	1.5414	7.891	39.0614	28.3584	199.411	63.1074	6.83824	57.2621	17.1987	25.7652	23.7972
Os10G0580400	High-affinity urea transporter, Effective urea acquisition and utilisation,	0	0	0	1.5572	0	10.7613	7.53508	25.6558	68.3887	19.5171	7.87568	18.1181	22.8968	24.3792	27.721
Os10G0580900	Conserved hypothetical protein.	0	1.4507	0	0	0	9.5152	76.7073	46.9115	59.7184	18.8491	12.8641	27.9868	85.9127	40.7225	34.9647
Os11G0102200	Similar to NPH1-1.	0	-1.8428	0	0	0	19.1619	5.61795	11.5925	7.31089	1.68855	13.6677	20.0975	7.56114	6.57446	4.53214
Os11G0104350	0	0	2.4511	0	0	0	36.2969	75.7882	16.0421	57.0372	53.7574	31.8425	13.8221	20.2531	43.3381	23.1695
Os11G0115350	Similar to Non-specific lipid-transfer protein 2.	0	0	0	0	-1.5688	2.41651	708.559	747.738	63.5521	92.2276	7.11153	597.402	706.353	89.8644	300.315
Os11G0115400	Lipid transfer protein LPT IV.	0	0	0	0	1.3314	14.1578	346.14	184.802	125.484	259.575	29.277	172.649	195.763	175.392	113.225
Os11G0116000	Similar to Nonspecific lipid-transfer protein 1 (LTP 1) (Major allergen Pru d 3)	0	1.3726	0	0	0	1867.42	1903.83	1821.93	2530.82	2371.12	2213.86	733.267	2762.44	5064.81	2309.56
Os11G0116200	Similar to nonspecific lipid-transfer protein 3.	-1.2085	1.1881	0	-1.2855	0	39.8571	199.178	121.042	43.7616	136.668	91.947	87.181	149.252	111.912	131.719
Os11G0116300	Chalcone isomerase domain containing protein.	-3.4051	0	1.2092	-1.0289	0	6.03295	315.895	189.462	135.037	432.1	63.7979	338.538	74.73	289.055	465.843
Os11G0140700	Similar to Saccharopine dehydrogenase family protein, expressed.	0	-1.4095	0	-1.2584	0	67.7146	32.925	12.4966	22.1508	32.9526	84.8068	87.2257	16.6795	55.5922	45.7673
Os11G0143300	A-type response regulator, Cytokinin signaling	0	0	-1.4696	0	0	33.4907	79.9292	65.4391	41.8706	18.1361	43.2484	48.4297	165.278	24.4241	25.5402
Os11G0151400	Cytochrome P450 family protein.	0	5.0428	-5.3441	0	0	0.209983	73.4173	0.966725	1.20732	0.186179	0	2.22119	35.8108	0.432271	0.423102
Os11G0180000	Plant disease resistance response protein family protein.	0	1.8461	0	0	0	0.133496	45.3661	14.0959	24.5773	3.12478	0.861124	12.5844	8.0287	8.58795	5.81009
Os11G0182100	Protein of unknown function DUF688 domain containing protein.	0	0	0	1.7244	0	2.4951	16.857	9.31381	52.0346	4.52019	2.54784	14.4763	9.68859	16.5199	9.40274
Os11G0186200	Similar to Aldehyde dehydrogenase	0	0	0	0	-1.285	116.417	150.178	108.518	172.098	30.7432	122.364	148.24	83.6332	113.597	82.2307
Os11G0208900	Leucine rich repeat containing protein kinase.	-1.122	0	0	0	0	10.0456	11.9291	32.4114	2.58778	35.0023	21.8249	10.4317	37.7881	6.12867	36.917
Os11G0209000	Glycine rich family protein.	0	1.297	0	0	0	721.715	802.946	716.508	787.752	533.805	1261.51	325.892	1193.08	823.037	1059.7
Os11G0209700	Hypothetical conserved gene.	0	-1.0637	0	0	-1.0923	26.6593	21.446	31.0598	13.9755	14.9212	24.0362	44.7062	16.8642	12.2035	34.9194
Os11G0210300	Alcohol dehydrogenase 1.	0	0	0	1.9465	0	14.7909	64.8549	23.7233	147.25	18.3741	22.7289	52.0114	20.4691	40.0769	27.7729
Os11G0210500	Similar to Alcohol dehydrogenase.	0	0	0	3.0302	0	0.052175	0.340976	0.232456	27.1825	0.0555126	0.432719	0.438277	0.130746	3.49075	0.336414
Os11G0210600	Similar to Alcohol dehydrogenase (Fragment).	0	0	0	-1.1574	-2.3939	106.07	100.341	178.548	29.8921	28.5226	197.629	108.754	108.632	69.9445	164.55
Os11G0213700	Leucine-rich repeat, typical subtype containing protein.	0	0	-1.9272	0	0	4.81327	14.8325	7.07037	6.87809	10.5466	5.11618	8.76253	24.5214	9.4181	12.5792
Os11G0214900	Plant disease resistance response protein family protein.	0	1.7169	0	0	0	0.458541	53.0411	10.3782	0.0645658	2.53694	2.11275	16.092	11.6439	8.21239	4.50878
Os11G0216100	Similar to Heat shock protein binding protein.	0	0	0	0	1.1091	7.9502	4.19333	239.912	4.75984	306.58	3.865	5.02478	227.567	6.05682	156.004
Os11G0256900	SAM dependent carboxyl methyltransferase family protein.	1.6212	-2.6763	0	0	0	73.8621	6.14339	59.7977	46.5384	36.2357	23.9684	39.1639	68.7395	45.0637	36.7147
Os11G0284300	Similar to POT family protein.	0	0	0	-1.205	0	29.7697	45.9861	23.7571	51.8868	22.6348	52.0021	17.6641	28.0401	125.483	33.1792
Os11G0292050	Similar to PHD-finger family protein, expressed.	0	-1.1307	0	0	0	33.0047	17.892	20.5506	12.3466	12.0544	31.5536	39.0714	13.9953	14.6484	16.7782
Os11G0416900	ABC transporter-like domain containing protein.	-4.8455	-3.5702	0	-2.9791	-3.6043	0.767339	1.29846	2.36056	1.42776	1.18576	22.0215	15.3811	7.81364	11.8097	15.8295
Os11G0455500	Similar to Adenosylhomocysteinase.	0	0	1.0071	1.5267	0	254.618	554.592	936.013	712.119	399.107	269.322	630.526	424.707	259.273	618.909
Os11G0470966	Hypothetical conserved gene.	-6.5989	-5.5127	0	0	0	0.069413	0	0.0206171	0.0488692	0.0246178	6.71631	8.05513	1.68145	3.33419	2.16321
Os11G0474800	Similar to Isoform 2 of Stemar-13-ene synthase.	0	0	0	0	-4.2157	0.0834667	0	4.46245	1.38094	0.577239	0	0.233711	0.592622	0.472518	11.7726
Os11G0474900	Similar to Stemar-13-ene synthase.	0	0	0	0	-4.9587	0.378495	0.309194	26.4189	6.83949	2.28201	0.232525	1.76634	4.637	4.80489	77.8913
Os11G0482901	Zinc finger, RING/FYVE/PHD-type domain containing protein.	0	3.7299	0	0	0	0.189613	13.7341	1.88669	4.31631	0.739721	0.203852	1.03235	5.27949	2.73236	1.04429
Os11G0489250	Similar to Cytochrome P450 family protein, expressed.	-1.4501	0	0	0	0	18.1415	2.51409	10.9693	23.0072	26.9712	49.4812	6.61421	14.7817	19.9652	33.3882
Os11G0508600	Sugar transporter, TAL effector-mediated susceptibility to bacterial pathogen	0	0	0	0	-3.7648	2.67711	2.97568	13.3743	12.73	3.68887	2.26478	2.00714	6.85527	3.97523	55.0387
Os11G0516000	Similar to Serine palmitoyltransferase (Fragment).	0	0	0	0	-1.3179	18.8492	23.9669	28.2669	31.5762	16.4025	17.3991	25.0395	21.9313	19.1398	44.8843
Os11G0518900	Conserved hypothetical protein.	-1.9814	-1.9673	0	0	-4.3718	3.5302	3.1071	4.58654	8.99551	0.436184	13.915	12.1168	3.67173	3.46955	9.91251
Os11G0530600	Similar to Chalcone synthase C2 (EC 2.3.1.74)	-5.5254	0	2.1156	-4.3129	0	1.41779	495.131	139.367	12.7661	246.558	65.1881	452.915	29.3268	266.175	230.826
Os11G0530700	Non-protein coding transcript.	0	0	0	-4.9649	0	0.389759	60.4953	20.6065	2.0123	55.0158	20.5923	81.8509	2.27898	65.9273	66.2828
Os11G0543500	Similar to H0502B11.6 protein	0	0	0	2.5618	0	26.6857	16.5938	11.0021	16.1518	7.79743	10.02	8.51302	3.79275	2.86976	3.94849
Os11G0544800	Glutamyl-tRNA(Gln) amidotransferase subunit B, Primary root development	0	0	0	-1.1155	0	58.8048	36.7509	17.1887	17.6223	7.88296	62.2162	61.8317	19.9881	40.0542	14.5521
Os11G0545300	TOPOISOMERASE 6 SUBUNIT A-LIKE PROTEIN	8.3219	8.827	6.2787	9.6696	7.8084	159.383	114.654	90.6884	97.984	68.6246	0.497185	0.251786	1.06523	0.126214	0.33602
Os11G0547800	Conserved hypothetical protein.	5.5376	5.453	0	0	0	24.9145	23.506	2.50146	15.7619	0.522699	0	0	0.117247	0.0722382	0
Os11G0549655	Similar to maf-like protein CV_0124.	5.1266	5.0309	0	0	0	17.8763	16.7363	5.54829	9.52167	9.33185	0	0	0	0.0689144	0
Os11G0549665	Hypothetical conserved gene	7.6677	7.2081	9.0792	6.9716	8.8592	77.029	56.0416	49.1153	46.3792	33.8057	0	0	0.0828092	0	0.0799015
Os11G0549675	Similar to cDNA clone:001-208-B08, full insert sequence	9.0026	6.2593	8.399	8.9305	8.9445	39.024	24.1364	12.7415	19.7281	14.907	0.0759474	0	0.0344213	0.0424155	0.0332127
Os11G0549680	Similar to Zinc knuckle family protein	9.4062	7.0285	7.7702	8.9928	9.3504	47.7625	25.3748	25.4134	25.4123	24.3677	0.070272	0	0.106164	0.0523278	0.0409743
Os11G0549900	Similar to tubulin alpha-6 chain.	0	0	0	0	1.115	2.6416	10.1357	82.6695	9.69339	231.575	4.35217	12.4771	55.6985	8.48658	117.357
Os11G0569300	Serine/threonine protein kinase domain containing protein.	-4.0924	0	0	0	0	0.468293	0.0997959	0.0181426	0.272357	0.194967	7.97407	1.46327	0.425183	2.3472	0.623585
Os11G0570000	Similar to Receptor kinase-like protein.	0	8.1702	0	0	0	0.570348	4.95979	2.18041	2.82377	0.450231	0.0339085	0.017172	0.276628	0.0378748	0.0444858
Os11G0572700	Carotenoid isomerase, Carotenoid biosynthesis, Root and coleoptile growth	0	-1.2549	0	0	0	86.6655	42.3866	31.2407	36.1672	30.4705	107.593	100.882	40.8748	58.6177	46.7306
Os11G0582000	Hypothetical conserved gene	0	0	0	0	-4.4757	0.0953124	4.2045	2.8876	5.43537	2.53524	4.12808	22.6847	11.5442	31.2956	61.9165
Os11G0582100	Zinc finger, RING/FYVE/PHD-type domain containing protein.	0	0	-1.6917	-1.0927	-1.075	22.1235	32.81	37.5746	112.95	31.5166	46.7945	58.5515	110.693	252.705	72.8797
Os11G0582700	Cyclin-like F-box domain containing protein.	-8.2855	-5.208	0	0	0	0.019552	0	0.0174221	0	0	6.08988	5.51114	1.69852	3.8841	2.71045
Os11G0584100	Cyclin-like F-box domain containing protein.	-8.4545	-8.3203	0	-4.9631	0	0.0389992	0.0318586	0	0	0	13.6565	10.1556	4.6584	9.51363	3.3004
Os11G0588400	Similar to NB-ARC domain containing protein, expressed.	-6.3331	-4.6647	-4.7512	-4.5075	-5.3364	0.270826	0.884954	0.670341	1.12284	0.352183	21.7957	22.3846	16.4639	26.792	15.6191
Os11G0588600	NB-ARC domain containing protein.	11.833	8.0681	8.3611	10.902	10.495	55.4362	33.7864	24.794	30.9149	17.4477	0.0151723	0	0.0687648	0.016947	0.01327
Os11G0592000	Similar to Barwin.	0	-4.3116	0	0	0	0.705029	1.51185	17.2762	19.048	5.62597	5.03512	29.9407	3.45988	6.34977	14.8452
Os11G0592100	Similar to Barwin.	0	0	2.2373	0	0	0.538188	1.53877	37.9652	12.5038	7.1577	0.165316	16.4928	7.34268	11.6331	6.14503
Os11G0592200	Similar to Chitin-binding allergen Bra r 2 (Fragments).	0	-7.0541	0	0	0	0.199938	0.16333	0.267236	0.140763	0	5.98796	21.6469	0.91855	6.07099	11.9247
Os11G0592800	Similar to CDK5RAP1-like protein.	0	-1.6886	0	0	0	28.8353	14.2476	8.12248	6.39624	8.98737	39.6481	45.801	10.9645	13.5735	13.7631
Os11G0592900	Thioredoxin domain 2 containing protein.	0	-5.4504	0	0	0	0.155533	0.381168	0	0.438004	0.661932	14.1176	16.6216	7.53525	14.3281	10.1538
Os11G0596250	Conserved hypothetical protein.	8.8112	7.7671	8.549	10.002	9.0229	109.78	73.4955	60.5483	44.3914	33.7074	0.243963	0	0.147427	0.0454166	0.0711253
Os11G0598500	NB-ARC domain containing protein.	-7.1158	-9.0985	-6.869	-7.1697	-8.8786	0.0676267	0.0276223	0.105455	0	0.0359764	9.36341	15.1013	11.2413	19.0379	18.5864
Os11G0600600	Hypothetical conserved gene.	0	0	0	4.0075	0	1.36912	0.534906	4.87989	27.2409	9.69023	0.109709	0.0555594	0.248616	1.77686	1.10348
Os11G0604700	Thioredoxin domain 2 containing protein.	0	0	0	-2.5393	0	4.16344	4.89557	3.87853	4.92977	3.95995	16.9743	15.3083	11.2763	30.063	14.4394
Os11G0604900	Similar to NB-ARC domain containing protein.	-8.9462	-9.3779	-7.1587	-9.8582	0	0.0657426	0.0716072	0.0390539	0.0154284	0	32.3713	47.5137	5.0888	15.0225	2.56103
Os11G0605100	NB-ARC domain containing protein.	-8.1517	-12.63	-7.9536	-10.863	0	0.361345	0.015536	0.101679	0.026779	0	102.577	98.1963	22.987	52.3056	3.74008
Os11G0607900	Hypothetical conserved gene	0	0	0	0	-7.0463	0	0	0.0211018	0.0166727	0	0.0218229	0	0.949506	2.85193	25.0419
Os11G0608000	Nucleotide-binding, alpha-beta plait domain containing protein.	-7.692	0	0	0	0	0.0430504	0	0.0383606	0.0151545	0	8.8864	7.69466	2.91278	6.51384	4.2331
Os11G0611600	Hypothetical protein.	1.9971	2.2068	0	0	0	49.2955	34.6036	16.3341	25.7532	18.6251	12.3268	7.47564	5.17297	11.0489	5.85649
Os11G0615800	DNA repair protein RAD51, Homologous pairing	-7.7207	-6.4185	-8.3774	-7.1931	-6.2163	0.0946237	0.231896	0.0843158	0.166546	0	19.9245	19.783	25.5694	25.5665	28.1416
Os11G0615900	Conserved hypothetical protein.	-2.5001	-4.936	0	0	0	2.24897	0.588844	0.205536	0.0405988	0.276096	12.7004	17.9767	2.23984	2.84907	4.46182
Os11G0628000	Protein kinase, catalytic domain domain containing protein.	-5.1502	-5.4734	-6.0786	-6.5399	-5.9603	0	0	0	0	0	5.29395	6.62037	9.63006	14.2198	9.73289
Os11G0630300	Conserved hypothetical protein.	0	5.2468	0	4.2836	0	4.52261	4.65834	3.01759	8.76776	4.99789	0.523472	0.122353	0.730003	0.47226	0.316967
Os11G0633500	Similar to NBS-LRR disease resistance protein	0	-1.1003	0	0	0	18.582	8.48455	4.69202	5.11655	4.47581	19.6099	18.1423	6.1796	9.34677	7.04991
Os11G0635500	Cytochrome P450 family protein.	0	7.0277	1.8464	0	4.4953	10.5082	259.148	34.16	13.3986	96.3629	3.2173	1.98074	8.66322	3.73456	4.68988
Os11G0644600	Conserved hypothetical protein.	0	0	1.1193	0	0	16.5936	27.3241	75.4584	13.4152	181.669	11.1334	15.0004	31.6773	7.02385	115.017
Os11G0648000	Similar to Na+/H+ antiporter.	2.4314	1.9814	0	3.0001	0	98.996	55.4445	10.7116	47.0622	21.4822	18.3196	14.0032	3.5028	6.17071	9.11294
Os11G0655000	Conserved hypothetical protein.	-8.5885	-8.8436	0	-8.755	-7.9447	0.0279112	0.0228008	0.0248706	0.0196505	0.0296966	10.7254	10.4464	6.41145	8.90599	8.03097
Os11G0659500	Similar to Acyl-ACP thioesterase (Fragment).	0	0	0	-1.423	0	17.7171	14.3828	8.45268	10.9403	10.1321	31.9728	24.012	13.196	30.7737	14.5771
Os11G0661800	Concanavalin A-like lectin/glucanase domain containing protein.	0	0	0	5.5291	0	5.11096	3.99364	7.22731	12.7505	6.1078	0	0	0	0	0
Os11G0661900	Conserved hypothetical protein.	0	0	0	8.4489	0	4.21316	6.34573	6.02236	15.0474	4.80954	0.0404425	0	0	0.0451731	0
Os11G0664500	Hypothetical conserved gene.	5.0883	4.7791	0	0	0	7.37638	5.95627	2.67969	4.35433	2.5054	0	0	0	0	0.0228661
Os11G0667700	Similar to Protein kinase domain containing protein, expressed.	0	0	0	-2.8921	0	0.900682	1.91301	2.00641	12.8091	2.58741	4.97994	3.02634	17.3792	99.7531	12.2682
Os11G0668650	Calmodulin binding protein-like family protein.	0	0	0	-3.4358	0	0.0408227	0	0.472883	0.977181	0.0434341	0	0.114305	2.48926	11.093	3.05989
Os11G0669100	Calmodulin binding protein-like family protein.	0	5.7982	0	3.0548	0	5.10343	6.00621	10.8934	14.575	6.96376	0.212559	0.107645	4.21476	1.84002	1.83585
Os11G0670900	Conserved hypothetical protein.	0	4.0602	0	0	3.5583	0.753505	21.1746	9.33276	3.97871	35.1949	0.277746	1.26591	0.629407	0.155117	3.27946
Os11G0671000	Similar to Dormancy-associated protein.	0	1.6068	0	1.0218	0	249.166	183.845	59.0749	367.073	3.74	150.21	60.1997	45.204	189.658	1.77893
Os11G0672300	Similar to Protein kinase domain containing protein,	2.4468	3.0674	2.294	2.8491	2.5844	54.4172	81.4496	70.2774	138.955	86.0855	9.96323	9.69023	13.0683	20.2305	15.7546
Os11G0676200	Similar to NBS-LRR-like protein NBA2	-4.692	-4.0416	-6.3994	-4.8984	-8.0329	0.419252	0.747249	0.577352	0.402503	0.081104	10.8177	12.2729	44.4441	12.593	23.3156
Os11G0679700	Glycerol-3-phosphate acyltransferase, Anther development, Pollen formation	0	-2.5629	0	0	0	0	2.08262	1.16573	2.76316	0.49967	0.340032	12.2732	0.756546	2.17525	2.00069
Os11G0684000	Similar to Transcription factor MYB21	0	0	0	2.6729	-1.8764	2.70886	14.3455	20.0176	49.3881	6.21151	1.67851	15.5622	12.523	8.12433	25.0323
Os11G0684700	Similar to NB-ARC domain containing protein, expressed.	0	0	0	6.121	0	0.0202035	0	0	10.4831	0.0214959	0	0	0	0	0
Os11G0687100	von Willebrand factor, type A domain containing protein.	0	0	0	-2.789	-1.1038	1.17127	0.113907	2.48495	6.28279	21.304	0.334081	0.182201	4.91514	45.5541	50.2576
Os11G0691280	EGF-type aspartate/asparagine hydroxylation site domain containing protein.	0	0	0	-10.427	0	29.0396	4.23435	6.98377	0.0219838	2.99006	33.5799	14.6887	4.2254	31.7546	12.3318
Os11G0695000	Similar to Leucine Rich Repeat family protein.	0	0	0	-5.5032	1.1563	73.8962	22.0459	30.7558	0.298997	48.8417	67.527	27.9631	25.5418	14.2268	24.0537
Os11G0704000	SelT/selW/selH selenoprotein family protein.	0	0	0	-4.8613	0	4.78354	7.68727	9.22364	0.772934	5.67359	6.576	6.51409	4.58525	23.5692	10.3022
Os12G0101800	Similar to Nonphototrophic hypocotyl 1a.	0	-1.8594	0	0	0	42.7021	8.37497	24.3276	12.6783	5.21682	31.4024	30.308	19.0634	16.104	6.70015
Os12G0102600	Similar to HCF152.	0	-1.055	1.1123	0	0	40.5695	28.7028	40.9419	14.085	106.548	57.4901	59.4769	17.2698	25.1525	76.4002
Os12G0104300	Clp, N-terminal domain containing protein.	0	1.0389	0	0	0	27.3308	54.1823	15.0724	21.6862	26.9844	29.9263	26.2995	10.4864	13.7934	28.5118
Os12G0104800	Similar to Clathrin heavy chain.	0	1.1878	0	0	0	167.623	203.429	133.178	319.621	235.966	177.301	89.0567	179.165	314.718	137.359
Os12G0113500	Similar to CBL-interacting protein kinase 14.	0	0	1.0979	0	0	7.2867	8.33904	48.652	1.67851	9.82502	6.77667	8.21139	20.7282	2.10836	4.8986
Os12G0115100	Nonspecific lipid-transfer protein 1	0	0	0	0	1.4246	15.7379	218.226	103.905	75.2641	161.374	23.2193	116.903	102.648	144.029	65.9851
Os12G0115300	Plant lipid transfer protein and hydrophobic protein, helical domain containing protein.	0	1.0024	0	0	0	396.102	365.279	234.617	405.55	225.013	568.104	181.841	368.89	830.35	291.221
Os12G0115500	Similar to nonspecific lipid-transfer protein 3.	0	1.1768	0	-1.4066	0	794.734	2736.91	1184.95	924.17	913.021	1569.77	1207.32	1390.19	2570.19	954.554
Os12G0115700	Chalcone isomerase domain containing protein.	0	0	0	-3.5215	0	0.460763	36.0925	8.57634	1.80219	29.4688	5.47261	45.2511	2.43756	21.7108	25.7066
Os12G0123500	Similar to Apyrase precursor (EC 3.6.1.5) (ATP-diphosphatase) (Adenosine diphosphatase) (ADPase) (ATP-diphosphohydrolase)	0	1.566	0	0	0	23.4405	61.1186	31.0907	41.1761	7.68641	16.9618	20.587	57.9374	24.6415	20.3171
Os12G0123700	NAC domain containing transcription factor, Abiotic and biotic stress response	0	0	0	0	1.2646	1.60391	3.63592	14.3276	3.52878	49.6595	1.18242	6.43713	11.1535	2.10491	22.6871
Os12G0125500	Similar to MatE family protein, expressed.	0	0	0	-1.5363	0	9.77168	35.1536	9.96767	8.71418	14.6347	13.5157	30.4013	6.20338	26.5148	18.5717
Os12G0139400	A-type response regulator, Cytokinin signaling	0	0	-1.2674	0	0	31.8245	65.2815	83.5045	53.9816	30.2645	44.509	43.8979	183.318	35.8733	37.9639
Os12G0145700	Pyruvate kinase family protein.	0	0	0	0	-1.1314	21.7266	47.2024	29.0396	43.0266	17.9046	27.6674	51.3804	23.6318	24.7641	43.0525
Os12G0147800	Similar to Phytosulfokines 5 precursor (Secretory protein SH27A).	0	1.3394	0	1.7853	0	9.24966	187.054	75.0085	259.265	27.6124	7.11328	73.7234	83.0994	78.9053	51.9168
Os12G0150200	Cytochrome P450 enzyme, Salt tolerance	0	4.2347	0	0	0	0.184762	33.2052	1.84391	4.47472	0.786324	0.0681041	1.75896	11.4206	1.93979	0.863698
Os12G0159000	Harpin-induced 1 domain containing protein.	0	1.4339	-1.241	0	0	35.2752	66.3379	48.131	123.192	24.552	47.0667	24.4873	103.743	153.859	34.1171
Os12G0171500	Conserved hypothetical protein.	0	-2.1437	0	0	0	23.9091	6.18331	10.9199	4.44082	3.96278	23.1396	27.2496	8.83157	7.72916	3.72814
Os12G0175400	Similar to OSMYB2.	0	0	0	0	-1.3857	0.0637581	1.09377	12.2715	28.5937	17.7732	0.117508	0.83312	8.62772	30.385	50.9764
Os12G0189300	Pyruvate/Phosphoenolpyruvate kinase, catalytic core domain containing protein.	0	3.3888	0	0	0	2.14121	23.0213	827.745	2.28555	622.017	1.273	2.1919	1001.02	5.47433	624.615
Os12G0191200	Hypothetical conserved gene.	0	-1.7137	0	0	0	78.9257	34.3321	36.8915	18.1846	31.4073	61.2623	112.307	20.6871	21.4361	53.279
Os12G0199000	Similar to Jasmonate-induced protein	0	0	0	0	2.3393	8.82933	12.4991	2.93199	4.3629	54.6143	19.8607	5.27209	10.536	4.57224	11.8456
Os12G0199500	Similar to N-methyltransferase.	0	0	0	0	-1.9265	23.7512	38.2701	25.036	40.4842	7.85352	35.8201	28.6131	15.1158	32.0448	32.7684
Os12G0207600	Similar to ribulose-1,5-bisphosphate carboxylase/oxygenase large subunit.	0	0	0	-2.3673	0	3.69864	7.16192	6.22526	4.21136	5.73282	9.21514	4.90116	8.20051	22.7951	2.94421
Os12G0218300	Conserved hypothetical protein.	0	0	0	1.2851	0	10.0586	40.1179	30.1398	413.581	21.9287	18.5383	13.6221	44.646	178.037	37.1173
Os12G0224000	Similar to Diacylglycerol kinase 1	0	0	-1.8198	0	0	3.33229	22.5259	8.20266	14.6042	8.64206	4.22228	8.55303	26.4083	10.7614	9.23226
Os12G0231000	TGF-beta receptor, type I/II extracellular region family protein.	0	1.6052	0	0	0	18.3802	62.1476	59.754	32.7552	26.3701	25.2212	20.3718	80.1721	16.6426	33.2158
Os12G0234800	Hypothetical conserved gene.	1.8335	0	0	0	0	111.889	6.3036	11.0014	14.4353	16.1856	31.3383	24.3844	7.27432	13.3889	14.0378
Os12G0274700	imilar to Petunia ribulose 1,5-bisphosphate carboxylase small subunit mRNA (clone pSSU 51),	-1.3232	1.2874	0	0	0	57.6741	227.837	287.997	124.256	207.39	144.057	93.0895	414.14	132.416	184.712
Os12G0291100	Similar to Petunia ribulose 1,5-bisphosphate carboxylase small subunit mRNA (clone pSSU 51), partial cds	0	1.1538	0	0	0	1666.41	2495.05	2263.56	2045.04	2159.72	1927.6	1118.34	3616.48	2198.04	1498.03
Os12G0291400	Similar to Petunia ribulose 1,5-bisphosphate carboxylase	0	1.4116	0	0	0	30.6914	65.1757	27.2242	45.7089	14.7759	44.0234	24.4332	41.2391	44.3842	12.1444
Os12G0406000	Conserved hypothetical protein.	0	-1.1987	0	0	0	73.8576	26.8084	11.2152	11.9871	12.118	48.0658	61.3675	5.4502	14.4255	8.02826
Os12G0428000	Similar to senescence-associated protein DIN1	0	0	-2.5215	0	0	3.38288	3.59632	5.78097	5.97048	0.493052	3.84333	0.648782	30.2703	14.0711	0.224097
Os12G0434400	Similar to predicted protein.	0	0	0	1.3816	-2.0661	0.724866	0.0986911	8.10966	40.7698	6.34127	0.890631	0.30069	2.79196	16.4143	29.1463
Os12G0448900	Fatty acid alpha-dioxygenase family, Enzyme that oxygenates fatty acids into 2R-hydroperoxides	0	0	0	1.0975	0	4.53589	27.8854	203.047	161.718	100.233	4.23346	16.3101	220.749	79.2798	136.531
Os12G0484600	Nodule-specific protein-like.	0	0	0	0	-1.1795	36.187	64.9591	50.7389	58.5744	17.7877	37.7908	91.923	28.7054	57.1764	44.2238
Os12G0489100	Similar to Ubiquitin-specific protease 12.	0	-1.2275	0	0	-1.5593	20.2437	15.2539	16.4796	8.37039	10.2565	18.7535	35.6228	9.39426	8.81984	33.1786
Os12G0510750	Conserved hypothetical protein.	0	0	-4.8123	0	0	0.522166	21.2427	1.95419	3.82328	4.33343	0.481182	2.1444	50.0721	6.12712	2.77763
Os12G0514500	Similar to Heat-shock protein precursor.	0	0	0	0	-1.15	29.2134	21.7004	11.8352	10.3593	27.0446	24.4792	43.9402	7.50605	7.9227	65.8749
Os12G0516000	Conserved hypothetical protein.	0	-4.688	0	0	2.9453	106.828	1.38338	38.9815	5.26573	498.038	60.2102	35.5628	4.71513	33.6991	70.9732
Os12G0516200	Conserved hypothetical protein.	1.3324	0	2.3627	0	1.2952	835.6	7.96668	83.8645	42.0676	362.341	331.229	49.5569	14.8699	78.8703	162.068
Os12G0516300	NB-ARC domain containing protein.	0	-1.1589	0	0	0	44.827	25.3183	25.0056	13.469	11.7213	42.7107	56.3818	14.6388	18.3866	16.0323
Os12G0541500	Similar to Elongation factor Ts.	0	-1.1073	0	0	0	462.423	178.445	97.3221	73.5707	156.989	338.987	383.401	59.0503	85.6231	124.947
Os12G0555000	Similar to Probenazole-inducible protein PBZ1.	0	0	0	1.4599	0	40.494	19.0736	1029.2	3411.09	1042.46	36.9187	51.3851	487.654	1300.79	2181.41
Os12G0555200	Similar to Probenazole-inducible protein PBZ1.	0	0	1.2742	1.3945	-1.1979	21.6911	14.6668	242.797	851.648	253.347	34.8865	6.67264	91.5437	339.834	637.948
Os12G0555500	Probenazole-inducible protein PBZ1.	0	0	1.1883	0	-1.8956	118.395	181.921	456.079	1768.87	850.416	224.81	147.789	182.52	931.555	3473.15
Os12G0556200	Calmodulin binding protein-like family protein.	1.5728	0	0	0	0	60.91	23.4448	108.599	295.903	41.9196	20.4386	12.5351	176.888	174.662	83.7662
Os12G0567300	Myb transcription factor domain containing protein.	0	0	0	2.2641	0	6.45811	10.3678	22.7181	28.5851	55.6868	5.07148	7.33803	35.3691	6.24272	48.973
Os12G0570700	Similar to Metallothionein-like protein type 1.	0	0	0	0	-1.7289	3.60138	15.1557	47.1634	24.3562	22.41	2.71531	21.6959	25.9804	9.88508	81.5373
Os12G0575000	Protein of unknown function DUF1118 family protein.	0	0	0	0	1.0049	354.021	317.549	451.208	286.405	551.37	355.731	225.143	589.182	291.452	301.58
Os12G0583300	Peptidase aspartic, catalytic domain containing protein.	-1.8763	0	0	-1.3951	0	11.1847	12.2874	109.514	11.4948	74.2277	40.9903	19.7985	88.8444	31.7142	70.5278
Os12G0592900	Conserved hypothetical protein	0	0	0	2.446	0	0.460314	11.187	23.6872	339.633	9.67275	0.848369	4.72596	58.0599	65.3846	9.92429
Os12G0611300	Similar to Patatin-like phospholipase family protein, expressed.	0	0	1.5136	-2.2806	0	11.3515	27.1033	26.8491	9.6666	35.8776	22.1132	26.7599	8.57558	49.2708	46.485
Os12G0623600	Protein of unknown function DUF1637 family protein.	0	0	0	2.1157	0	12.6864	12.8363	9.63848	166.192	3.50473	17.8847	10.636	10.4111	40.2282	5.23803
Os12G0629300	Similar to Thaumatin-like protein.	0	0	0	0	-2.0136	21.7018	0.203774	113.359	520.447	27.6019	7.12589	0.698461	162.836	362.025	122.337
Os12G0629600	Thaumatin-like protein.	0	0	0	1.0143	0	17.2896	4.40746	288.782	806.836	1069.03	10.7347	15.6794	134.485	419.03	723.135
Os12G0630100	Thaumatin protein, Tolerance to nitrogen deficiency	0	0	0	2.8431	-3.0726	1.32473	14.1456	5.81779	82.6069	6.34263	4.44704	23.9339	3.08255	12.0771	58.571
Os12G0637200	Similar to Purple acid phosphatase.	0	0	1.3371	0	0	10.6782	19.7092	55.2497	7.65969	4.23369	11.4646	10.8597	19.9428	12.5464	2.31398
Os12G0637300	Conserved hypothetical protein.	0	0	5.8594	0	0	0	0	14.152	0	0	0	0	0	0	0
Os12G0638200	Similar to Peptide transporter.	0	0	0	-1.3217	0	19.7113	36.0121	114.191	20.8755	93.8072	45.5398	24.0583	61.8256	54.7394	78.0761
EPlOsAG00000018126		5.328	0	0	0	0	346.59	223.185	211.255	123.993	171.768	0	0	0	0	0
EPlOsAG00000023827		9.1377	5.3433	8.2457	5.9331	8.9945	756.653	451.698	404.536	662.815	544.961	1.34089	0	1.21546	0	1.17278
EPlOsAG00000025431		2.8231	0	0	0	0	261.544	2.44528	34.6745	0.526857	31.8484	36.8937	12.9215	32.8173	0.770266	52.4734
EPlOsAG00000046354		0	0	0	-1.2691	0	445.601	222.993	93.9606	508.896	174.623	372.229	79.3705	169.059	1286.69	47.2918
Novel00040		0	-1.5606	0	0	0	17.3905	7.23314	6.70867	4.66599	4.20266	12.4101	21.279	4.11877	5.43006	8.80295
Novel00140		0	-5.608	0	0	0	0.698242	0.443642	0.207393	0.928554	0.495272	0.786425	21.5786	0.712856	1.03812	0.375177
Novel00225		0	0	0	-3.6022	0	7.35726	6.16043	4.09737	12.6904	5.47953	10.3392	5.32184	5.68464	161.68	1.63069
Novel00266		1.0364	-4.5449	0	-2.2771	0	125.082	1.08198	1.69655	9.26662	9.248	60.8742	25.1878	0.76062	47.1191	2.80221
Novel00282		0	-1.4741	-1.6966	-1.4466	0	10.0021	7.0286	5.20694	13.1372	2.97516	13.5778	19.4739	15.392	37.5644	7.58468
Novel00348		0	0	-6.8298	0	0	0	0.0482332	0.157835	0	0	3.4278	4.84955	16.3741	5.46965	11.3259
Novel00351		0	0	0	6.1916	0	0	0	0	12.3636	0.0241401	0.0418158	0	0.018952	0	0
Novel00362		0	0	0	-1.6237	0	39.637	154.053	42.7874	57.041	111.283	61.4666	91.7544	41.7144	184.402	85.0028
Novel00408		-8.3725	0	-5.8077	-11.801	-7.9488	0.0670897	0	0	0.0472336	0.0713815	22.1948	6.82538	27.4038	176.851	19.358
Novel00502		1.719	0	0	0	0	67.1381	10.568	9.69486	39.7011	19.4817	20.3579	8.97844	9.25446	38.7864	9.4642
Novel00503		1.8932	0	0	0	0	175.805	11.9537	19.4176	36.6132	29.7938	47.2439	30.7542	16.6197	36.1914	20.6179
Novel00513		0	-1.9645	0	0	-2.4709	3.85567	3.72239	5.2204	1.06936	1.5983	4.69125	14.4882	1.47788	1.1339	9.7263
Novel00701		-5.2126	-4.8461	0	0	0	0	0	0	0	0	19.9832	15.4931	5.01523	6.61623	7.05943
Novel00809		0	0	4.2579	-4.3719	0	0.688052	13.802	12.0576	0.565149	30.1367	7.81992	20.3361	0.574734	12.2757	28.8676
Novel00814		0	-1.4183	0	0	-1.5656	10.982	8.99527	12.4616	3.44092	4.60487	9.67234	23.9762	4.94325	2.68199	14.9616
Novel00839		5.2557	0	0	0	0	15.5321	10.0811	3.79181	5.84208	5.09354	0	0	0.0888635	0	0
Novel00906		0	0	0	-5.8425	0	50.2508	30.2229	26.5922	0	29.8845	48.167	36.5381	31.8202	19.6955	33.9571
Novel00948		0	0	0	2.569	0	84.3787	21.3503	6.69858	103.082	7.69939	41.3706	3.08199	8.62686	18.2236	7.30469
Novel00964		0	5.0167	0	0	5.5503	2.81816	5.28453	3.50041	3.66756	7.29166	0	0	0.0178335	0	0
Novel01025		0	0	0	0	-1.6518	1.38686	0	32.3068	223.386	41.7377	0.273859	0.277377	31.1127	229.725	143.953
Novel01104		0	-1.8807	0	0	-2.2836	8.59191	6.53092	4.70343	1.45122	1.8652	7.15419	23.9858	1.56089	1.3087	9.96808
Novel01146		0	0	0	0	-1.4116	19.3024	20.3774	80.0445	18.6072	39.1785	19.4293	54.1861	51.5948	13.7547	114.406
Novel01192		0	0	0	1.615	0	3.34468	0.555342	110.127	117.279	60.1786	3.3578	2.08117	72.208	40.1647	75.8092
Novel01325		0	0	0	7.5155	0	0	0	0	158.858	0.313821	0	0	0	0.910787	0
Novel01440		0	0	0	0	-2.3731	8.9874	13.2663	26.6223	7.30466	5.39034	12.343	13.2141	14.3768	6.50052	30.6525
Novel01503		-8.5954	-8.1961	0	-5.8945	0	0.135288	0.110518	0	0	0	52.2367	32.3254	24.1835	62.9422	4.79772
Novel01607		0	1.0745	0	0	0	18.7262	48.3801	82.5084	109.365	43.595	32.0695	22.911	98.6284	104.328	70.7562
Novel01608		0	-1.414	0	0	0	16.057	9.94732	8.61973	11.1914	8.80842	19.6575	26.4355	12.0981	12.3312	11.5148

## Sheet: S3
Table S3. Differentially expressed transcription factors in CBB23 and JG30 before and after the inoculation of PXO99A.
			log2FC					FPKM based expression pattern
Gene ID	short name	TF	C0 vs J0	CBB23-12 hpi vs. JG30-12 hpi	CBB23-24 hpi vs. JG30-24 hpi	CBB23-36 hpi vs. JG30-36 hpi	CBB23-48 hpi vs. JG30-48 hpi	C0	CBB23-12 hpi	CBB23-24 hpi	CBB23-36 hpi	CBB23-48 hpi	J0	JG30-12 hpi	JG30-24 hpi	JG30-36 hpi	JG30-48 hpi
Os02G0654700	OsERF91	AP2-ERF	-	3.1652	-	-	-	2.82283	55.0142	22.054	70.8002	3.05704	4.27352	6.11624	24.5056	75.6479	8.77551
Os02G0764700	OsERF103	AP2-ERF	-	2.8933	-6.5656	-	-	0.43126	21.4902	0.448327	1.06268	0.152949	1.72211	2.8847	38.7251	1.03576	0.173792
Os04G0610400	OsERF77	AP2-ERF	-	1.704	-1.418	-	-	5.55024	189.781	65.4117	70.5688	71.4258	8.21991	58.0935	159.395	49.7156	75.621
Os02G0655200	OsERF95	AP2-ERF	-	1.5519	-	-	-	3.29936	84.728	12.589	12.1504	31.4137	5.30121	28.8205	15.9705	13.6712	31.4331
Os04G0546800	OsERF093	AP2-ERF	-	1.4198	-	-	-	22.3109	92.1421	51.3008	102.04	7.50344	19.7327	34.3474	59.0511	62.295	6.95858
Os04G0669200	OsERF76	AP2-ERF	-	1.3396	-1.2869	-	-	29.9882	138.841	70.3569	78.3868	103.781	29.4719	54.7135	156.558	83.7348	75.2091
Os05G0497300	OsERF74	AP2-ERF	-	1.1473	-1.2249	-	-	40.438	238.187	139.968	191.528	110.845	45.2138	107.245	298.348	154.221	112.986
Os09G0457900	OsERF102	AP2-ERF	-	-	-6.4104	-	-	0	10.844	0.212169	0.251454	0.12667	0	0.388916	16.4584	0	0.671681
Os09G0522100	OsERF133	AP2-ERF	-	-	-6.9705	-	-	0	8.08495	0.236221	0.870985	0.0940193	0	0.494861	27.0156	0.636691	0.0712212
Os09G0434500	OsERF72	AP2-ERF	-	-	-	1.2484	-	52.5555	166.152	183.422	204.21	79.5463	104.851	133.034	215.161	90.1731	138.085
Os07G0617000	OsERF65	AP2-ERF	-	-	-	1.0366	-	4.54911	8.74618	28.0882	64.9282	2.24894	4.36143	7.33384	19.0763	33.2025	6.40706
Os03G0183200	OsERF69	AP2-ERF	-	-	-	2.1125	-	16.96	33.5655	59.515	307.128	11.4409	23.9266	40.7163	87.7027	74.507	15.6422
Os09G0286600	OsERF73	AP2-ERF	-	-	-	1.6666	-	6.97236	25.1769	103.367	51.9336	22.3089	9.35832	13.9584	74.0668	17.1616	33.8802
Os09G0287000	OsERF63	AP2-ERF	-	-	-	1.47	-	128.002	44.7929	42.9561	66.8804	3.65019	118.555	59.183	23.8644	25.3276	7.24642
Os08G0474000	OsERF104	AP2-ERF	-	5.8733	-10.29	-	-	0.0785127	81.8393	0.0699599	0.276379	0	0	1.39232	79.879	0.161627	0.189838
Os02G0677300	OsERF25	AP2-ERF	-	4.721	-8.5724	-	-	0.102955	17.7881	0.13761	0.144968	0.0547707	0.0474373	0.672653	47.7726	0.158958	0.0829795
Os01G0821600	WRKY21	WRKY	-	4.018	-2.7779	-	-	0.861007	16.318	4.68	17.7914	1.0535	0.396714	1.00453	29.2716	6.64677	3.26157
Os06G0649000	OsWRKY28	WRKY	-	3.7187	-	-	-	1.76328	21.1393	6.11492	31.2366	1.16621	0.526989	1.60127	8.43919	16.6779	2.88073
Os09G0417600	OsWRKY76	WRKY	3.6029	3.2201	-	-	-	20.6961	16.092	87.6753	523.812	22.1262	1.70037	1.72221	351.418	418.814	63.3058
Os02G0181300	OsWRKY71	WRKY	-	2.2275	-2.0044	-	-	18.2024	398.884	121.265	349.706	60.5698	18.1246	84.9457	443.687	276.886	43.3227
Os05G0537100	OsWRKY7	WRKY	-	2.0245	-	-	-	11.6623	26.2108	23.4704	215.641	16.6453	6.18605	6.42481	30.3653	137.022	23.2008
Os09G0334500	OsWRKY74	WRKY	-	1.6912	-2.1867	-	-	9.90608	26.9328	23.0387	33.3632	20.1029	9.93922	8.31768	95.6532	33.7385	32.4603
Os05G0343400	OsWRKY53	WRKY	-	1.1473	-	-	-	57.4658	197.405	155.492	251.775	57.5536	60.4325	88.8837	257.105	261.929	100.84
Os04G0605100	OsWRKY68	WRKY	-	-	-1.011	-	-	24.5046	132.765	105.136	123.149	83.7119	35.3791	80.6122	193.232	91.2623	83.1633
Os09G0417800	OsWRKY62	WRKY	4.3209	-	-1.2799	-	-	20.3042	0.809101	49.6681	268.038	14.0507	1.01412	0.256787	109.989	402.124	30.1571
Os05G0322900	OsWRKY45	WRKY	2.1743	-	-1.4018	-1.6061	-	56.8893	39.5486	180.717	233.824	111.372	12.5818	14.3894	435.473	746.768	91.1067
Os07G0680400	OsWRKY47	WRKY	-	-	-	-	-1.0087	10.2128	3.67447	33.247	97.4952	18.1232	5.13028	4.78324	33.5687	64.1346	40.0269
Os04G0517100	OsMYB4	MYB	-	3.5824	-	-	-	0.535256	49.2055	26.0413	49.0393	5.50512	0.723425	4.09656	43.3987	30.8526	9.34706
Os01G0874300	R2R3-MYB	MYB	-	1.0748	-	-	-	9.63495	89.22	27.3941	41.2802	25.291	13.6101	42.2423	52.154	77.2503	25.238
Os01G0975300	OsMYB48	MYB	-	-	-1.144	1.3568	-	80.7549	69.5865	48.5039	359.342	29.2755	65.5214	97.3851	97.7537	147.19	46.2382
Os12G0175400	R2R3-MYB	MYB	-	-	-	-	-1.3857	0.0637581	1.09377	12.2715	28.5937	17.7732	0.117508	0.83312	8.62772	30.385	50.9764
Os11G0684000	OsMYB21	MYB	-	-	-	2.6729	-1.8764	2.70886	14.3455	20.0176	49.3881	6.21151	1.67851	15.5622	12.523	8.12433	25.0323
Os12G0567300	R2R3-MYB	MYB	-	-	-	2.2641	-	6.45811	10.3678	22.7181	28.5851	55.6868	5.07148	7.33803	35.3691	6.24272	48.973
Os03G0315400	OsMYB2	MYB	-	-	-2.4619	-	-	2.75326	37.6488	3.16444	13.3721	0.89155	2.6107	17.8765	15.8987	4.23036	1.06129
Os04G0493100	OsbHLH065	bHLB	-	-	-2.2231	-	-	78.1285	38.8419	17.7891	38.7326	53.724	52.7567	17.1161	75.742	23.6861	49.2129
Os04G0489600	OsbHLH111	bHLB	-	-	-	2.3807	-	1.32608	0.175667	4.18358	17.032	0.800785	0.198162	0.0334512	5.7779	3.43078	0.693267
Os04G0631600	OsbHLH068	bHLB	-	-	-	2.0178	-	1.37887	18.1599	4.67491	17.6397	2.0396	0.867759	5.49316	8.00627	4.56937	3.82191
Os10G0376900	OsbHLH045	bHLB	-	-	-	2.9692	-	1.07264	3.90326	4.17071	21.7284	0.570626	0.898589	3.27647	1.14034	2.91072	0.982408
Os02G0603600	OsbHLH110	bHLB	-	-	-	1.8748	-	4.69596	8.57746	9.30911	42.7196	3.53675	4.03565	4.77694	8.02142	12.2197	3.95493
Os01G0900800	OsbHLH109	bHLB	-	-	-	1.0107	-	48.2837	66.2416	59.9692	132.897	23.5549	48.5694	45.1384	66.9297	69.1923	25.4754
Os02G0726700	OsbHLH034	bHLB	-	-	-	-1.6109	-	0.499463	0.448815	2.62582	11.0063	11.0534	0.368209	0.326321	4.92301	35.2671	17.4709
Os01G0108600		bHLB	-	1.799	-	1.2596	-	47.4086	121.698	44.5302	101.546	29.0186	27.3433	34.8784	45.8436	44.492	21.4426
Os02G0673500		bHLB	-	-	-1.1188	-	-	7.13974	28.2621	41.673	47.635	37.9059	9.55994	31.4857	82.5336	35.4377	56.2894
Os04G0493100	OsbHLH065	bHLB	-	-	-2.2231	-	-	78.1285	38.8419	17.7891	38.7326	53.724	52.7567	17.1161	75.742	23.6861	49.2129
Os04G0631600	OsbHLH068	bHLB	-	-	-	2.0178	-	1.37887	18.1599	4.67491	17.6397	2.0396	0.867759	5.49316	8.00627	4.56937	3.82191
Os04G0301500	OsbHLH6	bHLB	-	4.0452	-6.1966	-	-	0.664508	90.8212	0.910953	0.5758	1.46842	0.094208	5.48654	60.9293	0.894434	0.576775
Os03G0741100	OsbHLH148	bHLB	-	2.9538	-2.4829	-	-	22.0113	171.659	26.4807	62.0652	31.1472	31.3708	22.0967	135.002	95.7044	17.5619
Os03G0181100	TIFY GENE 11B	Tify	-	4.1428	-3.2301	-	-	1.17849	450.548	22.5116	33.6545	11.1281	0.882365	25.4361	192.634	23.0473	12.9414
Os10G0392400	OsTIFY11d	Tify	-	2.4875	-1.8992	-	-	4.32279	303.113	37.0665	92.9483	13.4963	4.44062	53.9058	126.084	50.111	29.5288
Os03G0180900	TIFY11C	Tify	-	1.9785	-	-	-	0.707888	58.7433	25.8091	20.5581	7.09236	0.761048	14.8659	42.3767	30.056	26.435
Os03G0402800	OsTIFY10A	Tify	-	1.5819	-1.901	-	-	37.8645	231.359	99.0897	111.492	63.0009	37.6331	77.0757	337.489	64.5012	70.6662
Os09G0439200	OsTIFY10c	Tify	-	1.3786	-	-	-	3.0572	44.636	10.5995	12.8751	4.49473	3.1758	17.1206	17.0401	10.4702	5.95846
Os10G0391400	TIFY11E	Tify	-	5.8017	-4.3317	-	-	0.158355	86.8009	1.19938	3.28887	0.673938	0.0729628	1.5519	22.0237	3.58588	0.765779
Os03G0180800	TIFY11A	Tify	-	4.8014	-3.5633	-	-	0.0632653	29.717	1.80395	1.95981	0.471187	0	1.06287	19.4473	1.75822	1.68268
Os02G0766700	OsbZIP23	bZIP	-	-	-1.5035	-	-	26.3782	34.5771	13.6046	25.0812	54.7966	15.1263	18.6658	35.1764	28.8112	44.1669
Os04G0637000	OsbZIP37	bZIP	-	-	-	1.3848	-	13.3436	13.0852	6.84806	32.3849	11.8909	13.2302	12.6119	5.40841	13.0102	13.2958
Os02G0203000	OsbZIP18	bZIP	-	-	-	-1.0782	-	67.5258	86.9222	98.807	56.8704	271.416	108.199	84.7611	48.5097	125.971	293.953
Os09G0474000	OsbZIP73	bZIP	-	-	-	-	-2.4964	0.156463	3.13147	22.8646	11.8968	5.66003	0	3.65085	13.9843	3.54304	35.0572
Os03G0815100	SNAC1	NAC	-	1.7117	-1.9136	-	-	17.2688	228.193	70.2144	170.388	120.478	20.6267	69.4814	241.244	90.4377	97.55
Os01G0862800	ONAC059	NAC	-	-	-5.0526	-	-	0	5.91957	0.655053	2.88356	0.111737	0.193553	0.588118	19.8255	2.43217	0.634823
Os07G0683200	ONAC103	NAC	-	-	-	1.9058	-	3.05571	1.32916	1.34374	21.0104	3.29341	0.987385	0.333356	0.662976	5.88203	4.95765
Os03G0327800	ONAC058	NAC	-	-	-	1.8409	-	5.8792	5.01287	10.3793	34.8725	16.9284	3.14907	6.51622	6.69114	10.2119	14.9559
Os01G0816100	OsNAC4	NAC	-	-	-	1.1054	-	3.11564	13.018	14.1088	71.0558	3.64101	1.64735	4.38581	10.5381	34.6454	6.83357
Os03G0133000	ONAC22	NAC	-	-	-	-1.5912	-	5.92459	4.29271	11.5683	11.6429	15.896	11.4414	1.44253	30.941	36.8013	11.5847
Os12G0123700	ONAC131	NAC	-	-	-	-	1.2646	1.60391	3.63592	14.3276	3.52878	49.6595	1.18242	6.43713	11.1535	2.10491	22.6871
Os06G0716700	OsHsp90	HSP	-	-	-	-	-1.2014	131.708	58.6868	75.3226	60.6983	68.7062	166.941	93.1863	54.2267	73.3678	173.429
Os08G0490100	OsDof24	Dof	-	1.1641	-1.2416	-	-	8.51598	67.192	51.915	30.6358	43.7568	12.0106	29.9034	111.95	22.6621	45.3672
Os03G0764100	WZF1	C2H2	-	1.9905	-1.0471	-	-	6.84511	65.7145	51.1596	94.292	25.0106	8.06818	16.4922	96.4041	60.1887	26.9007
Os02G0823900	OsSTA83	C2H2	-	-	1.4952	-	-	2.08776	3.25595	43.1257	3.02879	31.1656	1.0494	1.53526	13.9513	3.51643	35.8972
Os05G0444200	C2H2	C2H2	-	-	-	1.3903	-	1.41779	75.4964	31.6501	61.992	24.6519	1.68471	38.5497	40.9515	24.8087	39.3933
Os07G0583600	CIGR2	GRAS	-	-	-1.2292	-	-	118.947	155.854	93.5763	66.0703	70.5275	122.448	92.0812	200.063	106.777	80.4913
Os09G0491756	OsC3H60	C3H	-	-	-	-	1.0745	176.258	80.7983	30.5907	85.748	533.753	138.271	76.2723	23.9565	139.244	278.188
Os05G0128200	OsC3H33	C3H	-	1.0784	-	-	-	100.658	292.628	300.886	188.745	333.126	94.903	138.199	461.671	174.657	328.086
Os05G0525900	OsC3H37	C3H	-	-	-	2.7279	-	5.19846	7.84986	4.95969	114.344	0.44695	7.64535	7.05742	5.13181	18.1062	0.126965
Os07G0619600	HB	HB	-	-1.5507	-	-	-	24.4971	8.81021	4.32451	3.60664	1.27042	19.0604	25.7403	1.38347	2.77522	4.00469

## Sheet: S4
Table S4. Detailed list of differentially expressed Kinase responsive genes in CBB23 and JG30 before and after the infection of PXO99A.
		log2FC					FPKM based expression pattern
Gene ID	Description	C0 vs J0	CBB23-12 hpi vs. J30-12 hpi	CBB23-24 hpi vs. JG30-24 hpi	CBB23-36 hpi vs. JG30-36 hpi	CBB23-48 hpi vs. JG30-48 hpi	C0	CBB-12 hpi	CBB23-24 hpi	CBB23-36 hpi	CBB23-48 hpi	J0	JG30-12 hpi	JG30-24 hpi	JG30-36 hpi	JG30-48 hpi
Os09G0409950	Hypothetical conserved gene	-	-	-	-1.0863	-	27.3344	31.6636	28.1943	51.1741	22.9111	27.8618	26.9892	35.0932	113.989	29.1148
Os02G0126400	Calcium-dependent protein kinase, Positive regulator of the salt and drought stress responses	-	1.3608	-1.6798	-	-	21.8695	65.7253	44.7716	49.8188	15.7979	24.0114	25.5223	130.806	52.314	21.1567
Os07G0150700	Serine/threonine protein kinase, Pollination and drought stress responses,	-	-	-	-	-1.1306	33.1726	44.3822	68.7137	132.644	37.1368	23.5171	46.0869	56.3152	84.1855	89.2513
Os07G0678300	Similar to CBL-interacting protein kinase 29.	-	1.349	-1.2009	-	-	17.5677	55.4786	39.1349	47.5456	27.3899	13.8761	21.7204	82.0432	43.4449	31.904
Os08G0307400	Similar to Phosphatidylinositol 3-kinase 1	-	-1.4744	1.6784	-	-	46.2519	18.6761	30.0198	23.326	19.864	43.3721	51.7552	8.55326	32.1469	31.6139
Os11G0209700	Hypothetical conserved gene.	-	-1.0637	-	-	-1.0923	26.6593	21.446	31.0598	13.9755	14.9212	24.0362	44.7062	16.8642	12.2035	34.9194
Os12G0113500	Similar to CBL-interacting protein kinase 14.	-	-	1.0979	-	-	7.2867	8.33904	48.652	1.67851	9.82502	6.77667	8.21139	20.7282	2.10836	4.8986
Os01G0769700	Receptor-like kinase, Control of reproductive growth and development, Repression of cell death	-	-	-3.0765	-	-	4.45059	10.1016	2.30346	2.02637	7.45737	3.48731	3.90521	17.7198	1.42642	6.91637
Os12G0224000	Similar to Diacylglycerol kinase 1	-	-	-1.8198	-	-	3.33229	22.5259	8.20266	14.6042	8.64206	4.22228	8.55303	26.4083	10.7614	9.23226
Os03G0772600	Similar to Lectin-like receptor kinase 7;2.	-	-	-	-	-2.0802	4.40639	1.91307	25.1233	31.7385	6.42588	3.15189	3.01981	20.025	19.601	29.8272
Os02G0154200	Protein kinase, core domain containing protein.	-	5.0023	-	-	-	1.85108	4.58229	2.63242	0	1.53183	0	0	0.0156184	0	0
Os02G0228300	Protein kinase, core domain containing protein.	-	-1.3528	-	-	-1.6195	21.2694	6.45279	29.863	13.9216	19.6913	24.3014	16.4364	17.6489	12.7662	66.4153
Os11G0628000	Protein kinase, catalytic domain domain containing protein.	-5.1502	-5.4734	-6.0786	-6.5399	-5.9603	0	0	0	0	0	5.29395	6.62037	9.63006	14.2198	9.73289
Os02G0787300	Mitogen-activated protein kinase kinase 4,	-	-	-1.6705	1.0687	-	31.9906	24.6814	15.7123	64.4762	7.71208	14.2903	15.352	45.6135	32.2464	9.04392
Os03G0285800	MAP Kinase.	-	1.7903	-1.6969	-	-	6.95438	46.7766	32.674	89.116	12.0598	6.24209	13.4875	96.6036	75.579	14.595
Os05G0566400	Similar to Blast and wounding induced mitogen-activated	-	1.7529	-1.4387	-	-	13.1624	38.3692	23.6794	9.46191	39.2713	14.07	11.354	58.5378	19.2241	35.7342
Os01G0699600	Serine/threonine protein kinase domain containing protein	-	4.0281	-	-	-	0.199026	31.9074	3.32522	8.40729	0.211758	0.137554	1.95049	10.8892	2.15101	0.601538
Os02G0791700	Similar to STE20/SPS1-related proline-alanine-rich protein kinase.	-2.3981	-2.0199	-	-2.8008	-	3.22401	4.92503	2.70043	2.08823	7.47794	16.9642	19.9204	7.54049	15.265	14.2656
Os12G0145700	Pyruvate kinase family protein.	-	-	-	-	-1.1314	21.7266	47.2024	29.0396	43.0266	17.9046	27.6674	51.3804	23.6318	24.7641	43.0525
Os02G0698000	Similar to Phosphoribulokinase, chloroplast precursor (EC 2.7.1.19) (Phosphopentokinase) (PRKase) (PRK).	-	-1.0889	-	-	-	220.494	168.373	546.254	36.5661	364.763	245.004	357.193	370.749	47.5727	562.763
Os01G0127700	Conserved hypothetical protein.	-	-	-1.5154	-	-	1.99277	8.0573	9.66762	19.4008	11.0938	4.13645	4.28352	25.204	23.3915	11.2104
Os01G0310500	Protein kinase, catalytic domain domain containing protein.	-	-1.1614	-	-	-	24.9951	8.81268	8.60725	8.89501	6.2756	21.2057	19.659	6.88335	10.6641	7.45463
Os02G0633066	Protein kinase, catalytic domain domain containing protein.	-	-	-1.5064	-	-	1.51837	1.33726	10.7391	11.8256	8.9862	4.43807	0.531437	27.8234	21.9289	9.56068
Os02G0777800	Protein kinase, catalytic domain domain containing protein.	-	-	-	-1.1235	-	11.9799	44.9162	23.5004	18.1001	7.13882	21.8343	23.3342	23.8611	41.3689	10.5122
Os03G0125600	Ser Thr specific protein kinase-like protein	-	-	-1.4352	-	-	50.5516	53.5183	26.9361	52.8119	16.7493	35.954	54.2438	66.4281	47.4931	22.0397
Os06G0142500	Similar to Wall-associated kinase 3.	-	-1.4041	-	-1.3949	-	138.083	11.3359	23.3589	17.0317	78.9453	236.792	29.9194	29.4423	46.9852	59.3201
Os06G0202900	Serine/threonine protein kinase domain containing protein.	-	1.9965	-	-	-	4.96798	26.6122	3.73737	6.50789	2.03632	5.96648	6.65123	8.63971	4.06569	2.36306
Os06G0663200	Similar to Protein kinase APK1B, chloroplast precursor (EC 2.7.1.-)	-	-	-1.1911	-	-	11.5501	22.7016	18.4171	15.0202	13.213	10.03	15.5625	38.3497	12.7228	17.405
Os08G0374600	receptor protein kinase CRINKLY4	-	4.5539	-	-	-	0.22272	26.9272	0.396915	0.784013	0.118483	0.102619	1.14331	9.58101	1.03161	0.448767
Os09G0442100	Protein kinase, core domain containing protein.	-	2.8381	-	-	-	2.03583	12.8813	5.83795	7.45313	3.42631	2.62645	1.79649	8.1935	6.51504	9.30796
Os11G0570000	Similar to Receptor kinase-like protein.	-	8.1702	-	-	-	0.570348	4.95979	2.18041	2.82377	0.450231	0.0339085	0.017172	0.276628	0.0378748	0.0444858
Os11G0667700	Similar to Protein kinase domain containing protein, expressed.	-	-	-	-2.8921	-	0.900682	1.91301	2.00641	12.8091	2.58741	4.97994	3.02634	17.3792	99.7531	12.2682
Os11G0691280	EGF-type aspartate/asparagine hydroxylation site domain containing protein.	-	-	-	-10.427	-	29.0396	4.23435	6.98377	0.0219838	2.99006	33.5799	14.6887	4.2254	31.7546	12.3318
Os07G0622000	Serine/threonine protein kinase, Hyperosmotic stress response, Abscisic acid (ABA)-dependent gene regulation	-	1.0629	-1.24	-	-	42.3555	73.4786	58.0988	98.9861	27.3644	44.4972	35.0775	125.145	85.5715	39.4785
Os01G0892800	Similar to Ankyrin-kinase	-	6.4441	-5.9441	-	-	0.0397328	12.9507	0.672684	0.811225	0.634117	0.146457	0.148338	37.7691	1.02243	1.02476
Os04G0598900	Similar to Wall-associated kinase-like protein.	-	-	-2.0258	-	-	0.76234	3.95897	6.30773	5.30964	15.0055	2.10752	1.296	23.4247	5.63287	17.6209
Os10G0180800	Wall-associated kinase, Negative regulation of rice blast resistance	-	-2.5712	-1.365	-	-	47.0253	2.09062	50.0266	86.9072	15.8269	28.9265	12.391	117.508	100.634	14.6481
Os02G0151800	Similar to Ca2+/calmodulin-dependent protein kinase phosphatase.	-4.9572	-5.6837	-6.0188	-	-4.6909	3.95923	1.844	0.830101	64.7922	1.0293	122.777	94.5239	49.0838	76.231	29.1814
Os11G0672300	Similar to Protein kinase domain containing protein,	2.4468	3.0674	2.294	2.8491	2.5844	54.4172	81.4496	70.2774	138.955	86.0855	9.96323	9.69023	13.0683	20.2305	15.7546

## Sheet: S5
Table S5. Summary of GO terms related to the differentially expressed genes in CBB23 and JG30.
GO accessions	term type	Term	query item	background item	background total	pvalue	FDR	entries
GO:0043231	C	intracellular membrane-bounded organelle	623	15750	35698	7.6e-46	1e-43	// Os05g0136900 // Os05g0217800 // Os01g0259900 // Os01g0940800 // Os07g0477500 // Os05g0119300 // Os04g0624600 // Os08g0433600 // Os07g0179300 // Os07g0540600 // Os06g0717100 // Os01g0733500 // Os03g0348200 // Os04g0320700 // Os09g0497400 // Os01g0949500 // Os04g0169100 // Os03g0806600 // Os03g0285800 // Os04g0403200 // Os02g0704000 // Os09g0346500 // Os08g0498400 // Os10g0508700 // Os10g0109300…
GO:0043227	C	membrane-bounded organelle	623	15756	35698	8.7e-46	1e-43	// Os05g0136900 // Os05g0217800 // Os01g0259900 // Os01g0940800 // Os07g0477500 // Os05g0119300 // Os04g0624600 // Os08g0433600 // Os07g0179300 // Os07g0540600 // Os06g0717100 // Os01g0733500 // Os03g0348200 // Os04g0320700 // Os09g0497400 // Os01g0949500 // Os04g0169100 // Os03g0806600 // Os03g0285800 // Os04g0403200 // Os02g0704000 // Os09g0346500 // Os08g0498400 // Os10g0508700 // Os10g0109300…
GO:0043229	C	intracellular organelle	632	16138	35698	1.5e-45	1e-43	// Os05g0136900 // Os05g0217800 // Os01g0259900 // Os01g0940800 // Os07g0477500 // Os05g0119300 // Os04g0624600 // Os08g0433600 // Os07g0179300 // Os07g0540600 // Os06g0717100 // Os01g0733500 // Os03g0348200 // Os04g0320700 // Os03g0425000 // Os09g0497400 // Os01g0949500 // Os04g0169100 // Os03g0806600 // Os03g0285800 // Os04g0403200 // Os02g0704000 // Os09g0346500 // Os08g0498400 // Os10g0508700…
GO:0043226	C	organelle	632	16144	35698	1.8e-45	1e-43	// Os05g0136900 // Os05g0217800 // Os01g0259900 // Os01g0940800 // Os07g0477500 // Os05g0119300 // Os04g0624600 // Os08g0433600 // Os07g0179300 // Os07g0540600 // Os06g0717100 // Os01g0733500 // Os03g0348200 // Os04g0320700 // Os03g0425000 // Os09g0497400 // Os01g0949500 // Os04g0169100 // Os03g0806600 // Os03g0285800 // Os04g0403200 // Os02g0704000 // Os09g0346500 // Os08g0498400 // Os10g0508700…
GO:0044424	C	intracellular part	647	17108	35698	7e-42	3.2e-40	// Os05g0136900 // Os05g0217800 // Os01g0259900 // Os01g0940800 // Os07g0477500 // Os05g0119300 // Os04g0624600 // Os08g0433600 // Os07g0179300 // Os07g0540600 // Os06g0717100 // Os01g0733500 // Os03g0348200 // Os04g0320700 // Os03g0425000 // Os09g0497400 // Os01g0949500 // Os04g0169100 // Os03g0806600 // Os03g0285800 // Os04g0403200 // Os02g0704000 // Os09g0346500 // Os08g0498400 // Os10g0508700…
GO:0005622	C	intracellular	649	17282	35698	5.5e-41	2.1e-39	// Os05g0136900 // Os05g0217800 // Os01g0259900 // Os01g0940800 // Os07g0477500 // Os05g0119300 // Os04g0624600 // Os08g0433600 // Os07g0179300 // Os07g0540600 // Os06g0717100 // Os01g0733500 // Os03g0348200 // Os04g0320700 // Os03g0425000 // Os09g0497400 // Os01g0949500 // Os04g0169100 // Os03g0806600 // Os03g0285800 // Os04g0403200 // Os02g0704000 // Os09g0346500 // Os08g0498400 // Os10g0508700…
GO:0044464	C	cell part	660	17860	35698	8.5e-40	2.4e-38	// Os05g0136900 // Os05g0217800 // Os01g0259900 // Os01g0940800 // Os07g0477500 // Os05g0119300 // Os04g0624600 // Os08g0433600 // Os07g0179300 // Os07g0540600 // Os06g0717100 // Os01g0733500 // Os03g0348200 // Os04g0320700 // Os03g0425000 // Os09g0497400 // Os01g0949500 // Os04g0169100 // Os03g0806600 // Os03g0285800 // Os04g0403200 // Os02g0704000 // Os09g0346500 // Os08g0498400 // Os10g0508700…
GO:0005623	C	cell	660	17860	35698	8.5e-40	2.4e-38	// Os05g0136900 // Os05g0217800 // Os01g0259900 // Os01g0940800 // Os07g0477500 // Os05g0119300 // Os04g0624600 // Os08g0433600 // Os07g0179300 // Os07g0540600 // Os06g0717100 // Os01g0733500 // Os03g0348200 // Os04g0320700 // Os03g0425000 // Os09g0497400 // Os01g0949500 // Os04g0169100 // Os03g0806600 // Os03g0285800 // Os04g0403200 // Os02g0704000 // Os09g0346500 // Os08g0498400 // Os10g0508700…
GO:0005737	C	cytoplasm	584	15256	35698	1.1e-35	2.8e-34	// Os05g0136900 // Os05g0217800 // Os01g0259900 // Os01g0940800 // Os07g0477500 // Os05g0119300 // Os04g0624600 // Os08g0433600 // Os07g0179300 // Os07g0540600 // Os06g0717100 // Os01g0733500 // Os03g0348200 // Os04g0320700 // Os03g0425000 // Os09g0497400 // Os01g0949500 // Os04g0169100 // Os03g0806600 // Os03g0285800 // Os04g0403200 // Os02g0704000 // Os09g0346500 // Os08g0498400 // Os10g0508700…
GO:0044444	C	cytoplasmic part	571	14862	35698	1e-34	2.4e-33	// Os05g0136900 // Os05g0217800 // Os01g0259900 // Os01g0940800 // Os07g0477500 // Os05g0119300 // Os04g0624600 // Os08g0433600 // Os07g0179300 // Os07g0540600 // Os06g0717100 // Os01g0733500 // Os03g0348200 // Os04g0320700 // Os03g0425000 // Os09g0497400 // Os01g0949500 // Os04g0169100 // Os03g0806600 // Os03g0285800 // Os04g0403200 // Os02g0704000 // Os09g0346500 // Os08g0498400 // Os10g0508700…
GO:0009055	F	electron carrier activity	47	230	35698	3.4e-25	2.4e-22	// Os08g0507100 // Os06g0568600 // Os10g0512400 // Os06g0102100 // Os07g0147900 // Os03g0371300 // Os03g0140100 // Os10g0109600 // Os04g0447100 // Os02g0240300 // Os01g0190000 // Os07g0677200 // Os02g0814400 // Os04g0688100 // Os05g0101600 // Os08g0482600 // Os08g0508800 // Os04g0688300 // Os06g0547400 // Os03g0709300 // Os02g0817900 // Os07g0134800 // Os08g0509100 // Os07g0677100 // Os02g0185200…
GO:0009536	C	plastid	234	5008	35698	2e-19	4.2e-18	// Os03g0300400 // Os05g0526200 // Os03g0297600 // Os01g0101700 // Os01g0259900 // Os08g0422600 // Os02g0575700 // Os07g0147900 // Os05g0582300 // Os04g0683700 // Os01g0588900 // Os04g0624600 // Os02g0711400 // Os12g0207600 // Os07g0179300 // Os02g0275200 // Os06g0229000 // Os04g0447100 // Os01g0733500 // Os03g0348200 // Os03g0711100 // Os03g0593200 // Os02g0157700 // Os01g0769900 // Os04g0650800…
GO:0016023	C	cytoplasmic, membrane-bounded vesicle	185	4437	35698	6.8e-11	1.1e-09	// Os05g0136900 // Os03g0119300 // Os04g0598900 // Os05g0217800 // Os01g0667900 // Os03g0823400 // Os01g0940800 // Os07g0477500 // Os02g0532500 // Os11g0615900 // Os07g0540600 // Os02g0240300 // Os10g0512400 // Os04g0691900 // Os01g0717400 // Os08g0482600 // Os09g0557800 // Os07g0605400 // Os04g0586500 // Os03g0806600 // Os09g0564000 // Os04g0403200 // Os01g0382000 // Os06g0102100 // Os06g0547400…
GO:0097708	C	intracellular vesicle	185	4437	35698	6.8e-11	1.1e-09	// Os05g0136900 // Os03g0119300 // Os04g0598900 // Os05g0217800 // Os01g0667900 // Os03g0823400 // Os01g0940800 // Os07g0477500 // Os02g0532500 // Os11g0615900 // Os07g0540600 // Os02g0240300 // Os10g0512400 // Os04g0691900 // Os01g0717400 // Os08g0482600 // Os09g0557800 // Os07g0605400 // Os04g0586500 // Os03g0806600 // Os09g0564000 // Os04g0403200 // Os01g0382000 // Os06g0102100 // Os06g0547400…
GO:0031410	C	cytoplasmic vesicle	185	4437	35698	6.8e-11	1.1e-09	// Os05g0136900 // Os03g0119300 // Os04g0598900 // Os05g0217800 // Os01g0667900 // Os03g0823400 // Os01g0940800 // Os07g0477500 // Os02g0532500 // Os11g0615900 // Os07g0540600 // Os02g0240300 // Os10g0512400 // Os04g0691900 // Os01g0717400 // Os08g0482600 // Os09g0557800 // Os07g0605400 // Os04g0586500 // Os03g0806600 // Os09g0564000 // Os04g0403200 // Os01g0382000 // Os06g0102100 // Os06g0547400…
GO:0031988	C	membrane-bounded vesicle	185	4445	35698	7.8e-11	1.2e-09	// Os05g0136900 // Os03g0119300 // Os04g0598900 // Os05g0217800 // Os01g0667900 // Os03g0823400 // Os01g0940800 // Os07g0477500 // Os02g0532500 // Os11g0615900 // Os07g0540600 // Os02g0240300 // Os10g0512400 // Os04g0691900 // Os01g0717400 // Os08g0482600 // Os09g0557800 // Os07g0605400 // Os04g0586500 // Os03g0806600 // Os09g0564000 // Os04g0403200 // Os01g0382000 // Os06g0102100 // Os06g0547400…
GO:0031982	C	vesicle	185	4455	35698	9.3e-11	1.3e-09	// Os05g0136900 // Os03g0119300 // Os04g0598900 // Os05g0217800 // Os01g0667900 // Os03g0823400 // Os01g0940800 // Os07g0477500 // Os02g0532500 // Os11g0615900 // Os07g0540600 // Os02g0240300 // Os10g0512400 // Os04g0691900 // Os01g0717400 // Os08g0482600 // Os09g0557800 // Os07g0605400 // Os04g0586500 // Os03g0806600 // Os09g0564000 // Os04g0403200 // Os01g0382000 // Os06g0102100 // Os06g0547400…
GO:0004497	F	monooxygenase activity	22	152	35698	6e-10	2.1e-07	// Os08g0507100 // Os06g0568600 // Os12g0207600 // Os10g0512400 // Os06g0102100 // Os03g0371300 // Os03g0140100 // Os12g0274700 // Os02g0817900 // Os06g0501900 // Os02g0185200 // Os05g0211100 // Os05g0320700 // Os03g0223100 // Os10g0320100 // Os04g0178400 // Os06g0129900 // Os10g0144700 // Os11g0635500 // Os05g0101600 // Os02g0569900 // Os03g0225900
GO:0016829	F	lyase activity	34	398	35698	6.2e-09	1.4e-06	// Os08g0465800 // Os12g0207600 // Os02g0627100 // Os02g0573200 // Os12g0274700 // Os06g0661800 // Os01g0717400 // Os05g0402700 // Os06g0149900 // Os02g0571800 // Os02g0571100 // Os04g0518400 // Os01g0905800 // Os08g0191700 // Os08g0168000 // Os12g0291100 // Os10g0356000 // Os02g0570400 // Os08g0320400 // Os05g0427400 // Os11g0474800 // Os04g0178300 // Os04g0463500 // Os04g0498600 // Os02g0274100…
GO:0016101	P	diterpenoid metabolic process	11	42	35698	7e-08	0.0001	// Os09g0417600 // Os01g0757200 // Os11g0474800 // Os02g0571100 // Os04g0178300 // Os02g0571800 // Os08g0560000 // Os02g0570400 // Os02g0181300 // Os04g0178400 // Os03g0122300
GO:0016830	F	carbon-carbon lyase activity	17	130	35698	2e-07	3.4e-05	// Os08g0320400 // Os08g0465800 // Os05g0402700 // Os10g0356000 // Os04g0463500 // Os12g0274700 // Os01g0905800 // Os02g0573200 // Os12g0207600 // Os03g0264400 // Os01g0770200 // Os12g0291100 // Os04g0498600 // Os12g0291400 // Os08g0120600 // Os06g0661800 // Os02g0581400
GO:0005509	F	calcium ion binding	29	365	35698	3.3e-07	4.6e-05	// Os04g0598900 // Os02g0126400 // Os04g0688300 // Os10g0109600 // Os05g0382600 // Os02g0240300 // Os07g0677200 // Os06g0683400 // Os04g0688100 // Os01g0949500 // Os03g0807400 // Os06g0547400 // Os06g0254700 // Os05g0223000 // Os07g0677100 // Os10g0180800 // Os01g0963000 // Os10g0109300 // Os01g0841700 // Os01g0135700 // Os07g0681400 // Os04g0370900 // Os04g0492800 // Os07g0677500 // Os03g0235000…
GO:0016872	F	intramolecular lyase activity	7	14	35698	5.3e-07	5.4e-05	// Os06g0203600 // Os02g0571100 // Os04g0178300 // Os03g0192700 // Os12g0115700 // Os11g0116300 // Os03g0819600
GO:0016491	F	oxidoreductase activity	89	1973	35698	5.4e-07	5.4e-05	// Os03g0189400 // Os08g0507100 // Os12g0207600 // Os10g0512400 // Os06g0727200 // Os06g0102100 // Os05g0127500 // Os04g0447100 // Os02g0240300 // Os02g0601300 // Os04g0650800 // Os04g0338100 // Os08g0557600 // Os07g0677100 // Os02g0185200 // Os10g0109300 // Os02g0817900 // Os03g0235000 // Os02g0187800 // Os01g0667900 // Os10g0550900 // Os07g0677500 // Os06g0501900 // Os08g0560000 // Os01g0963000…
GO:0009685	P	gibberellin metabolic process	8	22	35698	5.6e-07	0.00041	// Os09g0417600 // Os01g0757200 // Os02g0571800 // Os02g0571100 // Os04g0178300 // Os08g0560000 // Os02g0181300 // Os03g0122300
GO:0006721	P	terpenoid metabolic process	13	96	35698	3.7e-06	0.0018	// Os09g0417600 // Os11g0572700 // Os07g0190000 // Os01g0757200 // Os11g0474800 // Os02g0571100 // Os04g0178300 // Os02g0571800 // Os08g0560000 // Os02g0570400 // Os02g0181300 // Os04g0178400 // Os03g0122300
GO:0051501	P	diterpene phytoalexin metabolic process	6	16	35698	1.3e-05	0.0048	// Os11g0474800 // Os02g0571800 // Os02g0571100 // Os04g0178300 // Os02g0570400 // Os04g0178400
GO:0020037	F	heme binding	36	621	35698	1.4e-05	0.0012	// Os08g0507100 // Os06g0568600 // Os10g0512400 // Os06g0727200 // Os06g0102100 // Os02g0115700 // Os03g0371300 // Os03g0140100 // Os10g0109600 // Os02g0240300 // Os07g0677200 // Os02g0814400 // Os04g0688100 // Os04g0688300 // Os06g0547400 // Os02g0817900 // Os06g0501900 // Os07g0677100 // Os02g0185200 // Os05g0211100 // Os10g0109300 // Os05g0320700 // Os12g0448900 // Os03g0223100 // Os10g0320100…
GO:0016984	F	ribulose-bisphosphate carboxylase activity	5	9	35698	1.6e-05	0.0013	// Os12g0291400 // Os12g0207600 // Os12g0274700 // Os10g0356000 // Os12g0291100
GO:0046906	F	tetrapyrrole binding	36	651	35698	3.5e-05	0.0024	// Os08g0507100 // Os06g0568600 // Os10g0512400 // Os06g0727200 // Os06g0102100 // Os02g0115700 // Os03g0371300 // Os03g0140100 // Os10g0109600 // Os02g0240300 // Os07g0677200 // Os02g0814400 // Os04g0688100 // Os04g0688300 // Os06g0547400 // Os02g0817900 // Os06g0501900 // Os07g0677100 // Os02g0185200 // Os05g0211100 // Os10g0109300 // Os05g0320700 // Os12g0448900 // Os03g0223100 // Os10g0320100…
GO:0006720	P	isoprenoid metabolic process	13	122	35698	3.9e-05	0.011	// Os09g0417600 // Os11g0572700 // Os07g0190000 // Os01g0757200 // Os11g0474800 // Os02g0571100 // Os04g0178300 // Os02g0571800 // Os08g0560000 // Os02g0570400 // Os02g0181300 // Os04g0178400 // Os03g0122300
GO:0006082	P	organic acid metabolic process	46	960	35698	8.7e-05	0.019	// Os08g0320400 // Os08g0465800 // Os01g0757200 // Os08g0508800 // Os01g0760600 // Os08g0447000 // Os02g0627100 // Os04g0447100 // Os12g0145700 // Os03g0122300 // Os11g0659500 // Os05g0402700 // Os04g0650800 // Os02g0571100 // Os04g0518400 // Os01g0905800 // Os01g0529800 // Os02g0581400 // Os03g0815200 // Os02g0181300 // Os03g0157900 // Os07g0134800 // Os01g0770200 // Os03g0710800 // Os05g0427400…
GO:0006091	P	generation of precursor metabolites and energy	26	425	35698	9.2e-05	0.019	// Os08g0507100 // Os01g0760600 // Os12g0145700 // Os05g0402700 // Os08g0508800 // Os08g0557600 // Os01g0869800 // Os01g0905800 // Os01g0600900 // Os06g0501900 // Os09g0346500 // Os03g0735000 // Os01g0720500 // Os05g0211100 // Os10g0320100 // Os08g0434300 // Os07g0147900 // Os07g0695800 // Os04g0457000 // Os10g0144700 // Os07g0134800 // Os02g0739600 // Os05g0101600 // Os02g0569900 // Os04g0677500…
GO:0004601	F	peroxidase activity	16	196	35698	0.0001	0.0065	// Os04g0688100 // Os07g0677100 // Os02g0115700 // Os06g0727200 // Os10g0109300 // Os01g0963000 // Os12g0448900 // Os04g0688300 // Os03g0235000 // Os06g0547400 // Os10g0109600 // Os02g0240300 // Os07g0677200 // Os01g0855200 // Os02g0236800 // Os07g0677500
GO:0016684	F	oxidoreductase activity, acting on peroxide as acceptor	16	199	35698	0.00012	0.0065	// Os04g0688100 // Os07g0677100 // Os02g0115700 // Os06g0727200 // Os10g0109300 // Os01g0963000 // Os12g0448900 // Os04g0688300 // Os03g0235000 // Os06g0547400 // Os10g0109600 // Os02g0240300 // Os07g0677200 // Os01g0855200 // Os02g0236800 // Os07g0677500
GO:0016831	F	carboxy-lyase activity	10	83	35698	0.00012	0.0065	// Os08g0320400 // Os08g0465800 // Os12g0207600 // Os04g0498600 // Os01g0770200 // Os12g0291100 // Os12g0291400 // Os12g0274700 // Os10g0356000 // Os02g0581400
GO:1901564	P	organonitrogen compound metabolic process	72	1768	35698	0.00015	0.028	// Os08g0320400 // Os08g0465800 // Os02g0168800 // Os05g0243200 // Os01g0760600 // Os04g0476100 // Os01g0588900 // Os09g0556500 // Os07g0112800 // Os03g0177500 // Os12g0145700 // Os01g0896700 // Os06g0647100 // Os03g0196800 // Os10g0550900 // Os05g0402700 // Os04g0650800 // Os03g0425000 // Os02g0822600 // Os10g0100700 // Os04g0518400 // Os01g0905800 // Os09g0442600 // Os02g0581400 // Os04g0493400…
GO:0030145	F	manganese ion binding	8	59	35698	0.00027	0.014	// Os03g0761100 // Os03g0292100 // Os07g0150700 // Os02g0532500 // Os01g0292200 // Os07g0678300 // Os09g0418000 // Os12g0434400
GO:0015977	P	carbon fixation	5	20	35698	0.00035	0.051	// Os12g0291400 // Os12g0207600 // Os12g0274700 // Os10g0356000 // Os12g0291100
GO:0052314	P	phytoalexin metabolic process	6	32	35698	0.00035	0.051	// Os11g0474800 // Os02g0571800 // Os02g0571100 // Os04g0178300 // Os02g0570400 // Os04g0178400
GO:0016209	F	antioxidant activity	16	226	35698	0.00046	0.021	// Os04g0688100 // Os07g0677100 // Os02g0115700 // Os06g0727200 // Os10g0109300 // Os01g0963000 // Os12g0448900 // Os04g0688300 // Os03g0235000 // Os06g0547400 // Os10g0109600 // Os02g0240300 // Os07g0677200 // Os01g0855200 // Os02g0236800 // Os07g0677500
GO:0016702	F	oxidoreductase activity, acting on single donors with incorporation of molecular oxygen, incorporation of two atoms of oxygen	7	56	35698	0.001	0.044	// Os02g0771600 // Os08g0508800 // Os02g0194700 // Os05g0127500 // Os08g0560000 // Os04g0447100 // Os08g0509100
GO:0005739	C	mitochondrion	138	4111	35698	0.001	0.014	// Os12g0231000 // Os04g0400000 // Os05g0119300 // Os02g0140400 // Os08g0433600 // Os06g0260000 // Os06g0717100 // Os01g0719100 // Os01g0606900 // Os04g0320700 // Os04g0218400 // Os09g0497400 // Os01g0949500 // Os07g0142100 // Os11g0545300 // Os07g0227800 // Os03g0621400 // Os03g0252100 // Os04g0196200 // Os08g0498400 // Os02g0460200 // Os10g0525400 // Os10g0376200 // Os01g0900800 // Os03g0184300…
GO:0009404	P	toxin metabolic process	6	43	35698	0.0014	0.15	// Os11g0474800 // Os02g0571800 // Os02g0571100 // Os04g0178300 // Os02g0570400 // Os04g0178400
GO:0003700	F	transcription factor activity, sequence-specific DNA binding	36	803	35698	0.0015	0.058	// Os02g0655200 // Os03g0183200 // Os09g0287000 // Os05g0322900 // Os09g0457900 // Os05g0343400 // Os09g0474000 // Os09g0522000 // Os02g0764700 // Os09g0522100 // Os05g0497300 // Os07g0619600 // Os02g0181300 // Os04g0637000 // Os02g0677300 // Os07g0680400 // Os09g0417600 // Os02g0527300 // Os06g0552900 // Os05g0537100 // Os01g0821600 // Os06g0127100 // Os02g0203000 // Os09g0334500 // Os09g0434500…
GO:0001071	F	nucleic acid binding transcription factor activity	36	803	35698	0.0015	0.058	// Os02g0655200 // Os03g0183200 // Os09g0287000 // Os05g0322900 // Os09g0457900 // Os05g0343400 // Os09g0474000 // Os09g0522000 // Os02g0764700 // Os09g0522100 // Os05g0497300 // Os07g0619600 // Os02g0181300 // Os04g0637000 // Os02g0677300 // Os07g0680400 // Os09g0417600 // Os02g0527300 // Os06g0552900 // Os05g0537100 // Os01g0821600 // Os06g0127100 // Os02g0203000 // Os09g0334500 // Os09g0434500…
GO:0006757	P	ATP generation from ADP	8	80	35698	0.0017	0.15	// Os05g0402700 // Os07g0695800 // Os02g0739600 // Os08g0434300 // Os01g0905800 // Os12g0145700 // Os04g0677500 // Os08g0120600
GO:0006096	P	glycolytic process	8	80	35698	0.0017	0.15	// Os05g0402700 // Os07g0695800 // Os02g0739600 // Os08g0434300 // Os01g0905800 // Os12g0145700 // Os04g0677500 // Os08g0120600
GO:0046031	P	ADP metabolic process	8	81	35698	0.0018	0.15	// Os05g0402700 // Os07g0695800 // Os02g0739600 // Os08g0434300 // Os01g0905800 // Os12g0145700 // Os04g0677500 // Os08g0120600
GO:0009179	P	purine ribonucleoside diphosphate metabolic process	8	81	35698	0.0018	0.15	// Os05g0402700 // Os07g0695800 // Os02g0739600 // Os08g0434300 // Os01g0905800 // Os12g0145700 // Os04g0677500 // Os08g0120600
GO:0009135	P	purine nucleoside diphosphate metabolic process	8	81	35698	0.0018	0.15	// Os05g0402700 // Os07g0695800 // Os02g0739600 // Os08g0434300 // Os01g0905800 // Os12g0145700 // Os04g0677500 // Os08g0120600
GO:0009185	P	ribonucleoside diphosphate metabolic process	8	81	35698	0.0018	0.15	// Os05g0402700 // Os07g0695800 // Os02g0739600 // Os08g0434300 // Os01g0905800 // Os12g0145700 // Os04g0677500 // Os08g0120600
GO:0019748	P	secondary metabolic process	13	187	35698	0.0018	0.15	// Os02g0571800 // Os05g0427400 // Os02g0626100 // Os11g0474800 // Os02g0571100 // Os04g0178300 // Os04g0178400 // Os04g0518400 // Os02g0627100 // Os02g0187800 // Os02g0570400 // Os02g0697400 // Os02g0177600
GO:0008237	F	metallopeptidase activity	8	81	35698	0.0018	0.067	// Os02g0771600 // Os03g0151800 // Os07g0524900 // Os04g0581100 // Os06g0720700 // Os06g0229000 // Os05g0127500 // Os12g0434400
GO:0006869	P	lipid transport	11	149	35698	0.0025	0.19	// Os03g0103200 // Os11g0116000 // Os03g0718800 // Os12g0115500 // Os05g0550300 // Os12g0115100 // Os11g0116200 // Os11g0115400 // Os10g0505700 // Os03g0103300 // Os12g0115300
GO:0030170	F	pyridoxal phosphate binding	10	128	35698	0.0026	0.088	// Os08g0465800 // Os06g0149900 // Os11g0516000 // Os01g0760600 // Os05g0105000 // Os03g0157900 // Os03g0643300 // Os10g0517500 // Os01g0770200 // Os01g0717400
GO:0016701	F	oxidoreductase activity, acting on single donors with incorporation of molecular oxygen	7	67	35698	0.0026	0.088	// Os02g0771600 // Os08g0508800 // Os02g0194700 // Os05g0127500 // Os08g0560000 // Os04g0447100 // Os08g0509100
GO:0009765	P	photosynthesis, light harvesting	5	34	35698	0.0028	0.19	// Os09g0346500 // Os01g0600900 // Os01g0869800 // Os01g0720500 // Os04g0457000
GO:0009063	P	cellular amino acid catabolic process	6	50	35698	0.0028	0.19	// Os05g0427400 // Os02g0626100 // Os02g0627100 // Os04g0518400 // Os02g0581400 // Os10g0550900
GO:0000287	F	magnesium ion binding	12	174	35698	0.0028	0.088	// Os12g0207600 // Os11g0474800 // Os02g0571100 // Os04g0178300 // Os03g0761100 // Os03g0292100 // Os02g0570400 // Os08g0168000 // Os12g0145700 // Os03g0712700 // Os04g0677500 // Os02g0581400
GO:0006165	P	nucleoside diphosphate phosphorylation	8	88	35698	0.0029	0.19	// Os05g0402700 // Os07g0695800 // Os02g0739600 // Os08g0434300 // Os01g0905800 // Os12g0145700 // Os04g0677500 // Os08g0120600
GO:0046034	P	ATP metabolic process	12	176	35698	0.003	0.19	// Os05g0402700 // Os07g0695800 // Os06g0568200 // Os08g0120600 // Os02g0176700 // Os02g0739600 // Os08g0434300 // Os03g0278900 // Os01g0905800 // Os12g0145700 // Os04g0677500 // Os07g0134800
GO:0006915	P	apoptotic process	6	52	35698	0.0033	0.2	// Os11g0588600 // Os12g0516300 // Os11g0588400 // Os09g0517200 // Os11g0633500 // Os11g0605100
GO:0010876	P	lipid localization	11	157	35698	0.0036	0.21	// Os03g0103200 // Os11g0116000 // Os03g0718800 // Os12g0115500 // Os05g0550300 // Os12g0115100 // Os11g0116200 // Os11g0115400 // Os10g0505700 // Os03g0103300 // Os12g0115300
GO:0009132	P	nucleoside diphosphate metabolic process	8	92	35698	0.0038	0.21	// Os05g0402700 // Os07g0695800 // Os02g0739600 // Os08g0434300 // Os01g0905800 // Os12g0145700 // Os04g0677500 // Os08g0120600
GO:0051082	F	unfolded protein binding	9	113	35698	0.0038	0.11	// Os04g0549600 // Os06g0716700 // Os01g0730500 // Os12g0514500 // Os08g0487800 // Os03g0807400 // Os03g0648400 // Os06g0650900 // Os09g0474300
GO:0016853	F	isomerase activity	13	211	35698	0.0047	0.14	// Os06g0203600 // Os11g0572700 // Os02g0571100 // Os04g0178300 // Os02g0140400 // Os06g0281400 // Os02g0274100 // Os03g0192700 // Os12g0115700 // Os03g0712700 // Os11g0116300 // Os03g0819600 // Os06g0476200
GO:0009167	P	purine ribonucleoside monophosphate metabolic process	12	192	35698	0.0058	0.3	// Os05g0402700 // Os07g0695800 // Os06g0568200 // Os08g0120600 // Os02g0176700 // Os02g0739600 // Os08g0434300 // Os03g0278900 // Os01g0905800 // Os12g0145700 // Os04g0677500 // Os07g0134800
GO:0009126	P	purine nucleoside monophosphate metabolic process	12	192	35698	0.0058	0.3	// Os05g0402700 // Os07g0695800 // Os06g0568200 // Os08g0120600 // Os02g0176700 // Os02g0739600 // Os08g0434300 // Os03g0278900 // Os01g0905800 // Os12g0145700 // Os04g0677500 // Os07g0134800
GO:0006090	P	pyruvate metabolic process	8	100	35698	0.006	0.3	// Os05g0402700 // Os07g0695800 // Os02g0739600 // Os08g0434300 // Os01g0905800 // Os12g0145700 // Os04g0677500 // Os08g0120600
GO:0044281	P	small molecule metabolic process	57	1550	35698	0.0062	0.3	// Os08g0320400 // Os08g0465800 // Os01g0757200 // Os08g0508800 // Os01g0760600 // Os08g0447000 // Os02g0627100 // Os11g0455500 // Os02g0176700 // Os03g0192700 // Os04g0447100 // Os12g0145700 // Os02g0601300 // Os03g0122300 // Os11g0659500 // Os05g0402700 // Os04g0650800 // Os02g0571800 // Os02g0571100 // Os10g0100700 // Os04g0518400 // Os01g0905800 // Os01g0529800 // Os02g0581400 // Os03g0815200…
GO:0016998	P	cell wall macromolecule catabolic process	5	42	35698	0.0064	0.3	// Os11g0592100 // Os11g0592000 // Os10g0524300 // Os04g0493400 // Os11g0592200
GO:0016840	F	carbon-nitrogen lyase activity	5	42	35698	0.0064	0.18	// Os05g0427400 // Os10g0543500 // Os04g0518400 // Os02g0626100 // Os02g0627100
GO:0046939	P	nucleotide phosphorylation	8	102	35698	0.0067	0.31	// Os05g0402700 // Os07g0695800 // Os02g0739600 // Os08g0434300 // Os01g0905800 // Os12g0145700 // Os04g0677500 // Os08g0120600
GO:0016052	P	carbohydrate catabolic process	11	176	35698	0.008	0.35	// Os05g0402700 // Os07g0695800 // Os07g0543300 // Os02g0739600 // Os03g0141200 // Os08g0434300 // Os01g0905800 // Os12g0145700 // Os04g0677500 // Os08g0120600 // Os10g0465700
GO:0046395	P	carboxylic acid catabolic process	7	84	35698	0.0081	0.35	// Os05g0427400 // Os02g0626100 // Os04g0518400 // Os02g0627100 // Os02g0581400 // Os10g0550900 // Os02g0274100
GO:0004872	F	receptor activity	8	107	35698	0.0087	0.23	// Os08g0174700 // Os03g0772600 // Os02g0154200 // Os06g0493600 // Os04g0169100 // Os12g0101800 // Os11g0102200 // Os02g0228300
GO:1901605	P	alpha-amino acid metabolic process	13	230	35698	0.009	0.37	// Os03g0710800 // Os08g0320400 // Os08g0465800 // Os04g0650800 // Os04g0463500 // Os01g0760600 // Os08g0447000 // Os03g0815200 // Os03g0291500 // Os06g0149900 // Os03g0264400 // Os03g0157900 // Os10g0550900
GO:0009161	P	ribonucleoside monophosphate metabolic process	12	205	35698	0.0092	0.37	// Os05g0402700 // Os07g0695800 // Os06g0568200 // Os08g0120600 // Os02g0176700 // Os02g0739600 // Os08g0434300 // Os03g0278900 // Os01g0905800 // Os12g0145700 // Os04g0677500 // Os07g0134800
GO:0005198	F	structural molecule activity	23	510	35698	0.0092	0.23	// Os05g0243200 // Os03g0843400 // Os01g0896700 // Os06g0647100 // Os03g0425000 // Os02g0822600 // Os03g0196800 // Os04g0691600 // Os03g0769100 // Os01g0662300 // Os03g0815400 // Os07g0173700 // Os07g0574800 // Os12g0104800 // Os01g0633000 // Os01g0805900 // Os01g0678600 // Os05g0101400 // Os06g0671900 // Os03g0219900 // Os06g0731800 // Os01g0896800 // Os05g0541900
GO:0006520	P	cellular amino acid metabolic process	17	339	35698	0.0094	0.37	// Os05g0427400 // Os09g0556500 // Os04g0650800 // Os02g0626100 // Os04g0463500 // Os01g0760600 // Os04g0518400 // Os02g0627100 // Os08g0447000 // Os03g0815200 // Os03g0291500 // Os06g0149900 // Os03g0157900 // Os10g0550900 // Os10g0517500 // Os01g0770200 // Os02g0581400
GO:0072524	P	pyridine-containing compound metabolic process	9	132	35698	0.0095	0.37	// Os05g0402700 // Os07g0695800 // Os10g0100700 // Os02g0739600 // Os08g0434300 // Os01g0905800 // Os12g0145700 // Os04g0677500 // Os08g0120600
GO:0016903	F	oxidoreductase activity, acting on the aldehyde or oxo group of donors	6	66	35698	0.0095	0.23	// Os08g0126300 // Os08g0424500 // Os02g0739600 // Os11g0186200 // Os07g0695800 // Os02g0601300
GO:0048037	F	cofactor binding	27	631	35698	0.0096	0.23	// Os08g0465800 // Os01g0760600 // Os04g0476100 // Os07g0564500 // Os02g0601300 // Os08g0114300 // Os01g0717400 // Os11g0659500 // Os04g0650800 // Os11g0516000 // Os08g0162800 // Os08g0557600 // Os05g0105000 // Os03g0157900 // Os08g0126300 // Os03g0643300 // Os01g0770200 // Os02g0274100 // Os07g0147900 // Os07g0695800 // Os10g0517500 // Os11g0572700 // Os07g0134800 // Os08g0447000 // Os06g0149900…
GO:0006928	P	movement of cell or subcellular component	6	67	35698	0.01	0.37	// Os01g0805900 // Os01g0949500 // Os06g0671900 // Os01g0135700 // Os07g0574800 // Os05g0223000
GO:0044724	P	single-organism carbohydrate catabolic process	8	110	35698	0.01	0.37	// Os05g0402700 // Os07g0695800 // Os02g0739600 // Os08g0434300 // Os01g0905800 // Os12g0145700 // Os04g0677500 // Os08g0120600
GO:0009123	P	nucleoside monophosphate metabolic process	12	209	35698	0.011	0.38	// Os05g0402700 // Os07g0695800 // Os06g0568200 // Os08g0120600 // Os02g0176700 // Os02g0739600 // Os08g0434300 // Os03g0278900 // Os01g0905800 // Os12g0145700 // Os04g0677500 // Os07g0134800
GO:0016054	P	organic acid catabolic process	7	90	35698	0.011	0.4	// Os05g0427400 // Os02g0626100 // Os04g0518400 // Os02g0627100 // Os02g0581400 // Os10g0550900 // Os02g0274100
GO:0019752	P	carboxylic acid metabolic process	33	834	35698	0.013	0.44	// Os08g0465800 // Os08g0508800 // Os01g0760600 // Os02g0627100 // Os04g0447100 // Os12g0145700 // Os11g0659500 // Os05g0402700 // Os04g0650800 // Os04g0518400 // Os01g0905800 // Os02g0581400 // Os03g0815200 // Os03g0157900 // Os08g0509100 // Os05g0427400 // Os09g0556500 // Os01g0529800 // Os04g0463500 // Os08g0434300 // Os03g0291500 // Os07g0695800 // Os10g0517500 // Os10g0550900 // Os02g0626100…
GO:0043436	P	oxoacid metabolic process	33	851	35698	0.017	0.55	// Os08g0465800 // Os08g0508800 // Os01g0760600 // Os02g0627100 // Os04g0447100 // Os12g0145700 // Os11g0659500 // Os05g0402700 // Os04g0650800 // Os04g0518400 // Os01g0905800 // Os02g0581400 // Os03g0815200 // Os03g0157900 // Os08g0509100 // Os05g0427400 // Os09g0556500 // Os01g0529800 // Os04g0463500 // Os08g0434300 // Os03g0291500 // Os07g0695800 // Os10g0517500 // Os10g0550900 // Os02g0626100…
GO:0044710	P	single-organism metabolic process	124	3970	35698	0.017	0.55	// Os03g0189400 // Os08g0507100 // Os12g0207600 // Os07g0147900 // Os04g0624600 // Os04g0447100 // Os02g0240300 // Os02g0601300 // Os10g0517500 // Os05g0402700 // Os04g0650800 // Os04g0338100 // Os08g0557600 // Os04g0518400 // Os01g0905800 // Os07g0677100 // Os01g0858900 // Os07g0424400 // Os10g0109300 // Os07g0529600 // Os03g0235000 // Os02g0187800 // Os07g0642200 // Os10g0550900 // Os07g0677500…
GO:1901566	P	organonitrogen compound biosynthetic process	44	1210	35698	0.018	0.56	// Os02g0168800 // Os05g0243200 // Os09g0556500 // Os07g0112800 // Os03g0177500 // Os01g0896700 // Os10g0550900 // Os04g0650800 // Os03g0425000 // Os02g0822600 // Os10g0100700 // Os03g0157900 // Os03g0196800 // Os04g0691600 // Os03g0710800 // Os01g0631200 // Os01g0662300 // Os08g0424500 // Os03g0769100 // Os06g0568200 // Os02g0176700 // Os01g0794500 // Os07g0529600 // Os03g0815400 // Os01g0178500…
GO:0046496	P	nicotinamide nucleotide metabolic process	8	124	35698	0.019	0.57	// Os05g0402700 // Os07g0695800 // Os02g0739600 // Os08g0434300 // Os01g0905800 // Os12g0145700 // Os04g0677500 // Os08g0120600
GO:0005975	P	carbohydrate metabolic process	39	1052	35698	0.019	0.57	// Os04g0409200 // Os12g0207600 // Os01g0940800 // Os04g0624600 // Os01g0944700 // Os01g0905800 // Os03g0192700 // Os12g0145700 // Os02g0601300 // Os12g0274700 // Os05g0402700 // Os07g0695800 // Os01g0940700 // Os08g0237000 // Os01g0713200 // Os01g0858900 // Os06g0356800 // Os03g0712700 // Os06g0573600 // Os08g0126300 // Os10g0492900 // Os03g0735000 // Os07g0424400 // Os05g0375400 // Os02g0698000…
GO:0006457	P	protein folding	11	202	35698	0.02	0.58	// Os06g0196900 // Os04g0549600 // Os06g0716700 // Os01g0730500 // Os12g0514500 // Os08g0487800 // Os03g0807400 // Os03g0648400 // Os03g0859700 // Os06g0650900 // Os09g0474300
GO:0019362	P	pyridine nucleotide metabolic process	8	125	35698	0.02	0.58	// Os05g0402700 // Os07g0695800 // Os02g0739600 // Os08g0434300 // Os01g0905800 // Os12g0145700 // Os04g0677500 // Os08g0120600
GO:0022900	P	electron transport chain	11	204	35698	0.021	0.6	// Os08g0507100 // Os10g0144700 // Os05g0211100 // Os06g0501900 // Os08g0557600 // Os02g0569900 // Os05g0101600 // Os10g0320100 // Os07g0147900 // Os08g0508800 // Os07g0134800
GO:0009698	P	phenylpropanoid metabolic process	7	107	35698	0.025	0.71	// Os05g0427400 // Os02g0626100 // Os04g0518400 // Os02g0627100 // Os02g0187800 // Os02g0697400 // Os02g0177600
GO:0003735	F	structural constituent of ribosome	18	416	35698	0.028	0.64	// Os01g0678600 // Os05g0101400 // Os01g0662300 // Os03g0769100 // Os05g0243200 // Os03g0425000 // Os02g0822600 // Os03g0815400 // Os01g0896800 // Os07g0173700 // Os06g0647100 // Os03g0843400 // Os03g0219900 // Os01g0896700 // Os03g0196800 // Os04g0691600 // Os01g0633000 // Os05g0541900
GO:0004180	F	carboxypeptidase activity	5	64	35698	0.03	0.67	// Os07g0524900 // Os06g0720700 // Os10g0101200 // Os03g0151800 // Os06g0647400
GO:0016114	P	terpenoid biosynthetic process	5	68	35698	0.037	1	// Os11g0572700 // Os04g0178300 // Os07g0190000 // Os04g0178400 // Os02g0571100
GO:0006733	P	oxidoreduction coenzyme metabolic process	8	144	35698	0.039	1	// Os05g0402700 // Os07g0695800 // Os02g0739600 // Os08g0434300 // Os01g0905800 // Os12g0145700 // Os04g0677500 // Os08g0120600
GO:0009199	P	ribonucleoside triphosphate metabolic process	12	256	35698	0.04	1	// Os05g0402700 // Os07g0695800 // Os06g0568200 // Os08g0120600 // Os02g0176700 // Os02g0739600 // Os08g0434300 // Os03g0278900 // Os01g0905800 // Os12g0145700 // Os04g0677500 // Os07g0134800
GO:0009205	P	purine ribonucleoside triphosphate metabolic process	12	256	35698	0.04	1	// Os05g0402700 // Os07g0695800 // Os06g0568200 // Os08g0120600 // Os02g0176700 // Os02g0739600 // Os08g0434300 // Os03g0278900 // Os01g0905800 // Os12g0145700 // Os04g0677500 // Os07g0134800
GO:0009144	P	purine nucleoside triphosphate metabolic process	12	256	35698	0.04	1	// Os05g0402700 // Os07g0695800 // Os06g0568200 // Os08g0120600 // Os02g0176700 // Os02g0739600 // Os08g0434300 // Os03g0278900 // Os01g0905800 // Os12g0145700 // Os04g0677500 // Os07g0134800
GO:0044723	P	single-organism carbohydrate metabolic process	21	530	35698	0.041	1	// Os03g0735000 // Os08g0434300 // Os05g0402700 // Os07g0695800 // Os07g0424400 // Os12g0274700 // Os08g0445700 // Os08g0126300 // Os02g0739600 // Os04g0429600 // Os04g0624600 // Os02g0594900 // Os12g0207600 // Os01g0905800 // Os01g0858900 // Os03g0192700 // Os12g0145700 // Os04g0677500 // Os02g0601300 // Os08g0120600 // Os01g0911200
GO:0009141	P	nucleoside triphosphate metabolic process	12	259	35698	0.043	1	// Os05g0402700 // Os07g0695800 // Os06g0568200 // Os08g0120600 // Os02g0176700 // Os02g0739600 // Os08g0434300 // Os03g0278900 // Os01g0905800 // Os12g0145700 // Os04g0677500 // Os07g0134800
GO:0006629	P	lipid metabolic process	32	890	35698	0.043	1	// Os02g0802700 // Os01g0214200 // Os01g0757200 // Os04g0178400 // Os06g0351500 // Os01g0529800 // Os03g0192700 // Os02g0589000 // Os03g0122300 // Os02g0653900 // Os11g0659500 // Os02g0571800 // Os02g0571100 // Os09g0535900 // Os03g0365200 // Os02g0570400 // Os01g0223200 // Os02g0181300 // Os11g0474800 // Os04g0178300 // Os02g0814000 // Os02g0274100 // Os11g0209700 // Os07g0642200 // Os09g0417600…
GO:0044255	P	cellular lipid metabolic process	21	533	35698	0.043	1	// Os09g0417600 // Os11g0659500 // Os11g0209700 // Os01g0757200 // Os11g0474800 // Os02g0571100 // Os04g0178300 // Os07g0190000 // Os08g0307400 // Os02g0571800 // Os02g0802700 // Os02g0731900 // Os08g0560000 // Os11g0572700 // Os01g0529800 // Os02g0274100 // Os02g0181300 // Os03g0192700 // Os04g0178400 // Os03g0122300 // Os02g0570400
GO:0009150	P	purine ribonucleotide metabolic process	13	294	35698	0.048	1	// Os05g0402700 // Os07g0695800 // Os06g0568200 // Os08g0120600 // Os09g0442600 // Os02g0176700 // Os02g0739600 // Os08g0434300 // Os03g0278900 // Os01g0905800 // Os12g0145700 // Os04g0677500 // Os07g0134800
GO:0004553	F	hydrolase activity, hydrolyzing O-glycosyl compounds	19	481	35698	0.051	1	// Os11g0592000 // Os04g0409200 // Os05g0375400 // Os11g0592100 // Os01g0940800 // Os04g0474300 // Os07g0543300 // Os01g0940700 // Os06g0697000 // Os08g0237000 // Os01g0944700 // Os04g0493400 // Os10g0465700 // Os11g0592200 // Os06g0573600 // Os06g0356800 // Os03g0141200 // Os10g0492900 // Os01g0713200
GO:0008238	F	exopeptidase activity	6	100	35698	0.051	1	// Os03g0151800 // Os07g0524900 // Os06g0647400 // Os06g0720700 // Os12g0434400 // Os10g0101200
GO:0006412	P	translation	25	678	35698	0.054	1	// Os05g0243200 // Os07g0112800 // Os03g0177500 // Os01g0896700 // Os06g0647100 // Os03g0425000 // Os02g0822600 // Os11g0544800 // Os03g0196800 // Os04g0691600 // Os01g0662300 // Os09g0556500 // Os03g0769100 // Os01g0794500 // Os03g0815400 // Os01g0178500 // Os07g0173700 // Os03g0843400 // Os12g0541500 // Os01g0633000 // Os01g0678600 // Os05g0101400 // Os03g0219900 // Os01g0896800 // Os05g0541900
GO:2001141	P	regulation of RNA biosynthetic process	53	1632	35698	0.057	1	// Os11g0143300 // Os03g0180900 // Os04g0610400 // Os02g0655200 // Os12g0101800 // Os03g0183200 // Os09g0287000 // Os05g0322900 // Os09g0457900 // Os11g0102200 // Os05g0343400 // Os01g0821600 // Os09g0522000 // Os07g0583600 // Os02g0764700 // Os09g0522100 // Os05g0497300 // Os04g0169100 // Os05g0178600 // Os03g0181100 // Os03g0402800 // Os05g0100500 // Os04g0637000 // Os05g0537100 // Os02g0677300…
GO:0006355	P	regulation of transcription, DNA-templated	53	1632	35698	0.057	1	// Os11g0143300 // Os03g0180900 // Os04g0610400 // Os02g0655200 // Os12g0101800 // Os03g0183200 // Os09g0287000 // Os05g0322900 // Os09g0457900 // Os11g0102200 // Os05g0343400 // Os01g0821600 // Os09g0522000 // Os07g0583600 // Os02g0764700 // Os09g0522100 // Os05g0497300 // Os04g0169100 // Os05g0178600 // Os03g0181100 // Os03g0402800 // Os05g0100500 // Os04g0637000 // Os05g0537100 // Os02g0677300…
GO:1903506	P	regulation of nucleic acid-templated transcription	53	1632	35698	0.057	1	// Os11g0143300 // Os03g0180900 // Os04g0610400 // Os02g0655200 // Os12g0101800 // Os03g0183200 // Os09g0287000 // Os05g0322900 // Os09g0457900 // Os11g0102200 // Os05g0343400 // Os01g0821600 // Os09g0522000 // Os07g0583600 // Os02g0764700 // Os09g0522100 // Os05g0497300 // Os04g0169100 // Os05g0178600 // Os03g0181100 // Os03g0402800 // Os05g0100500 // Os04g0637000 // Os05g0537100 // Os02g0677300…
GO:0009259	P	ribonucleotide metabolic process	13	304	35698	0.059	1	// Os05g0402700 // Os07g0695800 // Os06g0568200 // Os08g0120600 // Os09g0442600 // Os02g0176700 // Os02g0739600 // Os08g0434300 // Os03g0278900 // Os01g0905800 // Os12g0145700 // Os04g0677500 // Os07g0134800
GO:0046128	P	purine ribonucleoside metabolic process	13	305	35698	0.06	1	// Os05g0402700 // Os07g0695800 // Os06g0568200 // Os08g0120600 // Os09g0442600 // Os02g0176700 // Os02g0739600 // Os08g0434300 // Os03g0278900 // Os01g0905800 // Os12g0145700 // Os04g0677500 // Os07g0134800
GO:0009116	P	nucleoside metabolic process	14	336	35698	0.061	1	// Os05g0402700 // Os07g0695800 // Os02g0613900 // Os06g0568200 // Os08g0120600 // Os09g0442600 // Os02g0176700 // Os02g0739600 // Os08g0434300 // Os03g0278900 // Os01g0905800 // Os12g0145700 // Os04g0677500 // Os07g0134800
GO:0043043	P	peptide biosynthetic process	25	688	35698	0.062	1	// Os05g0243200 // Os07g0112800 // Os03g0177500 // Os01g0896700 // Os06g0647100 // Os03g0425000 // Os02g0822600 // Os11g0544800 // Os03g0196800 // Os04g0691600 // Os01g0662300 // Os09g0556500 // Os03g0769100 // Os01g0794500 // Os03g0815400 // Os01g0178500 // Os07g0173700 // Os03g0843400 // Os12g0541500 // Os01g0633000 // Os01g0678600 // Os05g0101400 // Os03g0219900 // Os01g0896800 // Os05g0541900
GO:0042278	P	purine nucleoside metabolic process	13	306	35698	0.062	1	// Os05g0402700 // Os07g0695800 // Os06g0568200 // Os08g0120600 // Os09g0442600 // Os02g0176700 // Os02g0739600 // Os08g0434300 // Os03g0278900 // Os01g0905800 // Os12g0145700 // Os04g0677500 // Os07g0134800
GO:0005840	C	ribosome	19	494	35698	0.062	0.8	// Os03g0856500 // Os01g0678600 // Os05g0101400 // Os01g0662300 // Os03g0769100 // Os05g0243200 // Os03g0425000 // Os02g0822600 // Os03g0815400 // Os01g0896800 // Os07g0173700 // Os06g0647100 // Os03g0843400 // Os03g0219900 // Os01g0896700 // Os03g0196800 // Os04g0691600 // Os01g0633000 // Os05g0541900
GO:0043604	P	amide biosynthetic process	25	691	35698	0.064	1	// Os05g0243200 // Os07g0112800 // Os03g0177500 // Os01g0896700 // Os06g0647100 // Os03g0425000 // Os02g0822600 // Os11g0544800 // Os03g0196800 // Os04g0691600 // Os01g0662300 // Os09g0556500 // Os03g0769100 // Os01g0794500 // Os03g0815400 // Os01g0178500 // Os07g0173700 // Os03g0843400 // Os12g0541500 // Os01g0633000 // Os01g0678600 // Os05g0101400 // Os03g0219900 // Os01g0896800 // Os05g0541900
GO:0006163	P	purine nucleotide metabolic process	13	309	35698	0.065	1	// Os05g0402700 // Os07g0695800 // Os06g0568200 // Os08g0120600 // Os09g0442600 // Os02g0176700 // Os02g0739600 // Os08g0434300 // Os03g0278900 // Os01g0905800 // Os12g0145700 // Os04g0677500 // Os07g0134800
GO:0051252	P	regulation of RNA metabolic process	53	1647	35698	0.065	1	// Os11g0143300 // Os03g0180900 // Os04g0610400 // Os02g0655200 // Os12g0101800 // Os03g0183200 // Os09g0287000 // Os05g0322900 // Os09g0457900 // Os11g0102200 // Os05g0343400 // Os01g0821600 // Os09g0522000 // Os07g0583600 // Os02g0764700 // Os09g0522100 // Os05g0497300 // Os04g0169100 // Os05g0178600 // Os03g0181100 // Os03g0402800 // Os05g0100500 // Os04g0637000 // Os05g0537100 // Os02g0677300…
GO:0031072	F	heat shock protein binding	7	134	35698	0.066	1	// Os04g0549600 // Os01g0606900 // Os01g0730500 // Os03g0648400 // Os11g0216100 // Os06g0650900 // Os01g0101700
GO:0015833	P	peptide transport	6	108	35698	0.068	1	// Os12g0231000 // Os10g0370700 // Os03g0138700 // Os12g0638200 // Os10g0469900 // Os10g0148400
GO:0006857	P	oligopeptide transport	6	108	35698	0.068	1	// Os12g0231000 // Os10g0370700 // Os03g0138700 // Os12g0638200 // Os10g0469900 // Os10g0148400
GO:1901657	P	glycosyl compound metabolic process	14	342	35698	0.068	1	// Os05g0402700 // Os07g0695800 // Os02g0613900 // Os06g0568200 // Os08g0120600 // Os09g0442600 // Os02g0176700 // Os02g0739600 // Os08g0434300 // Os03g0278900 // Os01g0905800 // Os12g0145700 // Os04g0677500 // Os07g0134800
GO:0016757	F	transferase activity, transferring glycosyl groups	26	730	35698	0.069	1	// Os09g0518000 // Os02g0802700 // Os01g0734600 // Os04g0624600 // Os01g0735300 // Os04g0320700 // Os10g0555100 // Os06g0289900 // Os01g0911200 // Os08g0237000 // Os01g0858900 // Os07g0687900 // Os05g0391600 // Os03g0316200 // Os07g0424400 // Os06g0697000 // Os03g0184300 // Os02g0594900 // Os04g0556400 // Os02g0589400 // Os04g0556500 // Os02g0613900 // Os05g0177500 // Os04g0429600 // Os06g0288300…
GO:1901565	P	organonitrogen compound catabolic process	10	222	35698	0.07	1	// Os05g0427400 // Os02g0626100 // Os11g0592000 // Os11g0592100 // Os04g0518400 // Os02g0627100 // Os04g0493400 // Os02g0581400 // Os11g0592200 // Os10g0550900
GO:0009308	P	amine metabolic process	6	110	35698	0.073	1	// Os03g0710800 // Os08g0320400 // Os04g0476100 // Os01g0588900 // Os04g0498600 // Os03g0264400
GO:0006518	P	peptide metabolic process	25	704	35698	0.075	1	// Os05g0243200 // Os07g0112800 // Os03g0177500 // Os01g0896700 // Os06g0647100 // Os03g0425000 // Os02g0822600 // Os11g0544800 // Os03g0196800 // Os04g0691600 // Os01g0662300 // Os09g0556500 // Os03g0769100 // Os01g0794500 // Os03g0815400 // Os01g0178500 // Os07g0173700 // Os03g0843400 // Os12g0541500 // Os01g0633000 // Os01g0678600 // Os05g0101400 // Os03g0219900 // Os01g0896800 // Os05g0541900
GO:0072521	P	purine-containing compound metabolic process	14	348	35698	0.076	1	// Os05g0402700 // Os07g0695800 // Os02g0613900 // Os06g0568200 // Os08g0120600 // Os09g0442600 // Os02g0176700 // Os02g0739600 // Os08g0434300 // Os03g0278900 // Os01g0905800 // Os12g0145700 // Os04g0677500 // Os07g0134800
GO:0009119	P	ribonucleoside metabolic process	13	319	35698	0.079	1	// Os05g0402700 // Os07g0695800 // Os06g0568200 // Os08g0120600 // Os09g0442600 // Os02g0176700 // Os02g0739600 // Os08g0434300 // Os03g0278900 // Os01g0905800 // Os12g0145700 // Os04g0677500 // Os07g0134800
GO:0042886	P	amide transport	6	114	35698	0.083	1	// Os12g0231000 // Os10g0370700 // Os03g0138700 // Os12g0638200 // Os10g0469900 // Os10g0148400
GO:0043603	P	cellular amide metabolic process	25	716	35698	0.087	1	// Os05g0243200 // Os07g0112800 // Os03g0177500 // Os01g0896700 // Os06g0647100 // Os03g0425000 // Os02g0822600 // Os11g0544800 // Os03g0196800 // Os04g0691600 // Os01g0662300 // Os09g0556500 // Os03g0769100 // Os01g0794500 // Os03g0815400 // Os01g0178500 // Os07g0173700 // Os03g0843400 // Os12g0541500 // Os01g0633000 // Os01g0678600 // Os05g0101400 // Os03g0219900 // Os01g0896800 // Os05g0541900
GO:1901135	P	carbohydrate derivative metabolic process	22	616	35698	0.087	1	// Os02g0802700 // Os12g0145700 // Os05g0402700 // Os07g0695800 // Os01g0905800 // Os04g0493400 // Os01g0858900 // Os11g0592200 // Os07g0134800 // Os06g0568200 // Os09g0442600 // Os02g0176700 // Os02g0594900 // Os08g0434300 // Os03g0278900 // Os01g0911200 // Os11g0592000 // Os02g0613900 // Os11g0592100 // Os02g0739600 // Os04g0677500 // Os08g0120600
GO:0019693	P	ribose phosphate metabolic process	13	326	35698	0.089	1	// Os05g0402700 // Os07g0695800 // Os06g0568200 // Os08g0120600 // Os09g0442600 // Os02g0176700 // Os02g0739600 // Os08g0434300 // Os03g0278900 // Os01g0905800 // Os12g0145700 // Os04g0677500 // Os07g0134800
GO:0044036	P	cell wall macromolecule metabolic process	5	90	35698	0.092	1	// Os11g0592100 // Os11g0592000 // Os10g0524300 // Os04g0493400 // Os11g0592200
GO:1901607	P	alpha-amino acid biosynthetic process	7	146	35698	0.092	1	// Os04g0650800 // Os08g0447000 // Os03g0264400 // Os03g0291500 // Os06g0149900 // Os03g0157900 // Os10g0550900
GO:0019219	P	regulation of nucleobase-containing compound metabolic process	53	1694	35698	0.093	1	// Os11g0143300 // Os03g0180900 // Os04g0610400 // Os02g0655200 // Os12g0101800 // Os03g0183200 // Os09g0287000 // Os05g0322900 // Os09g0457900 // Os11g0102200 // Os05g0343400 // Os01g0821600 // Os09g0522000 // Os07g0583600 // Os02g0764700 // Os09g0522100 // Os05g0497300 // Os04g0169100 // Os05g0178600 // Os03g0181100 // Os03g0402800 // Os05g0100500 // Os04g0637000 // Os05g0537100 // Os02g0677300…
GO:0006979	P	response to oxidative stress	16	438	35698	0.11	1	// Os04g0688100 // Os07g0677100 // Os02g0115700 // Os06g0727200 // Os10g0109300 // Os01g0963000 // Os12g0448900 // Os04g0688300 // Os03g0235000 // Os06g0547400 // Os07g0563400 // Os10g0109600 // Os02g0240300 // Os07g0677200 // Os02g0236800 // Os07g0677500
GO:0008299	P	isoprenoid biosynthetic process	5	97	35698	0.11	1	// Os11g0572700 // Os04g0178300 // Os07g0190000 // Os04g0178400 // Os02g0571100
GO:0030001	P	metal ion transport	12	307	35698	0.11	1	// Os04g0667600 // Os04g0468600 // Os07g0102100 // Os02g0176700 // Os11g0648000 // Os03g0152000 // Os09g0563200 // Os02g0584800 // Os06g0270200 // Os04g0401000 // Os04g0578600 // Os04g0469000
GO:0044282	P	small molecule catabolic process	7	157	35698	0.12	1	// Os05g0427400 // Os02g0626100 // Os04g0518400 // Os02g0627100 // Os02g0581400 // Os10g0550900 // Os02g0274100
GO:0015979	P	photosynthesis	10	249	35698	0.12	1	// Os09g0346500 // Os12g0207600 // Os01g0720500 // Os01g0869800 // Os07g0147500 // Os05g0560000 // Os07g0147900 // Os01g0600900 // Os12g0274700 // Os04g0457000
GO:0060089	F	molecular transducer activity	8	189	35698	0.13	1	// Os08g0174700 // Os03g0772600 // Os02g0154200 // Os06g0493600 // Os04g0169100 // Os12g0101800 // Os11g0102200 // Os02g0228300
GO:0051213	F	dioxygenase activity	8	190	35698	0.13	1	// Os02g0771600 // Os08g0508800 // Os02g0194700 // Os05g0127500 // Os08g0560000 // Os04g0447100 // Os03g0803500 // Os08g0509100
GO:0000160	P	phosphorelay signal transduction system	5	105	35698	0.14	1	// Os12g0139400 // Os11g0102200 // Os04g0169100 // Os12g0101800 // Os11g0143300
GO:0016798	F	hydrolase activity, acting on glycosyl bonds	19	557	35698	0.14	1	// Os11g0592000 // Os04g0409200 // Os05g0375400 // Os11g0592100 // Os01g0940800 // Os04g0474300 // Os07g0543300 // Os01g0940700 // Os06g0697000 // Os08g0237000 // Os01g0944700 // Os04g0493400 // Os10g0465700 // Os11g0592200 // Os06g0573600 // Os06g0356800 // Os03g0141200 // Os10g0492900 // Os01g0713200
GO:0008135	F	translation factor activity, RNA binding	5	105	35698	0.14	1	// Os05g0311500 // Os03g0177500 // Os01g0794500 // Os12g0541500 // Os07g0112800
GO:0050662	F	coenzyme binding	15	419	35698	0.14	1	// Os11g0572700 // Os08g0126300 // Os07g0695800 // Os08g0162800 // Os08g0557600 // Os04g0650800 // Os07g0564500 // Os08g0447000 // Os02g0274100 // Os07g0147900 // Os04g0578600 // Os02g0601300 // Os07g0134800 // Os08g0114300 // Os02g0581400
GO:0010556	P	regulation of macromolecule biosynthetic process	53	1766	35698	0.15	1	// Os11g0143300 // Os03g0180900 // Os04g0610400 // Os02g0655200 // Os12g0101800 // Os03g0183200 // Os09g0287000 // Os05g0322900 // Os09g0457900 // Os11g0102200 // Os05g0343400 // Os01g0821600 // Os09g0522000 // Os07g0583600 // Os02g0764700 // Os09g0522100 // Os05g0497300 // Os04g0169100 // Os05g0178600 // Os03g0181100 // Os03g0402800 // Os05g0100500 // Os04g0637000 // Os05g0537100 // Os02g0677300…
GO:2000112	P	regulation of cellular macromolecule biosynthetic process	53	1766	35698	0.15	1	// Os11g0143300 // Os03g0180900 // Os04g0610400 // Os02g0655200 // Os12g0101800 // Os03g0183200 // Os09g0287000 // Os05g0322900 // Os09g0457900 // Os11g0102200 // Os05g0343400 // Os01g0821600 // Os09g0522000 // Os07g0583600 // Os02g0764700 // Os09g0522100 // Os05g0497300 // Os04g0169100 // Os05g0178600 // Os03g0181100 // Os03g0402800 // Os05g0100500 // Os04g0637000 // Os05g0537100 // Os02g0677300…
GO:0044712	P	single-organism catabolic process	15	438	35698	0.17	1	// Os05g0427400 // Os05g0402700 // Os07g0695800 // Os02g0626100 // Os01g0905800 // Os04g0518400 // Os02g0739600 // Os02g0627100 // Os08g0434300 // Os02g0274100 // Os12g0145700 // Os04g0677500 // Os10g0550900 // Os08g0120600 // Os02g0581400
GO:0097659	P	nucleic acid-templated transcription	53	1784	35698	0.17	1	// Os11g0143300 // Os03g0180900 // Os04g0610400 // Os02g0655200 // Os12g0101800 // Os03g0183200 // Os09g0287000 // Os05g0322900 // Os09g0457900 // Os11g0102200 // Os05g0343400 // Os01g0821600 // Os09g0522000 // Os07g0583600 // Os02g0764700 // Os09g0522100 // Os05g0497300 // Os04g0169100 // Os05g0178600 // Os03g0181100 // Os03g0402800 // Os05g0100500 // Os04g0637000 // Os05g0537100 // Os02g0677300…
GO:0006351	P	transcription, DNA-templated	53	1784	35698	0.17	1	// Os11g0143300 // Os03g0180900 // Os04g0610400 // Os02g0655200 // Os12g0101800 // Os03g0183200 // Os09g0287000 // Os05g0322900 // Os09g0457900 // Os11g0102200 // Os05g0343400 // Os01g0821600 // Os09g0522000 // Os07g0583600 // Os02g0764700 // Os09g0522100 // Os05g0497300 // Os04g0169100 // Os05g0178600 // Os03g0181100 // Os03g0402800 // Os05g0100500 // Os04g0637000 // Os05g0537100 // Os02g0677300…
GO:0032774	P	RNA biosynthetic process	53	1786	35698	0.17	1	// Os11g0143300 // Os03g0180900 // Os04g0610400 // Os02g0655200 // Os12g0101800 // Os03g0183200 // Os09g0287000 // Os05g0322900 // Os09g0457900 // Os11g0102200 // Os05g0343400 // Os01g0821600 // Os09g0522000 // Os07g0583600 // Os02g0764700 // Os09g0522100 // Os05g0497300 // Os04g0169100 // Os05g0178600 // Os03g0181100 // Os03g0402800 // Os05g0100500 // Os04g0637000 // Os05g0537100 // Os02g0677300…
GO:0050660	F	flavin adenine dinucleotide binding	7	172	35698	0.17	1	// Os11g0572700 // Os08g0557600 // Os07g0564500 // Os07g0147900 // Os04g0578600 // Os07g0134800 // Os08g0114300
GO:0006812	P	cation transport	16	474	35698	0.18	1	// Os04g0667600 // Os05g0113300 // Os04g0468600 // Os06g0568200 // Os07g0102100 // Os04g0607500 // Os02g0176700 // Os11g0648000 // Os03g0152000 // Os09g0563200 // Os02g0584800 // Os03g0278900 // Os06g0270200 // Os04g0401000 // Os04g0578600 // Os04g0469000
GO:0043565	F	sequence-specific DNA binding	16	474	35698	0.18	1	// Os09g0417600 // Os02g0527300 // Os04g0637000 // Os09g0474000 // Os07g0619600 // Os02g0203000 // Os09g0334500 // Os11g0615800 // Os09g0417800 // Os05g0537100 // Os02g0181300 // Os07g0680400 // Os05g0322900 // Os04g0605100 // Os05g0343400 // Os01g0821600
GO:0031326	P	regulation of cellular biosynthetic process	53	1804	35698	0.19	1	// Os11g0143300 // Os03g0180900 // Os04g0610400 // Os02g0655200 // Os12g0101800 // Os03g0183200 // Os09g0287000 // Os05g0322900 // Os09g0457900 // Os11g0102200 // Os05g0343400 // Os01g0821600 // Os09g0522000 // Os07g0583600 // Os02g0764700 // Os09g0522100 // Os05g0497300 // Os04g0169100 // Os05g0178600 // Os03g0181100 // Os03g0402800 // Os05g0100500 // Os04g0637000 // Os05g0537100 // Os02g0677300…
GO:0016835	F	carbon-oxygen lyase activity	7	181	35698	0.2	1	// Os06g0149900 // Os11g0474800 // Os02g0571800 // Os02g0274100 // Os02g0570400 // Os09g0539100 // Os02g0581400
GO:0009889	P	regulation of biosynthetic process	53	1821	35698	0.21	1	// Os11g0143300 // Os03g0180900 // Os04g0610400 // Os02g0655200 // Os12g0101800 // Os03g0183200 // Os09g0287000 // Os05g0322900 // Os09g0457900 // Os11g0102200 // Os05g0343400 // Os01g0821600 // Os09g0522000 // Os07g0583600 // Os02g0764700 // Os09g0522100 // Os05g0497300 // Os04g0169100 // Os05g0178600 // Os03g0181100 // Os03g0402800 // Os05g0100500 // Os04g0637000 // Os05g0537100 // Os02g0677300…
GO:0006732	P	coenzyme metabolic process	9	250	35698	0.21	1	// Os05g0402700 // Os07g0695800 // Os02g0739600 // Os08g0434300 // Os01g0905800 // Os12g0145700 // Os04g0677500 // Os08g0120600 // Os02g0581400
GO:0008219	P	cell death	7	185	35698	0.21	1	// Os11g0588600 // Os12g0516300 // Os03g0129100 // Os11g0588400 // Os09g0517200 // Os11g0633500 // Os11g0605100
GO:0051171	P	regulation of nitrogen compound metabolic process	53	1824	35698	0.21	1	// Os11g0143300 // Os03g0180900 // Os04g0610400 // Os02g0655200 // Os12g0101800 // Os03g0183200 // Os09g0287000 // Os05g0322900 // Os09g0457900 // Os11g0102200 // Os05g0343400 // Os01g0821600 // Os09g0522000 // Os07g0583600 // Os02g0764700 // Os09g0522100 // Os05g0497300 // Os04g0169100 // Os05g0178600 // Os03g0181100 // Os03g0402800 // Os05g0100500 // Os04g0637000 // Os05g0537100 // Os02g0677300…
GO:0012501	P	programmed cell death	6	154	35698	0.22	1	// Os11g0588600 // Os12g0516300 // Os11g0588400 // Os09g0517200 // Os11g0633500 // Os11g0605100
GO:1990904	C	ribonucleoprotein complex	19	599	35698	0.22	1	// Os03g0856500 // Os01g0678600 // Os05g0101400 // Os01g0662300 // Os03g0769100 // Os05g0243200 // Os03g0425000 // Os02g0822600 // Os03g0815400 // Os01g0896800 // Os07g0173700 // Os06g0647100 // Os03g0843400 // Os03g0219900 // Os01g0896700 // Os03g0196800 // Os04g0691600 // Os01g0633000 // Os05g0541900
GO:0030529	C	intracellular ribonucleoprotein complex	19	599	35698	0.22	1	// Os03g0856500 // Os01g0678600 // Os05g0101400 // Os01g0662300 // Os03g0769100 // Os05g0243200 // Os03g0425000 // Os02g0822600 // Os03g0815400 // Os01g0896800 // Os07g0173700 // Os06g0647100 // Os03g0843400 // Os03g0219900 // Os01g0896700 // Os03g0196800 // Os04g0691600 // Os01g0633000 // Os05g0541900
GO:0010468	P	regulation of gene expression	53	1844	35698	0.23	1	// Os11g0143300 // Os03g0180900 // Os04g0610400 // Os02g0655200 // Os12g0101800 // Os03g0183200 // Os09g0287000 // Os05g0322900 // Os09g0457900 // Os11g0102200 // Os05g0343400 // Os01g0821600 // Os09g0522000 // Os07g0583600 // Os02g0764700 // Os09g0522100 // Os05g0497300 // Os04g0169100 // Os05g0178600 // Os03g0181100 // Os03g0402800 // Os05g0100500 // Os04g0637000 // Os05g0537100 // Os02g0677300…
GO:0008289	F	lipid binding	9	258	35698	0.23	1	// Os11g0116000 // Os06g0552900 // Os12g0115500 // Os01g0841700 // Os11g0116200 // Os11g0115400 // Os12g0115100 // Os05g0382600 // Os12g0115300
GO:0016758	F	transferase activity, transferring hexosyl groups	18	571	35698	0.23	1	// Os09g0518000 // Os02g0802700 // Os01g0734600 // Os07g0424400 // Os04g0320700 // Os02g0589400 // Os05g0177500 // Os04g0556400 // Os06g0697000 // Os04g0429600 // Os04g0624600 // Os02g0594900 // Os08g0237000 // Os01g0735300 // Os06g0289900 // Os06g0288300 // Os01g0911200 // Os04g0556500
GO:0016021	C	integral component of membrane	41	1404	35698	0.23	1	// Os04g0565500 // Os03g0129100 // Os05g0502000 // Os07g0582400 // Os01g0597600 // Os01g0290800 // Os06g0229000 // Os01g0609300 // Os04g0429600 // Os02g0301100 // Os09g0557800 // Os09g0525900 // Os01g0239200 // Os03g0170900 // Os06g0228200 // Os01g0723800 // Os01g0151200 // Os07g0559700 // Os06g0493600 // Os01g0858900 // Os07g0424400 // Os01g0825800 // Os01g0975900 // Os02g0176700 // Os11g0648000…
GO:0044711	P	single-organism biosynthetic process	37	1259	35698	0.24	1	// Os02g0802700 // Os12g0207600 // Os04g0447100 // Os04g0624600 // Os03g0192700 // Os12g0274700 // Os11g0659500 // Os04g0650800 // Os07g0424400 // Os02g0571100 // Os10g0100700 // Os01g0529800 // Os03g0157900 // Os08g0509100 // Os03g0710800 // Os03g0735000 // Os06g0568200 // Os04g0178300 // Os02g0176700 // Os07g0529600 // Os02g0187800 // Os03g0278900 // Os03g0291500 // Os04g0178400 // Os08g0508800…
GO:0044283	P	small molecule biosynthetic process	18	574	35698	0.24	1	// Os11g0659500 // Os06g0149900 // Os04g0650800 // Os01g0529800 // Os10g0100700 // Os04g0447100 // Os07g0529600 // Os02g0731900 // Os08g0447000 // Os03g0264400 // Os03g0291500 // Os03g0192700 // Os08g0508800 // Os03g0157900 // Os10g0550900 // Os09g0539100 // Os08g0509100 // Os02g0581400
GO:0009117	P	nucleotide metabolic process	13	400	35698	0.24	1	// Os05g0402700 // Os07g0695800 // Os06g0568200 // Os08g0120600 // Os09g0442600 // Os02g0176700 // Os02g0739600 // Os08g0434300 // Os03g0278900 // Os01g0905800 // Os12g0145700 // Os04g0677500 // Os07g0134800
GO:0008168	F	methyltransferase activity	11	333	35698	0.25	1	// Os04g0196200 // Os08g0498400 // Os05g0211100 // Os05g0548900 // Os03g0843800 // Os01g0631200 // Os02g0122900 // Os05g0105000 // Os07g0179300 // Os08g0157500 // Os08g0498100
GO:0016051	P	carbohydrate biosynthetic process	8	232	35698	0.26	1	// Os03g0735000 // Os12g0207600 // Os07g0424400 // Os08g0445700 // Os04g0429600 // Os04g0624600 // Os03g0192700 // Os12g0274700
GO:0006753	P	nucleoside phosphate metabolic process	13	405	35698	0.26	1	// Os05g0402700 // Os07g0695800 // Os06g0568200 // Os08g0120600 // Os09g0442600 // Os02g0176700 // Os02g0739600 // Os08g0434300 // Os03g0278900 // Os01g0905800 // Os12g0145700 // Os04g0677500 // Os07g0134800
GO:0004252	F	serine-type endopeptidase activity	5	136	35698	0.28	1	// Os03g0119300 // Os10g0524600 // Os04g0561500 // Os07g0622000 // Os04g0430700
GO:0080090	P	regulation of primary metabolic process	54	1929	35698	0.29	1	// Os11g0143300 // Os03g0180900 // Os04g0610400 // Os02g0655200 // Os12g0101800 // Os03g0183200 // Os09g0287000 // Os05g0322900 // Os09g0457900 // Os11g0102200 // Os05g0343400 // Os01g0821600 // Os09g0522000 // Os07g0583600 // Os02g0764700 // Os09g0522100 // Os05g0497300 // Os04g0169100 // Os05g0557700 // Os05g0178600 // Os03g0181100 // Os03g0402800 // Os05g0100500 // Os04g0637000 // Os05g0537100…
GO:0016741	F	transferase activity, transferring one-carbon groups	11	346	35698	0.29	1	// Os04g0196200 // Os08g0498400 // Os05g0211100 // Os05g0548900 // Os03g0843800 // Os01g0631200 // Os02g0122900 // Os05g0105000 // Os07g0179300 // Os08g0157500 // Os08g0498100
GO:0005634	C	nucleus	75	2719	35698	0.29	1	// Os02g0673500 // Os01g0108400 // Os04g0610400 // Os03g0180900 // Os12g0567300 // Os04g0684900 // Os08g0215200 // Os04g0517100 // Os01g0863300 // Os06g0348800 // Os03g0183200 // Os09g0287000 // Os05g0322900 // Os09g0457900 // Os02g0741500 // Os05g0343400 // Os01g0821600 // Os04g0301500 // Os09g0522000 // Os02g0205300 // Os07g0583600 // Os02g0764700 // Os09g0522100 // Os05g0497300 // Os05g0178600…
GO:0055086	P	nucleobase-containing small molecule metabolic process	14	456	35698	0.3	1	// Os05g0402700 // Os07g0695800 // Os02g0613900 // Os06g0568200 // Os08g0120600 // Os09g0442600 // Os02g0176700 // Os02g0739600 // Os08g0434300 // Os03g0278900 // Os01g0905800 // Os12g0145700 // Os04g0677500 // Os07g0134800
GO:0010467	P	gene expression	79	2898	35698	0.32	1	// Os01g0633000 // Os03g0815400 // Os11g0143300 // Os03g0180900 // Os05g0243200 // Os04g0610400 // Os03g0196800 // Os02g0655200 // Os03g0177500 // Os11g0572700 // Os07g0112800 // Os12g0101800 // Os03g0183200 // Os09g0287000 // Os11g0102200 // Os09g0457900 // Os05g0322900 // Os05g0343400 // Os01g0821600 // Os09g0522000 // Os06g0647100 // Os07g0583600 // Os02g0764700 // Os09g0522100 // Os03g0425000…
GO:0005976	P	polysaccharide metabolic process	9	286	35698	0.33	1	// Os03g0735000 // Os07g0424400 // Os07g0543300 // Os06g0697000 // Os04g0429600 // Os04g0624600 // Os03g0141200 // Os08g0237000 // Os10g0465700
GO:0035639	F	purine ribonucleoside triphosphate binding	89	3279	35698	0.33	1	// Os02g0126400 // Os01g0290800 // Os06g0229000 // Os11g0102200 // Os02g0157700 // Os04g0169100 // Os08g0487800 // Os03g0285800 // Os01g0127700 // Os12g0101800 // Os06g0288100 // Os08g0384500 // Os07g0574800 // Os02g0787300 // Os09g0418000 // Os06g0663200 // Os07g0622000 // Os11g0670900 // Os02g0154200 // Os05g0427100 // Os11g0416900 // Os09g0474300 // Os06g0340200 // Os10g0180800 // Os09g0442100…
GO:0060255	P	regulation of macromolecule metabolic process	54	1968	35698	0.34	1	// Os11g0143300 // Os03g0180900 // Os04g0610400 // Os02g0655200 // Os12g0101800 // Os03g0183200 // Os09g0287000 // Os05g0322900 // Os09g0457900 // Os11g0102200 // Os05g0343400 // Os01g0821600 // Os09g0522000 // Os07g0583600 // Os02g0764700 // Os09g0522100 // Os05g0497300 // Os04g0169100 // Os05g0557700 // Os05g0178600 // Os03g0181100 // Os03g0402800 // Os05g0100500 // Os04g0637000 // Os05g0537100…
GO:0019684	P	photosynthesis, light reaction	5	148	35698	0.34	1	// Os09g0346500 // Os01g0600900 // Os01g0869800 // Os01g0720500 // Os04g0457000
GO:1902494	C	catalytic complex	15	507	35698	0.34	1	// Os07g0147500 // Os05g0476700 // Os01g0800500 // Os04g0418500 // Os02g0488600 // Os08g0307400 // Os02g0540700 // Os03g0761100 // Os03g0292100 // Os12g0291100 // Os02g0539200 // Os12g0291400 // Os07g0134800 // Os01g0911200 // Os10g0356000
GO:0016053	P	organic acid biosynthetic process	14	477	35698	0.35	1	// Os11g0659500 // Os06g0149900 // Os04g0650800 // Os01g0529800 // Os02g0731900 // Os08g0447000 // Os03g0264400 // Os03g0291500 // Os04g0447100 // Os08g0508800 // Os03g0157900 // Os10g0550900 // Os09g0539100 // Os08g0509100
GO:0051179	P	localization	65	2392	35698	0.35	1	// Os04g0667600 // Os12g0231000 // Os05g0550300 // Os11g0116000 // Os04g0607500 // Os06g0228200 // Os12g0115100 // Os05g0502000 // Os07g0582400 // Os11g0115400 // Os01g0290800 // Os03g0103300 // Os01g0151200 // Os12g0115300 // Os02g0741500 // Os05g0473500 // Os01g0609300 // Os10g0370700 // Os06g0568200 // Os01g0949500 // Os12g0638200 // Os09g0563200 // Os07g0102100 // Os01g0239200 // Os05g0231700…
GO:0017171	F	serine hydrolase activity	7	220	35698	0.35	1	// Os03g0119300 // Os04g0561500 // Os10g0524600 // Os06g0647400 // Os10g0101200 // Os07g0622000 // Os04g0430700
GO:0016887	F	ATPase activity	13	437	35698	0.35	1	// Os02g0318500 // Os04g0209300 // Os06g0568200 // Os08g0398000 // Os02g0176700 // Os11g0615800 // Os11g0416900 // Os03g0108600 // Os01g0723800 // Os01g0290800 // Os08g0384500 // Os02g0739000 // Os01g0609300
GO:0008236	F	serine-type peptidase activity	7	220	35698	0.35	1	// Os03g0119300 // Os04g0561500 // Os10g0524600 // Os06g0647400 // Os10g0101200 // Os07g0622000 // Os04g0430700
GO:0005524	F	ATP binding	82	3048	35698	0.36	1	// Os01g0723800 // Os02g0526400 // Os05g0522600 // Os03g0772600 // Os06g0142500 // Os08g0174700 // Os09g0442100 // Os02g0697400 // Os02g0739000 // Os12g0514500 // Os02g0126400 // Os07g0150700 // Os09g0556500 // Os01g0310500 // Os01g0292200 // Os11g0588400 // Os03g0859700 // Os11g0605100 // Os11g0102200 // Os08g0398000 // Os03g0101700 // Os01g0609300 // Os05g0566400 // Os02g0205300 // Os11g0588600…
GO:0004871	F	signal transducer activity	7	223	35698	0.36	1	// Os05g0566400 // Os11g0143300 // Os12g0139400 // Os04g0169100 // Os03g0285800 // Os12g0101800 // Os11g0102200
GO:0015077	F	monovalent inorganic cation transmembrane transporter activity	7	225	35698	0.37	1	// Os05g0113300 // Os06g0568200 // Os07g0102100 // Os11g0648000 // Os09g0563200 // Os03g0278900 // Os06g0270200
GO:0034637	P	cellular carbohydrate biosynthetic process	6	193	35698	0.38	1	// Os03g0735000 // Os07g0424400 // Os08g0445700 // Os04g0429600 // Os04g0624600 // Os03g0192700
GO:1901575	P	organic substance catabolic process	24	863	35698	0.39	1	// Os04g0518400 // Os12g0145700 // Os05g0402700 // Os07g0695800 // Os02g0627100 // Os01g0905800 // Os04g0493400 // Os11g0592200 // Os05g0427400 // Os10g0550900 // Os08g0434300 // Os02g0274100 // Os02g0205300 // Os03g0141200 // Os11g0592000 // Os06g0264300 // Os02g0626100 // Os11g0592100 // Os07g0543300 // Os02g0739600 // Os04g0677500 // Os08g0120600 // Os10g0465700 // Os02g0581400
GO:0031224	C	intrinsic component of membrane	41	1515	35698	0.4	1	// Os04g0565500 // Os03g0129100 // Os05g0502000 // Os07g0582400 // Os01g0597600 // Os01g0290800 // Os06g0229000 // Os01g0609300 // Os04g0429600 // Os02g0301100 // Os09g0557800 // Os09g0525900 // Os01g0239200 // Os03g0170900 // Os06g0228200 // Os01g0723800 // Os01g0151200 // Os07g0559700 // Os06g0493600 // Os01g0858900 // Os07g0424400 // Os01g0825800 // Os01g0975900 // Os02g0176700 // Os11g0648000…
GO:0031323	P	regulation of cellular metabolic process	53	1979	35698	0.41	1	// Os11g0143300 // Os03g0180900 // Os04g0610400 // Os02g0655200 // Os12g0101800 // Os03g0183200 // Os09g0287000 // Os05g0322900 // Os09g0457900 // Os11g0102200 // Os05g0343400 // Os01g0821600 // Os09g0522000 // Os07g0583600 // Os02g0764700 // Os09g0522100 // Os05g0497300 // Os04g0169100 // Os05g0178600 // Os03g0181100 // Os03g0402800 // Os05g0100500 // Os04g0637000 // Os05g0537100 // Os02g0677300…
GO:0032561	F	guanyl ribonucleotide binding	7	235	35698	0.41	1	// Os01g0805900 // Os02g0157700 // Os07g0669200 // Os06g0671900 // Os07g0574800 // Os03g0177500 // Os03g0835100
GO:0005525	F	GTP binding	7	235	35698	0.41	1	// Os01g0805900 // Os02g0157700 // Os07g0669200 // Os06g0671900 // Os07g0574800 // Os03g0177500 // Os03g0835100
GO:0032787	P	monocarboxylic acid metabolic process	12	426	35698	0.42	1	// Os11g0659500 // Os05g0402700 // Os07g0695800 // Os01g0529800 // Os02g0739600 // Os02g0731900 // Os08g0434300 // Os02g0274100 // Os12g0145700 // Os04g0677500 // Os01g0905800 // Os08g0120600
GO:0051234	P	establishment of localization	62	2331	35698	0.42	1	// Os04g0667600 // Os12g0231000 // Os11g0116000 // Os04g0607500 // Os06g0228200 // Os12g0115100 // Os05g0502000 // Os07g0582400 // Os11g0115400 // Os01g0290800 // Os03g0103300 // Os01g0151200 // Os12g0115300 // Os02g0741500 // Os05g0473500 // Os01g0609300 // Os10g0370700 // Os06g0568200 // Os05g0550300 // Os12g0638200 // Os09g0563200 // Os07g0102100 // Os01g0239200 // Os05g0231700 // Os04g0469000…
GO:0019001	F	guanyl nucleotide binding	7	237	35698	0.42	1	// Os01g0805900 // Os02g0157700 // Os07g0669200 // Os06g0671900 // Os07g0574800 // Os03g0177500 // Os03g0835100
GO:0016616	F	oxidoreductase activity, acting on the CH-OH group of donors, NAD or NADP as acceptor	6	201	35698	0.42	1	// Os02g0187800 // Os04g0650800 // Os04g0497000 // Os08g0447000 // Os08g0434300 // Os02g0274100
GO:0015672	P	monovalent inorganic cation transport	6	202	35698	0.43	1	// Os06g0568200 // Os07g0102100 // Os11g0648000 // Os09g0563200 // Os03g0278900 // Os06g0270200
GO:0016310	P	phosphorylation	55	2065	35698	0.43	1	// Os08g0307400 // Os07g0678300 // Os08g0174700 // Os11g0209700 // Os02g0126400 // Os07g0150700 // Os01g0292200 // Os03g0772600 // Os12g0145700 // Os11g0102200 // Os11g0607900 // Os04g0598900 // Os05g0566400 // Os05g0402700 // Os07g0695800 // Os06g0202900 // Os05g0522600 // Os04g0169100 // Os09g0356200 // Os01g0905800 // Os03g0285800 // Os07g0438500 // Os02g0228300 // Os01g0127700 // Os07g0134800…
GO:0009056	P	catabolic process	25	924	35698	0.43	1	// Os10g0524300 // Os02g0627100 // Os12g0145700 // Os05g0402700 // Os07g0695800 // Os04g0518400 // Os01g0905800 // Os04g0493400 // Os11g0592200 // Os05g0427400 // Os10g0550900 // Os08g0434300 // Os02g0274100 // Os02g0205300 // Os03g0141200 // Os11g0592000 // Os06g0264300 // Os02g0626100 // Os11g0592100 // Os07g0543300 // Os02g0739600 // Os04g0677500 // Os08g0120600 // Os10g0465700 // Os02g0581400
GO:0003924	F	GTPase activity	5	165	35698	0.43	1	// Os03g0177500 // Os02g0157700 // Os06g0671900 // Os07g0574800 // Os01g0805900
GO:0016614	F	oxidoreductase activity, acting on CH-OH group of donors	7	241	35698	0.43	1	// Os02g0187800 // Os04g0650800 // Os04g0497000 // Os08g0447000 // Os08g0434300 // Os02g0274100 // Os08g0114300
GO:0019787	F	ubiquitin-like protein transferase activity	7	241	35698	0.43	1	// Os05g0476700 // Os04g0418500 // Os02g0488600 // Os02g0540700 // Os01g0148000 // Os05g0557700 // Os02g0539200
GO:0019637	P	organophosphate metabolic process	16	582	35698	0.44	1	// Os11g0209700 // Os05g0402700 // Os07g0695800 // Os06g0568200 // Os08g0120600 // Os09g0442600 // Os08g0307400 // Os02g0176700 // Os02g0739600 // Os08g0434300 // Os03g0278900 // Os01g0905800 // Os03g0192700 // Os12g0145700 // Os04g0677500 // Os07g0134800
GO:0006073	P	cellular glucan metabolic process	6	207	35698	0.45	1	// Os03g0735000 // Os07g0424400 // Os06g0697000 // Os04g0429600 // Os04g0624600 // Os08g0237000
GO:0006810	P	transport	61	2315	35698	0.45	1	// Os04g0667600 // Os12g0231000 // Os11g0116000 // Os04g0607500 // Os06g0228200 // Os12g0115100 // Os05g0502000 // Os07g0582400 // Os11g0115400 // Os01g0290800 // Os03g0103300 // Os02g0741500 // Os12g0115300 // Os05g0473500 // Os01g0609300 // Os10g0370700 // Os06g0568200 // Os05g0550300 // Os12g0638200 // Os09g0563200 // Os07g0102100 // Os01g0239200 // Os05g0231700 // Os04g0469000 // Os07g0134800…
GO:0044042	P	glucan metabolic process	6	207	35698	0.45	1	// Os03g0735000 // Os07g0424400 // Os06g0697000 // Os04g0429600 // Os04g0624600 // Os08g0237000
GO:0042626	F	ATPase activity, coupled to transmembrane movement of substances	5	172	35698	0.46	1	// Os01g0723800 // Os04g0209300 // Os02g0176700 // Os01g0290800 // Os06g0568200
GO:0043492	F	ATPase activity, coupled to movement of substances	5	172	35698	0.46	1	// Os01g0723800 // Os04g0209300 // Os02g0176700 // Os01g0290800 // Os06g0568200
GO:0000151	C	ubiquitin ligase complex	5	173	35698	0.46	1	// Os02g0539200 // Os02g0488600 // Os05g0476700 // Os02g0540700 // Os04g0418500
GO:0017111	F	nucleoside-triphosphatase activity	26	977	35698	0.47	1	// Os01g0723800 // Os02g0526400 // Os03g0151800 // Os03g0101700 // Os11g0615800 // Os01g0290800 // Os06g0229000 // Os03g0177500 // Os01g0609300 // Os02g0157700 // Os08g0384500 // Os02g0318500 // Os06g0568200 // Os06g0255200 // Os08g0398000 // Os02g0176700 // Os03g0802500 // Os07g0574800 // Os02g0739000 // Os03g0597200 // Os02g0205300 // Os01g0805900 // Os04g0209300 // Os11g0416900 // Os03g0108600…
GO:0051186	P	cofactor metabolic process	10	368	35698	0.48	1	// Os01g0631200 // Os05g0402700 // Os07g0695800 // Os02g0739600 // Os08g0434300 // Os01g0905800 // Os12g0145700 // Os04g0677500 // Os08g0120600 // Os02g0581400
GO:0016820	F	hydrolase activity, acting on acid anhydrides, catalyzing transmembrane movement of substances	5	176	35698	0.48	1	// Os01g0723800 // Os04g0209300 // Os02g0176700 // Os01g0290800 // Os06g0568200
GO:0044425	C	membrane part	50	1919	35698	0.49	1	// Os10g0521900 // Os04g0565500 // Os03g0129100 // Os05g0502000 // Os07g0582400 // Os01g0597600 // Os01g0290800 // Os06g0229000 // Os01g0609300 // Os04g0429600 // Os06g0568200 // Os02g0301100 // Os09g0557800 // Os07g0147500 // Os04g0169100 // Os09g0525900 // Os01g0239200 // Os03g0170900 // Os06g0228200 // Os07g0134800 // Os01g0723800 // Os01g0151200 // Os07g0559700 // Os06g0493600 // Os01g0858900…
GO:0008610	P	lipid biosynthetic process	10	378	35698	0.51	1	// Os11g0659500 // Os11g0572700 // Os07g0190000 // Os02g0571100 // Os04g0178300 // Os04g0178400 // Os02g0802700 // Os02g0731900 // Os01g0529800 // Os03g0192700
GO:0046873	F	metal ion transmembrane transporter activity	5	184	35698	0.52	1	// Os09g0563200 // Os07g0102100 // Os11g0648000 // Os02g0176700 // Os06g0270200
GO:0016874	F	ligase activity	10	381	35698	0.52	1	// Os05g0427400 // Os09g0556500 // Os11g0604700 // Os02g0626100 // Os04g0518400 // Os02g0627100 // Os03g0291500 // Os02g0697400 // Os11g0544800 // Os02g0177600
GO:0046394	P	carboxylic acid biosynthetic process	11	423	35698	0.53	1	// Os11g0659500 // Os08g0508800 // Os01g0529800 // Os02g0731900 // Os08g0447000 // Os03g0291500 // Os04g0447100 // Os04g0650800 // Os03g0157900 // Os10g0550900 // Os08g0509100
GO:0055114	P	oxidation-reduction process	45	1753	35698	0.54	1	// Os03g0189400 // Os08g0507100 // Os12g0207600 // Os07g0677100 // Os01g0760600 // Os04g0688300 // Os10g0109600 // Os04g0447100 // Os02g0240300 // Os10g0159800 // Os07g0677200 // Os03g0122300 // Os04g0688100 // Os11g0210300 // Os08g0508800 // Os04g0338100 // Os12g0274700 // Os08g0557600 // Os10g0430200 // Os07g0147900 // Os06g0547400 // Os03g0815200 // Os11g0210500 // Os07g0134800 // Os08g0509100…
GO:0016462	F	pyrophosphatase activity	26	1015	35698	0.54	1	// Os01g0723800 // Os02g0526400 // Os03g0151800 // Os03g0101700 // Os11g0615800 // Os01g0290800 // Os06g0229000 // Os03g0177500 // Os01g0609300 // Os02g0157700 // Os08g0384500 // Os02g0318500 // Os06g0568200 // Os06g0255200 // Os08g0398000 // Os02g0176700 // Os03g0802500 // Os07g0574800 // Os02g0739000 // Os03g0597200 // Os02g0205300 // Os01g0805900 // Os04g0209300 // Os11g0416900 // Os03g0108600…
GO:0019222	P	regulation of metabolic process	55	2169	35698	0.57	1	// Os11g0143300 // Os03g0180900 // Os04g0610400 // Os02g0655200 // Os12g0101800 // Os03g0183200 // Os09g0287000 // Os05g0322900 // Os09g0457900 // Os11g0102200 // Os05g0343400 // Os01g0821600 // Os09g0522000 // Os07g0583600 // Os02g0764700 // Os09g0522100 // Os05g0497300 // Os04g0169100 // Os05g0557700 // Os05g0178600 // Os03g0181100 // Os03g0402800 // Os05g0100500 // Os04g0637000 // Os05g0537100…
GO:0016567	P	protein ubiquitination	5	196	35698	0.57	1	// Os02g0539200 // Os02g0488600 // Os05g0476700 // Os02g0540700 // Os04g0418500
GO:0006811	P	ion transport	17	672	35698	0.57	1	// Os04g0667600 // Os05g0113300 // Os04g0468600 // Os06g0568200 // Os07g0102100 // Os04g0607500 // Os02g0176700 // Os11g0648000 // Os03g0152000 // Os05g0502000 // Os09g0563200 // Os02g0584800 // Os03g0278900 // Os06g0270200 // Os04g0401000 // Os04g0578600 // Os04g0469000
GO:0004842	F	ubiquitin-protein transferase activity	6	236	35698	0.57	1	// Os05g0476700 // Os02g0488600 // Os04g0418500 // Os02g0540700 // Os01g0148000 // Os02g0539200
GO:0016879	F	ligase activity, forming carbon-nitrogen bonds	6	237	35698	0.57	1	// Os05g0427400 // Os02g0626100 // Os02g0627100 // Os04g0518400 // Os03g0291500 // Os11g0544800
GO:0044264	P	cellular polysaccharide metabolic process	6	239	35698	0.58	1	// Os03g0735000 // Os07g0424400 // Os06g0697000 // Os04g0429600 // Os04g0624600 // Os08g0237000
GO:0016818	F	hydrolase activity, acting on acid anhydrides, in phosphorus-containing anhydrides	26	1032	35698	0.58	1	// Os01g0723800 // Os02g0526400 // Os03g0151800 // Os03g0101700 // Os11g0615800 // Os01g0290800 // Os06g0229000 // Os03g0177500 // Os01g0609300 // Os02g0157700 // Os08g0384500 // Os02g0318500 // Os06g0568200 // Os06g0255200 // Os08g0398000 // Os02g0176700 // Os03g0802500 // Os07g0574800 // Os02g0739000 // Os03g0597200 // Os02g0205300 // Os01g0805900 // Os04g0209300 // Os11g0416900 // Os03g0108600…
GO:0022890	F	inorganic cation transmembrane transporter activity	8	320	35698	0.58	1	// Os05g0113300 // Os06g0568200 // Os07g0102100 // Os11g0648000 // Os02g0176700 // Os09g0563200 // Os03g0278900 // Os06g0270200
GO:0005215	F	transporter activity	30	1191	35698	0.58	1	// Os12g0231000 // Os04g0607500 // Os06g0228200 // Os05g0502000 // Os07g0582400 // Os10g0469900 // Os01g0290800 // Os10g0370700 // Os12g0638200 // Os09g0563200 // Os07g0102100 // Os01g0239200 // Os05g0231700 // Os01g0723800 // Os07g0559700 // Os07g0155600 // Os06g0270200 // Os06g0568200 // Os01g0975900 // Os03g0170900 // Os11g0648000 // Os02g0176700 // Os02g0823100 // Os03g0278900 // Os12g0125500…
GO:0044763	P	single-organism cellular process	126	4961	35698	0.59	1	// Os08g0507100 // Os09g0347300 // Os07g0147900 // Os04g0624600 // Os04g0447100 // Os11g0102200 // Os05g0402700 // Os04g0650800 // Os08g0557600 // Os01g0949500 // Os04g0169100 // Os04g0518400 // Os01g0905800 // Os01g0858900 // Os07g0424400 // Os07g0529600 // Os02g0187800 // Os01g0905200 // Os01g0667900 // Os09g0418000 // Os10g0517500 // Os10g0550900 // Os07g0622000 // Os06g0501900 // Os08g0445700…
GO:0016817	F	hydrolase activity, acting on acid anhydrides	26	1046	35698	0.6	1	// Os01g0723800 // Os02g0526400 // Os03g0151800 // Os03g0101700 // Os11g0615800 // Os01g0290800 // Os06g0229000 // Os03g0177500 // Os01g0609300 // Os02g0157700 // Os08g0384500 // Os02g0318500 // Os06g0568200 // Os06g0255200 // Os08g0398000 // Os02g0176700 // Os03g0802500 // Os07g0574800 // Os02g0739000 // Os03g0597200 // Os02g0205300 // Os01g0805900 // Os04g0209300 // Os11g0416900 // Os03g0108600…
GO:0015405	F	P-P-bond-hydrolysis-driven transmembrane transporter activity	5	203	35698	0.6	1	// Os01g0723800 // Os04g0209300 // Os02g0176700 // Os01g0290800 // Os06g0568200
GO:0070647	P	protein modification by small protein conjugation or removal	6	246	35698	0.61	1	// Os05g0476700 // Os02g0488600 // Os04g0418500 // Os02g0540700 // Os05g0557700 // Os02g0539200
GO:0071705	P	nitrogen compound transport	6	247	35698	0.61	1	// Os12g0231000 // Os10g0370700 // Os03g0138700 // Os12g0638200 // Os10g0469900 // Os10g0148400
GO:0032446	P	protein modification by small protein conjugation	5	208	35698	0.62	1	// Os02g0539200 // Os02g0488600 // Os05g0476700 // Os02g0540700 // Os04g0418500
GO:1901137	P	carbohydrate derivative biosynthetic process	7	290	35698	0.62	1	// Os02g0802700 // Os06g0568200 // Os02g0176700 // Os02g0594900 // Os03g0278900 // Os01g0858900 // Os01g0911200
GO:0015399	F	primary active transmembrane transporter activity	5	209	35698	0.63	1	// Os01g0723800 // Os04g0209300 // Os02g0176700 // Os01g0290800 // Os06g0568200
GO:0042623	F	ATPase activity, coupled	8	335	35698	0.63	1	// Os01g0723800 // Os04g0209300 // Os06g0568200 // Os02g0176700 // Os11g0615800 // Os03g0108600 // Os01g0290800 // Os02g0739000
GO:0042742	P	defense response to bacterium	6	260	35698	0.66	1	// Os11g0592000 // Os03g0180900 // Os11g0592100 // Os09g0439200 // Os11g0592200 // Os03g0181100
GO:0035556	P	intracellular signal transduction	7	300	35698	0.66	1	// Os11g0143300 // Os12g0139400 // Os08g0307400 // Os04g0169100 // Os12g0101800 // Os11g0209700 // Os11g0102200
GO:0006950	P	response to stress	71	2869	35698	0.66	1	// Os07g0677100 // Os03g0300400 // Os06g0727200 // Os03g0180900 // Os03g0130300 // Os02g0115700 // Os01g0135900 // Os11g0615800 // Os12g0555000 // Os03g0655400 // Os02g0573200 // Os07g0563400 // Os10g0109600 // Os02g0240300 // Os11g0216100 // Os07g0677200 // Os06g0547400 // Os06g0661800 // Os01g0109000 // Os04g0688100 // Os09g0522000 // Os05g0402700 // Os08g0508800 // Os01g0149800 // Os04g0178400…
GO:0016192	P	vesicle-mediated transport	7	305	35698	0.67	1	// Os02g0437200 // Os09g0347300 // Os01g0905300 // Os01g0905200 // Os12g0104800 // Os06g0731800 // Os05g0473500
GO:0071702	P	organic substance transport	22	918	35698	0.67	1	// Os12g0231000 // Os11g0116000 // Os12g0115100 // Os10g0469900 // Os03g0103300 // Os02g0741500 // Os12g0115300 // Os03g0103200 // Os10g0370700 // Os05g0550300 // Os12g0638200 // Os02g0437200 // Os03g0170900 // Os12g0115500 // Os03g0138700 // Os11g0116200 // Os12g0104800 // Os03g0718800 // Os10g0505700 // Os11g0115400 // Os10g0148400 // Os06g0731800
GO:0043228	C	non-membrane-bounded organelle	29	1201	35698	0.67	1	// Os01g0949500 // Os05g0243200 // Os06g0281400 // Os01g0896700 // Os06g0647100 // Os08g0215200 // Os03g0425000 // Os02g0822600 // Os03g0799000 // Os03g0196800 // Os04g0691600 // Os05g0223000 // Os03g0769100 // Os01g0662300 // Os03g0815400 // Os01g0135700 // Os07g0574800 // Os03g0843400 // Os03g0856500 // Os01g0633000 // Os01g0805900 // Os01g0678600 // Os05g0101400 // Os07g0173700 // Os06g0671900…
GO:0044262	P	cellular carbohydrate metabolic process	8	354	35698	0.69	1	// Os03g0735000 // Os07g0424400 // Os08g0445700 // Os06g0697000 // Os04g0429600 // Os04g0624600 // Os08g0237000 // Os03g0192700
GO:0033036	P	macromolecule localization	16	688	35698	0.69	1	// Os03g0103200 // Os11g0116000 // Os02g0437200 // Os03g0718800 // Os06g0731800 // Os12g0115500 // Os05g0550300 // Os12g0115100 // Os11g0116200 // Os11g0115400 // Os12g0104800 // Os10g0505700 // Os03g0103300 // Os01g0151200 // Os12g0115300 // Os02g0741500
GO:0016020	C	membrane	143	5741	35698	0.69	1	// Os12g0231000 // Os04g0401700 // Os04g0565500 // Os01g0940800 // Os06g0493600 // Os12g0113500 // Os01g0597600 // Os01g0290800 // Os06g0229000 // Os01g0108000 // Os03g0125600 // Os09g0557800 // Os04g0169100 // Os07g0605400 // Os06g0251100 // Os01g0239200 // Os05g0231700 // Os09g0332700 // Os09g0346500 // Os03g0337500 // Os06g0270200 // Os07g0424400 // Os01g0825800 // Os12g0484600 // Os01g0833400…
GO:1990234	C	transferase complex	7	312	35698	0.69	1	// Os05g0476700 // Os04g0418500 // Os02g0488600 // Os08g0307400 // Os02g0540700 // Os02g0539200 // Os01g0911200
GO:0006796	P	phosphate-containing compound metabolic process	64	2628	35698	0.7	1	// Os08g0307400 // Os07g0678300 // Os08g0174700 // Os11g0209700 // Os02g0126400 // Os07g0150700 // Os01g0292200 // Os03g0772600 // Os03g0192700 // Os12g0145700 // Os11g0102200 // Os11g0607900 // Os12g0101800 // Os05g0566400 // Os05g0402700 // Os07g0695800 // Os06g0202900 // Os05g0522600 // Os04g0169100 // Os09g0356200 // Os01g0905800 // Os03g0285800 // Os07g0438500 // Os04g0598900 // Os02g0228300…
GO:0016773	F	phosphotransferase activity, alcohol group as acceptor	49	2031	35698	0.7	1	// Os08g0307400 // Os07g0678300 // Os08g0174700 // Os02g0126400 // Os07g0150700 // Os01g0292200 // Os03g0772600 // Os12g0145700 // Os11g0102200 // Os11g0607900 // Os04g0598900 // Os05g0566400 // Os06g0202900 // Os05g0522600 // Os04g0169100 // Os09g0356200 // Os03g0285800 // Os07g0438500 // Os02g0228300 // Os01g0127700 // Os02g0777800 // Os06g0142500 // Os10g0180800 // Os08g0203600 // Os12g0101800…
GO:0009617	P	response to bacterium	7	316	35698	0.71	1	// Os11g0592000 // Os03g0180900 // Os11g0592100 // Os09g0439200 // Os11g0592200 // Os03g0181100 // Os07g0661400
GO:0009607	P	response to biotic stimulus	15	652	35698	0.71	1	// Os03g0300400 // Os08g0508800 // Os02g0654700 // Os03g0180900 // Os11g0592000 // Os11g0592100 // Os02g0437200 // Os12g0555000 // Os09g0439200 // Os12g0555500 // Os04g0493400 // Os03g0181100 // Os11g0592200 // Os07g0661400 // Os12g0555200
GO:0044267	P	cellular protein metabolic process	87	3554	35698	0.71	1	// Os02g0126400 // Os07g0112800 // Os11g0102200 // Os03g0425000 // Os02g0822600 // Os04g0169100 // Os03g0285800 // Os01g0127700 // Os01g0858900 // Os02g0488600 // Os06g0288100 // Os07g0173700 // Os02g0787300 // Os09g0418000 // Os06g0663200 // Os07g0622000 // Os11g0670900 // Os06g0264300 // Os02g0154200 // Os05g0427100 // Os06g0340200 // Os03g0219900 // Os09g0556500 // Os09g0442100 // Os03g0177500…
GO:0016070	P	RNA metabolic process	56	2319	35698	0.71	1	// Os11g0143300 // Os03g0180900 // Os04g0610400 // Os02g0655200 // Os11g0572700 // Os12g0101800 // Os03g0183200 // Os09g0287000 // Os05g0322900 // Os09g0457900 // Os11g0102200 // Os05g0343400 // Os01g0821600 // Os09g0522000 // Os07g0583600 // Os02g0764700 // Os09g0522100 // Os05g0497300 // Os04g0169100 // Os05g0178600 // Os03g0181100 // Os03g0402800 // Os05g0100500 // Os04g0637000 // Os05g0537100…
GO:0006793	P	phosphorus metabolic process	64	2646	35698	0.72	1	// Os08g0307400 // Os07g0678300 // Os08g0174700 // Os11g0209700 // Os02g0126400 // Os07g0150700 // Os01g0292200 // Os03g0772600 // Os03g0192700 // Os12g0145700 // Os11g0102200 // Os11g0607900 // Os12g0101800 // Os05g0566400 // Os05g0402700 // Os07g0695800 // Os06g0202900 // Os05g0522600 // Os04g0169100 // Os09g0356200 // Os01g0905800 // Os03g0285800 // Os07g0438500 // Os04g0598900 // Os02g0228300…
GO:0005576	C	extracellular region	16	700	35698	0.72	1	// Os12g0147800 // Os01g0132000 // Os03g0823400 // Os10g0450900 // Os09g0472900 // Os07g0124100 // Os07g0119800 // Os06g0697000 // Os08g0237000 // Os02g0532500 // Os01g0124000 // Os01g0382000 // Os06g0573600 // Os07g0129200 // Os05g0462400 // Os07g0129300
GO:0008324	F	cation transmembrane transporter activity	9	411	35698	0.73	1	// Os05g0113300 // Os06g0568200 // Os07g0102100 // Os04g0607500 // Os11g0648000 // Os02g0176700 // Os09g0563200 // Os03g0278900 // Os06g0270200
GO:0004674	F	protein serine/threonine kinase activity	38	1618	35698	0.74	1	// Os03g0329700 // Os07g0678300 // Os02g0126400 // Os07g0150700 // Os01g0292200 // Os12g0101800 // Os11g0102200 // Os11g0607900 // Os04g0598900 // Os05g0566400 // Os06g0202900 // Os05g0522600 // Os08g0174700 // Os07g0438500 // Os03g0285800 // Os09g0356200 // Os02g0228300 // Os01g0127700 // Os10g0180800 // Os08g0203600 // Os06g0288100 // Os05g0481100 // Os02g0787300 // Os09g0418000 // Os06g0663200…
GO:0004672	F	protein kinase activity	44	1857	35698	0.74	1	// Os01g0310500 // Os07g0678300 // Os08g0174700 // Os02g0126400 // Os07g0150700 // Os01g0292200 // Os03g0772600 // Os11g0102200 // Os11g0607900 // Os04g0598900 // Os05g0566400 // Os06g0202900 // Os05g0522600 // Os04g0169100 // Os09g0356200 // Os03g0285800 // Os07g0438500 // Os02g0228300 // Os01g0127700 // Os02g0777800 // Os06g0142500 // Os10g0180800 // Os08g0203600 // Os12g0101800 // Os06g0288100…
GO:0032991	C	macromolecular complex	48	2038	35698	0.76	1	// Os09g0347300 // Os07g0147500 // Os01g0800500 // Os05g0243200 // Os02g0540700 // Os01g0896700 // Os02g0741500 // Os05g0473500 // Os06g0647100 // Os08g0215200 // Os03g0425000 // Os02g0822600 // Os03g0799000 // Os12g0291100 // Os07g0134800 // Os04g0691600 // Os10g0356000 // Os03g0769100 // Os06g0568200 // Os02g0488600 // Os01g0662300 // Os03g0761100 // Os01g0905300 // Os03g0815400 // Os07g0173700…
GO:0007165	P	signal transduction	19	856	35698	0.77	1	// Os05g0178600 // Os11g0209700 // Os11g0671000 // Os11g0143300 // Os12g0101800 // Os03g0180900 // Os12g0139400 // Os08g0307400 // Os04g0169100 // Os12g0224000 // Os01g0178500 // Os09g0439200 // Os07g0150700 // Os01g0292200 // Os07g0678300 // Os09g0418000 // Os11g0102200 // Os07g0622000 // Os03g0181100
GO:0005506	F	iron ion binding	12	556	35698	0.77	1	// Os02g0771600 // Os08g0508800 // Os02g0194700 // Os04g0581100 // Os05g0127500 // Os03g0803500 // Os08g0560000 // Os04g0578600 // Os04g0447100 // Os11g0592800 // Os03g0122300 // Os08g0509100
GO:0009755	P	hormone-mediated signaling pathway	8	389	35698	0.78	1	// Os05g0178600 // Os03g0180900 // Os11g0671000 // Os04g0169100 // Os01g0178500 // Os09g0439200 // Os03g0181100 // Os07g0622000
GO:0006468	P	protein phosphorylation	44	1891	35698	0.78	1	// Os01g0310500 // Os07g0678300 // Os08g0174700 // Os02g0126400 // Os07g0150700 // Os01g0292200 // Os03g0772600 // Os11g0102200 // Os11g0607900 // Os04g0598900 // Os05g0566400 // Os06g0202900 // Os05g0522600 // Os04g0169100 // Os09g0356200 // Os03g0285800 // Os07g0438500 // Os02g0228300 // Os01g0127700 // Os02g0777800 // Os06g0142500 // Os10g0180800 // Os08g0203600 // Os12g0101800 // Os06g0288100…
GO:0098796	C	membrane protein complex	9	432	35698	0.78	1	// Os07g0147500 // Os06g0568200 // Os06g0731800 // Os08g0307400 // Os05g0560000 // Os03g0278900 // Os12g0104800 // Os07g0134800 // Os01g0911200
GO:0044700	P	single organism signaling	19	865	35698	0.79	1	// Os05g0178600 // Os11g0209700 // Os11g0671000 // Os11g0143300 // Os12g0101800 // Os03g0180900 // Os12g0139400 // Os08g0307400 // Os04g0169100 // Os12g0224000 // Os01g0178500 // Os09g0439200 // Os07g0150700 // Os01g0292200 // Os07g0678300 // Os09g0418000 // Os11g0102200 // Os07g0622000 // Os03g0181100
GO:0036211	P	protein modification process	60	2550	35698	0.79	1	// Os01g0310500 // Os07g0678300 // Os01g0800500 // Os08g0174700 // Os02g0540700 // Os02g0126400 // Os07g0150700 // Os01g0292200 // Os03g0772600 // Os11g0102200 // Os06g0661800 // Os11g0607900 // Os04g0598900 // Os05g0566400 // Os06g0202900 // Os05g0522600 // Os04g0169100 // Os09g0356200 // Os03g0285800 // Os07g0438500 // Os02g0228300 // Os01g0127700 // Os01g0681600 // Os02g0777800 // Os02g0791700…
GO:0023052	P	signaling	19	866	35698	0.79	1	// Os05g0178600 // Os11g0209700 // Os11g0671000 // Os11g0143300 // Os12g0101800 // Os03g0180900 // Os12g0139400 // Os08g0307400 // Os04g0169100 // Os12g0224000 // Os01g0178500 // Os09g0439200 // Os07g0150700 // Os01g0292200 // Os07g0678300 // Os09g0418000 // Os11g0102200 // Os07g0622000 // Os03g0181100
GO:0009057	P	macromolecule catabolic process	9	437	35698	0.79	1	// Os11g0592000 // Os06g0264300 // Os11g0592100 // Os07g0543300 // Os03g0141200 // Os04g0493400 // Os11g0592200 // Os02g0205300 // Os10g0465700
GO:0006464	P	cellular protein modification process	60	2550	35698	0.79	1	// Os01g0310500 // Os07g0678300 // Os01g0800500 // Os08g0174700 // Os02g0540700 // Os02g0126400 // Os07g0150700 // Os01g0292200 // Os03g0772600 // Os11g0102200 // Os06g0661800 // Os11g0607900 // Os04g0598900 // Os05g0566400 // Os06g0202900 // Os05g0522600 // Os04g0169100 // Os09g0356200 // Os03g0285800 // Os07g0438500 // Os02g0228300 // Os01g0127700 // Os01g0681600 // Os02g0777800 // Os02g0791700…
GO:0044699	P	single-organism process	185	7625	35698	0.83	1	// Os03g0189400 // Os11g0116000 // Os12g0207600 // Os09g0347300 // Os07g0147900 // Os01g0588900 // Os04g0624600 // Os04g0447100 // Os02g0240300 // Os11g0102200 // Os02g0601300 // Os10g0517500 // Os05g0402700 // Os04g0650800 // Os04g0338100 // Os08g0557600 // Os01g0949500 // Os04g0169100 // Os04g0518400 // Os01g0905800 // Os07g0677100 // Os01g0858900 // Os07g0424400 // Os12g0115500 // Os10g0109300…
GO:0004386	F	helicase activity	5	271	35698	0.83	1	// Os03g0108600 // Os03g0597200 // Os03g0101700 // Os02g0739000 // Os06g0255200
GO:0016301	F	kinase activity	47	2071	35698	0.83	1	// Os08g0307400 // Os07g0678300 // Os08g0174700 // Os02g0126400 // Os07g0150700 // Os01g0292200 // Os03g0772600 // Os11g0102200 // Os11g0607900 // Os04g0598900 // Os05g0566400 // Os06g0202900 // Os05g0522600 // Os04g0169100 // Os09g0356200 // Os03g0285800 // Os07g0438500 // Os02g0228300 // Os01g0127700 // Os02g0777800 // Os06g0142500 // Os10g0180800 // Os08g0203600 // Os12g0101800 // Os06g0288100…
GO:0043232	C	intracellular non-membrane-bounded organelle	26	1201	35698	0.84	1	// Os05g0243200 // Os06g0281400 // Os01g0896700 // Os06g0647100 // Os08g0215200 // Os03g0425000 // Os02g0274100 // Os02g0822600 // Os03g0799000 // Os03g0196800 // Os04g0691600 // Os03g0769100 // Os01g0662300 // Os03g0815400 // Os07g0173700 // Os07g0574800 // Os03g0843400 // Os03g0856500 // Os01g0633000 // Os01g0805900 // Os01g0678600 // Os05g0101400 // Os06g0671900 // Os03g0219900 // Os01g0896800…
GO:0043412	P	macromolecule modification	61	2675	35698	0.85	1	// Os01g0310500 // Os07g0678300 // Os01g0800500 // Os08g0174700 // Os02g0540700 // Os02g0126400 // Os07g0150700 // Os01g0292200 // Os03g0772600 // Os11g0102200 // Os06g0661800 // Os11g0607900 // Os04g0598900 // Os05g0566400 // Os06g0202900 // Os05g0522600 // Os04g0169100 // Os09g0356200 // Os03g0285800 // Os07g0438500 // Os02g0228300 // Os01g0127700 // Os01g0681600 // Os02g0777800 // Os02g0791700…
GO:0032870	P	cellular response to hormone stimulus	8	443	35698	0.88	1	// Os05g0178600 // Os03g0180900 // Os11g0671000 // Os04g0169100 // Os01g0178500 // Os09g0439200 // Os03g0181100 // Os07g0622000
GO:0032555	F	purine ribonucleotide binding	89	3866	35698	0.88	1	// Os02g0126400 // Os01g0290800 // Os06g0229000 // Os11g0102200 // Os02g0157700 // Os04g0169100 // Os08g0487800 // Os03g0285800 // Os01g0127700 // Os12g0101800 // Os06g0288100 // Os08g0384500 // Os07g0574800 // Os02g0787300 // Os09g0418000 // Os06g0663200 // Os07g0622000 // Os11g0670900 // Os02g0154200 // Os05g0427100 // Os11g0416900 // Os09g0474300 // Os06g0340200 // Os10g0180800 // Os09g0442100…
GO:0032550	F	purine ribonucleoside binding	89	3866	35698	0.88	1	// Os02g0126400 // Os01g0290800 // Os06g0229000 // Os11g0102200 // Os02g0157700 // Os04g0169100 // Os08g0487800 // Os03g0285800 // Os01g0127700 // Os12g0101800 // Os06g0288100 // Os08g0384500 // Os07g0574800 // Os02g0787300 // Os09g0418000 // Os06g0663200 // Os07g0622000 // Os11g0670900 // Os02g0154200 // Os05g0427100 // Os11g0416900 // Os09g0474300 // Os06g0340200 // Os10g0180800 // Os09g0442100…
GO:0001883	F	purine nucleoside binding	89	3866	35698	0.88	1	// Os02g0126400 // Os01g0290800 // Os06g0229000 // Os11g0102200 // Os02g0157700 // Os04g0169100 // Os08g0487800 // Os03g0285800 // Os01g0127700 // Os12g0101800 // Os06g0288100 // Os08g0384500 // Os07g0574800 // Os02g0787300 // Os09g0418000 // Os06g0663200 // Os07g0622000 // Os11g0670900 // Os02g0154200 // Os05g0427100 // Os11g0416900 // Os09g0474300 // Os06g0340200 // Os10g0180800 // Os09g0442100…
GO:0071495	P	cellular response to endogenous stimulus	8	446	35698	0.89	1	// Os05g0178600 // Os03g0180900 // Os11g0671000 // Os04g0169100 // Os01g0178500 // Os09g0439200 // Os03g0181100 // Os07g0622000
GO:0001882	F	nucleoside binding	89	3877	35698	0.89	1	// Os02g0126400 // Os01g0290800 // Os06g0229000 // Os11g0102200 // Os02g0157700 // Os04g0169100 // Os08g0487800 // Os03g0285800 // Os01g0127700 // Os12g0101800 // Os06g0288100 // Os08g0384500 // Os07g0574800 // Os02g0787300 // Os09g0418000 // Os06g0663200 // Os07g0622000 // Os11g0670900 // Os02g0154200 // Os05g0427100 // Os11g0416900 // Os09g0474300 // Os06g0340200 // Os10g0180800 // Os09g0442100…
GO:0015075	F	ion transmembrane transporter activity	10	541	35698	0.89	1	// Os05g0113300 // Os06g0568200 // Os07g0102100 // Os04g0607500 // Os11g0648000 // Os02g0176700 // Os05g0502000 // Os09g0563200 // Os03g0278900 // Os06g0270200
GO:0032549	F	ribonucleoside binding	89	3876	35698	0.89	1	// Os02g0126400 // Os01g0290800 // Os06g0229000 // Os11g0102200 // Os02g0157700 // Os04g0169100 // Os08g0487800 // Os03g0285800 // Os01g0127700 // Os12g0101800 // Os06g0288100 // Os08g0384500 // Os07g0574800 // Os02g0787300 // Os09g0418000 // Os06g0663200 // Os07g0622000 // Os11g0670900 // Os02g0154200 // Os05g0427100 // Os11g0416900 // Os09g0474300 // Os06g0340200 // Os10g0180800 // Os09g0442100…
GO:0017076	F	purine nucleotide binding	89	3913	35698	0.9	1	// Os02g0126400 // Os01g0290800 // Os06g0229000 // Os11g0102200 // Os02g0157700 // Os04g0169100 // Os08g0487800 // Os03g0285800 // Os01g0127700 // Os12g0101800 // Os06g0288100 // Os08g0384500 // Os07g0574800 // Os02g0787300 // Os09g0418000 // Os06g0663200 // Os07g0622000 // Os11g0670900 // Os02g0154200 // Os05g0427100 // Os11g0416900 // Os09g0474300 // Os06g0340200 // Os10g0180800 // Os09g0442100…
GO:0032553	F	ribonucleotide binding	89	3908	35698	0.9	1	// Os02g0126400 // Os01g0290800 // Os06g0229000 // Os11g0102200 // Os02g0157700 // Os04g0169100 // Os08g0487800 // Os03g0285800 // Os01g0127700 // Os12g0101800 // Os06g0288100 // Os08g0384500 // Os07g0574800 // Os02g0787300 // Os09g0418000 // Os06g0663200 // Os07g0622000 // Os11g0670900 // Os02g0154200 // Os05g0427100 // Os11g0416900 // Os09g0474300 // Os06g0340200 // Os10g0180800 // Os09g0442100…
GO:0022804	F	active transmembrane transporter activity	8	453	35698	0.9	1	// Os01g0723800 // Os04g0209300 // Os05g0113300 // Os06g0568200 // Os11g0648000 // Os02g0176700 // Os01g0290800 // Os12g0125500
GO:0006974	P	cellular response to DNA damage stimulus	5	317	35698	0.91	1	// Os03g0710800 // Os02g0573200 // Os06g0264300 // Os11g0615800 // Os06g0661800
GO:0032559	F	adenyl ribonucleotide binding	82	3635	35698	0.91	1	// Os01g0723800 // Os02g0526400 // Os05g0522600 // Os03g0772600 // Os06g0142500 // Os08g0174700 // Os09g0442100 // Os02g0697400 // Os02g0739000 // Os12g0514500 // Os02g0126400 // Os07g0150700 // Os09g0556500 // Os01g0310500 // Os01g0292200 // Os11g0588400 // Os03g0859700 // Os11g0605100 // Os11g0102200 // Os08g0398000 // Os03g0101700 // Os01g0609300 // Os05g0566400 // Os02g0205300 // Os11g0588600…
GO:0097367	F	carbohydrate derivative binding	89	3953	35698	0.92	1	// Os02g0126400 // Os01g0290800 // Os06g0229000 // Os11g0102200 // Os02g0157700 // Os04g0169100 // Os08g0487800 // Os03g0285800 // Os01g0127700 // Os12g0101800 // Os06g0288100 // Os08g0384500 // Os07g0574800 // Os02g0787300 // Os09g0418000 // Os06g0663200 // Os07g0622000 // Os11g0670900 // Os02g0154200 // Os05g0427100 // Os11g0416900 // Os09g0474300 // Os06g0340200 // Os10g0180800 // Os09g0442100…
GO:0071554	P	cell wall organization or biogenesis	5	335	35698	0.93	1	// Os11g0592100 // Os11g0592000 // Os10g0524300 // Os04g0493400 // Os11g0592200
GO:0043207	P	response to external biotic stimulus	11	628	35698	0.93	1	// Os11g0592000 // Os08g0508800 // Os02g0654700 // Os03g0180900 // Os02g0437200 // Os11g0592100 // Os09g0439200 // Os04g0493400 // Os03g0181100 // Os11g0592200 // Os07g0661400
GO:0051707	P	response to other organism	11	628	35698	0.93	1	// Os11g0592000 // Os08g0508800 // Os02g0654700 // Os03g0180900 // Os02g0437200 // Os11g0592100 // Os09g0439200 // Os04g0493400 // Os03g0181100 // Os11g0592200 // Os07g0661400
GO:0050794	P	regulation of cellular process	64	2948	35698	0.93	1	// Os11g0143300 // Os01g0667900 // Os03g0180900 // Os04g0610400 // Os11g0671000 // Os02g0655200 // Os07g0150700 // Os01g0292200 // Os12g0101800 // Os03g0183200 // Os09g0287000 // Os05g0322900 // Os09g0457900 // Os11g0102200 // Os05g0343400 // Os01g0821600 // Os09g0522000 // Os07g0583600 // Os02g0764700 // Os09g0522100 // Os05g0497300 // Os04g0169100 // Os05g0178600 // Os03g0181100 // Os03g0402800…
GO:0030554	F	adenyl nucleotide binding	82	3680	35698	0.93	1	// Os01g0723800 // Os02g0526400 // Os05g0522600 // Os03g0772600 // Os06g0142500 // Os08g0174700 // Os09g0442100 // Os02g0697400 // Os02g0739000 // Os12g0514500 // Os02g0126400 // Os07g0150700 // Os09g0556500 // Os01g0310500 // Os01g0292200 // Os11g0588400 // Os03g0859700 // Os11g0605100 // Os11g0102200 // Os08g0398000 // Os03g0101700 // Os01g0609300 // Os05g0566400 // Os02g0205300 // Os11g0588600…
GO:0048046	C	apoplast	6	399	35698	0.94	1	// Os07g0119800 // Os06g0697000 // Os02g0532500 // Os08g0237000 // Os06g0573600 // Os05g0462400
GO:0044248	P	cellular catabolic process	13	749	35698	0.95	1	// Os05g0427400 // Os06g0264300 // Os02g0626100 // Os11g0592000 // Os11g0592100 // Os10g0524300 // Os04g0518400 // Os02g0627100 // Os04g0493400 // Os02g0274100 // Os11g0592200 // Os10g0550900 // Os02g0581400
GO:0022857	F	transmembrane transporter activity	17	932	35698	0.95	1	// Os01g0723800 // Os04g0209300 // Os05g0113300 // Os06g0568200 // Os07g0102100 // Os04g0607500 // Os11g0648000 // Os02g0176700 // Os07g0559700 // Os05g0502000 // Os09g0563200 // Os07g0582400 // Os03g0278900 // Os01g0290800 // Os06g0270200 // Os03g0170900 // Os12g0125500
GO:0016747	F	transferase activity, transferring acyl groups other than amino-acyl groups	6	408	35698	0.95	1	// Os05g0179300 // Os01g0529800 // Os01g0179000 // Os02g0814000 // Os02g0589000 // Os04g0500700
GO:0022891	F	substrate-specific transmembrane transporter activity	13	757	35698	0.95	1	// Os05g0113300 // Os06g0568200 // Os07g0102100 // Os04g0607500 // Os11g0648000 // Os02g0176700 // Os07g0559700 // Os05g0502000 // Os09g0563200 // Os07g0582400 // Os03g0278900 // Os06g0270200 // Os03g0170900
GO:0003677	F	DNA binding	51	2436	35698	0.95	1	// Os05g0525900 // Os03g0133000 // Os07g0683200 // Os03g0315400 // Os11g0615800 // Os03g0270000 // Os01g0863300 // Os06g0348800 // Os05g0322900 // Os02g0720900 // Os11g0684000 // Os06g0661800 // Os01g0821600 // Os01g0975300 // Os03g0799000 // Os05g0343400 // Os03g0327800 // Os06g0726300 // Os04g0637000 // Os02g0203000 // Os07g0680400 // Os12g0567300 // Os02g0527300 // Os03g0101700 // Os09g0474000…
GO:0042578	F	phosphoric ester hydrolase activity	5	353	35698	0.95	1	// Os03g0292100 // Os09g0535900 // Os01g0739200 // Os03g0761100 // Os01g0800500
GO:0043234	C	protein complex	28	1439	35698	0.95	1	// Os09g0347300 // Os07g0147500 // Os02g0540700 // Os02g0741500 // Os01g0800500 // Os03g0799000 // Os12g0291100 // Os07g0134800 // Os10g0356000 // Os06g0568200 // Os02g0488600 // Os01g0905300 // Os03g0761100 // Os03g0583700 // Os01g0905200 // Os12g0104800 // Os02g0205300 // Os01g0911200 // Os05g0473500 // Os05g0476700 // Os04g0418500 // Os08g0307400 // Os03g0292100 // Os05g0560000 // Os02g0539200…
GO:0000166	F	nucleotide binding	101	4588	35698	0.96	1	// Os02g0126400 // Os01g0290800 // Os06g0229000 // Os11g0102200 // Os02g0601300 // Os02g0157700 // Os04g0650800 // Os08g0557600 // Os04g0169100 // Os08g0487800 // Os03g0285800 // Os01g0127700 // Os12g0101800 // Os06g0288100 // Os08g0384500 // Os07g0574800 // Os02g0787300 // Os09g0418000 // Os06g0663200 // Os07g0622000 // Os11g0670900 // Os02g0154200 // Os05g0427100 // Os11g0416900 // Os09g0474300…
GO:1901265	F	nucleoside phosphate binding	101	4588	35698	0.96	1	// Os02g0126400 // Os01g0290800 // Os06g0229000 // Os11g0102200 // Os02g0601300 // Os02g0157700 // Os04g0650800 // Os08g0557600 // Os04g0169100 // Os08g0487800 // Os03g0285800 // Os01g0127700 // Os12g0101800 // Os06g0288100 // Os08g0384500 // Os07g0574800 // Os02g0787300 // Os09g0418000 // Os06g0663200 // Os07g0622000 // Os11g0670900 // Os02g0154200 // Os05g0427100 // Os11g0416900 // Os09g0474300…
GO:0036094	F	small molecule binding	103	4661	35698	0.96	1	// Os02g0126400 // Os01g0290800 // Os06g0229000 // Os11g0102200 // Os02g0601300 // Os02g0157700 // Os04g0650800 // Os08g0557600 // Os04g0169100 // Os08g0487800 // Os03g0285800 // Os01g0127700 // Os12g0101800 // Os06g0288100 // Os08g0384500 // Os07g0574800 // Os02g0787300 // Os09g0418000 // Os06g0663200 // Os07g0622000 // Os11g0670900 // Os02g0154200 // Os05g0427100 // Os11g0416900 // Os09g0474300…
GO:0050789	P	regulation of biological process	70	3338	35698	0.97	1	// Os02g0137700 // Os11g0143300 // Os01g0667900 // Os03g0180900 // Os04g0610400 // Os11g0671000 // Os02g0655200 // Os01g0588900 // Os07g0150700 // Os01g0292200 // Os12g0101800 // Os03g0183200 // Os09g0287000 // Os05g0322900 // Os09g0457900 // Os11g0102200 // Os05g0343400 // Os01g0821600 // Os09g0522000 // Os07g0583600 // Os02g0764700 // Os09g0522100 // Os05g0497300 // Os04g0169100 // Os05g0557700…
GO:0098542	P	defense response to other organism	6	438	35698	0.97	1	// Os11g0592000 // Os03g0180900 // Os11g0592100 // Os09g0439200 // Os11g0592200 // Os03g0181100
GO:0071310	P	cellular response to organic substance	8	545	35698	0.97	1	// Os05g0178600 // Os03g0180900 // Os11g0671000 // Os04g0169100 // Os01g0178500 // Os09g0439200 // Os03g0181100 // Os07g0622000
GO:0003824	F	catalytic activity	346	14518	35698	0.97	1	// Os03g0189400 // Os01g0734600 // Os01g0940800 // Os04g0624600 // Os07g0179300 // Os11g0604700 // Os12g0189300 // Os04g0320700 // Os08g0557600 // Os04g0169100 // Os03g0285800 // Os07g0687900 // Os08g0498400 // Os03g0701200 // Os10g0109300 // Os06g0697000 // Os02g0187800 // Os04g0556400 // Os06g0663200 // Os11g0670900 // Os07g0677500 // Os10g0537800 // Os05g0427100 // Os07g0543300 // Os06g0340200…
GO:0042651	C	thylakoid membrane	5	395	35698	0.97	1	// Os12g0575000 // Os05g0560000 // Os07g0147500 // Os06g0229000 // Os07g0147900
GO:0007154	P	cell communication	19	1105	35698	0.98	1	// Os05g0178600 // Os11g0209700 // Os11g0671000 // Os11g0143300 // Os12g0101800 // Os03g0180900 // Os12g0139400 // Os08g0307400 // Os04g0169100 // Os12g0224000 // Os01g0178500 // Os09g0439200 // Os07g0150700 // Os01g0292200 // Os07g0678300 // Os09g0418000 // Os11g0102200 // Os07g0622000 // Os03g0181100
GO:0022892	F	substrate-specific transporter activity	13	834	35698	0.98	1	// Os05g0113300 // Os06g0568200 // Os07g0102100 // Os04g0607500 // Os11g0648000 // Os02g0176700 // Os07g0559700 // Os05g0502000 // Os09g0563200 // Os07g0582400 // Os03g0278900 // Os06g0270200 // Os03g0170900
GO:0034357	C	photosynthetic membrane	5	408	35698	0.98	1	// Os12g0575000 // Os05g0560000 // Os07g0147500 // Os06g0229000 // Os07g0147900
GO:0044436	C	thylakoid part	5	426	35698	0.98	1	// Os12g0575000 // Os05g0560000 // Os07g0147500 // Os06g0229000 // Os07g0147900
GO:0045184	P	establishment of protein localization	5	461	35698	0.99	1	// Os02g0437200 // Os02g0741500 // Os06g0731800 // Os12g0104800 // Os01g0151200
GO:0019538	P	protein metabolic process	107	5152	35698	0.99	1	// Os03g0119300 // Os02g0126400 // Os07g0112800 // Os06g0229000 // Os11g0102200 // Os03g0425000 // Os02g0822600 // Os04g0169100 // Os03g0285800 // Os09g0564000 // Os01g0127700 // Os01g0858900 // Os02g0488600 // Os06g0288100 // Os07g0173700 // Os02g0787300 // Os09g0418000 // Os06g0663200 // Os07g0622000 // Os11g0670900 // Os06g0264300 // Os10g0537800 // Os05g0427100 // Os06g0340200 // Os02g0154200…
GO:0001101	P	response to acid chemical	10	729	35698	0.99	1	// Os07g0661400 // Os03g0180900 // Os01g0511000 // Os09g0439200 // Os03g0181100 // Os03g0402800 // Os03g0655400 // Os02g0669100 // Os07g0635900 // Os07g0622000
GO:0065007	P	biological regulation	75	3668	35698	0.99	1	// Os03g0119300 // Os02g0137700 // Os11g0143300 // Os01g0667900 // Os03g0180900 // Os04g0610400 // Os11g0671000 // Os04g0430700 // Os02g0655200 // Os01g0588900 // Os07g0150700 // Os01g0292200 // Os12g0101800 // Os03g0183200 // Os09g0287000 // Os05g0322900 // Os09g0457900 // Os11g0102200 // Os05g0343400 // Os01g0821600 // Os09g0522000 // Os07g0583600 // Os02g0764700 // Os04g0669200 // Os09g0522100…
GO:0006952	P	defense response	20	1205	35698	0.99	1	// Os09g0417600 // Os03g0300400 // Os11g0474800 // Os03g0180900 // Os02g0571100 // Os04g0178300 // Os03g0130300 // Os02g0570400 // Os05g0494200 // Os12g0555000 // Os09g0439200 // Os11g0592100 // Os12g0555500 // Os11g0592200 // Os03g0181100 // Os03g0402800 // Os04g0178400 // Os11g0592000 // Os12g0555200 // Os02g0181300
GO:0050896	P	response to stimulus	92	4492	35698	0.99	1	// Os03g0300400 // Os06g0727200 // Os01g0149800 // Os08g0504700 // Os07g0563400 // Os02g0240300 // Os11g0102200 // Os04g0549600 // Os05g0402700 // Os01g0511000 // Os04g0169100 // Os06g0547400 // Os07g0677100 // Os02g0181300 // Os02g0677300 // Os10g0109300 // Os07g0673400 // Os03g0235000 // Os09g0418000 // Os07g0622000 // Os11g0592000 // Os06g0264300 // Os07g0677500 // Os12g0555500 // Os02g0570400…
GO:0070887	P	cellular response to chemical stimulus	8	612	35698	0.99	1	// Os05g0178600 // Os03g0180900 // Os11g0671000 // Os04g0169100 // Os01g0178500 // Os09g0439200 // Os03g0181100 // Os07g0622000
GO:1902578	P	single-organism localization	21	1262	35698	0.99	1	// Os01g0905200 // Os03g0103200 // Os06g0568200 // Os11g0116000 // Os03g0718800 // Os03g0170900 // Os12g0115500 // Os05g0550300 // Os03g0278900 // Os01g0905300 // Os12g0115100 // Os09g0347300 // Os11g0116200 // Os11g0115400 // Os03g0103300 // Os12g0125500 // Os01g0151200 // Os10g0505700 // Os12g0115300 // Os02g0741500 // Os05g0473500
GO:0009725	P	response to hormone	13	917	35698	0.99	1	// Os05g0178600 // Os01g0511000 // Os11g0143300 // Os03g0180900 // Os12g0139400 // Os11g0671000 // Os04g0169100 // Os01g0178500 // Os09g0439200 // Os03g0181100 // Os03g0402800 // Os07g0635900 // Os07g0622000
GO:0044765	P	single-organism transport	20	1246	35698	0.99	1	// Os01g0905200 // Os03g0103200 // Os06g0568200 // Os11g0116000 // Os03g0718800 // Os03g0170900 // Os12g0115500 // Os05g0550300 // Os03g0278900 // Os01g0905300 // Os12g0115100 // Os09g0347300 // Os11g0116200 // Os11g0115400 // Os03g0103300 // Os12g0125500 // Os02g0741500 // Os10g0505700 // Os12g0115300 // Os05g0473500
GO:0016746	F	transferase activity, transferring acyl groups	6	496	35698	0.99	1	// Os05g0179300 // Os01g0529800 // Os01g0179000 // Os02g0814000 // Os02g0589000 // Os04g0500700
GO:0008104	P	protein localization	5	493	35698	1	1	// Os02g0437200 // Os02g0741500 // Os06g0731800 // Os12g0104800 // Os01g0151200
GO:0071840	P	cellular component organization or biogenesis	10	1766	35698	1	1	// Os01g0805900 // Os02g0437200 // Os08g0215200 // Os01g0151200 // Os02g0122900 // Os02g0739100 // Os06g0671900 // Os03g0799000 // Os06g0281400 // Os07g0574800
GO:0051716	P	cellular response to stimulus	24	1517	35698	1	1	// Os11g0143300 // Os03g0180900 // Os11g0671000 // Os11g0615800 // Os07g0150700 // Os02g0573200 // Os01g0292200 // Os12g0101800 // Os11g0102200 // Os06g0661800 // Os04g0169100 // Os05g0178600 // Os03g0181100 // Os09g0418000 // Os03g0710800 // Os12g0224000 // Os01g0178500 // Os07g0678300 // Os11g0209700 // Os07g0622000 // Os06g0264300 // Os12g0139400 // Os08g0307400 // Os09g0439200
GO:0046483	P	heterocycle metabolic process	85	7926	35698	1	1	// Os05g0100500 // Os04g0610400 // Os02g0168800 // Os12g0101800 // Os03g0180900 // Os10g0100700 // Os09g0442600 // Os02g0527300 // Os02g0655200 // Os01g0588900 // Os02g0573200 // Os11g0572700 // Os06g0281400 // Os02g0739600 // Os05g0537100 // Os12g0145700 // Os03g0183200 // Os09g0287000 // Os11g0102200 // Os09g0457900 // Os08g0474000 // Os05g0322900 // Os06g0661800 // Os01g0821600 // Os09g0522000…
GO:0009058	P	biosynthetic process	138	7021	35698	1	1	// Os12g0207600 // Os02g0168800 // Os01g0588900 // Os04g0624600 // Os07g0112800 // Os04g0447100 // Os11g0102200 // Os04g0650800 // Os11g0516000 // Os11g0530600 // Os03g0425000 // Os02g0822600 // Os04g0169100 // Os04g0518400 // Os03g0819600 // Os03g0402800 // Os07g0424400 // Os02g0677300 // Os07g0529600 // Os09g0334500 // Os07g0173700 // Os02g0187800 // Os08g0544800 // Os10g0550900 // Os04g0546800…
GO:0010033	P	response to organic substance	13	1123	35698	1	1	// Os05g0178600 // Os01g0511000 // Os11g0143300 // Os03g0180900 // Os12g0139400 // Os11g0671000 // Os04g0169100 // Os01g0178500 // Os09g0439200 // Os03g0181100 // Os03g0402800 // Os07g0635900 // Os07g0622000
GO:0051704	P	multi-organism process	11	1013	35698	1	1	// Os11g0592000 // Os08g0508800 // Os02g0654700 // Os03g0180900 // Os02g0437200 // Os11g0592100 // Os09g0439200 // Os04g0493400 // Os03g0181100 // Os11g0592200 // Os07g0661400
GO:0009605	P	response to external stimulus	11	849	35698	1	1	// Os11g0592000 // Os08g0508800 // Os02g0654700 // Os03g0180900 // Os02g0437200 // Os11g0592100 // Os09g0439200 // Os04g0493400 // Os03g0181100 // Os11g0592200 // Os07g0661400
GO:0044707	P	single-multicellular organism process	8	1706	35698	1	1	// Os12g0147800 // Os01g0588900 // Os06g0552900 // Os03g0180900 // Os07g0124100 // Os09g0439200 // Os08g0544800 // Os03g0181100
GO:0044249	P	cellular biosynthetic process	124	6786	35698	1	1	// Os12g0207600 // Os02g0168800 // Os01g0588900 // Os04g0624600 // Os07g0112800 // Os04g0447100 // Os11g0102200 // Os04g0650800 // Os03g0425000 // Os02g0822600 // Os04g0169100 // Os03g0402800 // Os07g0424400 // Os02g0677300 // Os07g0529600 // Os09g0334500 // Os07g0173700 // Os02g0187800 // Os08g0544800 // Os10g0550900 // Os04g0546800 // Os02g0181300 // Os08g0445700 // Os04g0429600 // Os05g0100500…
GO:0033554	P	cellular response to stress	5	594	35698	1	1	// Os03g0710800 // Os02g0573200 // Os06g0264300 // Os11g0615800 // Os06g0661800
GO:0019438	P	aromatic compound biosynthetic process	66	5006	35698	1	1	// Os05g0100500 // Os04g0610400 // Os02g0168800 // Os03g0180900 // Os10g0100700 // Os02g0527300 // Os02g0655200 // Os12g0101800 // Os03g0183200 // Os09g0287000 // Os05g0322900 // Os09g0457900 // Os11g0102200 // Os05g0343400 // Os01g0821600 // Os09g0522000 // Os05g0178600 // Os07g0583600 // Os02g0764700 // Os09g0522100 // Os05g0497300 // Os04g0169100 // Os07g0619600 // Os03g0181100 // Os03g0402800…
GO:0034645	P	cellular macromolecule biosynthetic process	86	5614	35698	1	1	// Os04g0624600 // Os07g0112800 // Os11g0102200 // Os03g0425000 // Os02g0822600 // Os04g0169100 // Os02g0181300 // Os07g0424400 // Os02g0677300 // Os09g0334500 // Os07g0173700 // Os08g0544800 // Os04g0546800 // Os04g0429600 // Os05g0100500 // Os04g0669200 // Os03g0219900 // Os03g0180900 // Os02g0655200 // Os06g0281400 // Os03g0183200 // Os05g0322900 // Os09g0457900 // Os05g0343400 // Os09g0522000…
GO:0006807	P	nitrogen compound metabolic process	133	8902	35698	1	1	// Os02g0168800 // Os01g0588900 // Os07g0112800 // Os11g0102200 // Os05g0402700 // Os04g0650800 // Os03g0425000 // Os02g0822600 // Os04g0169100 // Os04g0518400 // Os01g0905800 // Os02g0181300 // Os02g0677300 // Os07g0529600 // Os09g0334500 // Os07g0173700 // Os08g0434300 // Os08g0544800 // Os10g0517500 // Os10g0550900 // Os04g0546800 // Os11g0592000 // Os06g0264300 // Os03g0196800 // Os05g0100500…
GO:0044260	P	cellular macromolecule metabolic process	153	10759	35698	1	1	// Os02g0126400 // Os04g0624600 // Os07g0112800 // Os11g0102200 // Os03g0425000 // Os02g0822600 // Os04g0169100 // Os03g0285800 // Os08g0237000 // Os07g0622000 // Os01g0127700 // Os02g0677300 // Os03g0402800 // Os07g0424400 // Os11g0670900 // Os06g0288100 // Os09g0334500 // Os06g0697000 // Os07g0173700 // Os08g0544800 // Os02g0787300 // Os09g0418000 // Os06g0663200 // Os04g0546800 // Os02g0181300…
GO:1901362	P	organic cyclic compound biosynthetic process	66	5077	35698	1	1	// Os05g0100500 // Os04g0610400 // Os02g0168800 // Os03g0180900 // Os10g0100700 // Os02g0527300 // Os02g0655200 // Os12g0101800 // Os03g0183200 // Os09g0287000 // Os05g0322900 // Os09g0457900 // Os11g0102200 // Os05g0343400 // Os01g0821600 // Os09g0522000 // Os05g0178600 // Os07g0583600 // Os02g0764700 // Os09g0522100 // Os05g0497300 // Os04g0169100 // Os07g0619600 // Os03g0181100 // Os03g0402800…
GO:0016043	P	cellular component organization	9	1626	35698	1	1	// Os01g0805900 // Os02g0437200 // Os08g0215200 // Os01g0151200 // Os02g0739100 // Os06g0671900 // Os03g0799000 // Os06g0281400 // Os07g0574800
GO:0009719	P	response to endogenous stimulus	13	970	35698	1	1	// Os05g0178600 // Os01g0511000 // Os11g0143300 // Os03g0180900 // Os12g0139400 // Os11g0671000 // Os04g0169100 // Os01g0178500 // Os09g0439200 // Os03g0181100 // Os03g0402800 // Os07g0635900 // Os07g0622000
GO:1901360	P	organic cyclic compound metabolic process	92	8102	35698	1	1	// Os02g0168800 // Os11g0102200 // Os05g0402700 // Os04g0169100 // Os04g0518400 // Os01g0905800 // Os02g0181300 // Os02g0677300 // Os07g0529600 // Os09g0334500 // Os08g0434300 // Os08g0544800 // Os04g0546800 // Os06g0264300 // Os05g0100500 // Os04g0517100 // Os09g0539100 // Os08g0320400 // Os03g0180900 // Os02g0655200 // Os06g0281400 // Os03g0183200 // Os12g0145700 // Os05g0322900 // Os09g0457900…
GO:0055085	P	transmembrane transport	5	896	35698	1	1	// Os12g0125500 // Os07g0559700 // Os03g0278900 // Os06g0568200 // Os07g0582400
GO:0065008	P	regulation of biological quality	5	712	35698	1	1	// Os01g0368900 // Os04g0578600 // Os11g0648000 // Os01g0667900 // Os01g0588900
GO:0018130	P	heterocycle biosynthetic process	64	4955	35698	1	1	// Os05g0100500 // Os04g0610400 // Os02g0168800 // Os03g0180900 // Os10g0100700 // Os02g0527300 // Os02g0655200 // Os12g0101800 // Os03g0183200 // Os09g0287000 // Os05g0322900 // Os09g0457900 // Os11g0102200 // Os05g0343400 // Os01g0821600 // Os09g0522000 // Os05g0178600 // Os07g0583600 // Os02g0764700 // Os09g0522100 // Os05g0497300 // Os04g0169100 // Os07g0619600 // Os03g0181100 // Os03g0402800…
GO:0008152	P	metabolic process	351	16859	35698	1	1	// Os03g0189400 // Os01g0734600 // Os01g0940800 // Os04g0624600 // Os07g0112800 // Os12g0189300 // Os04g0320700 // Os03g0425000 // Os08g0557600 // Os04g0169100 // Os03g0285800 // Os09g0346500 // Os03g0701200 // Os10g0109300 // Os06g0697000 // Os07g0173700 // Os02g0187800 // Os09g0418000 // Os07g0642200 // Os11g0670900 // Os07g0677500 // Os10g0537800 // Os05g0427100 // Os07g0543300 // Os06g0340200…
GO:0034641	P	cellular nitrogen compound metabolic process	109	8480	35698	1	1	// Os02g0168800 // Os07g0112800 // Os11g0102200 // Os05g0402700 // Os03g0425000 // Os02g0822600 // Os04g0169100 // Os01g0905800 // Os02g0181300 // Os02g0677300 // Os07g0529600 // Os09g0334500 // Os07g0173700 // Os08g0434300 // Os08g0544800 // Os04g0546800 // Os06g0264300 // Os07g0134800 // Os05g0100500 // Os04g0517100 // Os03g0219900 // Os08g0320400 // Os03g0180900 // Os02g0655200 // Os06g0281400…
GO:0044271	P	cellular nitrogen compound biosynthetic process	90	5621	35698	1	1	// Os02g0168800 // Os07g0112800 // Os11g0102200 // Os03g0425000 // Os02g0822600 // Os04g0169100 // Os02g0181300 // Os02g0677300 // Os07g0529600 // Os09g0334500 // Os07g0173700 // Os08g0544800 // Os04g0546800 // Os05g0100500 // Os04g0669200 // Os03g0219900 // Os03g0180900 // Os02g0655200 // Os03g0183200 // Os05g0322900 // Os09g0457900 // Os05g0343400 // Os09g0522000 // Os07g0583600 // Os06g0568200…
GO:0048367	P	shoot system development	5	614	35698	1	1	// Os09g0439200 // Os01g0588900 // Os06g0552900 // Os03g0181100 // Os03g0180900
GO:0034654	P	nucleobase-containing compound biosynthetic process	58	4787	35698	1	1	// Os11g0143300 // Os03g0180900 // Os04g0610400 // Os02g0655200 // Os12g0101800 // Os03g0183200 // Os09g0287000 // Os05g0322900 // Os09g0457900 // Os11g0102200 // Os05g0343400 // Os01g0821600 // Os09g0522000 // Os05g0178600 // Os07g0583600 // Os02g0764700 // Os09g0522100 // Os05g0497300 // Os04g0169100 // Os07g0619600 // Os03g0181100 // Os03g0402800 // Os05g0100500 // Os04g0637000 // Os05g0537100…
GO:0006139	P	nucleobase-containing compound metabolic process	77	7692	35698	1	1	// Os04g0610400 // Os11g0143300 // Os12g0101800 // Os03g0180900 // Os07g0545800 // Os09g0442600 // Os11g0615800 // Os02g0655200 // Os02g0573200 // Os11g0572700 // Os06g0281400 // Os02g0739600 // Os05g0537100 // Os12g0145700 // Os03g0183200 // Os09g0287000 // Os11g0102200 // Os09g0457900 // Os05g0322900 // Os06g0661800 // Os01g0821600 // Os09g0522000 // Os05g0402700 // Os07g0695800 // Os02g0764700…
GO:0006508	P	proteolysis	19	1890	35698	1	1	// Os06g0264300 // Os04g0561500 // Os03g0365200 // Os10g0524600 // Os10g0537800 // Os04g0581100 // Os02g0771600 // Os04g0430700 // Os05g0557700 // Os09g0564000 // Os03g0388900 // Os06g0647400 // Os06g0229000 // Os05g0127500 // Os12g0434400 // Os10g0101200 // Os02g0720900 // Os03g0119300 // Os12g0583300
GO:0032501	P	multicellular organismal process	8	1885	35698	1	1	// Os12g0147800 // Os01g0588900 // Os06g0552900 // Os03g0180900 // Os07g0124100 // Os09g0439200 // Os08g0544800 // Os03g0181100
GO:0009628	P	response to abiotic stimulus	7	1462	35698	1	1	// Os02g0437200 // Os07g0661400 // Os06g0552900 // Os03g0655400 // Os02g0669100 // Os07g0635900 // Os07g0622000
GO:0009987	P	cellular process	280	15174	35698	1	1	// Os08g0507100 // Os09g0347300 // Os12g0207600 // Os02g0168800 // Os01g0667900 // Os05g0566400 // Os07g0147900 // Os02g0126400 // Os01g0588900 // Os04g0624600 // Os07g0112800 // Os04g0447100 // Os03g0859700 // Os11g0102200 // Os10g0517500 // Os04g0549600 // Os05g0402700 // Os04g0650800 // Os08g0215200 // Os03g0425000 // Os08g0557600 // Os02g0822600 // Os04g0169100 // Os04g0518400 // Os08g0487800…
GO:0006725	P	cellular aromatic compound metabolic process	93	8051	35698	1	1	// Os02g0168800 // Os01g0588900 // Os11g0102200 // Os05g0402700 // Os04g0169100 // Os04g0518400 // Os01g0905800 // Os02g0181300 // Os02g0677300 // Os07g0529600 // Os09g0334500 // Os08g0434300 // Os08g0544800 // Os04g0546800 // Os06g0264300 // Os05g0100500 // Os04g0517100 // Os09g0539100 // Os08g0320400 // Os03g0180900 // Os02g0655200 // Os06g0281400 // Os03g0183200 // Os12g0145700 // Os05g0322900…
GO:0043170	P	macromolecule metabolic process	176	12013	35698	1	1	// Os03g0119300 // Os02g0126400 // Os04g0624600 // Os07g0112800 // Os06g0229000 // Os11g0102200 // Os06g0647100 // Os03g0425000 // Os02g0822600 // Os04g0169100 // Os03g0285800 // Os09g0564000 // Os07g0622000 // Os01g0127700 // Os02g0677300 // Os03g0402800 // Os07g0424400 // Os11g0592000 // Os06g0288100 // Os09g0334500 // Os06g0697000 // Os07g0173700 // Os08g0544800 // Os02g0787300 // Os09g0418000…
GO:0048731	P	system development	5	1157	35698	1	1	// Os09g0439200 // Os01g0588900 // Os06g0552900 // Os03g0181100 // Os03g0180900
GO:0043933	P	macromolecular complex subunit organization	5	493	35698	1	1	// Os01g0805900 // Os06g0671900 // Os03g0799000 // Os07g0574800 // Os08g0215200
GO:0090304	P	nucleic acid metabolic process	63	7187	35698	1	1	// Os04g0610400 // Os11g0143300 // Os03g0180900 // Os07g0545800 // Os11g0615800 // Os02g0655200 // Os02g0573200 // Os11g0572700 // Os06g0281400 // Os12g0101800 // Os03g0183200 // Os09g0287000 // Os11g0102200 // Os09g0457900 // Os05g0322900 // Os06g0661800 // Os01g0821600 // Os09g0522000 // Os07g0583600 // Os02g0764700 // Os09g0522100 // Os05g0497300 // Os04g0169100 // Os05g0178600 // Os03g0181100…
GO:0044237	P	cellular metabolic process	240	13091	35698	1	1	// Os08g0507100 // Os12g0207600 // Os02g0168800 // Os05g0566400 // Os07g0147900 // Os02g0126400 // Os01g0588900 // Os04g0624600 // Os07g0112800 // Os04g0447100 // Os11g0102200 // Os10g0517500 // Os05g0178600 // Os05g0402700 // Os04g0650800 // Os03g0425000 // Os08g0557600 // Os02g0822600 // Os04g0169100 // Os04g0518400 // Os01g0905800 // Os03g0285800 // Os08g0237000 // Os07g0622000 // Os01g0127700…
GO:0007275	P	multicellular organism development	8	1665	35698	1	1	// Os12g0147800 // Os01g0588900 // Os06g0552900 // Os03g0180900 // Os07g0124100 // Os09g0439200 // Os08g0544800 // Os03g0181100
GO:0071704	P	organic substance metabolic process	279	14618	35698	1	1	// Os03g0119300 // Os12g0207600 // Os02g0168800 // Os11g0592000 // Os02g0570400 // Os01g0940800 // Os11g0209700 // Os02g0126400 // Os01g0588900 // Os04g0624600 // Os07g0112800 // Os06g0203600 // Os06g0229000 // Os04g0447100 // Os11g0102200 // Os02g0601300 // Os06g0663200 // Os05g0178600 // Os05g0402700 // Os04g0650800 // Os03g0425000 // Os02g0822600 // Os04g0169100 // Os04g0518400 // Os01g0905800…
GO:1901576	P	organic substance biosynthetic process	127	6784	35698	1	1	// Os12g0207600 // Os02g0168800 // Os04g0624600 // Os07g0112800 // Os04g0447100 // Os11g0102200 // Os04g0650800 // Os03g0425000 // Os02g0822600 // Os04g0169100 // Os03g0819600 // Os03g0402800 // Os07g0424400 // Os02g0677300 // Os07g0529600 // Os09g0334500 // Os07g0173700 // Os02g0187800 // Os08g0544800 // Os10g0550900 // Os04g0546800 // Os02g0181300 // Os08g0445700 // Os04g0429600 // Os05g0100500…
GO:0044767	P	single-organism developmental process	8	1861	35698	1	1	// Os12g0147800 // Os01g0588900 // Os06g0552900 // Os03g0180900 // Os07g0124100 // Os09g0439200 // Os08g0544800 // Os03g0181100
GO:0009059	P	macromolecule biosynthetic process	86	5638	35698	1	1	// Os04g0624600 // Os07g0112800 // Os11g0102200 // Os03g0425000 // Os02g0822600 // Os04g0169100 // Os02g0181300 // Os07g0424400 // Os02g0677300 // Os09g0334500 // Os07g0173700 // Os08g0544800 // Os04g0546800 // Os04g0429600 // Os05g0100500 // Os04g0669200 // Os03g0219900 // Os03g0180900 // Os02g0655200 // Os06g0281400 // Os03g0183200 // Os05g0322900 // Os09g0457900 // Os05g0343400 // Os09g0522000…
GO:0042221	P	response to chemical	17	1772	35698	1	1	// Os01g0511000 // Os07g0661400 // Os11g0143300 // Os03g0180900 // Os12g0139400 // Os11g0671000 // Os04g0169100 // Os01g0178500 // Os09g0439200 // Os03g0181100 // Os03g0402800 // Os05g0178600 // Os03g0655400 // Os12g0125500 // Os02g0669100 // Os07g0635900 // Os07g0622000
GO:1901700	P	response to oxygen-containing compound	10	985	35698	1	1	// Os07g0661400 // Os03g0180900 // Os01g0511000 // Os09g0439200 // Os03g0181100 // Os03g0402800 // Os03g0655400 // Os02g0669100 // Os07g0635900 // Os07g0622000
GO:0044238	P	primary metabolic process	248	13968	35698	1	1	// Os03g0119300 // Os12g0207600 // Os10g0517500 // Os02g0570400 // Os01g0940800 // Os11g0209700 // Os02g0126400 // Os04g0624600 // Os07g0112800 // Os06g0229000 // Os11g0102200 // Os02g0601300 // Os06g0663200 // Os05g0178600 // Os05g0402700 // Os04g0650800 // Os03g0425000 // Os02g0822600 // Os04g0169100 // Os04g0518400 // Os01g0905800 // Os03g0285800 // Os09g0564000 // Os07g0622000 // Os01g0127700…
GO:0048856	P	anatomical structure development	8	1889	35698	1	1	// Os12g0147800 // Os01g0588900 // Os06g0552900 // Os03g0180900 // Os07g0124100 // Os09g0439200 // Os08g0544800 // Os03g0181100
GO:0044085	P	cellular component biogenesis	5	622	35698	1	1	// Os01g0805900 // Os06g0671900 // Os03g0799000 // Os07g0574800 // Os02g0122900
GO:0006259	P	DNA metabolic process	7	4951	35698	1	1	// Os06g0264300 // Os04g0635500 // Os11g0615800 // Os02g0573200 // Os06g0281400 // Os11g0672300 // Os06g0661800
GO:0032502	P	developmental process	11	1926	35698	1	1	// Os12g0147800 // Os01g0588900 // Os01g0837600 // Os06g0552900 // Os03g0180900 // Os07g0124100 // Os09g0439200 // Os08g0544800 // Os03g0181100 // Os03g0280400 // Os05g0462000
GO:0016787	F	hydrolase activity	97	5758	35698	1	1	// Os03g0119300 // Os03g0823400 // Os01g0940800 // Os03g0388900 // Os01g0290800 // Os05g0429500 // Os02g0157700 // Os09g0564000 // Os03g0252100 // Os10g0492900 // Os03g0701200 // Os10g0524600 // Os06g0697000 // Os07g0574800 // Os03g0597200 // Os07g0642200 // Os07g0622000 // Os11g0592000 // Os07g0526600 // Os10g0537800 // Os07g0543300 // Os11g0416900 // Os10g0505700 // Os12g0611300 // Os02g0318500…
GO:0016788	F	hydrolase activity, acting on ester bonds	15	2211	35698	1	1	// Os03g0710800 // Os01g0223200 // Os01g0800500 // Os01g0841800 // Os01g0214200 // Os03g0761100 // Os06g0351500 // Os03g0292100 // Os09g0535900 // Os09g0538000 // Os09g0537700 // Os03g0365200 // Os01g0739200 // Os07g0642200 // Os02g0653900
GO:0016772	F	transferase activity, transferring phosphorus-containing groups	50	5156	35698	1	1	// Os08g0307400 // Os07g0678300 // Os06g0142500 // Os08g0174700 // Os02g0126400 // Os07g0150700 // Os01g0292200 // Os03g0772600 // Os12g0145700 // Os11g0102200 // Os11g0607900 // Os04g0598900 // Os05g0566400 // Os06g0202900 // Os05g0522600 // Os04g0169100 // Os09g0356200 // Os03g0285800 // Os07g0438500 // Os02g0228300 // Os01g0127700 // Os02g0777800 // Os03g0735000 // Os10g0180800 // Os08g0203600…
GO:0070011	F	peptidase activity, acting on L-amino acid peptides	21	1660	35698	1	1	// Os02g0771600 // Os04g0561500 // Os03g0365200 // Os10g0524600 // Os07g0524900 // Os10g0537800 // Os04g0581100 // Os03g0119300 // Os04g0430700 // Os06g0720700 // Os03g0151800 // Os09g0564000 // Os03g0388900 // Os06g0647400 // Os06g0229000 // Os05g0127500 // Os12g0434400 // Os10g0101200 // Os02g0720900 // Os07g0622000 // Os12g0583300
GO:0016740	F	transferase activity	108	7162	35698	1	1	// Os01g0734600 // Os02g0168800 // Os04g0556400 // Os02g0126400 // Os04g0624600 // Os07g0179300 // Os11g0102200 // Os11g0516000 // Os04g0320700 // Os04g0169100 // Os03g0285800 // Os08g0237000 // Os01g0127700 // Os07g0687900 // Os04g0196200 // Os08g0498400 // Os03g0316200 // Os01g0858900 // Os07g0424400 // Os02g0488600 // Os06g0288100 // Os06g0697000 // Os03g0184300 // Os02g0787300 // Os09g0418000…
GO:0046983	F	protein dimerization activity	9	891	35698	1	1	// Os04g0196200 // Os05g0178600 // Os09g0474000 // Os10g0569800 // Os02g0203000 // Os01g0178500 // Os03g0563400 // Os04g0637000 // Os08g0157500
GO:0005515	F	protein binding	71	7387	35698	1	1	// Os12g0556200 // Os02g0526400 // Os03g0661800 // Os01g0101700 // Os03g0180900 // Os02g0437200 // Os08g0174700 // Os12g0514500 // Os03g0807400 // Os02g0682300 // Os11g0582100 // Os11g0588400 // Os11g0216100 // Os03g0859700 // Os11g0605100 // Os02g0681200 // Os01g0719100 // Os08g0157500 // Os12g0147800 // Os04g0549600 // Os01g0606900 // Os01g0730500 // Os10g0569800 // Os11g0615800 // Os04g0444900…
GO:0005488	F	binding	390	21832	35698	1	1	// Os03g0189400 // Os02g0255700 // Os01g0940800 // Os07g0112800 // Os06g0683400 // Os08g0557600 // Os01g0949500 // Os04g0169100 // Os03g0285800 // Os04g0403200 // Os10g0109300 // Os07g0173700 // Os02g0187800 // Os12g0104800 // Os09g0418000 // Os06g0663200 // Os11g0664500 // Os11g0670900 // Os07g0677500 // Os05g0427100 // Os07g0543300 // Os01g0524700 // Os01g0862800 // Os03g0165900 // Os06g0340200…
GO:0004175	F	endopeptidase activity	11	871	35698	1	1	// Os03g0119300 // Os04g0561500 // Os10g0524600 // Os10g0537800 // Os04g0430700 // Os09g0564000 // Os03g0388900 // Os06g0229000 // Os02g0720900 // Os07g0622000 // Os12g0583300
GO:0003676	F	nucleic acid binding	77	9231	35698	1	1	// Os05g0525900 // Os03g0133000 // Os07g0683200 // Os04g0684900 // Os02g0140500 // Os11g0615800 // Os10g0376900 // Os03g0177500 // Os09g0538000 // Os01g0678600 // Os06g0348800 // Os02g0203000 // Os05g0322900 // Os02g0720900 // Os01g0896700 // Os06g0661800 // Os01g0821600 // Os01g0863300 // Os03g0108600 // Os01g0841800 // Os09g0417800 // Os01g0975300 // Os03g0799000 // Os09g0268600 // Os05g0343400…
GO:1901363	F	heterocyclic compound binding	209	13828	35698	1	1	// Os08g0507100 // Os01g0310500 // Os10g0512400 // Os06g0727200 // Os06g0102100 // Os08g0504700 // Os02g0126400 // Os01g0805900 // Os07g0112800 // Os01g0290800 // Os06g0229000 // Os02g0240300 // Os11g0102200 // Os02g0601300 // Os02g0157700 // Os04g0650800 // Os08g0557600 // Os04g0169100 // Os01g0975300 // Os08g0487800 // Os03g0285800 // Os03g0799000 // Os01g0127700 // Os06g0547400 // Os07g0677100…
GO:0046872	F	metal ion binding	116	6199	35698	1	1	// Os03g0189400 // Os12g0207600 // Os01g0149800 // Os09g0418000 // Os02g0126400 // Os02g0532500 // Os06g0229000 // Os04g0447100 // Os02g0240300 // Os01g0719100 // Os06g0683400 // Os08g0482600 // Os01g0949500 // Os03g0807400 // Os04g0403200 // Os07g0677100 // Os01g0974200 // Os07g0424400 // Os10g0109300 // Os03g0302200 // Os03g0235000 // Os02g0187800 // Os08g0504700 // Os03g0711100 // Os07g0677500…
GO:0008270	F	zinc ion binding	39	4071	35698	1	1	// Os03g0189400 // Os05g0525900 // Os02g0178100 // Os10g0572500 // Os01g0148000 // Os11g0582100 // Os06g0229000 // Os10g0159800 // Os02g0681200 // Os01g0719100 // Os03g0764100 // Os11g0210300 // Os04g0444900 // Os10g0430200 // Os04g0403200 // Os11g0210500 // Os04g0372700 // Os09g0268600 // Os02g0775600 // Os01g0672400 // Os02g0140500 // Os07g0424400 // Os03g0218300 // Os09g0247700 // Os04g0497000…
GO:0097159	F	organic cyclic compound binding	209	13836	35698	1	1	// Os08g0507100 // Os01g0310500 // Os10g0512400 // Os06g0727200 // Os06g0102100 // Os08g0504700 // Os02g0126400 // Os01g0805900 // Os07g0112800 // Os01g0290800 // Os06g0229000 // Os02g0240300 // Os11g0102200 // Os02g0601300 // Os02g0157700 // Os04g0650800 // Os08g0557600 // Os04g0169100 // Os01g0975300 // Os08g0487800 // Os03g0285800 // Os03g0799000 // Os01g0127700 // Os06g0547400 // Os07g0677100…
GO:0008233	F	peptidase activity	24	1682	35698	1	1	// Os03g0119300 // Os03g0151800 // Os03g0823400 // Os06g0720700 // Os03g0388900 // Os06g0229000 // Os10g0101200 // Os02g0720900 // Os03g0103200 // Os02g0771600 // Os04g0581100 // Os09g0564000 // Os03g0365200 // Os12g0583300 // Os04g0561500 // Os10g0524600 // Os07g0524900 // Os05g0127500 // Os07g0622000 // Os04g0430700 // Os10g0537800 // Os06g0647400 // Os10g0505700 // Os12g0434400
GO:0043167	F	ion binding	140	8930	35698	1	1	// Os03g0189400 // Os12g0207600 // Os01g0149800 // Os01g0940800 // Os08g0504700 // Os02g0126400 // Os02g0532500 // Os06g0229000 // Os04g0447100 // Os02g0240300 // Os01g0719100 // Os10g0517500 // Os06g0683400 // Os01g0717400 // Os08g0482600 // Os04g0650800 // Os11g0516000 // Os01g0949500 // Os03g0807400 // Os04g0403200 // Os07g0677100 // Os01g0974200 // Os07g0424400 // Os05g0375400 // Os10g0109300…
GO:0043169	F	cation binding	128	6210	35698	1	1	// Os03g0189400 // Os12g0207600 // Os01g0149800 // Os01g0940800 // Os08g0504700 // Os02g0126400 // Os02g0532500 // Os06g0229000 // Os04g0447100 // Os02g0240300 // Os01g0719100 // Os06g0683400 // Os08g0482600 // Os01g0949500 // Os03g0807400 // Os04g0403200 // Os07g0677100 // Os01g0974200 // Os07g0424400 // Os05g0375400 // Os10g0109300 // Os03g0302200 // Os03g0235000 // Os02g0187800 // Os09g0418000…
GO:0003723	F	RNA binding	19	3492	35698	1	1	// Os01g0678600 // Os05g0311500 // Os01g0841800 // Os10g0559700 // Os01g0794500 // Os09g0538000 // Os01g0896800 // Os03g0108600 // Os07g0173700 // Os01g0901900 // Os07g0112800 // Os11g0672300 // Os03g0177500 // Os09g0537700 // Os01g0896700 // Os12g0541500 // Os03g0196800 // Os04g0691600 // Os02g0274100
GO:0046914	F	transition metal ion binding	63	4952	35698	1	1	// Os03g0189400 // Os05g0525900 // Os02g0178100 // Os02g0140500 // Os04g0476100 // Os01g0148000 // Os02g0532500 // Os02g0775600 // Os01g0292200 // Os06g0229000 // Os09g0486500 // Os04g0447100 // Os10g0159800 // Os02g0681200 // Os03g0122300 // Os02g0682300 // Os11g0210300 // Os02g0771600 // Os08g0482600 // Os08g0508800 // Os01g0719100 // Os04g0581100 // Os10g0430200 // Os02g0194700 // Os04g0403200…
GO:0043168	F	anion binding	12	2918	35698	1	1	// Os08g0465800 // Os04g0650800 // Os11g0516000 // Os01g0760600 // Os08g0447000 // Os05g0105000 // Os06g0149900 // Os03g0157900 // Os03g0643300 // Os10g0517500 // Os01g0770200 // Os01g0717400
GO:0044422	C	organelle part	25	3383	35698	1	1	// Os02g0802700 // Os06g0229000 // Os02g0741500 // Os08g0215200 // Os04g0169100 // Os12g0575000 // Os03g0799000 // Os01g0858900 // Os12g0291100 // Os03g0196800 // Os10g0356000 // Os01g0975900 // Os07g0574800 // Os12g0104800 // Os01g0911200 // Os01g0805900 // Os07g0134800 // Os04g0429600 // Os09g0454600 // Os06g0671900 // Os05g0560000 // Os03g0219900 // Os12g0291400 // Os06g0731800 // Os02g0274100
GO:0071944	C	cell periphery	25	2158	35698	1	1	// Os09g0347300 // Os03g0159900 // Os01g0186900 // Os01g0108000 // Os06g0251100 // Os08g0237000 // Os02g0437200 // Os01g0305200 // Os07g0424400 // Os03g0170900 // Os01g0833400 // Os01g0905300 // Os01g0841700 // Os06g0697000 // Os02g0823100 // Os01g0905200 // Os12g0104800 // Os01g0823700 // Os01g0582600 // Os05g0473500 // Os10g0450900 // Os04g0435500 // Os07g0635900 // Os06g0731800 // Os05g0342000
GO:0009579	C	thylakoid	5	587	35698	1	1	// Os12g0575000 // Os05g0560000 // Os07g0147500 // Os06g0229000 // Os07g0147900
GO:0044435	C	plastid part	7	1270	35698	1	1	// Os02g0802700 // Os12g0575000 // Os05g0560000 // Os06g0229000 // Os12g0291100 // Os12g0291400 // Os10g0356000
GO:0044434	C	chloroplast part	7	1238	35698	1	1	// Os02g0802700 // Os12g0575000 // Os05g0560000 // Os06g0229000 // Os12g0291100 // Os12g0291400 // Os10g0356000
GO:0031090	C	organelle membrane	8	1035	35698	1	1	// Os02g0802700 // Os01g0975900 // Os06g0731800 // Os04g0429600 // Os09g0454600 // Os12g0104800 // Os01g0858900 // Os07g0134800
GO:0009507	C	chloroplast	25	2119	35698	1	1	// Os02g0802700 // Os12g0207600 // Os06g0229000 // Os12g0274700 // Os06g0661800 // Os08g0422000 // Os01g0186900 // Os08g0508800 // Os01g0582600 // Os12g0575000 // Os12g0291100 // Os01g0600900 // Os04g0691600 // Os08g0509100 // Os09g0346500 // Os02g0437200 // Os01g0720500 // Os01g0833400 // Os07g0147900 // Os04g0457000 // Os11g0572700 // Os05g0560000 // Os10g0356000 // Os12g0291400 // Os01g0747300
GO:0031975	C	envelope	5	904	35698	1	1	// Os02g0802700 // Os09g0454600 // Os02g0741500 // Os04g0227500 // Os07g0134800
GO:0012505	C	endomembrane system	11	1279	35698	1	1	// Os09g0497400 // Os03g0784600 // Os04g0169100 // Os03g0807400 // Os04g0429600 // Os12g0104800 // Os01g0858900 // Os02g0741500 // Os06g0731800 // Os01g0911200 // Os07g0147800
GO:0044446	C	intracellular organelle part	25	3366	35698	1	1	// Os02g0802700 // Os06g0229000 // Os02g0741500 // Os08g0215200 // Os04g0169100 // Os12g0575000 // Os03g0799000 // Os01g0858900 // Os12g0291100 // Os03g0196800 // Os10g0356000 // Os01g0975900 // Os07g0574800 // Os12g0104800 // Os01g0911200 // Os01g0805900 // Os07g0134800 // Os04g0429600 // Os09g0454600 // Os06g0671900 // Os05g0560000 // Os03g0219900 // Os12g0291400 // Os06g0731800 // Os02g0274100
GO:0098588	C	bounding membrane of organelle	5	765	35698	1	1	// Os04g0429600 // Os01g0975900 // Os06g0731800 // Os12g0104800 // Os01g0858900
GO:0005794	C	Golgi apparatus	6	702	35698	1	1	// Os03g0784600 // Os04g0429600 // Os12g0104800 // Os01g0858900 // Os06g0731800 // Os07g0147800
GO:0005886	C	plasma membrane	18	1697	35698	1	1	// Os02g0437200 // Os01g0305200 // Os03g0159900 // Os01g0108000 // Os07g0424400 // Os03g0170900 // Os04g0435500 // Os01g0833400 // Os01g0186900 // Os01g0841700 // Os06g0251100 // Os02g0823100 // Os12g0104800 // Os01g0823700 // Os07g0635900 // Os06g0731800 // Os05g0342000 // Os01g0582600

## Sheet: S6
Table S6. Significantly enriched GO terms between CBB23 and JG30 (FDR value ≤ 0.05).
C0 vs J0
GO accessions	term type	Term	query item	background item	background total	pvalue	FDR	entries
GO:0043231	C	intracellular membrane-bounded organelle	65	15750	35698	3.4e-05	0.00041	// Os01g0108400 // Os04g0400000 // Os04g0412000 // Os01g0259900 // Os06g0102100 // Os03g0661800 // Os11g0256900 // Os02g0140400 // Os11g0582700 // Os11g0615900 // Os01g0635200 // Os11g0588400 // Os05g0124000 // Os02g0240300 // Os11g0605100 // Os05g0322900 // Os03g0348200 // Os12g0274700 // Os07g0677200 // Os01g0717400 // Os03g0103200 // Os05g0132100 // Os02g0148000 // Os06g0289900 // Os07g0147500…
GO:0043229	C	intracellular organelle	66	16138	35698	3.7e-05	0.00041	// Os01g0108400 // Os04g0400000 // Os04g0412000 // Os01g0259900 // Os06g0102100 // Os03g0661800 // Os11g0256900 // Os02g0140400 // Os11g0582700 // Os11g0615900 // Os01g0635200 // Os11g0588400 // Os05g0124000 // Os02g0240300 // Os11g0605100 // Os05g0322900 // Os03g0348200 // Os12g0274700 // Os07g0677200 // Os01g0717400 // Os03g0103200 // Os05g0132100 // Os02g0148000 // Os06g0289900 // Os07g0147500…
GO:0005622	C	intracellular	69	17282	35698	4.2e-05	0.00041	// Os01g0108400 // Os04g0400000 // Os04g0412000 // Os01g0259900 // Os06g0102100 // Os11g0615800 // Os10g0430200 // Os02g0140400 // Os11g0582700 // Os11g0615900 // Os01g0635200 // Os11g0588400 // Os05g0124000 // Os02g0240300 // Os11g0605100 // Os05g0322900 // Os03g0348200 // Os12g0274700 // Os07g0677200 // Os01g0717400 // Os03g0103200 // Os05g0132100 // Os02g0148000 // Os03g0843800 // Os07g0147500…
GO:0043227	C	membrane-bounded organelle	65	15756	35698	3.5e-05	0.00041	// Os01g0108400 // Os04g0400000 // Os04g0412000 // Os01g0259900 // Os06g0102100 // Os03g0661800 // Os11g0256900 // Os02g0140400 // Os11g0582700 // Os11g0615900 // Os01g0635200 // Os11g0588400 // Os05g0124000 // Os02g0240300 // Os11g0605100 // Os05g0322900 // Os03g0348200 // Os12g0274700 // Os07g0677200 // Os01g0717400 // Os03g0103200 // Os05g0132100 // Os02g0148000 // Os06g0289900 // Os07g0147500…
GO:0044464	C	cell part	71	17860	35698	2.9e-05	0.00041	// Os01g0108400 // Os04g0400000 // Os04g0412000 // Os01g0259900 // Os06g0102100 // Os11g0615800 // Os10g0430200 // Os02g0140400 // Os11g0582700 // Os11g0615900 // Os01g0635200 // Os11g0588400 // Os05g0124000 // Os02g0240300 // Os11g0605100 // Os05g0322900 // Os03g0348200 // Os12g0274700 // Os07g0677200 // Os01g0717400 // Os03g0103200 // Os05g0132100 // Os02g0148000 // Os03g0843800 // Os07g0147500…
GO:0005623	C	cell	71	17860	35698	2.9e-05	0.00041	// Os01g0108400 // Os04g0400000 // Os04g0412000 // Os01g0259900 // Os06g0102100 // Os11g0615800 // Os10g0430200 // Os02g0140400 // Os11g0582700 // Os11g0615900 // Os01g0635200 // Os11g0588400 // Os05g0124000 // Os02g0240300 // Os11g0605100 // Os05g0322900 // Os03g0348200 // Os12g0274700 // Os07g0677200 // Os01g0717400 // Os03g0103200 // Os05g0132100 // Os02g0148000 // Os03g0843800 // Os07g0147500…
GO:0043226	C	organelle	66	16144	35698	3.8e-05	0.00041	// Os01g0108400 // Os04g0400000 // Os04g0412000 // Os01g0259900 // Os06g0102100 // Os03g0661800 // Os11g0256900 // Os02g0140400 // Os11g0582700 // Os11g0615900 // Os01g0635200 // Os11g0588400 // Os05g0124000 // Os02g0240300 // Os11g0605100 // Os05g0322900 // Os03g0348200 // Os12g0274700 // Os07g0677200 // Os01g0717400 // Os03g0103200 // Os05g0132100 // Os02g0148000 // Os06g0289900 // Os07g0147500…
GO:0044424	C	intracellular part	68	17108	35698	6.6e-05	0.00056	// Os01g0108400 // Os04g0400000 // Os04g0412000 // Os01g0259900 // Os06g0102100 // Os03g0661800 // Os10g0430200 // Os02g0140400 // Os11g0582700 // Os11g0615900 // Os01g0635200 // Os11g0588400 // Os05g0124000 // Os02g0240300 // Os11g0605100 // Os05g0322900 // Os03g0348200 // Os12g0274700 // Os07g0677200 // Os01g0717400 // Os03g0103200 // Os05g0132100 // Os02g0148000 // Os03g0843800 // Os07g0147500…
GO:0005737	C	cytoplasm	62	15256	35698	0.00013	0.00094	// Os04g0400000 // Os04g0412000 // Os01g0259900 // Os06g0102100 // Os03g0661800 // Os10g0430200 // Os02g0140400 // Os11g0582700 // Os11g0615900 // Os01g0635200 // Os11g0588400 // Os05g0124000 // Os02g0240300 // Os11g0605100 // Os07g0677200 // Os03g0348200 // Os12g0274700 // Os01g0717400 // Os03g0103200 // Os05g0132100 // Os02g0148000 // Os03g0843800 // Os07g0147500 // Os04g0518400 // Os11g0545300…
GO:0044444	C	cytoplasmic part	60	14862	35698	0.00024	0.0016	// Os04g0400000 // Os04g0412000 // Os01g0259900 // Os06g0102100 // Os03g0661800 // Os11g0256900 // Os02g0140400 // Os11g0582700 // Os11g0615900 // Os01g0635200 // Os11g0588400 // Os05g0124000 // Os02g0240300 // Os11g0605100 // Os07g0677200 // Os03g0348200 // Os12g0274700 // Os01g0717400 // Os03g0103200 // Os05g0132100 // Os02g0148000 // Os06g0289900 // Os07g0147500 // Os10g0430200 // Os11g0545300…
GO:0004497	F	monooxygenase activity	5	152	35698	8.6e-05	0.0065	// Os05g0101600 // Os06g0102100 // Os10g0320100 // Os12g0274700 // Os05g0320700
GO:0009055	F	electron carrier activity	6	230	35698	5.8e-05	0.0065	// Os06g0102100 // Os05g0320700 // Os05g0101600 // Os10g0320100 // Os02g0240300 // Os07g0677200
GO:0005739	C	mitochondrion	20	4111	35698	0.011	0.066	// Os04g0400000 // Os02g0460200 // Os04g0402700 // Os08g0478700 // Os02g0157600 // Os11g0582700 // Os05g0124000 // Os09g0337500 // Os10g0430200 // Os10g0376200 // Os03g0661800 // Os01g0635200 // Os02g0140400 // Os04g0282400 // Os11g0545300 // Os11g0584100 // Os11g0605100 // Os11g0518900 // Os02g0589000 // Os02g0138600
CBB23-12 hpi vs. JG30-12 hpi
GO accessions	term type	Term	query item	background item	background total	pvalue	FDR	entries
GO:0043229	C	intracellular organelle	276	16138	35698	2e-27	1.6e-25	// Os12g0231000 // Os05g0136900 // Os03g0119300 // Os05g0526200 // Os06g0196900 // Os03g0593200 // Os03g0741100 // Os08g0422600 // Os02g0741500 // Os02g0194700 // Os11g0615900 // Os07g0574800 // Os04g0624600 // Os04g0400000 // Os06g0348800 // Os04g0447100 // Os01g0719100 // Os02g0138600 // Os03g0621400 // Os04g0301500 // Os01g0769900 // Os08g0215200 // Os04g0320700 // Os09g0538000 // Os03g0425000…
GO:0043226	C	organelle	276	16144	35698	2.2e-27	1.6e-25	// Os12g0231000 // Os05g0136900 // Os03g0119300 // Os05g0526200 // Os06g0196900 // Os03g0593200 // Os03g0741100 // Os08g0422600 // Os02g0741500 // Os02g0194700 // Os11g0615900 // Os07g0574800 // Os04g0624600 // Os04g0400000 // Os06g0348800 // Os04g0447100 // Os01g0719100 // Os02g0138600 // Os03g0621400 // Os04g0301500 // Os01g0769900 // Os08g0215200 // Os04g0320700 // Os09g0538000 // Os03g0425000…
GO:0043231	C	intracellular membrane-bounded organelle	270	15750	35698	2.2e-26	8.8e-25	// Os12g0231000 // Os05g0136900 // Os03g0119300 // Os05g0526200 // Os06g0196900 // Os03g0593200 // Os03g0741100 // Os08g0422600 // Os02g0194700 // Os11g0615900 // Os04g0624600 // Os04g0400000 // Os06g0348800 // Os04g0447100 // Os01g0719100 // Os02g0138600 // Os03g0621400 // Os04g0301500 // Os01g0769900 // Os08g0215200 // Os04g0320700 // Os09g0538000 // Os01g0949500 // Os07g0142100 // Os03g0807400…
GO:0043227	C	membrane-bounded organelle	270	15756	35698	2.3e-26	8.8e-25	// Os12g0231000 // Os05g0136900 // Os03g0119300 // Os05g0526200 // Os06g0196900 // Os03g0593200 // Os03g0741100 // Os08g0422600 // Os02g0194700 // Os11g0615900 // Os04g0624600 // Os04g0400000 // Os06g0348800 // Os04g0447100 // Os01g0719100 // Os02g0138600 // Os03g0621400 // Os04g0301500 // Os01g0769900 // Os08g0215200 // Os04g0320700 // Os09g0538000 // Os01g0949500 // Os07g0142100 // Os03g0807400…
GO:0005622	C	intracellular	280	17282	35698	8.5e-24	2.6e-22	// Os12g0231000 // Os05g0136900 // Os03g0119300 // Os05g0526200 // Os06g0196900 // Os03g0593200 // Os03g0741100 // Os08g0422600 // Os02g0741500 // Os02g0194700 // Os11g0615900 // Os07g0574800 // Os04g0624600 // Os04g0400000 // Os06g0348800 // Os04g0447100 // Os01g0719100 // Os02g0138600 // Os03g0621400 // Os04g0301500 // Os01g0769900 // Os08g0215200 // Os04g0320700 // Os09g0538000 // Os03g0425000…
GO:0044424	C	intracellular part	278	17108	35698	1.2e-23	2.9e-22	// Os12g0231000 // Os05g0136900 // Os03g0119300 // Os05g0526200 // Os06g0196900 // Os03g0593200 // Os03g0741100 // Os08g0422600 // Os02g0741500 // Os02g0194700 // Os11g0615900 // Os07g0574800 // Os04g0624600 // Os04g0400000 // Os06g0348800 // Os04g0447100 // Os01g0719100 // Os02g0138600 // Os03g0621400 // Os04g0301500 // Os01g0769900 // Os08g0215200 // Os04g0320700 // Os09g0538000 // Os03g0425000…
GO:0044464	C	cell part	282	17860	35698	4.3e-22	8.1e-21	// Os12g0231000 // Os05g0136900 // Os03g0119300 // Os05g0526200 // Os06g0196900 // Os03g0593200 // Os03g0741100 // Os08g0422600 // Os02g0741500 // Os02g0194700 // Os11g0615900 // Os07g0574800 // Os04g0624600 // Os04g0400000 // Os06g0348800 // Os04g0447100 // Os01g0719100 // Os02g0138600 // Os03g0621400 // Os04g0301500 // Os01g0769900 // Os08g0215200 // Os04g0320700 // Os09g0538000 // Os03g0425000…
GO:0005623	C	cell	282	17860	35698	4.3e-22	8.1e-21	// Os12g0231000 // Os05g0136900 // Os03g0119300 // Os05g0526200 // Os06g0196900 // Os03g0593200 // Os03g0741100 // Os08g0422600 // Os02g0741500 // Os02g0194700 // Os11g0615900 // Os07g0574800 // Os04g0624600 // Os04g0400000 // Os06g0348800 // Os04g0447100 // Os01g0719100 // Os02g0138600 // Os03g0621400 // Os04g0301500 // Os01g0769900 // Os08g0215200 // Os04g0320700 // Os09g0538000 // Os03g0425000…
GO:0044444	C	cytoplasmic part	246	14862	35698	9.5e-20	1.6e-18	// Os12g0231000 // Os05g0136900 // Os03g0119300 // Os05g0526200 // Os03g0593200 // Os11g0116000 // Os08g0422600 // Os02g0194700 // Os04g0624600 // Os04g0400000 // Os11g0615900 // Os04g0447100 // Os01g0719100 // Os02g0138600 // Os03g0621400 // Os01g0769900 // Os04g0320700 // Os09g0538000 // Os03g0425000 // Os01g0949500 // Os07g0142100 // Os03g0807400 // Os11g0545300 // Os04g0586500 // Os07g0227800…
GO:0005737	C	cytoplasm	247	15256	35698	1.9e-18	2.8e-17	// Os12g0231000 // Os05g0136900 // Os03g0119300 // Os05g0526200 // Os03g0593200 // Os11g0116000 // Os08g0422600 // Os02g0194700 // Os04g0624600 // Os04g0400000 // Os11g0615900 // Os04g0447100 // Os01g0719100 // Os02g0138600 // Os03g0621400 // Os01g0769900 // Os04g0320700 // Os09g0538000 // Os03g0425000 // Os01g0949500 // Os07g0142100 // Os03g0807400 // Os11g0545300 // Os04g0586500 // Os07g0227800…
GO:0009536	C	plastid	95	5008	35698	1.1e-08	1.5e-07	// Os05g0526200 // Os03g0593200 // Os08g0422600 // Os04g0624600 // Os04g0447100 // Os01g0769900 // Os08g0487800 // Os01g0783100 // Os05g0574800 // Os10g0508700 // Os06g0649000 // Os03g0597200 // Os12g0406000 // Os03g0796600 // Os01g0524700 // Os02g0797600 // Os07g0178700 // Os03g0284900 // Os03g0371300 // Os09g0442100 // Os09g0522000 // Os01g0582600 // Os06g0289900 // Os01g0256500 // Os03g0862100…
GO:0009055	F	electron carrier activity	17	230	35698	1.4e-09	4.9e-07	// Os05g0101600 // Os03g0850900 // Os08g0482600 // Os08g0508800 // Os07g0677100 // Os02g0194700 // Os10g0109300 // Os11g0635500 // Os03g0223100 // Os03g0235000 // Os06g0547400 // Os03g0371300 // Os01g0667900 // Os04g0447100 // Os02g0817900 // Os07g0677200 // Os03g0709300
GO:0016023	C	cytoplasmic, membrane-bounded vesicle	80	4437	35698	1.7e-06	1.8e-05	// Os05g0136900 // Os03g0119300 // Os05g0160300 // Os01g0667900 // Os04g0685300 // Os03g0101700 // Os09g0472900 // Os11g0116000 // Os11g0598500 // Os07g0677100 // Os01g0717400 // Os07g0677200 // Os02g0326700 // Os05g0103400 // Os02g0681200 // Os12g0147800 // Os11g0214900 // Os03g0668000 // Os05g0101600 // Os01g0357900 // Os08g0482600 // Os02g0720900 // Os12g0150200 // Os09g0538000 // Os12g0115300…
GO:0097708	C	intracellular vesicle	80	4437	35698	1.7e-06	1.8e-05	// Os05g0136900 // Os03g0119300 // Os05g0160300 // Os01g0667900 // Os04g0685300 // Os03g0101700 // Os09g0472900 // Os11g0116000 // Os11g0598500 // Os07g0677100 // Os01g0717400 // Os07g0677200 // Os02g0326700 // Os05g0103400 // Os02g0681200 // Os12g0147800 // Os11g0214900 // Os03g0668000 // Os05g0101600 // Os01g0357900 // Os08g0482600 // Os02g0720900 // Os12g0150200 // Os09g0538000 // Os12g0115300…
GO:0031988	C	membrane-bounded vesicle	80	4445	35698	1.8e-06	1.8e-05	// Os05g0136900 // Os03g0119300 // Os05g0160300 // Os01g0667900 // Os04g0685300 // Os03g0101700 // Os09g0472900 // Os11g0116000 // Os11g0598500 // Os07g0677100 // Os01g0717400 // Os07g0677200 // Os02g0326700 // Os05g0103400 // Os02g0681200 // Os12g0147800 // Os11g0214900 // Os03g0668000 // Os05g0101600 // Os01g0357900 // Os08g0482600 // Os02g0720900 // Os12g0150200 // Os09g0538000 // Os12g0115300…
GO:0031410	C	cytoplasmic vesicle	80	4437	35698	1.7e-06	1.8e-05	// Os05g0136900 // Os03g0119300 // Os05g0160300 // Os01g0667900 // Os04g0685300 // Os03g0101700 // Os09g0472900 // Os11g0116000 // Os11g0598500 // Os07g0677100 // Os01g0717400 // Os07g0677200 // Os02g0326700 // Os05g0103400 // Os02g0681200 // Os12g0147800 // Os11g0214900 // Os03g0668000 // Os05g0101600 // Os01g0357900 // Os08g0482600 // Os02g0720900 // Os12g0150200 // Os09g0538000 // Os12g0115300…
GO:0031982	C	vesicle	80	4455	35698	2e-06	1.9e-05	// Os05g0136900 // Os03g0119300 // Os05g0160300 // Os01g0667900 // Os04g0685300 // Os03g0101700 // Os09g0472900 // Os11g0116000 // Os11g0598500 // Os07g0677100 // Os01g0717400 // Os07g0677200 // Os02g0326700 // Os05g0103400 // Os02g0681200 // Os12g0147800 // Os11g0214900 // Os03g0668000 // Os05g0101600 // Os01g0357900 // Os08g0482600 // Os02g0720900 // Os12g0150200 // Os09g0538000 // Os12g0115300…
GO:0005509	F	calcium ion binding	15	365	35698	1.4e-05	0.0026	// Os07g0677100 // Os10g0180800 // Os04g0492800 // Os10g0109300 // Os03g0807400 // Os02g0126400 // Os01g0949300 // Os01g0949500 // Os01g0135700 // Os06g0547400 // Os03g0235000 // Os05g0382600 // Os07g0677200 // Os06g0254700 // Os06g0683400
GO:0005739	C	mitochondrion	65	4111	35698	0.00079	0.007	// Os12g0231000 // Os11g0679700 // Os06g0281400 // Os05g0520600 // Os03g0241900 // Os06g0255400 // Os03g0661800 // Os12g0102600 // Os07g0164000 // Os01g0507700 // Os01g0618400 // Os09g0556500 // Os05g0124000 // Os11g0605100 // Os01g0151200 // Os12g0489100 // Os06g0661800 // Os05g0566400 // Os01g0606900 // Os04g0320700 // Os02g0157600 // Os01g0719100 // Os09g0379900 // Os01g0949500 // Os07g0142100…
CBB23-24 hpi vs. JG30-24 hpi
GO accessions	term type	Term	query item	background item	background total	pvalue	FDR	entries
GO:0043231	C	intracellular membrane-bounded organelle	181	15750	35698	2.2e-16	1.4e-14	// Os01g0108400 // Os03g0119300 // Os05g0102000 // Os01g0733500 // Os01g0667900 // Os03g0823400 // Os06g0102100 // Os05g0582300 // Os05g0119300 // Os02g0677300 // Os02g0140400 // Os07g0179300 // Os06g0260000 // Os06g0717100 // Os10g0512400 // Os01g0719100 // Os04g0301500 // Os09g0497400 // Os01g0949500 // Os07g0605400 // Os11g0545300 // Os04g0586500 // Os03g0285800 // Os03g0799000 // Os08g0422600…
GO:0043227	C	membrane-bounded organelle	181	15756	35698	2.3e-16	1.4e-14	// Os01g0108400 // Os03g0119300 // Os05g0102000 // Os01g0733500 // Os01g0667900 // Os03g0823400 // Os06g0102100 // Os05g0582300 // Os05g0119300 // Os02g0677300 // Os02g0140400 // Os07g0179300 // Os06g0260000 // Os06g0717100 // Os10g0512400 // Os01g0719100 // Os04g0301500 // Os09g0497400 // Os01g0949500 // Os07g0605400 // Os11g0545300 // Os04g0586500 // Os03g0285800 // Os03g0799000 // Os08g0422600…
GO:0043229	C	intracellular organelle	181	16138	35698	3.7e-15	1.2e-13	// Os01g0108400 // Os03g0119300 // Os05g0102000 // Os01g0733500 // Os01g0667900 // Os03g0823400 // Os06g0102100 // Os05g0582300 // Os05g0119300 // Os02g0677300 // Os02g0140400 // Os07g0179300 // Os06g0260000 // Os06g0717100 // Os10g0512400 // Os01g0719100 // Os04g0301500 // Os09g0497400 // Os01g0949500 // Os07g0605400 // Os11g0545300 // Os04g0586500 // Os03g0285800 // Os03g0799000 // Os08g0422600…
GO:0043226	C	organelle	181	16144	35698	3.8e-15	1.2e-13	// Os01g0108400 // Os03g0119300 // Os05g0102000 // Os01g0733500 // Os01g0667900 // Os03g0823400 // Os06g0102100 // Os05g0582300 // Os05g0119300 // Os02g0677300 // Os02g0140400 // Os07g0179300 // Os06g0260000 // Os06g0717100 // Os10g0512400 // Os01g0719100 // Os04g0301500 // Os09g0497400 // Os01g0949500 // Os07g0605400 // Os11g0545300 // Os04g0586500 // Os03g0285800 // Os03g0799000 // Os08g0422600…
GO:0044424	C	intracellular part	186	17108	35698	2.2e-14	5.2e-13	// Os01g0108400 // Os03g0119300 // Os05g0102000 // Os01g0733500 // Os01g0667900 // Os03g0823400 // Os06g0102100 // Os05g0582300 // Os05g0119300 // Os02g0677300 // Os02g0140400 // Os07g0179300 // Os06g0260000 // Os06g0717100 // Os10g0512400 // Os01g0719100 // Os04g0301500 // Os09g0497400 // Os01g0949500 // Os04g0518400 // Os11g0545300 // Os04g0586500 // Os03g0285800 // Os03g0799000 // Os08g0422600…
GO:0005622	C	intracellular	187	17282	35698	2.7e-14	5.3e-13	// Os01g0108400 // Os03g0119300 // Os05g0102000 // Os01g0733500 // Os01g0667900 // Os03g0823400 // Os06g0102100 // Os05g0582300 // Os05g0119300 // Os02g0677300 // Os02g0140400 // Os07g0179300 // Os06g0260000 // Os06g0717100 // Os10g0512400 // Os01g0719100 // Os04g0301500 // Os09g0497400 // Os01g0949500 // Os04g0518400 // Os11g0545300 // Os04g0586500 // Os03g0285800 // Os03g0799000 // Os08g0422600…
GO:0044464	C	cell part	190	17860	35698	6.8e-14	1e-12	// Os01g0108400 // Os03g0119300 // Os05g0102000 // Os01g0733500 // Os01g0667900 // Os03g0823400 // Os06g0102100 // Os05g0582300 // Os05g0119300 // Os02g0677300 // Os02g0140400 // Os07g0179300 // Os06g0260000 // Os06g0717100 // Os10g0512400 // Os01g0719100 // Os04g0301500 // Os09g0497400 // Os01g0949500 // Os04g0518400 // Os11g0545300 // Os04g0586500 // Os06g0251100 // Os03g0285800 // Os03g0799000…
GO:0005623	C	cell	190	17860	35698	6.8e-14	1e-12	// Os01g0108400 // Os03g0119300 // Os05g0102000 // Os01g0733500 // Os01g0667900 // Os03g0823400 // Os06g0102100 // Os05g0582300 // Os05g0119300 // Os02g0677300 // Os02g0140400 // Os07g0179300 // Os06g0260000 // Os06g0717100 // Os10g0512400 // Os01g0719100 // Os04g0301500 // Os09g0497400 // Os01g0949500 // Os04g0518400 // Os11g0545300 // Os04g0586500 // Os06g0251100 // Os03g0285800 // Os03g0799000…
GO:0005737	C	cytoplasm	156	15256	35698	2.6e-08	3.5e-07	// Os03g0119300 // Os05g0102000 // Os01g0733500 // Os01g0667900 // Os03g0823400 // Os06g0102100 // Os05g0582300 // Os05g0119300 // Os02g0140400 // Os07g0179300 // Os06g0260000 // Os06g0717100 // Os10g0512400 // Os01g0719100 // Os09g0497400 // Os01g0949500 // Os04g0518400 // Os11g0545300 // Os04g0586500 // Os03g0285800 // Os08g0422600 // Os04g0196200 // Os01g0769700 // Os10g0524600 // Os04g0628100…
GO:0044444	C	cytoplasmic part	152	14862	35698	5.5e-08	6.6e-07	// Os03g0119300 // Os05g0102000 // Os01g0733500 // Os01g0667900 // Os03g0823400 // Os06g0102100 // Os05g0582300 // Os05g0119300 // Os02g0140400 // Os07g0179300 // Os06g0260000 // Os06g0717100 // Os10g0512400 // Os01g0719100 // Os09g0497400 // Os01g0949500 // Os07g0605400 // Os11g0545300 // Os04g0586500 // Os03g0285800 // Os08g0422600 // Os04g0196200 // Os01g0769700 // Os10g0524600 // Os04g0628100…
GO:0009055	F	electron carrier activity	13	230	35698	3.1e-08	7e-06	// Os10g0512400 // Os01g0667900 // Os06g0102100 // Os02g0569900 // Os05g0320700 // Os05g0101600 // Os10g0320100 // Os06g0547400 // Os11g0635500 // Os01g0963000 // Os01g0368900 // Os07g0677200 // Os07g0134800
GO:0005509	F	calcium ion binding	15	365	35698	1.5e-07	1.7e-05	// Os04g0598900 // Os10g0180800 // Os04g0492800 // Os03g0331700 // Os01g0949500 // Os01g0841700 // Os01g0135700 // Os06g0547400 // Os02g0126400 // Os01g0963000 // Os07g0681400 // Os07g0677200 // Os01g0949300 // Os06g0683400 // Os05g0223000
GO:0001071	F	nucleic acid binding transcription factor activity	19	803	35698	1.1e-05	0.0006	// Os09g0417600 // Os09g0522000 // Os02g0527300 // Os04g0605100 // Os01g0821600 // Os09g0522100 // Os05g0497300 // Os02g0677300 // Os04g0610400 // Os09g0334500 // Os06g0127100 // Os09g0522200 // Os04g0669200 // Os02g0181300 // Os05g0322900 // Os09g0457900 // Os08g0474000 // Os09g0417800 // Os02g0764700
GO:0003700	F	transcription factor activity, sequence-specific DNA binding	19	803	35698	1.1e-05	0.0006	// Os09g0417600 // Os09g0522000 // Os02g0527300 // Os04g0605100 // Os01g0821600 // Os09g0522100 // Os05g0497300 // Os02g0677300 // Os04g0610400 // Os09g0334500 // Os06g0127100 // Os09g0522200 // Os04g0669200 // Os02g0181300 // Os05g0322900 // Os09g0457900 // Os08g0474000 // Os09g0417800 // Os02g0764700
GO:0016023	C	cytoplasmic, membrane-bounded vesicle	53	4437	35698	0.00023	0.002	// Os04g0685300 // Os03g0119300 // Os05g0217800 // Os03g0823400 // Os06g0102100 // Os01g0769700 // Os11g0635500 // Os11g0588400 // Os07g0676900 // Os10g0512400 // Os07g0677200 // Os02g0739400 // Os01g0132000 // Os01g0357900 // Os03g0103200 // Os05g0550300 // Os07g0605400 // Os01g0940700 // Os04g0586500 // Os06g0547400 // Os09g0537700 // Os01g0858900 // Os04g0364800 // Os06g0573600 // Os07g0573900…
GO:0097708	C	intracellular vesicle	53	4437	35698	0.00023	0.002	// Os04g0685300 // Os03g0119300 // Os05g0217800 // Os03g0823400 // Os06g0102100 // Os01g0769700 // Os11g0635500 // Os11g0588400 // Os07g0676900 // Os10g0512400 // Os07g0677200 // Os02g0739400 // Os01g0132000 // Os01g0357900 // Os03g0103200 // Os05g0550300 // Os07g0605400 // Os01g0940700 // Os04g0586500 // Os06g0547400 // Os09g0537700 // Os01g0858900 // Os04g0364800 // Os06g0573600 // Os07g0573900…
GO:0031410	C	cytoplasmic vesicle	53	4437	35698	0.00023	0.002	// Os04g0685300 // Os03g0119300 // Os05g0217800 // Os03g0823400 // Os06g0102100 // Os01g0769700 // Os11g0635500 // Os11g0588400 // Os07g0676900 // Os10g0512400 // Os07g0677200 // Os02g0739400 // Os01g0132000 // Os01g0357900 // Os03g0103200 // Os05g0550300 // Os07g0605400 // Os01g0940700 // Os04g0586500 // Os06g0547400 // Os09g0537700 // Os01g0858900 // Os04g0364800 // Os06g0573600 // Os07g0573900…
GO:0031988	C	membrane-bounded vesicle	53	4445	35698	0.00024	0.002	// Os04g0685300 // Os03g0119300 // Os05g0217800 // Os03g0823400 // Os06g0102100 // Os01g0769700 // Os11g0635500 // Os11g0588400 // Os07g0676900 // Os10g0512400 // Os07g0677200 // Os02g0739400 // Os01g0132000 // Os01g0357900 // Os03g0103200 // Os05g0550300 // Os07g0605400 // Os01g0940700 // Os04g0586500 // Os06g0547400 // Os09g0537700 // Os01g0858900 // Os04g0364800 // Os06g0573600 // Os07g0573900…
GO:0031982	C	vesicle	53	4455	35698	0.00025	0.002	// Os04g0685300 // Os03g0119300 // Os05g0217800 // Os03g0823400 // Os06g0102100 // Os01g0769700 // Os11g0635500 // Os11g0588400 // Os07g0676900 // Os10g0512400 // Os07g0677200 // Os02g0739400 // Os01g0132000 // Os01g0357900 // Os03g0103200 // Os05g0550300 // Os07g0605400 // Os01g0940700 // Os04g0586500 // Os06g0547400 // Os09g0537700 // Os01g0858900 // Os04g0364800 // Os06g0573600 // Os07g0573900…
GO:0005634	C	nucleus	36	2719	35698	0.00044	0.0033	// Os02g0673500 // Os01g0108400 // Os04g0610400 // Os05g0322900 // Os09g0457900 // Os01g0821600 // Os04g0301500 // Os09g0522000 // Os07g0583600 // Os02g0764700 // Os09g0522100 // Os05g0497300 // Os01g0975300 // Os09g0522200 // Os03g0181100 // Os03g0402800 // Os04g0669200 // Os02g0527300 // Os02g0181300 // Os06g0127100 // Os02g0677300 // Os09g0334500 // Os04g0684900 // Os02g0766700 // Os08g0544800…
GO:0004497	F	monooxygenase activity	7	152	35698	0.00017	0.0077	// Os10g0512400 // Os06g0102100 // Os02g0569900 // Os11g0635500 // Os05g0101600 // Os10g0320100 // Os05g0320700
GO:0009536	C	plastid	55	5008	35698	0.0013	0.0091	// Os09g0518000 // Os04g0685300 // Os05g0102000 // Os01g0733500 // Os04g0547900 // Os08g0422600 // Os05g0582300 // Os01g0588900 // Os02g0137700 // Os07g0179300 // Os03g0667100 // Os07g0681400 // Os03g0764100 // Os08g0232700 // Os09g0369400 // Os06g0661800 // Os09g0522000 // Os01g0186900 // Os01g0582600 // Os09g0522100 // Os02g0488600 // Os03g0171600 // Os08g0168000 // Os05g0391600 // Os07g0178800…
GO:2001141	P	regulation of RNA biosynthetic process	27	1632	35698	8.4e-05	0.012	// Os11g0143300 // Os07g0545800 // Os05g0322900 // Os09g0457900 // Os01g0821600 // Os09g0522000 // Os07g0583600 // Os02g0764700 // Os09g0522100 // Os05g0497300 // Os03g0181100 // Os03g0402800 // Os04g0669200 // Os02g0527300 // Os02g0181300 // Os06g0127100 // Os02g0677300 // Os09g0334500 // Os02g0766700 // Os08g0544800 // Os09g0417600 // Os12g0139400 // Os04g0610400 // Os09g0522200 // Os04g0605100…
GO:0006355	P	regulation of transcription, DNA-templated	27	1632	35698	8.4e-05	0.012	// Os11g0143300 // Os07g0545800 // Os05g0322900 // Os09g0457900 // Os01g0821600 // Os09g0522000 // Os07g0583600 // Os02g0764700 // Os09g0522100 // Os05g0497300 // Os03g0181100 // Os03g0402800 // Os04g0669200 // Os02g0527300 // Os02g0181300 // Os06g0127100 // Os02g0677300 // Os09g0334500 // Os02g0766700 // Os08g0544800 // Os09g0417600 // Os12g0139400 // Os04g0610400 // Os09g0522200 // Os04g0605100…
GO:1903506	P	regulation of nucleic acid-templated transcription	27	1632	35698	8.4e-05	0.012	// Os11g0143300 // Os07g0545800 // Os05g0322900 // Os09g0457900 // Os01g0821600 // Os09g0522000 // Os07g0583600 // Os02g0764700 // Os09g0522100 // Os05g0497300 // Os03g0181100 // Os03g0402800 // Os04g0669200 // Os02g0527300 // Os02g0181300 // Os06g0127100 // Os02g0677300 // Os09g0334500 // Os02g0766700 // Os08g0544800 // Os09g0417600 // Os12g0139400 // Os04g0610400 // Os09g0522200 // Os04g0605100…
GO:0051252	P	regulation of RNA metabolic process	27	1647	35698	9.7e-05	0.012	// Os11g0143300 // Os07g0545800 // Os05g0322900 // Os09g0457900 // Os01g0821600 // Os09g0522000 // Os07g0583600 // Os02g0764700 // Os09g0522100 // Os05g0497300 // Os03g0181100 // Os03g0402800 // Os04g0669200 // Os02g0527300 // Os02g0181300 // Os06g0127100 // Os02g0677300 // Os09g0334500 // Os02g0766700 // Os08g0544800 // Os09g0417600 // Os12g0139400 // Os04g0610400 // Os09g0522200 // Os04g0605100…
GO:0019219	P	regulation of nucleobase-containing compound metabolic process	27	1694	35698	0.00015	0.015	// Os11g0143300 // Os07g0545800 // Os05g0322900 // Os09g0457900 // Os01g0821600 // Os09g0522000 // Os07g0583600 // Os02g0764700 // Os09g0522100 // Os05g0497300 // Os03g0181100 // Os03g0402800 // Os04g0669200 // Os02g0527300 // Os02g0181300 // Os06g0127100 // Os02g0677300 // Os09g0334500 // Os02g0766700 // Os08g0544800 // Os09g0417600 // Os12g0139400 // Os04g0610400 // Os09g0522200 // Os04g0605100…
GO:0005739	C	mitochondrion	46	4111	35698	0.0024	0.016	// Os02g0673500 // Os02g0802700 // Os01g0892800 // Os01g0332100 // Os04g0605100 // Os02g0540700 // Os05g0119300 // Os07g0164000 // Os02g0140400 // Os11g0582100 // Os11g0605100 // Os01g0719100 // Os06g0661800 // Os05g0566400 // Os01g0672400 // Os02g0734300 // Os09g0497400 // Os01g0949500 // Os11g0545300 // Os03g0285800 // Os01g0947700 // Os09g0379900 // Os07g0134800 // Os01g0864500 // Os05g0223000…
GO:0010556	P	regulation of macromolecule biosynthetic process	27	1766	35698	0.00029	0.017	// Os11g0143300 // Os07g0545800 // Os05g0322900 // Os09g0457900 // Os01g0821600 // Os09g0522000 // Os07g0583600 // Os02g0764700 // Os09g0522100 // Os05g0497300 // Os03g0181100 // Os03g0402800 // Os04g0669200 // Os02g0527300 // Os02g0181300 // Os06g0127100 // Os02g0677300 // Os09g0334500 // Os02g0766700 // Os08g0544800 // Os09g0417600 // Os12g0139400 // Os04g0610400 // Os09g0522200 // Os04g0605100…
GO:2000112	P	regulation of cellular macromolecule biosynthetic process	27	1766	35698	0.00029	0.017	// Os11g0143300 // Os07g0545800 // Os05g0322900 // Os09g0457900 // Os01g0821600 // Os09g0522000 // Os07g0583600 // Os02g0764700 // Os09g0522100 // Os05g0497300 // Os03g0181100 // Os03g0402800 // Os04g0669200 // Os02g0527300 // Os02g0181300 // Os06g0127100 // Os02g0677300 // Os09g0334500 // Os02g0766700 // Os08g0544800 // Os09g0417600 // Os12g0139400 // Os04g0610400 // Os09g0522200 // Os04g0605100…
GO:0097659	P	nucleic acid-templated transcription	27	1784	35698	0.00034	0.017	// Os11g0143300 // Os07g0545800 // Os05g0322900 // Os09g0457900 // Os01g0821600 // Os09g0522000 // Os07g0583600 // Os02g0764700 // Os09g0522100 // Os05g0497300 // Os03g0181100 // Os03g0402800 // Os04g0669200 // Os02g0527300 // Os02g0181300 // Os06g0127100 // Os02g0677300 // Os09g0334500 // Os02g0766700 // Os08g0544800 // Os09g0417600 // Os12g0139400 // Os04g0610400 // Os09g0522200 // Os04g0605100…
GO:0006351	P	transcription, DNA-templated	27	1784	35698	0.00034	0.017	// Os11g0143300 // Os07g0545800 // Os05g0322900 // Os09g0457900 // Os01g0821600 // Os09g0522000 // Os07g0583600 // Os02g0764700 // Os09g0522100 // Os05g0497300 // Os03g0181100 // Os03g0402800 // Os04g0669200 // Os02g0527300 // Os02g0181300 // Os06g0127100 // Os02g0677300 // Os09g0334500 // Os02g0766700 // Os08g0544800 // Os09g0417600 // Os12g0139400 // Os04g0610400 // Os09g0522200 // Os04g0605100…
GO:0032774	P	RNA biosynthetic process	27	1786	35698	0.00035	0.017	// Os11g0143300 // Os07g0545800 // Os05g0322900 // Os09g0457900 // Os01g0821600 // Os09g0522000 // Os07g0583600 // Os02g0764700 // Os09g0522100 // Os05g0497300 // Os03g0181100 // Os03g0402800 // Os04g0669200 // Os02g0527300 // Os02g0181300 // Os06g0127100 // Os02g0677300 // Os09g0334500 // Os02g0766700 // Os08g0544800 // Os09g0417600 // Os12g0139400 // Os04g0610400 // Os09g0522200 // Os04g0605100…
GO:0031326	P	regulation of cellular biosynthetic process	27	1804	35698	0.00041	0.018	// Os11g0143300 // Os07g0545800 // Os05g0322900 // Os09g0457900 // Os01g0821600 // Os09g0522000 // Os07g0583600 // Os02g0764700 // Os09g0522100 // Os05g0497300 // Os03g0181100 // Os03g0402800 // Os04g0669200 // Os02g0527300 // Os02g0181300 // Os06g0127100 // Os02g0677300 // Os09g0334500 // Os02g0766700 // Os08g0544800 // Os09g0417600 // Os12g0139400 // Os04g0610400 // Os09g0522200 // Os04g0605100…
GO:0009889	P	regulation of biosynthetic process	27	1821	35698	0.00047	0.018	// Os11g0143300 // Os07g0545800 // Os05g0322900 // Os09g0457900 // Os01g0821600 // Os09g0522000 // Os07g0583600 // Os02g0764700 // Os09g0522100 // Os05g0497300 // Os03g0181100 // Os03g0402800 // Os04g0669200 // Os02g0527300 // Os02g0181300 // Os06g0127100 // Os02g0677300 // Os09g0334500 // Os02g0766700 // Os08g0544800 // Os09g0417600 // Os12g0139400 // Os04g0610400 // Os09g0522200 // Os04g0605100…
GO:0051171	P	regulation of nitrogen compound metabolic process	27	1824	35698	0.00048	0.018	// Os11g0143300 // Os07g0545800 // Os05g0322900 // Os09g0457900 // Os01g0821600 // Os09g0522000 // Os07g0583600 // Os02g0764700 // Os09g0522100 // Os05g0497300 // Os03g0181100 // Os03g0402800 // Os04g0669200 // Os02g0527300 // Os02g0181300 // Os06g0127100 // Os02g0677300 // Os09g0334500 // Os02g0766700 // Os08g0544800 // Os09g0417600 // Os12g0139400 // Os04g0610400 // Os09g0522200 // Os04g0605100…
GO:0010468	P	regulation of gene expression	27	1844	35698	0.00056	0.02	// Os11g0143300 // Os07g0545800 // Os05g0322900 // Os09g0457900 // Os01g0821600 // Os09g0522000 // Os07g0583600 // Os02g0764700 // Os09g0522100 // Os05g0497300 // Os03g0181100 // Os03g0402800 // Os04g0669200 // Os02g0527300 // Os02g0181300 // Os06g0127100 // Os02g0677300 // Os09g0334500 // Os02g0766700 // Os08g0544800 // Os09g0417600 // Os12g0139400 // Os04g0610400 // Os09g0522200 // Os04g0605100…
GO:0080090	P	regulation of primary metabolic process	27	1929	35698	0.0011	0.035	// Os11g0143300 // Os07g0545800 // Os05g0322900 // Os09g0457900 // Os01g0821600 // Os09g0522000 // Os07g0583600 // Os02g0764700 // Os09g0522100 // Os05g0497300 // Os03g0181100 // Os03g0402800 // Os04g0669200 // Os02g0527300 // Os02g0181300 // Os06g0127100 // Os02g0677300 // Os09g0334500 // Os02g0766700 // Os08g0544800 // Os09g0417600 // Os12g0139400 // Os04g0610400 // Os09g0522200 // Os04g0605100…
GO:0060255	P	regulation of macromolecule metabolic process	27	1968	35698	0.0014	0.044	// Os11g0143300 // Os07g0545800 // Os05g0322900 // Os09g0457900 // Os01g0821600 // Os09g0522000 // Os07g0583600 // Os02g0764700 // Os09g0522100 // Os05g0497300 // Os03g0181100 // Os03g0402800 // Os04g0669200 // Os02g0527300 // Os02g0181300 // Os06g0127100 // Os02g0677300 // Os09g0334500 // Os02g0766700 // Os08g0544800 // Os09g0417600 // Os12g0139400 // Os04g0610400 // Os09g0522200 // Os04g0605100…
GO:0031323	P	regulation of cellular metabolic process	27	1979	35698	0.0016	0.045	// Os11g0143300 // Os07g0545800 // Os05g0322900 // Os09g0457900 // Os01g0821600 // Os09g0522000 // Os07g0583600 // Os02g0764700 // Os09g0522100 // Os05g0497300 // Os03g0181100 // Os03g0402800 // Os04g0669200 // Os02g0527300 // Os02g0181300 // Os06g0127100 // Os02g0677300 // Os09g0334500 // Os02g0766700 // Os08g0544800 // Os09g0417600 // Os12g0139400 // Os04g0610400 // Os09g0522200 // Os04g0605100…
CBB23-36 hpi vs. JG30-36 hpi
GO accessions	term type	Term	query item	background item	background total	pvalue	FDR	entries
GO:0009055	F	electron carrier activity	19	230	35698	3.2e-13	1.1e-10	// Os04g0688100 // Os07g0677100 // Os08g0508800 // Os07g0677500 // Os05g0211100 // Os06g0102100 // Os01g0963000 // Os04g0688300 // Os03g0235000 // Os06g0547400 // Os10g0144700 // Os02g0236800 // Os10g0109600 // Os10g0320100 // Os04g0578600 // Os07g0677200 // Os06g0501900 // Os03g0140100 // Os03g0225900
GO:0043231	C	intracellular membrane-bounded organelle	187	15750	35698	2.7e-11	1.3e-09	// Os05g0136900 // Os12g0207600 // Os03g0297600 // Os02g0787300 // Os01g0108400 // Os06g0102100 // Os04g0683700 // Os02g0532500 // Os08g0433600 // Os08g0441500 // Os04g0412000 // Os02g0601300 // Os04g0650800 // Os04g0218400 // Os07g0142100 // Os11g0545300 // Os03g0806600 // Os06g0547400 // Os12g0567300 // Os01g0382000 // Os01g0940800 // Os04g0631600 // Os03g0252100 // Os10g0492900 // Os07g0677100…
GO:0043227	C	membrane-bounded organelle	187	15756	35698	2.8e-11	1.3e-09	// Os05g0136900 // Os12g0207600 // Os03g0297600 // Os02g0787300 // Os01g0108400 // Os06g0102100 // Os04g0683700 // Os02g0532500 // Os08g0433600 // Os08g0441500 // Os04g0412000 // Os02g0601300 // Os04g0650800 // Os04g0218400 // Os07g0142100 // Os11g0545300 // Os03g0806600 // Os06g0547400 // Os12g0567300 // Os01g0382000 // Os01g0940800 // Os04g0631600 // Os03g0252100 // Os10g0492900 // Os07g0677100…
GO:0043229	C	intracellular organelle	187	16138	35698	3.1e-10	7.2e-09	// Os05g0136900 // Os12g0207600 // Os03g0297600 // Os02g0787300 // Os01g0108400 // Os06g0102100 // Os04g0683700 // Os02g0532500 // Os08g0433600 // Os08g0441500 // Os04g0412000 // Os02g0601300 // Os04g0650800 // Os04g0218400 // Os07g0142100 // Os11g0545300 // Os03g0806600 // Os06g0547400 // Os12g0567300 // Os01g0382000 // Os01g0940800 // Os04g0631600 // Os03g0252100 // Os10g0492900 // Os07g0677100…
GO:0043226	C	organelle	187	16144	35698	3.2e-10	7.2e-09	// Os05g0136900 // Os12g0207600 // Os03g0297600 // Os02g0787300 // Os01g0108400 // Os06g0102100 // Os04g0683700 // Os02g0532500 // Os08g0433600 // Os08g0441500 // Os04g0412000 // Os02g0601300 // Os04g0650800 // Os04g0218400 // Os07g0142100 // Os11g0545300 // Os03g0806600 // Os06g0547400 // Os12g0567300 // Os01g0382000 // Os01g0940800 // Os04g0631600 // Os03g0252100 // Os10g0492900 // Os07g0677100…
GO:0044424	C	intracellular part	193	17108	35698	1.2e-09	2.2e-08	// Os05g0136900 // Os12g0207600 // Os03g0297600 // Os02g0787300 // Os01g0108400 // Os06g0102100 // Os04g0683700 // Os02g0532500 // Os08g0433600 // Os08g0441500 // Os04g0412000 // Os02g0601300 // Os05g0402700 // Os04g0650800 // Os04g0218400 // Os07g0142100 // Os11g0545300 // Os03g0806600 // Os06g0547400 // Os12g0567300 // Os01g0382000 // Os01g0940800 // Os04g0631600 // Os03g0252100 // Os10g0492900…
GO:0005622	C	intracellular	194	17282	35698	1.6e-09	2.5e-08	// Os05g0136900 // Os12g0207600 // Os03g0297600 // Os02g0787300 // Os01g0108400 // Os06g0102100 // Os04g0683700 // Os02g0532500 // Os08g0433600 // Os08g0441500 // Os04g0412000 // Os02g0601300 // Os05g0402700 // Os04g0650800 // Os04g0218400 // Os07g0142100 // Os11g0545300 // Os03g0806600 // Os06g0547400 // Os12g0567300 // Os01g0382000 // Os01g0940800 // Os04g0631600 // Os03g0252100 // Os10g0492900…
GO:0005737	C	cytoplasm	177	15256	35698	2.2e-09	2.8e-08	// Os05g0136900 // Os12g0207600 // Os03g0297600 // Os02g0787300 // Os03g0300400 // Os06g0102100 // Os04g0683700 // Os02g0532500 // Os08g0433600 // Os08g0441500 // Os04g0412000 // Os02g0601300 // Os05g0402700 // Os04g0650800 // Os04g0218400 // Os07g0142100 // Os11g0545300 // Os03g0806600 // Os06g0547400 // Os02g0718600 // Os01g0382000 // Os01g0940800 // Os03g0252100 // Os10g0492900 // Os07g0677100…
GO:0044464	C	cell part	196	17860	35698	1e-08	1e-07	// Os05g0136900 // Os12g0207600 // Os03g0297600 // Os02g0787300 // Os01g0108400 // Os06g0102100 // Os04g0683700 // Os02g0532500 // Os08g0433600 // Os08g0441500 // Os04g0412000 // Os02g0601300 // Os05g0402700 // Os04g0650800 // Os01g0108000 // Os04g0218400 // Os07g0142100 // Os11g0545300 // Os03g0806600 // Os06g0547400 // Os12g0567300 // Os01g0382000 // Os01g0940800 // Os04g0631600 // Os03g0252100…
GO:0005623	C	cell	196	17860	35698	1e-08	1e-07	// Os05g0136900 // Os12g0207600 // Os03g0297600 // Os02g0787300 // Os01g0108400 // Os06g0102100 // Os04g0683700 // Os02g0532500 // Os08g0433600 // Os08g0441500 // Os04g0412000 // Os02g0601300 // Os05g0402700 // Os04g0650800 // Os01g0108000 // Os04g0218400 // Os07g0142100 // Os11g0545300 // Os03g0806600 // Os06g0547400 // Os12g0567300 // Os01g0382000 // Os01g0940800 // Os04g0631600 // Os03g0252100…
GO:0044444	C	cytoplasmic part	171	14862	35698	1.4e-08	1.2e-07	// Os05g0136900 // Os12g0207600 // Os03g0297600 // Os02g0787300 // Os03g0300400 // Os06g0102100 // Os04g0683700 // Os02g0532500 // Os08g0433600 // Os08g0441500 // Os04g0412000 // Os02g0601300 // Os04g0650800 // Os04g0218400 // Os07g0142100 // Os11g0545300 // Os03g0806600 // Os04g0493400 // Os02g0718600 // Os01g0382000 // Os01g0940800 // Os03g0252100 // Os10g0492900 // Os07g0677100 // Os12g0592900…
GO:0016491	F	oxidoreductase activity	45	1973	35698	1.1e-09	1.8e-07	// Os03g0189400 // Os12g0207600 // Os01g0757200 // Os06g0102100 // Os10g0536400 // Os08g0447000 // Os04g0688300 // Os10g0109600 // Os07g0677200 // Os02g0601300 // Os03g0122300 // Os04g0688100 // Os11g0210300 // Os02g0771600 // Os04g0650800 // Os04g0338100 // Os04g0531900 // Os08g0557600 // Os10g0430200 // Os06g0547400 // Os03g0815200 // Os11g0210500 // Os06g0501900 // Os07g0677100 // Os01g0580500…
GO:0016023	C	cytoplasmic, membrane-bounded vesicle	68	4437	35698	3.7e-07	2.6e-06	// Os05g0136900 // Os04g0412000 // Os11g0588400 // Os07g0198300 // Os01g0940800 // Os01g0135900 // Os02g0532500 // Os05g0217700 // Os03g0803500 // Os10g0109600 // Os12g0629600 // Os03g0103300 // Os07g0677200 // Os06g0356800 // Os12g0218300 // Os12g0630100 // Os04g0191500 // Os04g0688100 // Os03g0103200 // Os01g0713200 // Os03g0130300 // Os01g0940700 // Os11g0687100 // Os03g0806600 // Os09g0412700…
GO:0097708	C	intracellular vesicle	68	4437	35698	3.7e-07	2.6e-06	// Os05g0136900 // Os04g0412000 // Os11g0588400 // Os07g0198300 // Os01g0940800 // Os01g0135900 // Os02g0532500 // Os05g0217700 // Os03g0803500 // Os10g0109600 // Os12g0629600 // Os03g0103300 // Os07g0677200 // Os06g0356800 // Os12g0218300 // Os12g0630100 // Os04g0191500 // Os04g0688100 // Os03g0103200 // Os01g0713200 // Os03g0130300 // Os01g0940700 // Os11g0687100 // Os03g0806600 // Os09g0412700…
GO:0031410	C	cytoplasmic vesicle	68	4437	35698	3.7e-07	2.6e-06	// Os05g0136900 // Os04g0412000 // Os11g0588400 // Os07g0198300 // Os01g0940800 // Os01g0135900 // Os02g0532500 // Os05g0217700 // Os03g0803500 // Os10g0109600 // Os12g0629600 // Os03g0103300 // Os07g0677200 // Os06g0356800 // Os12g0218300 // Os12g0630100 // Os04g0191500 // Os04g0688100 // Os03g0103200 // Os01g0713200 // Os03g0130300 // Os01g0940700 // Os11g0687100 // Os03g0806600 // Os09g0412700…
GO:0031988	C	membrane-bounded vesicle	68	4445	35698	4e-07	2.6e-06	// Os05g0136900 // Os04g0412000 // Os11g0588400 // Os07g0198300 // Os01g0940800 // Os01g0135900 // Os02g0532500 // Os05g0217700 // Os03g0803500 // Os10g0109600 // Os12g0629600 // Os03g0103300 // Os07g0677200 // Os06g0356800 // Os12g0218300 // Os12g0630100 // Os04g0191500 // Os04g0688100 // Os03g0103200 // Os01g0713200 // Os03g0130300 // Os01g0940700 // Os11g0687100 // Os03g0806600 // Os09g0412700…
GO:0031982	C	vesicle	68	4455	35698	4.3e-07	2.6e-06	// Os05g0136900 // Os04g0412000 // Os11g0588400 // Os07g0198300 // Os01g0940800 // Os01g0135900 // Os02g0532500 // Os05g0217700 // Os03g0803500 // Os10g0109600 // Os12g0629600 // Os03g0103300 // Os07g0677200 // Os06g0356800 // Os12g0218300 // Os12g0630100 // Os04g0191500 // Os04g0688100 // Os03g0103200 // Os01g0713200 // Os03g0130300 // Os01g0940700 // Os11g0687100 // Os03g0806600 // Os09g0412700…
GO:0016684	F	oxidoreductase activity, acting on peroxide as acceptor	11	199	35698	1.5e-06	0.00013	// Os04g0688100 // Os07g0677100 // Os07g0677500 // Os01g0963000 // Os12g0448900 // Os04g0688300 // Os03g0235000 // Os06g0547400 // Os10g0109600 // Os07g0677200 // Os02g0236800
GO:0004601	F	peroxidase activity	11	196	35698	1.3e-06	0.00013	// Os04g0688100 // Os07g0677100 // Os07g0677500 // Os01g0963000 // Os12g0448900 // Os04g0688300 // Os03g0235000 // Os06g0547400 // Os10g0109600 // Os07g0677200 // Os02g0236800
GO:0016829	F	lyase activity	15	398	35698	2e-06	0.00014	// Os08g0320400 // Os05g0427400 // Os05g0402700 // Os02g0626100 // Os02g0627100 // Os01g0905800 // Os08g0191700 // Os12g0207600 // Os03g0264400 // Os06g0661800 // Os08g0168000 // Os01g0770200 // Os10g0517500 // Os09g0539100 // Os10g0356000
GO:0016209	F	antioxidant activity	11	226	35698	4.8e-06	0.00027	// Os04g0688100 // Os07g0677100 // Os07g0677500 // Os01g0963000 // Os12g0448900 // Os04g0688300 // Os03g0235000 // Os06g0547400 // Os10g0109600 // Os07g0677200 // Os02g0236800
GO:0020037	F	heme binding	18	621	35698	6.7e-06	0.00033	// Os04g0688100 // Os07g0677100 // Os10g0144700 // Os07g0677500 // Os05g0211100 // Os06g0102100 // Os01g0963000 // Os12g0448900 // Os04g0688300 // Os03g0235000 // Os06g0547400 // Os02g0236800 // Os10g0109600 // Os10g0320100 // Os03g0140100 // Os07g0677200 // Os06g0501900 // Os03g0225900
GO:0046906	F	tetrapyrrole binding	18	651	35698	1.2e-05	0.00054	// Os04g0688100 // Os07g0677100 // Os10g0144700 // Os07g0677500 // Os05g0211100 // Os06g0102100 // Os01g0963000 // Os12g0448900 // Os04g0688300 // Os03g0235000 // Os06g0547400 // Os02g0236800 // Os10g0109600 // Os10g0320100 // Os03g0140100 // Os07g0677200 // Os06g0501900 // Os03g0225900
GO:0016830	F	carbon-carbon lyase activity	8	130	35698	2e-05	0.00075	// Os08g0320400 // Os05g0402700 // Os01g0770200 // Os01g0905800 // Os12g0207600 // Os03g0264400 // Os10g0356000 // Os06g0661800
GO:0006082	P	organic acid metabolic process	24	960	35698	2.4e-06	0.0019	// Os01g0757200 // Os01g0760600 // Os03g0122300 // Os11g0659500 // Os05g0402700 // Os04g0650800 // Os02g0627100 // Os01g0905800 // Os03g0815200 // Os03g0157900 // Os01g0770200 // Os08g0320400 // Os05g0427400 // Os08g0434300 // Os08g0508800 // Os10g0517500 // Os02g0626100 // Os02g0739600 // Os02g0731900 // Os08g0447000 // Os03g0264400 // Os08g0560000 // Os04g0677500 // Os09g0539100
GO:0004497	F	monooxygenase activity	8	152	35698	5.6e-05	0.0019	// Os12g0207600 // Os10g0144700 // Os05g0211100 // Os06g0102100 // Os03g0140100 // Os10g0320100 // Os06g0501900 // Os03g0225900
GO:0044710	P	single-organism metabolic process	59	3970	35698	7e-06	0.0028	// Os03g0189400 // Os05g0427400 // Os12g0207600 // Os01g0757200 // Os01g0223200 // Os01g0760600 // Os08g0447000 // Os06g0351500 // Os11g0455500 // Os10g0109600 // Os02g0589000 // Os07g0677200 // Os02g0601300 // Os03g0122300 // Os04g0688100 // Os11g0210300 // Os05g0402700 // Os04g0650800 // Os04g0338100 // Os08g0557600 // Os10g0430200 // Os01g0905800 // Os11g0659500 // Os06g0547400 // Os03g0815200…
GO:0005509	F	calcium ion binding	11	365	35698	0.00031	0.0096	// Os04g0688100 // Os07g0677100 // Os07g0677500 // Os01g0963000 // Os04g0688300 // Os03g0235000 // Os06g0547400 // Os10g0109600 // Os06g0254300 // Os07g0677200 // Os02g0236800
GO:0008237	F	metallopeptidase activity	5	81	35698	0.00072	0.021	// Os07g0524900 // Os12g0434400 // Os04g0581100 // Os02g0771600 // Os05g0127500
GO:0009536	C	plastid	57	5008	35698	0.0076	0.043	// Os09g0518000 // Os05g0382900 // Os02g0526400 // Os12g0207600 // Os03g0297600 // Os05g0243200 // Os08g0422600 // Os12g0434400 // Os01g0389200 // Os04g0683700 // Os02g0711400 // Os09g0571200 // Os02g0275200 // Os03g0300400 // Os02g0601300 // Os06g0661800 // Os11g0659500 // Os04g0650800 // Os05g0444200 // Os06g0289900 // Os02g0718600 // Os05g0494200 // Os03g0168200 // Os08g0168000 // Os03g0264400…
GO:0044281	P	small molecule metabolic process	27	1550	35698	0.00027	0.044	// Os01g0757200 // Os01g0760600 // Os11g0455500 // Os02g0601300 // Os03g0122300 // Os11g0659500 // Os05g0402700 // Os04g0650800 // Os02g0627100 // Os01g0905800 // Os03g0815200 // Os03g0157900 // Os01g0770200 // Os08g0320400 // Os05g0427400 // Os09g0442600 // Os08g0434300 // Os08g0508800 // Os10g0517500 // Os02g0626100 // Os02g0739600 // Os02g0731900 // Os08g0447000 // Os03g0264400 // Os08g0560000…
GO:0046031	P	ADP metabolic process	5	81	35698	0.00072	0.044	// Os01g0905800 // Os08g0434300 // Os05g0402700 // Os04g0677500 // Os02g0739600
GO:0043436	P	oxoacid metabolic process	18	851	35698	0.00034	0.044	// Os11g0659500 // Os05g0427400 // Os05g0402700 // Os04g0650800 // Os02g0626100 // Os01g0760600 // Os02g0627100 // Os02g0739600 // Os02g0731900 // Os08g0447000 // Os08g0434300 // Os03g0815200 // Os01g0905800 // Os08g0508800 // Os10g0517500 // Os04g0677500 // Os01g0770200 // Os03g0157900
GO:0009179	P	purine ribonucleoside diphosphate metabolic process	5	81	35698	0.00072	0.044	// Os01g0905800 // Os08g0434300 // Os05g0402700 // Os04g0677500 // Os02g0739600
GO:0006757	P	ATP generation from ADP	5	80	35698	0.00069	0.044	// Os01g0905800 // Os08g0434300 // Os05g0402700 // Os04g0677500 // Os02g0739600
GO:0009135	P	purine nucleoside diphosphate metabolic process	5	81	35698	0.00072	0.044	// Os01g0905800 // Os08g0434300 // Os05g0402700 // Os04g0677500 // Os02g0739600
GO:0009185	P	ribonucleoside diphosphate metabolic process	5	81	35698	0.00072	0.044	// Os01g0905800 // Os08g0434300 // Os05g0402700 // Os04g0677500 // Os02g0739600
GO:0019752	P	carboxylic acid metabolic process	18	834	35698	0.00027	0.044	// Os11g0659500 // Os05g0427400 // Os05g0402700 // Os04g0650800 // Os02g0626100 // Os01g0760600 // Os02g0627100 // Os02g0739600 // Os02g0731900 // Os08g0447000 // Os08g0434300 // Os03g0815200 // Os01g0905800 // Os08g0508800 // Os10g0517500 // Os04g0677500 // Os01g0770200 // Os03g0157900
GO:0006091	P	generation of precursor metabolites and energy	12	425	35698	0.00029	0.044	// Os05g0402700 // Os08g0508800 // Os05g0211100 // Os08g0557600 // Os01g0760600 // Os02g0739600 // Os10g0320100 // Os08g0434300 // Os01g0905800 // Os10g0144700 // Os04g0677500 // Os06g0501900
GO:0006096	P	glycolytic process	5	80	35698	0.00069	0.044	// Os01g0905800 // Os08g0434300 // Os05g0402700 // Os04g0677500 // Os02g0739600
GO:0006520	P	cellular amino acid metabolic process	10	339	35698	0.00067	0.044	// Os05g0427400 // Os04g0650800 // Os02g0626100 // Os01g0760600 // Os02g0627100 // Os08g0447000 // Os03g0815200 // Os10g0517500 // Os03g0157900 // Os01g0770200
GO:0055114	P	oxidation-reduction process	28	1753	35698	0.0008	0.046	// Os03g0189400 // Os12g0207600 // Os01g0760600 // Os04g0688300 // Os10g0109600 // Os07g0677200 // Os03g0122300 // Os04g0688100 // Os11g0210300 // Os08g0508800 // Os04g0338100 // Os08g0557600 // Os10g0430200 // Os06g0547400 // Os03g0815200 // Os11g0210500 // Os06g0501900 // Os07g0677100 // Os05g0211100 // Os11g0210600 // Os03g0235000 // Os02g0187800 // Os10g0144700 // Os07g0677500 // Os10g0320100…
CBB23-48 hpi vs. JG30-48 hpi
GO accesions	term type	Term	query item	background item	background total	pvalue	FDR	entries
GO:0009055	F	electron carrier activity	20	230	35698	5.3e-16	1.5e-13	// Os08g0507100 // Os11g0635500 // Os06g0568600 // Os02g0185200 // Os10g0512400 // Os08g0508800 // Os02g0814400 // Os07g0147900 // Os05g0320700 // Os06g0129900 // Os08g0323400 // Os02g0569900 // Os03g0225900 // Os01g0963000 // Os04g0178400 // Os05g0101600 // Os01g0190000 // Os07g0677200 // Os07g0134800 // Os08g0509100
GO:0005737	C	cytoplasm	154	15256	35698	8.6e-12	1.2e-09	// Os09g0347300 // Os05g0102000 // Os05g0217800 // Os01g0101700 // Os08g0422600 // Os07g0147900 // Os07g0477500 // Os02g0140400 // Os07g0179300 // Os07g0540600 // Os05g0429500 // Os10g0512400 // Os01g0719100 // Os02g0157700 // Os09g0557800 // Os02g0822600 // Os11g0545300 // Os09g0564000 // Os02g0185200 // Os06g0270200 // Os05g0375400 // Os03g0331600 // Os03g0711100 // Os06g0493100 // Os10g0537800…
GO:0044444	C	cytoplasmic part	150	14862	35698	2.9e-11	1.9e-09	// Os09g0347300 // Os05g0102000 // Os05g0217800 // Os01g0101700 // Os08g0422600 // Os07g0147900 // Os07g0477500 // Os02g0140400 // Os07g0179300 // Os07g0540600 // Os05g0429500 // Os10g0512400 // Os01g0719100 // Os02g0157700 // Os09g0557800 // Os02g0822600 // Os11g0545300 // Os09g0564000 // Os02g0185200 // Os06g0270200 // Os05g0375400 // Os03g0331600 // Os03g0711100 // Os06g0493100 // Os10g0537800…
GO:0043231	C	intracellular membrane-bounded organelle	154	15750	35698	1.5e-10	5.3e-09	// Os09g0347300 // Os05g0102000 // Os05g0217800 // Os01g0101700 // Os08g0422600 // Os07g0147900 // Os07g0477500 // Os02g0140400 // Os07g0179300 // Os07g0540600 // Os05g0429500 // Os10g0512400 // Os01g0719100 // Os02g0157700 // Os09g0557800 // Os02g0822600 // Os11g0545300 // Os09g0564000 // Os02g0185200 // Os06g0270200 // Os05g0375400 // Os03g0331600 // Os03g0711100 // Os06g0264300 // Os06g0493100…
GO:0043227	C	membrane-bounded organelle	154	15756	35698	1.6e-10	5.3e-09	// Os09g0347300 // Os05g0102000 // Os05g0217800 // Os01g0101700 // Os08g0422600 // Os07g0147900 // Os07g0477500 // Os02g0140400 // Os07g0179300 // Os07g0540600 // Os05g0429500 // Os10g0512400 // Os01g0719100 // Os02g0157700 // Os09g0557800 // Os02g0822600 // Os11g0545300 // Os09g0564000 // Os02g0185200 // Os06g0270200 // Os05g0375400 // Os03g0331600 // Os03g0711100 // Os06g0264300 // Os06g0493100…
GO:0043229	C	intracellular organelle	156	16138	35698	2.4e-10	5.7e-09	// Os09g0347300 // Os05g0102000 // Os05g0217800 // Os01g0101700 // Os08g0422600 // Os07g0147900 // Os07g0477500 // Os02g0140400 // Os07g0179300 // Os07g0540600 // Os05g0429500 // Os10g0512400 // Os01g0719100 // Os02g0157700 // Os09g0557800 // Os02g0822600 // Os11g0545300 // Os09g0564000 // Os02g0185200 // Os06g0270200 // Os05g0375400 // Os03g0331600 // Os03g0711100 // Os06g0264300 // Os06g0493100…
GO:0043226	C	organelle	156	16144	35698	2.5e-10	5.7e-09	// Os09g0347300 // Os05g0102000 // Os05g0217800 // Os01g0101700 // Os08g0422600 // Os07g0147900 // Os07g0477500 // Os02g0140400 // Os07g0179300 // Os07g0540600 // Os05g0429500 // Os10g0512400 // Os01g0719100 // Os02g0157700 // Os09g0557800 // Os02g0822600 // Os11g0545300 // Os09g0564000 // Os02g0185200 // Os06g0270200 // Os05g0375400 // Os03g0331600 // Os03g0711100 // Os06g0264300 // Os06g0493100…
GO:0009536	C	plastid	70	5008	35698	8.1e-10	1.6e-08	// Os09g0518000 // Os09g0347300 // Os05g0102000 // Os01g0101700 // Os11g0474800 // Os08g0422600 // Os01g0884900 // Os07g0190000 // Os11g0655000 // Os07g0179300 // Os05g0429500 // Os11g0216100 // Os12g0145700 // Os03g0856500 // Os03g0769100 // Os01g0678600 // Os02g0157700 // Os08g0508800 // Os03g0355900 // Os06g0247800 // Os12g0575000 // Os01g0278900 // Os02g0822600 // Os05g0110100 // Os07g0147900…
GO:0005622	C	intracellular	161	17282	35698	1.8e-09	2.7e-08	// Os09g0347300 // Os05g0102000 // Os05g0217800 // Os01g0101700 // Os08g0422600 // Os07g0147900 // Os07g0477500 // Os02g0140400 // Os07g0179300 // Os07g0540600 // Os05g0429500 // Os10g0512400 // Os01g0719100 // Os02g0157700 // Os09g0557800 // Os02g0822600 // Os11g0545300 // Os09g0564000 // Os02g0185200 // Os06g0270200 // Os05g0375400 // Os03g0331600 // Os03g0711100 // Os06g0264300 // Os06g0493100…
GO:0044424	C	intracellular part	160	17108	35698	1.6e-09	2.7e-08	// Os09g0347300 // Os05g0102000 // Os05g0217800 // Os01g0101700 // Os08g0422600 // Os07g0147900 // Os07g0477500 // Os02g0140400 // Os07g0179300 // Os07g0540600 // Os05g0429500 // Os10g0512400 // Os01g0719100 // Os02g0157700 // Os09g0557800 // Os02g0822600 // Os11g0545300 // Os09g0564000 // Os02g0185200 // Os06g0270200 // Os05g0375400 // Os03g0331600 // Os03g0711100 // Os06g0264300 // Os06g0493100…
GO:0044464	C	cell part	164	17860	35698	3.1e-09	3.9e-08	// Os09g0347300 // Os05g0102000 // Os05g0217800 // Os01g0101700 // Os08g0422600 // Os07g0147900 // Os07g0477500 // Os02g0140400 // Os07g0179300 // Os07g0540600 // Os05g0429500 // Os10g0512400 // Os01g0719100 // Os02g0157700 // Os09g0557800 // Os02g0822600 // Os11g0545300 // Os09g0564000 // Os02g0185200 // Os06g0270200 // Os07g0424400 // Os05g0375400 // Os03g0331600 // Os03g0711100 // Os06g0264300…
GO:0005623	C	cell	164	17860	35698	3.1e-09	3.9e-08	// Os09g0347300 // Os05g0102000 // Os05g0217800 // Os01g0101700 // Os08g0422600 // Os07g0147900 // Os07g0477500 // Os02g0140400 // Os07g0179300 // Os07g0540600 // Os05g0429500 // Os10g0512400 // Os01g0719100 // Os02g0157700 // Os09g0557800 // Os02g0822600 // Os11g0545300 // Os09g0564000 // Os02g0185200 // Os06g0270200 // Os07g0424400 // Os05g0375400 // Os03g0331600 // Os03g0711100 // Os06g0264300…
GO:0004497	F	monooxygenase activity	11	152	35698	1.4e-08	2e-06	// Os08g0507100 // Os11g0635500 // Os06g0568600 // Os02g0185200 // Os10g0512400 // Os05g0320700 // Os05g0101600 // Os02g0569900 // Os06g0129900 // Os04g0178400 // Os03g0225900
GO:0016491	F	oxidoreductase activity	33	1973	35698	1.4e-06	0.00014	// Os08g0507100 // Os06g0568600 // Os10g0512400 // Os06g0727200 // Os10g0536400 // Os02g0115700 // Os07g0564500 // Os01g0190000 // Os07g0677200 // Os03g0122300 // Os08g0114300 // Os08g0508800 // Os06g0270900 // Os04g0581100 // Os07g0147900 // Os08g0126300 // Os07g0134800 // Os08g0509100 // Os02g0185200 // Os08g0424500 // Os11g0210600 // Os05g0320700 // Os11g0186200 // Os02g0274100 // Os04g0178400…
GO:0005840	C	ribosome	13	494	35698	3.8e-05	0.00043	// Os01g0678600 // Os05g0101400 // Os06g0647100 // Os03g0769100 // Os01g0662300 // Os02g0822600 // Os03g0815400 // Os03g0843400 // Os03g0219900 // Os03g0856500 // Os03g0196800 // Os04g0691600 // Os01g0633000
GO:0020037	F	heme binding	16	621	35698	6.3e-06	0.00046	// Os08g0507100 // Os11g0635500 // Os06g0568600 // Os02g0185200 // Os10g0512400 // Os06g0727200 // Os02g0115700 // Os05g0320700 // Os05g0101600 // Os02g0569900 // Os06g0129900 // Os01g0963000 // Os04g0178400 // Os07g0677200 // Os02g0814400 // Os03g0225900
GO:0016101	P	diterpenoid metabolic process	6	42	35698	7.7e-07	0.00052	// Os09g0417600 // Os02g0571800 // Os11g0474800 // Os04g0178300 // Os04g0178400 // Os03g0122300
GO:0046906	F	tetrapyrrole binding	16	651	35698	1.1e-05	0.0006	// Os08g0507100 // Os11g0635500 // Os06g0568600 // Os02g0185200 // Os10g0512400 // Os06g0727200 // Os02g0115700 // Os05g0320700 // Os05g0101600 // Os02g0569900 // Os06g0129900 // Os01g0963000 // Os04g0178400 // Os07g0677200 // Os02g0814400 // Os03g0225900
GO:0005198	F	structural molecule activity	14	510	35698	1.2e-05	0.0006	// Os01g0678600 // Os05g0101400 // Os06g0647100 // Os03g0769100 // Os01g0662300 // Os03g0196800 // Os02g0822600 // Os03g0815400 // Os06g0671900 // Os03g0843400 // Os03g0219900 // Os06g0731800 // Os04g0691600 // Os01g0633000
GO:0003735	F	structural constituent of ribosome	12	416	35698	3.2e-05	0.0014	// Os01g0678600 // Os05g0101400 // Os06g0647100 // Os03g0769100 // Os01g0662300 // Os02g0822600 // Os03g0815400 // Os03g0843400 // Os03g0219900 // Os03g0196800 // Os04g0691600 // Os01g0633000
GO:0006721	P	terpenoid metabolic process	7	96	35698	5.9e-06	0.002	// Os09g0417600 // Os07g0190000 // Os11g0474800 // Os02g0571800 // Os04g0178300 // Os04g0178400 // Os03g0122300
GO:0030529	C	intracellular ribonucleoprotein complex	13	599	35698	0.00025	0.0024	// Os01g0678600 // Os05g0101400 // Os06g0647100 // Os03g0769100 // Os01g0662300 // Os02g0822600 // Os03g0815400 // Os03g0843400 // Os03g0219900 // Os03g0856500 // Os03g0196800 // Os04g0691600 // Os01g0633000
GO:1990904	C	ribonucleoprotein complex	13	599	35698	0.00025	0.0024	// Os01g0678600 // Os05g0101400 // Os06g0647100 // Os03g0769100 // Os01g0662300 // Os02g0822600 // Os03g0815400 // Os03g0843400 // Os03g0219900 // Os03g0856500 // Os03g0196800 // Os04g0691600 // Os01g0633000
GO:0006720	P	isoprenoid metabolic process	7	122	35698	2.6e-05	0.0058	// Os09g0417600 // Os07g0190000 // Os11g0474800 // Os02g0571800 // Os04g0178300 // Os04g0178400 // Os03g0122300
GO:0031982	C	vesicle	47	4455	35698	0.001	0.0071	// Os04g0474800 // Os06g0647400 // Os06g0568600 // Os05g0217800 // Os07g0124100 // Os12g0115100 // Os07g0477500 // Os05g0217700 // Os11g0115400 // Os07g0540600 // Os11g0588400 // Os10g0512400 // Os07g0677200 // Os05g0103400 // Os08g0114300 // Os09g0557800 // Os05g0522600 // Os08g0174700 // Os11g0687100 // Os09g0564000 // Os09g0537700 // Os12g0630100 // Os02g0228300 // Os03g0782200 // Os11g0635500…
GO:0016023	C	cytoplasmic, membrane-bounded vesicle	47	4437	35698	0.00092	0.0071	// Os04g0474800 // Os06g0647400 // Os06g0568600 // Os05g0217800 // Os07g0124100 // Os12g0115100 // Os07g0477500 // Os05g0217700 // Os11g0115400 // Os07g0540600 // Os11g0588400 // Os10g0512400 // Os07g0677200 // Os05g0103400 // Os08g0114300 // Os09g0557800 // Os05g0522600 // Os08g0174700 // Os11g0687100 // Os09g0564000 // Os09g0537700 // Os12g0630100 // Os02g0228300 // Os03g0782200 // Os11g0635500…
GO:0097708	C	intracellular vesicle	47	4437	35698	0.00092	0.0071	// Os04g0474800 // Os06g0647400 // Os06g0568600 // Os05g0217800 // Os07g0124100 // Os12g0115100 // Os07g0477500 // Os05g0217700 // Os11g0115400 // Os07g0540600 // Os11g0588400 // Os10g0512400 // Os07g0677200 // Os05g0103400 // Os08g0114300 // Os09g0557800 // Os05g0522600 // Os08g0174700 // Os11g0687100 // Os09g0564000 // Os09g0537700 // Os12g0630100 // Os02g0228300 // Os03g0782200 // Os11g0635500…
GO:0031988	C	membrane-bounded vesicle	47	4445	35698	0.00096	0.0071	// Os04g0474800 // Os06g0647400 // Os06g0568600 // Os05g0217800 // Os07g0124100 // Os12g0115100 // Os07g0477500 // Os05g0217700 // Os11g0115400 // Os07g0540600 // Os11g0588400 // Os10g0512400 // Os07g0677200 // Os05g0103400 // Os08g0114300 // Os09g0557800 // Os05g0522600 // Os08g0174700 // Os11g0687100 // Os09g0564000 // Os09g0537700 // Os12g0630100 // Os02g0228300 // Os03g0782200 // Os11g0635500…
GO:0031410	C	cytoplasmic vesicle	47	4437	35698	0.00092	0.0071	// Os04g0474800 // Os06g0647400 // Os06g0568600 // Os05g0217800 // Os07g0124100 // Os12g0115100 // Os07g0477500 // Os05g0217700 // Os11g0115400 // Os07g0540600 // Os11g0588400 // Os10g0512400 // Os07g0677200 // Os05g0103400 // Os08g0114300 // Os09g0557800 // Os05g0522600 // Os08g0174700 // Os11g0687100 // Os09g0564000 // Os09g0537700 // Os12g0630100 // Os02g0228300 // Os03g0782200 // Os11g0635500…
GO:0046034	P	ATP metabolic process	7	176	35698	0.00023	0.039	// Os07g0695800 // Os06g0568200 // Os07g0134800 // Os02g0176700 // Os03g0278900 // Os12g0145700 // Os08g0120600
GO:0009167	P	purine ribonucleoside monophosphate metabolic process	7	192	35698	0.00038	0.043	// Os07g0695800 // Os06g0568200 // Os07g0134800 // Os02g0176700 // Os03g0278900 // Os12g0145700 // Os08g0120600
GO:0009126	P	purine nucleoside monophosphate metabolic process	7	192	35698	0.00038	0.043	// Os07g0695800 // Os06g0568200 // Os07g0134800 // Os02g0176700 // Os03g0278900 // Os12g0145700 // Os08g0120600
GO:0009161	P	ribonucleoside monophosphate metabolic process	7	205	35698	0.00056	0.044	// Os07g0695800 // Os06g0568200 // Os07g0134800 // Os02g0176700 // Os03g0278900 // Os12g0145700 // Os08g0120600
GO:0043043	P	peptide biosynthetic process	13	688	35698	0.00088	0.044	// Os01g0678600 // Os05g0101400 // Os06g0647100 // Os03g0769100 // Os01g0662300 // Os02g0822600 // Os03g0815400 // Os03g0843400 // Os03g0177500 // Os03g0219900 // Os03g0196800 // Os04g0691600 // Os01g0633000
GO:1901564	P	organonitrogen compound metabolic process	24	1768	35698	0.00089	0.044	// Os01g0760600 // Os03g0177500 // Os12g0145700 // Os06g0647100 // Os07g0695800 // Os02g0822600 // Os07g0134800 // Os04g0691600 // Os08g0424500 // Os03g0769100 // Os06g0568200 // Os01g0662300 // Os02g0176700 // Os03g0815400 // Os03g0278900 // Os03g0291500 // Os06g0149900 // Os01g0633000 // Os01g0678600 // Os05g0101400 // Os03g0196800 // Os03g0219900 // Os08g0120600 // Os03g0843400
GO:1901566	P	organonitrogen compound biosynthetic process	19	1210	35698	0.00059	0.044	// Os01g0678600 // Os05g0101400 // Os06g0647100 // Os06g0149900 // Os03g0769100 // Os06g0568200 // Os01g0662300 // Os02g0822600 // Os02g0176700 // Os03g0815400 // Os08g0424500 // Os03g0278900 // Os03g0843400 // Os03g0177500 // Os03g0219900 // Os03g0196800 // Os04g0691600 // Os01g0633000 // Os03g0291500
GO:0009123	P	nucleoside monophosphate metabolic process	7	209	35698	0.00063	0.044	// Os07g0695800 // Os06g0568200 // Os07g0134800 // Os02g0176700 // Os03g0278900 // Os12g0145700 // Os08g0120600
GO:0043604	P	amide biosynthetic process	13	691	35698	0.00091	0.044	// Os01g0678600 // Os05g0101400 // Os06g0647100 // Os03g0769100 // Os01g0662300 // Os02g0822600 // Os03g0815400 // Os03g0843400 // Os03g0177500 // Os03g0219900 // Os03g0196800 // Os04g0691600 // Os01g0633000
GO:0006091	P	generation of precursor metabolites and energy	10	425	35698	0.0007	0.044	// Os08g0507100 // Os08g0508800 // Os08g0120600 // Os01g0760600 // Os07g0147900 // Os05g0101600 // Os02g0569900 // Os12g0145700 // Os07g0695800 // Os07g0134800
GO:0006412	P	translation	13	678	35698	0.00077	0.044	// Os01g0678600 // Os05g0101400 // Os06g0647100 // Os03g0769100 // Os01g0662300 // Os02g0822600 // Os03g0815400 // Os03g0843400 // Os03g0177500 // Os03g0219900 // Os03g0196800 // Os04g0691600 // Os01g0633000
GO:0006518	P	peptide metabolic process	13	704	35698	0.0011	0.048	// Os01g0678600 // Os05g0101400 // Os06g0647100 // Os03g0769100 // Os01g0662300 // Os02g0822600 // Os03g0815400 // Os03g0843400 // Os03g0177500 // Os03g0219900 // Os03g0196800 // Os04g0691600 // Os01g0633000

## Sheet: S7
Table S7. MapMan analysis of DEGs in CBB23 vs. JG30 after PXO99A infection in biotic stress. The MapMan functional class, gene ID, gene description and ratio between CBB23 and JG30 after PXO99A are presented in the table.
BinCode	BinName	id	type	description	CBB23 vs JG30
10.2.1	cell wall.cellulose synthesis.cellulose synthase	os07g0424400	Transcript	nearly identical (1357) AT5G64740 | Symbols: CESA6, IXR2, E112, PRC1 | CESA6 (CELLULOSE SYNTHASE 6); cellulose synthase/ transferase, transferring glycosyl groups | chr5:25881555-25886333 FORWARDCellulose_synt protein|CESA3 - cellulose synthase, expressed	-1.1089
10.2.1	cell wall.cellulose synthesis.cellulose synthase	os04g0429600	Transcript	moderately similar to ( 240) AT4G15290 | Symbols: ATCSLB05, CSLB05, ATCSLB5 | ATCSLB05; cellulose synthase/ transferase/ transferase, transferring glycosyl groups | chr4:8721693-8726599 REVERSECellulose_synt protein|CSLH3 - cellulose synthase-like family H, expressed	-4.2602
10.2.2	cell wall.cellulose synthesis.COBRA	os03g0301200	Transcript	highly similar to ( 665) AT4G16120 | Symbols: ATSEB1, COBL7, SEB1 | COBL7 (COBRA-LIKE 7) | chr4:9116591-9119138 REVERSEweakly similar to ( 150) COBL1_ORYSA COBRA-like 1 protein precursor (BRITTLE CULM1-like 6 protein) - Oryza sativa (Rice)Phytochel_synth protein|COBRA-like protein 7 precursor, putative, expressed	2.1873
10.3	cell wall.hemicellulose synthesis	os02g0275200	Transcript	moderately similar to ( 391) AT2G03210 | Symbols: FUT2, ATFUT2 | FUT2 (FUCOSYLTRANSFERASE 2); fucosyltransferase/ transferase, transferring glycosyl groups | chr2:968335-970018 REVERSEmoderately similar to ( 412) FUT1_PEA Galactoside 2-alpha-L-fucosyltransferase (EC 2.4.1.69) (Xyloglucan alpha-(1,2)-fucosyltransferase) (PsFT1) - Pisum sativum (Garden pea)XG_FTase protein|xyloglucan fucosyltransfe…	1.3768
[truncated: 252 more rows]

## Sheet: S8
Table S8. Significantly enriched KEGG pathway in CBB23 vs JG30 at different time intervals of before and after infection of PXO99A (P value ≤ 0.05).
[truncated: 39 more rows]

[truncated: 1 more sheets: S9]
